# Supplementary material
Source: publisher figshare collection journal article supplement (https://acs.figshare.com/ndownloader/files/28609589)
Supplement: Supplementary file 1 [file 28609589]

data_exp_42
_audit_creation_date               2020-07-14
_audit_creation_method
;
Olex2 1.2
(compiled 2018.05.29 svn.r3508 for OlexSys, GUI svn.r5506)
;
_shelx_SHELXL_version_number       '2014/7'
_audit_contact_author_address      ?
_audit_contact_author_email        ?
_audit_contact_author_name         ''
_audit_contact_author_phone        ?
_publ_contact_author_id_orcid      ?
_publ_section_references
;
Dolomanov, O.V., Bourhis, L.J., Gildea, R.J, Howard, J.A.K. & Puschmann, H.
 (2009), J. Appl. Cryst. 42, 339-341.

Sheldrick, G.M. (2008). Acta Cryst. A64, 112-122.
;
_chemical_name_common              ?
_chemical_name_systematic          ?
_chemical_formula_moiety           'C31 H36 N2 O6, 3(C H4 O)'
_chemical_formula_sum              'C34 H48 N2 O9'
_chemical_formula_weight           628.74
_chemical_absolute_configuration   ad
_chemical_melting_point            ?
loop_
  _atom_type_symbol
  _atom_type_description
  _atom_type_scat_dispersion_real
  _atom_type_scat_dispersion_imag
  _atom_type_scat_source
 'C' 'C' 0.0181 0.0091 'International Tables Vol C Tables 4.2.6.8 and 6.1.1.4'
 'H' 'H' 0.0000 0.0000 'International Tables Vol C Tables 4.2.6.8 and 6.1.1.4'
 'N' 'N' 0.0311 0.0180 'International Tables Vol C Tables 4.2.6.8 and 6.1.1.4'
 'O' 'O' 0.0492 0.0322 'International Tables Vol C Tables 4.2.6.8 and 6.1.1.4'

_shelx_space_group_comment
;
The symmetry employed for this shelxl refinement is uniquely defined
by the following loop, which should always be used as a source of
symmetry information in preference to the above space-group names.
They are only intended as comments.
;
_space_group_crystal_system        'orthorhombic'
_space_group_IT_number             19
_space_group_name_H-M_alt          'P 21 21 21'
_space_group_name_Hall             'P 2ac 2ab'
loop_
  _space_group_symop_operation_xyz
 'x, y, z'
 '-x+1/2, -y, z+1/2'
 'x+1/2, -y+1/2, -z'
 '-x, y+1/2, -z+1/2'

_cell_length_a                     7.13141(4)
_cell_length_b                     15.63357(6)
_cell_length_c                     30.34804(13)
_cell_angle_alpha                  90
_cell_angle_beta                   90
_cell_angle_gamma                  90
_cell_volume                       3383.49(3)
_cell_formula_units_Z              4
_cell_measurement_reflns_used      55525
_cell_measurement_temperature      100.00(10)
_cell_measurement_theta_max        73.6310
_cell_measurement_theta_min        3.2190
_shelx_estimated_absorpt_T_max     0.978
_shelx_estimated_absorpt_T_min     0.712
_exptl_absorpt_coefficient_mu      0.729
_exptl_absorpt_correction_T_max    1.00000
_exptl_absorpt_correction_T_min    0.65364
_exptl_absorpt_correction_type     multi-scan
_exptl_absorpt_process_details
;
CrysAlisPro 1.171.39.28b (Rigaku Oxford Diffraction, 2015)
Empirical absorption correction using spherical harmonics,
 implemented in SCALE3 ABSPACK scaling algorithm.
;
_exptl_absorpt_special_details     ?
_exptl_crystal_colour              colourless
_exptl_crystal_colour_primary      colourless
_exptl_crystal_density_diffrn      1.234
_exptl_crystal_density_meas        ?
_exptl_crystal_density_method      ?
_exptl_crystal_description         plate
_exptl_crystal_F_000               1352
_exptl_crystal_size_max            0.5
_exptl_crystal_size_mid            0.1
_exptl_crystal_size_min            0.03
_exptl_transmission_factor_max     ?
_exptl_transmission_factor_min     ?
_diffrn_reflns_av_R_equivalents    0.0457
_diffrn_reflns_av_unetI/netI       0.0179
_diffrn_reflns_Laue_measured_fraction_full  1.000
_diffrn_reflns_Laue_measured_fraction_max  0.996
_diffrn_reflns_limit_h_max         8
_diffrn_reflns_limit_h_min         -8
_diffrn_reflns_limit_k_max         19
_diffrn_reflns_limit_k_min         -19
_diffrn_reflns_limit_l_max         37
_diffrn_reflns_limit_l_min         -37
_diffrn_reflns_number              87098
_diffrn_reflns_point_group_measured_fraction_full  1.000
_diffrn_reflns_point_group_measured_fraction_max  0.994
_diffrn_reflns_theta_full          67.684
_diffrn_reflns_theta_max           74.081
_diffrn_reflns_theta_min           2.912
_diffrn_ambient_environment        N~2~
_diffrn_ambient_temperature        100.00(10)
_diffrn_detector                   'CCD plate'
_diffrn_detector_area_resol_mean   ?
_diffrn_measured_fraction_theta_full  1.000
_diffrn_measured_fraction_theta_max  0.996
_diffrn_measurement_details
;
List of Runs (angles in degrees, time in seconds):

  # Type    Start    End  Width  t~exp~   \w     \q     \k     \f   Frames
--------------------------------------------------------------------------
  1  \w    -22.00  88.00   0.50    0.50    --    0.00  57.00  60.00  220
  2  \w     26.00  57.00   0.50    0.50    --    0.00  19.00-150.00   62
  3  \w    -89.00 -34.00   0.50    0.50    --    0.00 -38.00-180.00  110
  4  \w    -20.00   5.00   0.50    0.50    --    0.00  57.00-180.00   50
  5  \w     30.00  89.00   0.50    0.50    --    0.00  38.00 120.00  118
  6  \w    -25.00  42.00   0.50    0.50    --    0.00  70.00 -25.44  134
  7  \w    -14.00  17.00   0.50    0.50    --    0.00  19.00-150.00   62
  8  \w    -17.00  15.00   0.50    0.50    --    0.00  38.00 120.00   64
  9  \w     47.00  82.00   0.50    0.50    --    0.00  70.00 -25.44   70
 10  \w     31.00  83.00   0.50    0.50    --    0.00  57.00-180.00  104
 11  \w    -18.00  16.00   0.50    0.50    --    0.00 -38.00-180.00   68
 12  \w    -22.00  44.00   0.50    0.50    --    0.00  57.00 -90.00  132
 13  \w     71.00  96.00   0.50    0.50    --   94.60  61.00  41.33   50
 14  \w    157.00 184.00   0.50    0.50    --   94.60  60.00  49.74   54
 15  \w     71.00 183.00   0.50    0.50    --   94.60  59.00  76.06  224
 16  \w    121.00 149.00   0.50    0.50    --   94.60  60.00  49.74   56
 17  \w     71.00  96.00   0.50    0.50    --   94.60  60.00  49.74   50
 18  \w     74.00 107.00   0.50    0.50    --   94.60  49.00  29.58   66
 19  \w     72.00  97.00   0.50    0.50    --   94.60  56.00  26.92   50
 20  \w     66.00  91.00   0.50    0.50    --   94.60  74.00 -41.05   50
 21  \w    158.00 184.00   0.50    0.50    --   94.60  75.00 -60.61   52
 22  \w     71.00  98.00   0.50    0.50    --   94.60  61.00-168.29   54
 23  \w     70.00  96.00   0.50    0.50    --   94.60  64.00-136.07   52
 24  \w     71.00 184.00   0.50    0.50    --   94.60  61.00-136.90  226
 25  \w     67.00  93.00   0.50    0.50    --   94.60  72.00 138.57   52
 26  \w    156.00 182.00   0.50    0.50    --   94.60  72.00 138.57   52
 27  \w     66.00 118.00   0.50    0.50    --   94.60  75.00 127.81  104
 28  \w     67.00  93.00   0.50    0.50    --   94.60  72.00-130.93   52
 29  \w    121.00 147.00   0.50    0.50    --   94.60  72.00-130.93   52
 30  \w     67.00  97.00   0.50    0.50    --   94.60  71.00 121.14   60
 31  \w     66.00  91.00   0.50    0.50    --   94.60  75.00 -60.61   50
 32  \w     71.00 184.00   0.50    0.50    --   94.60  61.00 109.85  226
 33  \w    148.00 174.00   0.50    0.50    --   94.60  72.00 -73.44   52
 34  \w     66.00  91.00   0.50    0.50    --   94.60  75.00-172.76   50
 35  \w    147.00 172.00   0.50    0.50    --   94.60  72.00  73.96   50
 36  \w     67.00  92.00   0.50    0.50    --   94.60  72.00  73.96   50
 37  \w    153.00 179.00   0.50    0.50    --   94.60  65.00-113.69   52
 38  \w     66.00  92.00   0.50    0.50    --   94.60  75.00 -33.37   52
 39  \w     67.00  92.00   0.50    0.50    --   94.60  72.00  -5.79   50
 40  \w    152.00 178.00   0.50    0.50    --   94.60  72.00  -5.79   52
 41  \w      5.00 126.00   0.50    0.50    --   94.60 -82.00 -30.00  242
 42  \w      6.00 120.00   0.50    0.50    --   94.60 -82.00 150.00  228
 43  \w     68.00  93.00   0.50    0.50    --   94.60  70.00 -86.58   50
 44  \w    100.00 126.00   0.50    0.50    --   94.60 -82.00-180.00   52
 45  \w     71.00  96.00   0.50    0.50    --   94.60  61.00 -90.00   50
 46  \w    139.00 165.00   0.50    0.50    --   94.60  61.00 -90.00   52
 47  \w     71.00 130.00   0.50    0.50    --   94.60  62.00  99.44  118
 48  \w     70.00 117.00   0.50    0.50    --   94.60  65.00-113.69   94
 49  \w     67.00  92.00   0.50    0.50    --   94.60  72.00 -73.44   50
 50  \w      8.00  80.00   0.50    0.50    --   94.60 -77.00  30.00  144
 51  \w     91.00 120.00   0.50    0.50    --   94.60 -77.00  30.00   58
 52  \w     73.00  99.00   0.50    0.50    --   94.60  54.00 -88.70   52
 53  \w     67.00 104.00   0.50    0.50    --   94.60  71.00 149.29   74
 54  \w     67.00  92.00   0.50    0.50    --   94.60  71.00 109.34   50
 55  \w     72.00  97.00   0.50    0.50    --   94.60  61.00   0.00   50
 56  \w     72.00 133.00   0.50    0.50    --   94.60  61.00-150.00  122
 57  \w    154.00 179.00   0.50    0.50    --   94.60  61.00-150.00   50
 58  \w     71.00  96.00   0.50    0.50    --   94.60  61.00 -79.19   50
 59  \w    103.00 136.00   0.50    0.50    --   94.60  61.00 -79.19   66
 60  \w    144.00 169.00   0.50    0.50    --   94.60  61.00 -79.19   50
 61  \w     74.00 175.00   0.50    0.50    --   94.60  54.00  -2.09  202
 62  \w    108.00 184.00   0.50    0.50    --   94.60  73.00  11.99  152
 63  \w     71.00  97.00   0.50    0.50    --   94.60  61.00-120.00   52
 64  \w     71.00  97.00   0.50    0.50    --   94.60  61.00-180.00   52
 65  \w     67.00  93.00   0.50    0.50    --   94.60  73.00  11.99   52
 66  \w     75.00 171.00   0.50    0.50    --   94.60  47.00 -50.81  192
 67  \w     72.00  98.00   0.50    0.50    --   94.60  57.00 -26.33   52
 68  \w     68.00  93.00   0.50    0.50    --   94.60  69.00 -57.86   50
 69  \w    147.00 172.00   0.50    0.50    --   94.60  61.00  41.33   50
 70  \w     77.00 171.00   0.50    0.50    --   94.60  39.00-160.96  188
 71  \w     71.00  96.00   0.50    0.50    --   94.60  61.00  60.00   50
 72  \w     13.00 119.00   0.50    0.50    --   94.60 -82.00-150.00  212
 73  \w      5.00 117.00   0.50    0.50    --   94.60 -82.00   0.00  224
 74  \w     86.00 111.00   0.50    0.50    --   94.60 -82.00  90.00   50
 75  \w    152.00 177.00   0.50    0.50    --   94.60  56.00  26.92   50
;
_diffrn_measurement_device         'four-circle diffractometer'
_diffrn_measurement_device_type    'XtaLAB AFC12 (RINC): Kappa single'
_diffrn_measurement_method         '\w scans'
_diffrn_orient_matrix_type        
 'CrysAlisPro convention (1999,Acta A55,543-557)'
_diffrn_orient_matrix_UB_11        -0.0374111000
_diffrn_orient_matrix_UB_12        0.0375750000
_diffrn_orient_matrix_UB_13        0.0461039000
_diffrn_orient_matrix_UB_21        0.0246030000
_diffrn_orient_matrix_UB_22        -0.0894851000
_diffrn_orient_matrix_UB_23        0.0204393000
_diffrn_orient_matrix_UB_31        0.2113403000
_diffrn_orient_matrix_UB_32        0.0170495000
_diffrn_orient_matrix_UB_33        0.0057864000
_diffrn_radiation_monochromator    graphite
_diffrn_radiation_probe            x-ray
_diffrn_radiation_type             CuK\a
_diffrn_radiation_wavelength       1.54184
_diffrn_source                     'fine-focus sealed X-ray tube'
_diffrn_source_type                'Enhance (Cu) X-ray Source'
_reflns_Friedel_coverage           0.754
_reflns_Friedel_fraction_full      1.000
_reflns_Friedel_fraction_max       0.991
_reflns_number_gt                  6740
_reflns_number_total               6833
_reflns_odcompleteness_completeness  99.97
_reflns_odcompleteness_iscentric   1
_reflns_odcompleteness_theta       66.97
_reflns_special_details
;
 Reflections were merged by SHELXL according to the crystal
 class for the calculation of statistics and refinement.
 
 _reflns_Friedel_fraction is defined as the number of unique
 Friedel pairs measured divided by the number that would be
 possible theoretically, ignoring centric projections and
 systematic absences.
;
_reflns_threshold_expression       'I > 2\s(I)'
_computing_cell_refinement         'CrysAlisPro 1.171.39.28b (Rigaku OD, 2015)'
_computing_data_collection         'CrysAlisPro 1.171.39.28b (Rigaku OD, 2015)'
_computing_data_reduction          'CrysAlisPro 1.171.39.28b (Rigaku OD, 2015)'
_computing_molecular_graphics      'Olex2 (Dolomanov et al., 2009)'
_computing_publication_material    'Olex2 (Dolomanov et al., 2009)'
_computing_structure_refinement    'XL (Sheldrick, 2008)'
_computing_structure_solution      'XM (Sheldrick, 2008)'
_refine_diff_density_max           0.363
_refine_diff_density_min           -0.279
_refine_diff_density_rms           0.047
_refine_ls_abs_structure_details
;
 Flack x determined using 2853 quotients [(I+)-(I-)]/[(I+)+(I-)]
 (Parsons, Flack and Wagner, Acta Cryst. B69 (2013) 249-259).
;
_refine_ls_abs_structure_Flack     0.05(4)
_refine_ls_extinction_coef         .
_refine_ls_extinction_method       none
_refine_ls_goodness_of_fit_ref     1.104
_refine_ls_hydrogen_treatment      constr
_refine_ls_matrix_type             full
_refine_ls_number_parameters       417
_refine_ls_number_reflns           6833
_refine_ls_number_restraints       0
_refine_ls_R_factor_all            0.0371
_refine_ls_R_factor_gt             0.0366
_refine_ls_restrained_S_all        1.104
_refine_ls_shift/su_max            0.002
_refine_ls_shift/su_mean           0.000
_refine_ls_structure_factor_coef   Fsqd
_refine_ls_weighting_details      
 'w=1/[\s^2^(Fo^2^)+(0.0401P)^2^+1.8219P] where P=(Fo^2^+2Fc^2^)/3'
_refine_ls_weighting_scheme        calc
_refine_ls_wR_factor_gt            0.0970
_refine_ls_wR_factor_ref           0.0973
_refine_special_details            ?
_olex2_refinement_description
;
1. Fixed Uiso
 At 1.2 times of:
  All C(H) groups, All C(H,H) groups, All N(H) groups
 At 1.5 times of:
  All C(H,H,H) groups, All O(H) groups
2.a Ternary CH refined with riding coordinates:
 C3(H3), C4(H4), C7(H7), C8(H8), C16(H16), C20(H20)
2.b Secondary CH2 refined with riding coordinates:
 C10(H10A,H10B), C15(H15A,H15B), C17(H17A,H17B), C19(H19A,H19B)
2.c Aromatic/amide H refined with riding coordinates:
 C1'(H1'), C4'(H4'), C5'(H5'), C6'(H6'), C7'(H7'), C13(H13), C14(H14),
 N1'(H1'A), N2(H2)
2.d Idealised Me refined as rotating group:
 C11(H11A,H11B,H11C), C12(H12A,H12B,H12C), C24(H24A,H24B,H24C), C27(H27A,H27B,
 H27C), C25(H25A,H25B,H25C), C26(H26A,H26B,H26C), C22(H22A,H22B,H22C)
2.e Idealised tetrahedral OH refined as rotating group:
 O2(H2A), O7(H7A), O8(H8A), O9(H9)
;
_atom_sites_solution_hydrogens     geom
_atom_sites_solution_primary       dual
_atom_sites_solution_secondary     ?
loop_
  _atom_site_label
  _atom_site_type_symbol
  _atom_site_fract_x
  _atom_site_fract_y
  _atom_site_fract_z
  _atom_site_U_iso_or_equiv
  _atom_site_adp_type
  _atom_site_occupancy
  _atom_site_site_symmetry_order
  _atom_site_calc_flag
  _atom_site_refinement_flags_posn
  _atom_site_refinement_flags_adp
  _atom_site_refinement_flags_occupancy
  _atom_site_disorder_assembly
  _atom_site_disorder_group
 C1 C 0.8861(3) 0.60405(14) 0.49079(7) 0.0154(4) Uani 1 1 d . . . . .
 C1' C 1.0387(4) 0.28269(15) 0.43873(8) 0.0205(5) Uani 1 1 d . . . . .
 H1' H 1.0151 0.2741 0.4685 0.025 Uiso 1 1 calc R . . . .
 C2' C 1.0873(3) 0.35945(15) 0.42027(8) 0.0180(5) Uani 1 1 d . . . . .
 C3 C 0.9720(3) 0.51204(14) 0.43251(7) 0.0172(5) Uani 1 1 d . . . . .
 H3 H 0.9805 0.5259 0.4011 0.021 Uiso 1 1 calc R . . . .
 C3' C 1.1141(3) 0.34312(14) 0.37415(7) 0.0170(4) Uani 1 1 d . . . . .
 C4 C 0.7643(3) 0.49011(14) 0.44422(7) 0.0153(4) Uani 1 1 d . . . . .
 H4 H 0.7539 0.4284 0.4494 0.018 Uiso 1 1 calc R . . . .
 C4' C 1.1738(4) 0.39343(15) 0.33850(8) 0.0219(5) Uani 1 1 d . . . . .
 H4' H 1.1985 0.4514 0.3423 0.026 Uiso 1 1 calc R . . . .
 C5 C 0.6411(3) 0.51411(14) 0.40569(7) 0.0170(4) Uani 1 1 d . . . . .
 C5' C 1.1953(4) 0.35536(16) 0.29773(8) 0.0259(5) Uani 1 1 d . . . . .
 H5' H 1.2346 0.3882 0.2739 0.031 Uiso 1 1 calc R . . . .
 C6 C 0.5355(3) 0.58491(14) 0.40497(7) 0.0169(4) Uani 1 1 d . . . . .
 C6' C 1.1587(4) 0.26778(17) 0.29172(8) 0.0266(6) Uani 1 1 d . . . . .
 H6' H 1.1755 0.2437 0.2640 0.032 Uiso 1 1 calc R . . . .
 C7 C 0.5190(3) 0.63910(13) 0.44618(7) 0.0150(4) Uani 1 1 d . . . . .
 H7 H 0.6210 0.6811 0.4467 0.018 Uiso 1 1 calc R . . . .
 C7' C 1.0987(4) 0.21673(15) 0.32585(8) 0.0219(5) Uani 1 1 d . . . . .
 H7' H 1.0734 0.1590 0.3216 0.026 Uiso 1 1 calc R . . . .
 C8 C 0.5311(3) 0.58282(14) 0.48777(7) 0.0144(4) Uani 1 1 d . . . . .
 H8 H 0.4371 0.5375 0.4846 0.017 Uiso 1 1 calc R . . . .
 C8' C 1.0771(3) 0.25491(14) 0.36715(8) 0.0174(5) Uani 1 1 d . . . . .
 C9 C 0.7268(3) 0.53848(14) 0.48844(7) 0.0150(4) Uani 1 1 d . . . . .
 C10 C 1.1167(4) 0.44286(15) 0.44365(8) 0.0195(5) Uani 1 1 d . . . . .
 H10A H 1.2405 0.4643 0.4364 0.023 Uiso 1 1 calc R . . . .
 H10B H 1.1137 0.4326 0.4752 0.023 Uiso 1 1 calc R . . . .
 C11 C 0.6552(4) 0.45168(16) 0.36770(8) 0.0220(5) Uani 1 1 d . . . . .
 H11A H 0.7813 0.4306 0.3656 0.033 Uiso 1 1 calc GR . . . .
 H11B H 0.6220 0.4801 0.3408 0.033 Uiso 1 1 calc GR . . . .
 H11C H 0.5711 0.4047 0.3726 0.033 Uiso 1 1 calc GR . . . .
 C12 C 0.4267(4) 0.61590(16) 0.36551(8) 0.0225(5) Uani 1 1 d . . . . .
 H12A H 0.4660 0.5850 0.3398 0.034 Uiso 1 1 calc GR . . . .
 H12B H 0.4494 0.6759 0.3613 0.034 Uiso 1 1 calc GR . . . .
 H12C H 0.2952 0.6066 0.3703 0.034 Uiso 1 1 calc GR . . . .
 C13 C 0.4784(3) 0.63385(13) 0.52801(7) 0.0155(4) Uani 1 1 d . . . . .
 H13 H 0.5470 0.6827 0.5347 0.019 Uiso 1 1 calc R . . . .
 C14 C 0.3378(3) 0.61170(15) 0.55428(7) 0.0159(4) Uani 1 1 d . . . . .
 H14 H 0.2771 0.5603 0.5483 0.019 Uiso 1 1 calc R . . . .
 C15 C 0.2689(3) 0.66276(15) 0.59275(7) 0.0186(5) Uani 1 1 d . . . . .
 H15A H 0.1391 0.6783 0.5875 0.022 Uiso 1 1 calc R . . . .
 H15B H 0.3409 0.7153 0.5944 0.022 Uiso 1 1 calc R . . . .
 C16 C 0.2816(4) 0.61671(15) 0.63744(7) 0.0191(5) Uani 1 1 d . . . . .
 H16 H 0.2159 0.5619 0.6350 0.023 Uiso 1 1 calc R . . . .
 C17 C 0.4859(4) 0.59869(16) 0.64981(8) 0.0229(5) Uani 1 1 d . . . . .
 H17A H 0.5575 0.6512 0.6475 0.027 Uiso 1 1 calc R . . . .
 H17B H 0.4913 0.5798 0.6802 0.027 Uiso 1 1 calc R . . . .
 C18 C 0.5747(4) 0.53115(15) 0.62065(8) 0.0203(5) Uani 1 1 d . . . . .
 C19 C 0.7656(3) 0.55243(15) 0.60175(8) 0.0201(5) Uani 1 1 d . . . . .
 H19A H 0.8533 0.5578 0.6260 0.024 Uiso 1 1 calc R . . . .
 H19B H 0.7575 0.6080 0.5876 0.024 Uiso 1 1 calc R . . . .
 C20 C 0.8472(4) 0.48966(14) 0.56874(8) 0.0191(5) Uani 1 1 d . . . . .
 H20 H 0.9697 0.5115 0.5594 0.023 Uiso 1 1 calc R . . . .
 C21 C 0.7282(3) 0.47364(14) 0.52711(7) 0.0162(4) Uani 1 1 d . . . . .
 C23 C 1.0116(4) 0.35865(16) 0.57532(8) 0.0244(5) Uani 1 1 d . . . . .
 C24 C 1.0256(4) 0.27595(16) 0.59973(9) 0.0270(6) Uani 1 1 d . . . . .
 H24A H 0.9827 0.2838 0.6294 0.040 Uiso 1 1 calc GR . . . .
 H24B H 1.1538 0.2572 0.6000 0.040 Uiso 1 1 calc GR . . . .
 H24C H 0.9494 0.2337 0.5854 0.040 Uiso 1 1 calc GR . . . .
 C27 C 0.1022(6) 0.3976(3) 0.70573(15) 0.0622(11) Uani 1 1 d . . . . .
 H27A H 0.0521 0.4227 0.6794 0.093 Uiso 1 1 calc GR . . . .
 H27B H 0.0093 0.3613 0.7190 0.093 Uiso 1 1 calc GR . . . .
 H27C H 0.2111 0.3642 0.6985 0.093 Uiso 1 1 calc GR . . . .
 C25 C 0.9525(5) 0.5968(2) 0.29008(11) 0.0441(8) Uani 1 1 d . . . . .
 H25A H 1.0270 0.6477 0.2872 0.066 Uiso 1 1 calc GR . . . .
 H25B H 0.9935 0.5651 0.3154 0.066 Uiso 1 1 calc GR . . . .
 H25C H 0.8231 0.6123 0.2936 0.066 Uiso 1 1 calc GR . . . .
 C26 C 0.7003(5) 0.3582(2) 0.25572(11) 0.0401(7) Uani 1 1 d . . . . .
 H26A H 0.7653 0.3246 0.2341 0.060 Uiso 1 1 calc GR . . . .
 H26B H 0.5820 0.3318 0.2624 0.060 Uiso 1 1 calc GR . . . .
 H26C H 0.7745 0.3617 0.2820 0.060 Uiso 1 1 calc GR . . . .
 C22 C 0.1850(4) 0.66975(17) 0.67305(8) 0.0265(6) Uani 1 1 d . . . . .
 H22A H 0.2441 0.7248 0.6750 0.040 Uiso 1 1 calc GR . . . .
 H22B H 0.1952 0.6409 0.7009 0.040 Uiso 1 1 calc GR . . . .
 H22C H 0.0551 0.6769 0.6657 0.040 Uiso 1 1 calc GR . . . .
 N1' N 1.0299(3) 0.22034(12) 0.40708(7) 0.0205(4) Uani 1 1 d . . . . .
 H1'A H 0.9994 0.1678 0.4116 0.025 Uiso 1 1 calc R . . . .
 N2 N 1.0074(3) 0.58935(12) 0.45835(6) 0.0176(4) Uani 1 1 d . . . . .
 H2 H 1.1002 0.6229 0.4530 0.021 Uiso 1 1 calc R . . . .
 O1 O 0.8999(2) 0.66177(10) 0.51858(5) 0.0191(3) Uani 1 1 d . . . . .
 O2 O 0.3428(2) 0.68322(10) 0.44476(5) 0.0165(3) Uani 1 1 d . . . . .
 H2A H 0.3493 0.7268 0.4597 0.025 Uiso 1 1 calc GR . . . .
 O3 O 0.4965(3) 0.46327(10) 0.61419(6) 0.0230(4) Uani 1 1 d . . . . .
 O4 O 0.6365(3) 0.40913(10) 0.52357(6) 0.0230(4) Uani 1 1 d . . . . .
 O5 O 0.8773(2) 0.41051(10) 0.59194(5) 0.0206(3) Uani 1 1 d . . . . .
 O6 O 1.1066(4) 0.37824(15) 0.54444(8) 0.0505(7) Uani 1 1 d . . . . .
 O7 O 0.1526(4) 0.46288(15) 0.73562(10) 0.0510(6) Uani 1 1 d . . . . .
 H7A H 0.2115 0.4421 0.7562 0.076 Uiso 1 1 calc GR . . . .
 O8 O 0.9730(3) 0.54588(14) 0.25183(8) 0.0392(5) Uani 1 1 d . . . . .
 H8A H 0.8833 0.5133 0.2497 0.059 Uiso 1 1 calc GR . . . .
 O9 O 0.6690(3) 0.44206(15) 0.23881(10) 0.0486(6) Uani 1 1 d . . . . .
 H9 H 0.5626 0.4576 0.2452 0.073 Uiso 1 1 calc GR . . . .

loop_
  _atom_site_aniso_label
  _atom_site_aniso_U_11
  _atom_site_aniso_U_22
  _atom_site_aniso_U_33
  _atom_site_aniso_U_23
  _atom_site_aniso_U_13
  _atom_site_aniso_U_12
 C1 0.0156(11) 0.0107(9) 0.0200(10) -0.0003(8) -0.0012(9) 0.0010(9)
 C1' 0.0218(12) 0.0190(11) 0.0209(11) -0.0003(9) 0.0011(9) 0.0032(9)
 C2' 0.0165(11) 0.0168(11) 0.0207(11) -0.0026(9) -0.0003(9) 0.0019(9)
 C3 0.0171(12) 0.0149(10) 0.0197(10) -0.0028(8) 0.0010(9) -0.0015(9)
 C3' 0.0156(11) 0.0157(10) 0.0196(11) -0.0009(8) -0.0007(9) 0.0016(9)
 C4 0.0149(11) 0.0111(10) 0.0199(10) -0.0030(8) 0.0016(9) -0.0017(8)
 C4' 0.0235(13) 0.0163(11) 0.0258(12) -0.0008(9) 0.0026(10) 0.0002(10)
 C5 0.0151(11) 0.0168(10) 0.0190(11) -0.0021(9) 0.0021(9) -0.0025(9)
 C5' 0.0295(14) 0.0249(12) 0.0232(12) 0.0018(10) 0.0067(10) -0.0007(11)
 C6 0.0158(11) 0.0173(10) 0.0177(10) -0.0006(8) 0.0016(9) -0.0034(9)
 C6' 0.0350(15) 0.0253(12) 0.0195(11) -0.0055(10) 0.0023(10) 0.0039(11)
 C7 0.0129(10) 0.0122(9) 0.0198(10) 0.0006(8) 0.0009(9) -0.0010(8)
 C7' 0.0240(13) 0.0166(11) 0.0250(12) -0.0048(9) -0.0031(10) 0.0017(10)
 C8 0.0136(10) 0.0124(9) 0.0173(10) -0.0004(8) 0.0006(8) -0.0004(8)
 C8' 0.0146(11) 0.0159(10) 0.0217(11) -0.0006(9) -0.0009(9) 0.0018(8)
 C9 0.0145(11) 0.0124(9) 0.0181(10) -0.0009(8) 0.0010(8) -0.0021(9)
 C10 0.0189(12) 0.0188(11) 0.0209(11) -0.0047(9) -0.0006(9) 0.0000(9)
 C11 0.0219(12) 0.0213(11) 0.0227(11) -0.0069(9) -0.0003(9) 0.0000(10)
 C12 0.0249(13) 0.0224(11) 0.0201(11) -0.0013(9) -0.0014(10) 0.0016(10)
 C13 0.0157(11) 0.0129(9) 0.0178(10) -0.0014(8) -0.0014(8) 0.0011(8)
 C14 0.0155(11) 0.0160(10) 0.0161(10) 0.0006(8) -0.0016(8) 0.0005(9)
 C15 0.0183(11) 0.0200(11) 0.0174(11) 0.0007(9) 0.0006(9) 0.0029(9)
 C16 0.0208(12) 0.0187(11) 0.0177(10) -0.0005(9) 0.0013(9) 0.0022(9)
 C17 0.0256(13) 0.0231(12) 0.0199(11) -0.0024(9) -0.0055(10) 0.0055(11)
 C18 0.0226(12) 0.0186(11) 0.0198(11) 0.0013(9) -0.0046(9) 0.0043(10)
 C19 0.0202(12) 0.0169(10) 0.0232(11) -0.0004(9) -0.0056(9) 0.0005(9)
 C20 0.0195(12) 0.0157(11) 0.0221(11) 0.0042(9) -0.0033(9) -0.0005(9)
 C21 0.0136(10) 0.0140(10) 0.0209(11) -0.0009(8) 0.0009(8) 0.0020(9)
 C23 0.0228(13) 0.0249(12) 0.0255(12) 0.0018(10) 0.0005(10) 0.0058(11)
 C24 0.0216(13) 0.0226(12) 0.0367(14) 0.0060(11) 0.0008(11) 0.0049(10)
 C27 0.048(2) 0.046(2) 0.093(3) -0.026(2) -0.019(2) -0.0003(18)
 C25 0.049(2) 0.0378(16) 0.0460(18) 0.0089(14) -0.0004(15) 0.0087(15)
 C26 0.0336(17) 0.0416(17) 0.0451(17) -0.0029(14) -0.0038(14) 0.0040(14)
 C22 0.0338(15) 0.0283(13) 0.0175(11) -0.0006(10) 0.0029(10) 0.0084(11)
 N1' 0.0251(11) 0.0124(9) 0.0241(10) 0.0002(8) 0.0016(9) 0.0003(8)
 N2 0.0150(10) 0.0132(8) 0.0247(9) -0.0025(7) 0.0028(8) -0.0039(8)
 O1 0.0192(8) 0.0141(7) 0.0241(8) -0.0043(6) -0.0005(7) -0.0006(6)
 O2 0.0151(8) 0.0127(7) 0.0218(8) -0.0022(6) -0.0006(6) 0.0014(6)
 O3 0.0249(9) 0.0156(8) 0.0284(9) 0.0009(6) 0.0012(7) 0.0027(7)
 O4 0.0281(9) 0.0162(8) 0.0246(8) 0.0021(7) -0.0019(7) -0.0062(7)
 O5 0.0194(8) 0.0173(8) 0.0252(8) 0.0048(6) 0.0000(7) 0.0042(7)
 O6 0.0657(16) 0.0408(12) 0.0449(13) 0.0198(10) 0.0300(12) 0.0270(12)
 O7 0.0371(13) 0.0391(12) 0.0766(18) -0.0153(12) -0.0184(12) 0.0021(11)
 O8 0.0321(12) 0.0364(11) 0.0491(12) 0.0062(9) 0.0024(10) -0.0046(9)
 O9 0.0294(12) 0.0422(13) 0.0743(17) 0.0035(12) -0.0027(12) 0.0032(10)

_geom_special_details
;
 All esds (except the esd in the dihedral angle between two l.s. planes)
 are estimated using the full covariance matrix.  The cell esds are taken
 into account individually in the estimation of esds in distances, angles
 and torsion angles; correlations between esds in cell parameters are only
 used when they are defined by crystal symmetry.  An approximate (isotropic)
 treatment of cell esds is used for estimating esds involving l.s. planes.
;
loop_
  _geom_bond_atom_site_label_1
  _geom_bond_atom_site_label_2
  _geom_bond_distance
  _geom_bond_site_symmetry_2
  _geom_bond_publ_flag
 C1 C9 1.532(3) . ?
 C1 N2 1.331(3) . ?
 C1 O1 1.239(3) . ?
 C1' H1' 0.9300 . ?
 C1' C2' 1.369(3) . ?
 C1' N1' 1.370(3) . ?
 C2' C3' 1.435(3) . ?
 C2' C10 1.499(3) . ?
 C3 H3 0.9800 . ?
 C3 C4 1.561(3) . ?
 C3 C10 1.533(3) . ?
 C3 N2 1.463(3) . ?
 C3' C4' 1.404(3) . ?
 C3' C8' 1.420(3) . ?
 C4 H4 0.9800 . ?
 C4 C5 1.510(3) . ?
 C4 C9 1.563(3) . ?
 C4' H4' 0.9300 . ?
 C4' C5' 1.381(3) . ?
 C5 C6 1.339(3) . ?
 C5 C11 1.514(3) . ?
 C5' H5' 0.9300 . ?
 C5' C6' 1.406(4) . ?
 C6 C7 1.515(3) . ?
 C6 C12 1.507(3) . ?
 C6' H6' 0.9300 . ?
 C6' C7' 1.376(4) . ?
 C7 H7 0.9800 . ?
 C7 C8 1.541(3) . ?
 C7 O2 1.434(3) . ?
 C7' H7' 0.9300 . ?
 C7' C8' 1.397(3) . ?
 C8 H8 0.9800 . ?
 C8 C9 1.558(3) . ?
 C8 C13 1.506(3) . ?
 C8' N1' 1.369(3) . ?
 C9 C21 1.551(3) . ?
 C10 H10A 0.9700 . ?
 C10 H10B 0.9700 . ?
 C11 H11A 0.9600 . ?
 C11 H11B 0.9600 . ?
 C11 H11C 0.9600 . ?
 C12 H12A 0.9600 . ?
 C12 H12B 0.9600 . ?
 C12 H12C 0.9600 . ?
 C13 H13 0.9300 . ?
 C13 C14 1.327(3) . ?
 C14 H14 0.9300 . ?
 C14 C15 1.497(3) . ?
 C15 H15A 0.9700 . ?
 C15 H15B 0.9700 . ?
 C15 C16 1.538(3) . ?
 C16 H16 0.9800 . ?
 C16 C17 1.531(3) . ?
 C16 C22 1.527(3) . ?
 C17 H17A 0.9700 . ?
 C17 H17B 0.9700 . ?
 C17 C18 1.516(3) . ?
 C18 C19 1.514(4) . ?
 C18 O3 1.215(3) . ?
 C19 H19A 0.9700 . ?
 C19 H19B 0.9700 . ?
 C19 C20 1.518(3) . ?
 C20 H20 0.9800 . ?
 C20 C21 1.542(3) . ?
 C20 O5 1.440(3) . ?
 C21 O4 1.207(3) . ?
 C23 C24 1.493(3) . ?
 C23 O5 1.353(3) . ?
 C23 O6 1.196(3) . ?
 C24 H24A 0.9600 . ?
 C24 H24B 0.9600 . ?
 C24 H24C 0.9600 . ?
 C27 H27A 0.9600 . ?
 C27 H27B 0.9600 . ?
 C27 H27C 0.9600 . ?
 C27 O7 1.412(4) . ?
 C25 H25A 0.9600 . ?
 C25 H25B 0.9600 . ?
 C25 H25C 0.9600 . ?
 C25 O8 1.415(4) . ?
 C26 H26A 0.9600 . ?
 C26 H26B 0.9600 . ?
 C26 H26C 0.9600 . ?
 C26 O9 1.426(4) . ?
 C22 H22A 0.9600 . ?
 C22 H22B 0.9600 . ?
 C22 H22C 0.9600 . ?
 N1' H1'A 0.8600 . ?
 N2 H2 0.8600 . ?
 O2 H2A 0.8200 . ?
 O7 H7A 0.8200 . ?
 O8 H8A 0.8200 . ?
 O9 H9 0.8200 . ?

loop_
  _geom_angle_atom_site_label_1
  _geom_angle_atom_site_label_2
  _geom_angle_atom_site_label_3
  _geom_angle
  _geom_angle_site_symmetry_1
  _geom_angle_site_symmetry_3
  _geom_angle_publ_flag
 N2 C1 C9 109.40(18) . . ?
 O1 C1 C9 125.3(2) . . ?
 O1 C1 N2 125.3(2) . . ?
 C2' C1' H1' 124.8 . . ?
 C2' C1' N1' 110.4(2) . . ?
 N1' C1' H1' 124.8 . . ?
 C1' C2' C3' 106.1(2) . . ?
 C1' C2' C10 127.2(2) . . ?
 C3' C2' C10 126.7(2) . . ?
 C4 C3 H3 109.2 . . ?
 C10 C3 H3 109.2 . . ?
 C10 C3 C4 115.69(19) . . ?
 N2 C3 H3 109.2 . . ?
 N2 C3 C4 102.91(18) . . ?
 N2 C3 C10 110.39(19) . . ?
 C4' C3' C2' 133.8(2) . . ?
 C4' C3' C8' 119.0(2) . . ?
 C8' C3' C2' 107.1(2) . . ?
 C3 C4 H4 109.0 . . ?
 C3 C4 C9 104.58(17) . . ?
 C5 C4 C3 108.72(18) . . ?
 C5 C4 H4 109.0 . . ?
 C5 C4 C9 116.42(18) . . ?
 C9 C4 H4 109.0 . . ?
 C3' C4' H4' 120.6 . . ?
 C5' C4' C3' 118.9(2) . . ?
 C5' C4' H4' 120.6 . . ?
 C4 C5 C11 113.0(2) . . ?
 C6 C5 C4 123.0(2) . . ?
 C6 C5 C11 123.9(2) . . ?
 C4' C5' H5' 119.5 . . ?
 C4' C5' C6' 121.0(2) . . ?
 C6' C5' H5' 119.5 . . ?
 C5 C6 C7 119.5(2) . . ?
 C5 C6 C12 124.6(2) . . ?
 C12 C6 C7 115.86(19) . . ?
 C5' C6' H6' 119.2 . . ?
 C7' C6' C5' 121.7(2) . . ?
 C7' C6' H6' 119.2 . . ?
 C6 C7 H7 109.2 . . ?
 C6 C7 C8 110.64(17) . . ?
 C8 C7 H7 109.2 . . ?
 O2 C7 C6 108.18(18) . . ?
 O2 C7 H7 109.2 . . ?
 O2 C7 C8 110.39(17) . . ?
 C6' C7' H7' 121.2 . . ?
 C6' C7' C8' 117.5(2) . . ?
 C8' C7' H7' 121.2 . . ?
 C7 C8 H8 107.0 . . ?
 C7 C8 C9 108.35(17) . . ?
 C9 C8 H8 107.0 . . ?
 C13 C8 C7 110.34(17) . . ?
 C13 C8 H8 107.0 . . ?
 C13 C8 C9 116.65(18) . . ?
 C7' C8' C3' 121.9(2) . . ?
 N1' C8' C3' 107.2(2) . . ?
 N1' C8' C7' 130.7(2) . . ?
 C1 C9 C4 103.70(17) . . ?
 C1 C9 C8 111.53(17) . . ?
 C1 C9 C21 113.41(18) . . ?
 C8 C9 C4 110.94(18) . . ?
 C21 C9 C4 109.41(17) . . ?
 C21 C9 C8 107.84(17) . . ?
 C2' C10 C3 114.53(19) . . ?
 C2' C10 H10A 108.6 . . ?
 C2' C10 H10B 108.6 . . ?
 C3 C10 H10A 108.6 . . ?
 C3 C10 H10B 108.6 . . ?
 H10A C10 H10B 107.6 . . ?
 C5 C11 H11A 109.5 . . ?
 C5 C11 H11B 109.5 . . ?
 C5 C11 H11C 109.5 . . ?
 H11A C11 H11B 109.5 . . ?
 H11A C11 H11C 109.5 . . ?
 H11B C11 H11C 109.5 . . ?
 C6 C12 H12A 109.5 . . ?
 C6 C12 H12B 109.5 . . ?
 C6 C12 H12C 109.5 . . ?
 H12A C12 H12B 109.5 . . ?
 H12A C12 H12C 109.5 . . ?
 H12B C12 H12C 109.5 . . ?
 C8 C13 H13 118.7 . . ?
 C14 C13 C8 122.5(2) . . ?
 C14 C13 H13 118.7 . . ?
 C13 C14 H14 117.4 . . ?
 C13 C14 C15 125.3(2) . . ?
 C15 C14 H14 117.4 . . ?
 C14 C15 H15A 108.6 . . ?
 C14 C15 H15B 108.6 . . ?
 C14 C15 C16 114.74(19) . . ?
 H15A C15 H15B 107.6 . . ?
 C16 C15 H15A 108.6 . . ?
 C16 C15 H15B 108.6 . . ?
 C15 C16 H16 108.3 . . ?
 C17 C16 C15 111.0(2) . . ?
 C17 C16 H16 108.3 . . ?
 C22 C16 C15 110.07(19) . . ?
 C22 C16 H16 108.3 . . ?
 C22 C16 C17 110.8(2) . . ?
 C16 C17 H17A 109.1 . . ?
 C16 C17 H17B 109.1 . . ?
 H17A C17 H17B 107.8 . . ?
 C18 C17 C16 112.5(2) . . ?
 C18 C17 H17A 109.1 . . ?
 C18 C17 H17B 109.1 . . ?
 C19 C18 C17 116.3(2) . . ?
 O3 C18 C17 120.7(2) . . ?
 O3 C18 C19 122.9(2) . . ?
 C18 C19 H19A 108.1 . . ?
 C18 C19 H19B 108.1 . . ?
 C18 C19 C20 116.9(2) . . ?
 H19A C19 H19B 107.3 . . ?
 C20 C19 H19A 108.1 . . ?
 C20 C19 H19B 108.1 . . ?
 C19 C20 H20 108.0 . . ?
 C19 C20 C21 115.8(2) . . ?
 C21 C20 H20 108.0 . . ?
 O5 C20 C19 106.86(19) . . ?
 O5 C20 H20 108.0 . . ?
 O5 C20 C21 110.05(18) . . ?
 C20 C21 C9 121.16(19) . . ?
 O4 C21 C9 118.4(2) . . ?
 O4 C21 C20 120.5(2) . . ?
 O5 C23 C24 112.4(2) . . ?
 O6 C23 C24 124.9(2) . . ?
 O6 C23 O5 122.7(2) . . ?
 C23 C24 H24A 109.5 . . ?
 C23 C24 H24B 109.5 . . ?
 C23 C24 H24C 109.5 . . ?
 H24A C24 H24B 109.5 . . ?
 H24A C24 H24C 109.5 . . ?
 H24B C24 H24C 109.5 . . ?
 H27A C27 H27B 109.5 . . ?
 H27A C27 H27C 109.5 . . ?
 H27B C27 H27C 109.5 . . ?
 O7 C27 H27A 109.5 . . ?
 O7 C27 H27B 109.5 . . ?
 O7 C27 H27C 109.5 . . ?
 H25A C25 H25B 109.5 . . ?
 H25A C25 H25C 109.5 . . ?
 H25B C25 H25C 109.5 . . ?
 O8 C25 H25A 109.5 . . ?
 O8 C25 H25B 109.5 . . ?
 O8 C25 H25C 109.5 . . ?
 H26A C26 H26B 109.5 . . ?
 H26A C26 H26C 109.5 . . ?
 H26B C26 H26C 109.5 . . ?
 O9 C26 H26A 109.5 . . ?
 O9 C26 H26B 109.5 . . ?
 O9 C26 H26C 109.5 . . ?
 C16 C22 H22A 109.5 . . ?
 C16 C22 H22B 109.5 . . ?
 C16 C22 H22C 109.5 . . ?
 H22A C22 H22B 109.5 . . ?
 H22A C22 H22C 109.5 . . ?
 H22B C22 H22C 109.5 . . ?
 C1' N1' H1'A 125.4 . . ?
 C8' N1' C1' 109.18(19) . . ?
 C8' N1' H1'A 125.4 . . ?
 C1 N2 C3 115.26(19) . . ?
 C1 N2 H2 122.4 . . ?
 C3 N2 H2 122.4 . . ?
 C7 O2 H2A 109.5 . . ?
 C23 O5 C20 116.00(19) . . ?
 C27 O7 H7A 109.5 . . ?
 C25 O8 H8A 109.5 . . ?
 C26 O9 H9 109.5 . . ?

loop_
  _geom_hbond_atom_site_label_D
  _geom_hbond_atom_site_label_H
  _geom_hbond_atom_site_label_A
  _geom_hbond_distance_DH
  _geom_hbond_distance_HA
  _geom_hbond_distance_DA
  _geom_hbond_angle_DHA
  _geom_hbond_site_symmetry_A
 N2 H2 O2 0.86 1.99 2.836(3) 169.6 1_655
 O2 H2A O1 0.82 1.90 2.698(2) 165.0 3_466
 O8 H8A O9 0.82 1.92 2.737(3) 174.0 .
 O9 H9 O7 0.82 2.00 2.734(3) 149.6 2_564

loop_
  _geom_torsion_atom_site_label_1
  _geom_torsion_atom_site_label_2
  _geom_torsion_atom_site_label_3
  _geom_torsion_atom_site_label_4
  _geom_torsion
  _geom_torsion_site_symmetry_1
  _geom_torsion_site_symmetry_2
  _geom_torsion_site_symmetry_3
  _geom_torsion_site_symmetry_4
  _geom_torsion_publ_flag
 C1 C9 C21 C20 14.5(3) . . . . ?
 C1 C9 C21 O4 -164.1(2) . . . . ?
 C1' C2' C3' C4' -175.9(3) . . . . ?
 C1' C2' C3' C8' 0.6(3) . . . . ?
 C1' C2' C10 C3 -113.4(3) . . . . ?
 C2' C1' N1' C8' 1.4(3) . . . . ?
 C2' C3' C4' C5' 176.0(3) . . . . ?
 C2' C3' C8' C7' -177.1(2) . . . . ?
 C2' C3' C8' N1' 0.2(3) . . . . ?
 C3 C4 C5 C6 -102.6(2) . . . . ?
 C3 C4 C5 C11 75.4(2) . . . . ?
 C3 C4 C9 C1 17.0(2) . . . . ?
 C3 C4 C9 C8 136.80(18) . . . . ?
 C3 C4 C9 C21 -104.3(2) . . . . ?
 C3' C2' C10 C3 70.1(3) . . . . ?
 C3' C4' C5' C6' -0.1(4) . . . . ?
 C3' C8' N1' C1' -1.0(3) . . . . ?
 C4 C3 C10 C2' 61.1(3) . . . . ?
 C4 C3 N2 C1 17.0(2) . . . . ?
 C4 C5 C6 C7 -7.3(3) . . . . ?
 C4 C5 C6 C12 173.3(2) . . . . ?
 C4 C9 C21 C20 129.7(2) . . . . ?
 C4 C9 C21 O4 -48.9(3) . . . . ?
 C4' C3' C8' C7' 0.1(4) . . . . ?
 C4' C3' C8' N1' 177.4(2) . . . . ?
 C4' C5' C6' C7' 0.6(4) . . . . ?
 C5 C4 C9 C1 -103.0(2) . . . . ?
 C5 C4 C9 C8 16.8(3) . . . . ?
 C5 C4 C9 C21 135.7(2) . . . . ?
 C5 C6 C7 C8 -32.0(3) . . . . ?
 C5 C6 C7 O2 -153.1(2) . . . . ?
 C5' C6' C7' C8' -0.7(4) . . . . ?
 C6 C7 C8 C9 61.9(2) . . . . ?
 C6 C7 C8 C13 -169.28(19) . . . . ?
 C6' C7' C8' C3' 0.4(4) . . . . ?
 C6' C7' C8' N1' -176.2(3) . . . . ?
 C7 C8 C9 C1 61.7(2) . . . . ?
 C7 C8 C9 C4 -53.3(2) . . . . ?
 C7 C8 C9 C21 -173.10(17) . . . . ?
 C7 C8 C13 C14 121.4(2) . . . . ?
 C7' C8' N1' C1' 176.0(3) . . . . ?
 C8 C9 C21 C20 -109.5(2) . . . . ?
 C8 C9 C21 O4 71.9(2) . . . . ?
 C8 C13 C14 C15 -175.2(2) . . . . ?
 C8' C3' C4' C5' -0.2(4) . . . . ?
 C9 C1 N2 C3 -6.2(3) . . . . ?
 C9 C4 C5 C6 15.1(3) . . . . ?
 C9 C4 C5 C11 -166.91(19) . . . . ?
 C9 C8 C13 C14 -114.4(2) . . . . ?
 C10 C2' C3' C4' 1.1(5) . . . . ?
 C10 C2' C3' C8' 177.7(2) . . . . ?
 C10 C3 C4 C5 -134.55(19) . . . . ?
 C10 C3 C4 C9 100.4(2) . . . . ?
 C10 C3 N2 C1 -107.0(2) . . . . ?
 C11 C5 C6 C7 174.9(2) . . . . ?
 C11 C5 C6 C12 -4.5(4) . . . . ?
 C12 C6 C7 C8 147.4(2) . . . . ?
 C12 C6 C7 O2 26.4(3) . . . . ?
 C13 C8 C9 C1 -63.4(2) . . . . ?
 C13 C8 C9 C4 -178.49(18) . . . . ?
 C13 C8 C9 C21 61.7(2) . . . . ?
 C13 C14 C15 C16 -119.5(3) . . . . ?
 C14 C15 C16 C17 64.2(3) . . . . ?
 C14 C15 C16 C22 -172.7(2) . . . . ?
 C15 C16 C17 C18 -69.6(3) . . . . ?
 C16 C17 C18 C19 131.9(2) . . . . ?
 C16 C17 C18 O3 -49.9(3) . . . . ?
 C17 C18 C19 C20 -173.8(2) . . . . ?
 C18 C19 C20 C21 58.8(3) . . . . ?
 C18 C19 C20 O5 -64.2(3) . . . . ?
 C19 C20 C21 C9 78.7(3) . . . . ?
 C19 C20 C21 O4 -102.7(3) . . . . ?
 C19 C20 O5 C23 -154.7(2) . . . . ?
 C21 C20 O5 C23 78.9(3) . . . . ?
 C24 C23 O5 C20 -176.6(2) . . . . ?
 C22 C16 C17 C18 167.8(2) . . . . ?
 N1' C1' C2' C3' -1.3(3) . . . . ?
 N1' C1' C2' C10 -178.3(2) . . . . ?
 N2 C1 C9 C4 -7.5(2) . . . . ?
 N2 C1 C9 C8 -127.0(2) . . . . ?
 N2 C1 C9 C21 111.0(2) . . . . ?
 N2 C3 C4 C5 105.0(2) . . . . ?
 N2 C3 C4 C9 -20.0(2) . . . . ?
 N2 C3 C10 C2' 177.43(19) . . . . ?
 O1 C1 C9 C4 172.5(2) . . . . ?
 O1 C1 C9 C8 53.1(3) . . . . ?
 O1 C1 C9 C21 -68.9(3) . . . . ?
 O1 C1 N2 C3 173.8(2) . . . . ?
 O2 C7 C8 C9 -178.39(16) . . . . ?
 O2 C7 C8 C13 -49.6(2) . . . . ?
 O3 C18 C19 C20 8.1(3) . . . . ?
 O5 C20 C21 C9 -160.00(19) . . . . ?
 O5 C20 C21 O4 18.5(3) . . . . ?
 O6 C23 O5 C20 3.2(4) . . . . ?

loop_
  _refln_index_h
  _refln_index_k
  _refln_index_l
  _refln_F_squared_meas
  _refln_F_squared_sigma
  _refln_scale_group_code
 0 0 -2 471705 21808.3 12
 0 0 -2 469049 21810.6 1
 0 0 -3 161.631 42.5217 12
 0 0 3 151.205 46.9414 3
 0 0 3 160.956 41.9068 12
 0 0 3 160.698 46.5803 1
 0 0 4 421.928 70.6003 1
 0 0 4 631.634 61.1202 9
 0 0 -4 463.623 74.335 3
 0 0 4 515.284 73.0059 3
 0 0 -4 413.911 62.5754 12
 0 0 4 574.912 59.1909 12
 0 0 -4 610.601 66.3825 1
 0 0 5 640.455 68.9071 9
 0 0 -5 408.828 80.9763 3
 0 0 5 318.166 64.0203 12
 0 0 5 415.052 72.1565 3
 0 0 -5 383.761 76.2867 1
 0 0 5 398.944 70.9847 1
 0 0 6 447429 19673.7 3
 0 0 6 457354 19664.7 9
 0 0 6 452865 19672.8 1
 0 0 -6 433561 19669.8 1
 0 0 -6 438969 19674.3 3
 0 0 6 469453 19661.4 12
 0 0 -7 1041.7 103.931 1
 0 0 7 913.137 117.003 1
 0 0 -7 720.211 109.995 3
 0 0 7 699.259 106.087 3
 0 0 7 963.434 88.2539 12
 0 0 7 1146.02 107.291 9
 0 0 8 10856.3 513.374 9
 0 0 -8 10244 521.131 1
 0 0 8 10918.2 526.616 3
 0 0 8 10907.1 525.643 1
 0 0 -8 10629.9 528.837 3
 0 0 8 10787.6 506.004 12
 0 0 9 53.8398 61.4871 12
 0 0 9 118.057 77.987 3
 0 0 9 78.6118 88.3078 1
 0 0 9 67.3017 63.0301 9
 0 0 -9 75.484 83.2511 1
 0 0 10 53390.2 2441.88 1
 0 0 10 51431.2 2438.64 3
 0 0 10 54274 2416.9 12
 0 0 10 56441.2 2429.77 9
 0 0 -10 57126.1 2455.16 8
 0 0 -10 54820.6 2438.86 1
 0 0 11 -25.106 56.3607 12
 0 0 11 -22.4138 75.7913 3
 0 0 -11 25.6294 89.0857 8
 0 0 -11 55.3257 81.3536 1
 0 0 11 63.0568 62.4993 9
 0 0 11 80.5797 79.3071 1
 0 0 12 641.018 89.227 9
 0 0 12 661.22 80.3163 12
 0 0 -12 727.514 126.727 2
 0 0 -12 700.194 103.16 1
 0 0 12 471.86 95.7026 3
 0 0 -12 509.231 105.646 8
 0 0 12 524.663 102.331 1
 0 0 -13 -10.2607 74.2213 1
 0 0 13 54.6812 85.0109 1
 0 0 13 51.381 64.5139 9
 0 0 -13 6.22214 94.0386 8
 0 0 13 32.5 54.826 12
 0 0 13 43.8923 73.2712 3
 0 0 -13 86.8819 83.8936 2
 0 0 -14 11253.2 568.313 55
 0 0 14 10834.2 563.846 3
 0 0 14 10444.3 563.754 1
 0 0 -14 11429.1 583.645 8
 0 0 -14 10662.4 556.763 65
 0 0 -14 10162.4 553.52 1
 0 0 14 10439.1 550.985 70
 0 0 -14 10828.9 576.496 2
 0 0 14 10695.3 541.934 9
 0 0 -14 10178.8 562.448 61
 0 0 -14 10991.6 561.597 39
 0 0 14 10661.3 531.578 22
 0 0 14 10365.3 521.465 12
 0 0 15 46.3674 74.1256 3
 0 0 15 13.1429 85.5369 1
 0 0 -15 54.7323 73.8152 1
 0 0 15 -66.9996 67.3758 9
 0 0 15 50.8915 68.6783 56
 0 0 15 4.16243 83.3248 22
 0 0 -15 59.3367 93.9914 8
 0 0 -15 48.6024 76.7791 18
 0 0 -15 13.2451 70.9932 55
 0 0 15 -7.33199 50.7362 12
 0 0 -15 54.2587 73.1708 61
 0 0 15 38.9779 81.945 70
 0 0 -15 6.70365 71.4006 19
 0 0 -15 -24.9726 70.6821 39
 0 0 -15 37.4509 66.4819 65
 0 0 15 -26.9058 83.3619 34
 0 0 -15 -37.2504 92.6612 2
 0 0 16 3335.8 234.986 22
 0 0 16 3925.02 233.715 24
 0 0 16 3445.4 254.024 70
 0 0 -16 4144.37 285.904 8
 0 0 16 3406.34 257.655 3
 0 0 16 3502.26 242.086 9
 0 0 -16 3667.59 268.494 18
 0 0 -16 3464.52 261.784 61
 0 0 -16 3820.71 260.719 65
 0 0 16 3723.12 235.6 56
 0 0 -16 3811.78 269.633 19
 0 0 -16 3609.89 278.084 2
 0 0 -16 3772.69 264.185 39
 0 0 16 3280.46 223.859 34
 0 0 -16 3718.31 266.175 55
 0 0 16 3350.47 216.512 12
 0 0 -16 3503.17 254.338 1
 0 0 16 3414.2 260.456 1
 0 0 17 16.0191 65.4008 23
 0 0 -17 40.738 89.007 18
 0 0 -17 8.86063 83.3095 2
 0 0 -17 8.72885 83.4271 8
 0 0 -17 -42.7283 75.3579 1
 0 0 17 14.0527 64.0778 24
 0 0 -17 55.1046 84.9292 19
 0 0 17 11.4709 69.2704 73
 0 0 -17 31.1381 79.6191 55
 0 0 -17 7.35337 73.6037 39
 0 0 17 -88.2471 98.2256 34
 0 0 17 77.3338 53.6705 12
 0 0 17 93.703 86.3504 1
 0 0 17 -29.6729 90.6415 22
 0 0 17 -5.975 72.5266 32
 0 0 -17 -13.0962 67.4445 66
 0 0 17 73.7657 67.5684 9
 0 0 17 75.1934 77.6853 56
 0 0 -17 66.1904 84.2173 65
 0 0 17 -31.7418 77.058 3
 0 0 17 -19.714 92.677 70
 0 0 -17 15.9476 79.8135 61
 0 0 18 7770.59 458.119 70
 0 0 -18 7258.4 439.349 66
 0 0 18 7033.54 460.223 3
 0 0 18 8308.44 446.27 32
 0 0 18 7106.74 425.089 22
 0 0 -18 7740.19 469.52 61
 0 0 -18 7967.01 466.296 65
 0 0 -18 8126.67 484.885 8
 0 0 -18 7952.05 462.696 39
 0 0 18 7948.94 427.363 24
 0 0 -18 7746.91 469.329 19
 0 0 18 7369.21 430.645 73
 0 0 -18 8136.48 460.814 1
 0 0 -18 7928.23 477.333 18
 0 0 -18 7738.62 468.863 55
 0 0 18 8308.18 415.828 23
 0 0 18 7811.64 429.777 56
 0 0 18 6978.07 458.721 1
 0 0 -19 65.8299 73.4072 1
 0 0 -19 37.8337 96.7444 18
 0 0 19 -27.7942 68.1839 23
 0 0 19 55.0841 79.59 1
 0 0 19 88.6067 86.3472 56
 0 0 -19 -9.03995 89.8232 55
 0 0 19 154.329 111.617 70
 0 0 19 -20.5217 86.2964 32
 0 0 19 5.43329 71.3458 24
 0 0 -19 85.6515 91.8259 65
 0 0 -19 46.3579 90.0385 61
 0 0 -19 18.2784 94.7873 19
 0 0 -19 22.0915 70.3906 66
 0 0 20 17600.7 843.46 56
 0 0 20 17139.3 873.893 70
 0 0 20 17027.6 817.528 23
 0 0 -20 16694.1 890.356 61
 0 0 20 15439.4 842.22 32
 0 0 -20 17644 895.545 19
 0 0 -20 15784.6 849.454 66
 0 0 -20 17136.1 885.001 65
 0 0 20 16148.6 829.404 24
 0 0 -20 18240 903.645 18
 0 0 21 61.589 87.6639 32
 0 0 -21 -75.8378 121.952 18
 0 0 21 37.474 78.7887 24
 0 0 -21 -39.3281 106.744 65
 0 0 21 20.7436 94.9576 56
 0 0 21 -26.9829 120.092 70
 0 0 -21 73.225 106.991 19
 0 0 -21 32.3819 81.6276 66
 0 0 -21 148.933 112.57 61
 0 0 21 31.8122 83.9142 23
 0 0 22 67.7898 89.499 23
 0 0 22 105.029 96.1716 32
 0 0 22 306.897 103.154 24
 0 0 22 -7.41597 105.44 56
 0 0 -22 159.576 92.9668 66
 0 0 -22 121.461 105.766 13
 0 0 22 183.32 136.133 70
 0 0 -22 11.1104 119.935 19
 0 0 -22 -23.0198 119.436 18
 0 0 -22 83.6917 109.311 65
 0 0 -22 45.2097 121.231 61
 0 0 23 -31.0092 137.436 70
 0 0 -23 71.8553 121.618 61
 0 0 23 -5.97679 89.441 23
 0 0 -23 11.058 126.623 65
 0 0 -23 58.6408 132.014 19
 0 0 23 -15.9471 116.138 56
 0 0 23 42.3476 91.4695 24
 0 0 -23 60.8388 122.681 18
 0 0 -23 -31.9114 106.469 13
 0 0 24 393.704 115.74 23
 0 0 24 402.296 118.868 24
 0 0 24 537.383 189.759 70
 0 0 -24 277.243 136.719 13
 0 0 24 562.005 155.609 56
 0 0 -24 502.41 172.271 61
 0 0 -24 394.674 153.684 65
 0 0 -24 811.035 176.962 19
 0 0 -24 497.469 165.769 18
 0 0 -24 452.425 134.795 17
 0 0 -25 204.221 149.5 19
 0 0 -25 209.655 150.14 61
 0 0 25 125.32 121.107 56
 0 0 -25 114.443 125.901 13
 0 0 25 97.0676 103.45 23
 0 0 -25 72.4206 140.624 65
 0 0 -25 216.378 130.769 17
 0 0 25 185.379 180.174 70
 0 0 -25 106.126 146.791 18
 0 0 25 38.9133 102.32 24
 0 0 -26 166279 7345.99 19
 0 0 -26 170388 7323.39 13
 0 0 -26 160161 7300.68 17
 0 0 26 166869 7278.42 56
 0 0 26 152792 7243.58 24
 0 0 26 170200 7334.53 70
 0 0 -26 167999 7360.6 18
 0 0 -26 161343 7348.45 61
 0 0 -27 239.623 161.651 19
 0 0 -27 105.738 124.408 13
 0 0 27 32.3094 95.1722 24
 0 0 -27 87.9457 114.103 17
 0 0 -27 305.057 169.21 18
 0 0 27 105.8 129.033 56
 0 0 27 137.291 184.358 70
 0 0 -27 192.549 161.057 61
 0 0 -27 67.2931 91.9991 71
 0 0 -28 29801.7 1539.96 61
 0 0 -28 29648.3 1464.92 71
 0 0 -28 29856.2 1531.31 19
 0 0 28 31181.9 1481.09 56
 0 0 28 31484 1538.13 70
 0 0 -28 28962.6 1502.41 13
 0 0 -28 31268.3 1545.79 18
 0 0 -28 29539.1 1489.34 17
 0 0 29 -76.1863 181.708 70
 0 0 -29 13.6513 136.639 61
 0 0 29 9.74002 123.995 56
 0 0 -29 146.056 116.748 17
 0 0 -29 -13.6973 155.074 18
 0 0 -29 -22.6553 120.652 13
 0 0 30 1184.3 183.073 56
 0 0 -30 1295.76 191.713 13
 0 0 30 1287.2 244.197 70
 0 0 -30 1208.22 215.549 61
 0 0 -30 1081.13 163.162 17
 0 0 -30 1008.83 203.736 18
 0 0 -31 27.0037 86.723 17
 0 0 -31 40.2197 100.644 13
 0 0 31 -30.0754 111.527 26
 0 0 -31 -25.3359 135.8 61
 0 0 31 -13.549 161.134 50
 0 0 31 -84.3114 179.051 70
 0 0 -31 12.6157 147.672 18
 0 0 31 179.165 123.5 56
 0 0 32 243.357 120.387 56
 0 0 32 239.67 169.948 50
 0 0 -32 71.6634 87.2618 17
 0 0 32 270.79 170.642 70
 0 0 -32 153.549 127.615 61
 0 0 -33 53.9645 116.44 61
 0 0 33 -11.4428 145.008 50
 0 0 33 -7.11749 93.0499 56
 0 0 33 103.611 147.737 70
 0 0 -33 10.6908 113.87 62
 0 0 34 2285.66 235.529 70
 0 0 34 2136.71 237.177 50
 0 0 -34 2007.33 221.618 62
 0 0 -34 1817.25 213 61
 0 0 -35 -57.6377 98.9417 62
 0 0 35 -8.55416 96.8491 50
 0 0 -35 24.9186 86.1446 61
 0 0 35 -55.9666 114.417 70
 0 0 -36 1726.52 173.079 62
 0 0 36 1626.56 176.556 70
 0 0 36 2013.78 181.411 50
 0 0 -36 1837.53 173.955 61
 0 0 37 25.4827 66.9398 70
 0 0 -37 47.8427 54.7829 61
 0 0 -37 54.3586 57.5513 62
 0 1 0 8.3841 20.5568 4
 0 -1 0 5.9253 22.2045 6
 0 -1 0 7.9088 19.2765 4
 0 1 1 633.876 42.3048 10
 0 1 -1 571.783 47.1834 5
 0 -1 1 595.985 42.0969 6
 0 1 1 563.454 47.9538 7
 0 -1 2 12159.7 498.66 12
 0 -1 2 11308.9 501.711 11
 0 1 2 11704.8 496.845 10
 0 -1 -2 11362.6 496.793 10
 0 1 2 10670.9 500.668 2
 0 -1 3 179328 7786.5 11
 0 1 -3 188904 7782.3 12
 0 1 -3 170614 7784.73 11
 0 -1 -3 182783 7782.12 10
 0 1 -3 171809 7785.73 8
 0 1 -3 155150 7783.01 1
 0 1 3 176246 7786.39 2
 0 -1 3 173025 7785.97 8
 0 -1 -3 179057 7784.89 1
 0 -1 3 190899 7781.58 12
 0 1 3 191068 7782.95 10
 0 1 -4 1950.47 123.998 11
 0 1 -4 2118.28 123.408 12
 0 -1 -4 2490.94 130.918 10
 0 1 4 2246.03 131.259 10
 0 1 4 2258.3 138.836 2
 0 -1 -4 1847.67 126.821 2
 0 1 -4 1934.98 126.432 1
 0 1 4 1935.69 128.284 3
 0 -1 -4 2099.27 128.267 1
 0 -1 4 1821.12 125.738 8
 0 -1 4 1616.49 126.379 1
 0 -1 4 1973.21 114.927 12
 0 1 -4 1877.18 127.738 8
 0 1 4 2107.44 125.484 1
 0 1 -5 64866.4 2814.27 12
 0 -1 -5 60542.3 2822.25 2
 0 -1 5 67511.9 2812.5 12
 0 1 5 63475.8 2823.48 3
 0 1 -5 65233 2822.24 11
 0 -1 -5 60117.3 2820.45 3
 0 -1 5 60316.2 2819.72 1
 0 1 -5 65756 2823.05 8
 0 -1 -5 65042.3 2819.55 1
 0 1 5 64876.8 2822.93 1
 0 1 5 59452.6 2814.2 10
 0 -1 -5 67617.5 2818.1 10
 0 1 -5 67086.2 2820.78 1
 0 1 -6 15662.9 734.899 1
 0 -1 6 16239.4 737.403 1
 0 1 6 15915.9 741.764 1
 0 -1 -6 16054.4 738.877 3
 0 -1 6 16850 726.149 12
 0 -1 -6 15492.8 741.27 2
 0 -1 6 14818.1 735.463 3
 0 -1 -6 13242 727.273 9
 0 1 6 14980.9 738.667 3
 0 1 6 15690.8 729.627 9
 0 1 6 17190.1 735.433 10
 0 1 -6 17143.5 736.559 10
 0 1 -6 16703.6 731.049 12
 0 -1 -6 16083.8 733.354 10
 0 -1 -6 16672.1 736.37 1
 0 1 -6 16568 741.148 8
 0 1 -7 128498 5519.46 10
 0 1 7 128543 5515.8 9
 0 1 -7 128792 5531.06 8
 0 1 7 144237 5522.91 10
 0 1 7 116865 5509.1 12
 0 -1 -7 130599 5521.83 1
 0 1 7 119255 5524.11 3
 0 -1 -7 132724 5529.46 2
 0 -1 -7 122895 5516.36 9
 0 1 7 110998 5521.18 1
 0 -1 7 131052 5524.43 1
 0 -1 -7 120024 5523.01 3
 0 -1 -7 131614 5520.47 10
 0 -1 7 129949 5508.18 12
 0 1 -7 128385 5514.97 12
 0 -1 7 121017 5520.47 3
 0 1 -7 118348 5519.12 1
 0 -1 7 124449 5511.32 9
 0 1 -8 18690.3 843.897 8
 0 1 8 17645.7 836.879 3
 0 -1 -8 18165.2 831.504 1
 0 -1 -8 18146.7 826.962 9
 0 1 -8 18184.1 824.387 12
 0 -1 -8 18572.5 840.277 2
 0 -1 8 17636.7 833.741 3
 0 -1 8 17619.1 818.503 9
 0 1 8 16520.9 831.775 1
 0 -1 -8 18140.5 838.029 3
 0 -1 -8 18398 829.679 10
 0 -1 8 17856.5 833.419 1
 0 1 8 18012.8 823.863 9
 0 1 8 17336.6 817.588 12
 0 1 -8 17834.3 831.098 1
 0 -1 8 18191.2 815.784 12
 0 1 -8 16470.3 825.579 10
 0 1 9 23773.6 1054.01 1
 0 -1 -9 22833.8 1054.58 2
 0 -1 -9 23561.5 1045.87 1
 0 -1 9 22790.1 1051.6 1
 0 -1 -9 22788.1 1043.84 10
 0 -1 -9 23294 1053.34 3
 0 1 -9 22211.4 1044.83 1
 0 1 9 23010.6 1052.05 3
 0 1 -9 22857.6 1057.81 8
 0 -1 9 22036.5 1025.79 12
 0 -1 9 21398.3 1044.88 3
 0 -1 9 23393.1 1034.25 9
 0 1 -9 20872.7 1038.37 10
 0 -1 -9 22396.8 1040.86 9
 0 1 9 23027.3 1038.95 9
 0 1 -9 22025.7 1037.94 12
 0 1 9 22917.7 1030.23 12
 0 -1 10 48159.5 2064.64 9
 0 -1 -10 48880.8 2077.34 10
 0 1 10 46815.5 2069.74 9
 0 1 10 46671.1 2058.36 12
 0 -1 -10 47196.7 2077.26 1
 0 -1 10 45434.4 2055.5 12
 0 -1 -10 48597.9 2088.89 3
 0 1 -10 42459.1 2066.62 12
 0 -1 10 46014.6 2083.05 1
 0 -1 -10 49030.5 2092.17 2
 0 1 -10 45185.7 2089.43 8
 0 1 10 47710.4 2086.27 1
 0 1 -10 45861.3 2077.94 1
 0 1 10 46588.5 2084.67 3
 0 1 -10 42059.4 2070.85 10
 0 -1 10 43964.7 2077.54 3
 0 -1 11 14498.7 730.04 3
 0 -1 11 15799.1 707.492 12
 0 1 11 14551.9 732.486 1
 0 1 11 15360.8 721.198 9
 0 -1 11 14552.9 733.47 1
 0 -1 -11 15920.1 729.307 10
 0 1 11 14992.6 705.835 12
 0 1 -11 14658.8 729.744 1
 0 -1 -11 15549.5 741.823 2
 0 1 -11 15323.7 730.422 10
 0 1 11 14484.6 732.563 3
 0 -1 -11 15400.7 741.185 3
 0 -1 -11 15144.6 728.433 1
 0 -1 11 15078 712.717 9
 0 1 -11 13549.1 738.642 8
 0 1 12 60479.4 2773.46 9
 0 1 -12 61215.8 2802.91 8
 0 1 -12 64267.6 2789.27 1
 0 -1 12 62408.6 2790.67 3
 0 1 -12 64743.4 2785.48 10
 0 1 12 63452.2 2796.08 1
 0 1 12 60569 2755.51 12
 0 1 12 60081.7 2791.75 3
 0 -1 12 60926.5 2790.69 1
 0 -1 12 63744.8 2769.44 9
 0 -1 -12 61699.1 2781.15 10
 0 -1 -12 62664.6 2798.54 2
 0 -1 12 62245.7 2756.51 12
 0 -1 -12 62204.6 2795.73 3
 0 -1 -12 61712.1 2781.93 1
 0 1 13 224.246 89.1555 3
 0 -1 -13 128.831 84.4128 3
 0 1 13 311.548 87.6813 9
 0 1 -13 434.471 107.301 11
 0 -1 -13 280.353 87.1323 1
 0 1 -13 429.25 104.499 1
 0 -1 13 371.961 86.9033 9
 0 -1 13 216.407 86.9066 3
 0 -1 -13 628.831 113.658 10
 0 1 -13 643.304 122.718 10
 0 1 -13 245.165 108.601 8
 0 -1 13 304.453 71.1748 12
 0 1 13 293.489 74.8026 12
 0 -1 -13 412.913 117.408 2
 0 1 13 301.636 103.59 1
 0 -1 13 449.288 102.454 1
 0 -1 14 55717.4 2727.17 34
 0 1 -14 64318.5 2790.42 19
 0 1 14 60715.4 2745.29 64
 0 1 14 63943 2765.76 9
 0 1 -14 63960.8 2791.89 18
 0 1 14 60113.3 2763.92 70
 0 -1 14 58035.2 2741.51 22
 0 1 14 62509.1 2783.24 1
 0 1 -14 59876.4 2783.62 61
 0 1 -14 59604.8 2773.95 1
 0 -1 -14 63701.5 2794.42 2
 0 -1 -14 63811 2787.57 61
 0 1 14 59872.4 2734.85 12
 0 -1 -14 62129 2772.68 10
 0 1 -14 65984.2 2805.73 8
 0 -1 -14 63125 2773.7 1
 0 -1 14 59539.6 2736.7 12
 0 -1 14 62324.2 2754.1 9
 0 1 -14 65973.8 2799.28 11
 0 1 -14 60456.5 2780.41 55
 0 1 -14 61727.3 2775.09 39
 0 1 14 60677.7 2782.24 3
 0 -1 14 63016.9 2783.06 3
 0 -1 14 62891 2770.95 70
 0 -1 14 62316.9 2785.58 1
 0 1 -14 66075.8 2777.36 10
 0 -1 15 364.087 100.239 70
 0 1 -15 283.118 89.8634 65
 0 1 -15 416.077 98.0213 18
 0 -1 -15 280.462 91.7086 61
 0 1 -15 446.533 115.726 8
 0 -1 -15 374.962 90.3723 65
 0 1 -15 361.597 94.1315 55
 0 -1 15 283.554 67.2245 12
 0 1 15 300.387 69.7639 12
 0 1 -15 304.371 97.1704 19
 0 -1 15 313.909 83.7054 56
 0 -1 15 265.4 93.0429 22
 0 1 15 264.814 92.7423 1
 0 -1 -15 356.91 103.347 2
 0 1 15 371.814 102.002 3
 0 1 -15 446.788 110.545 11
 0 -1 15 302.585 95.4304 34
 0 -1 15 362.764 78.2106 24
 0 -1 15 292.694 79.5892 9
 0 1 -15 431.08 108.761 10
 0 1 -15 239.09 89.5656 1
 0 -1 15 380.954 97.3942 3
 0 1 15 472.772 100.484 70
 0 -1 -15 512.664 105.485 10
 0 -1 -15 387.119 91.6515 1
 0 -1 -15 285.696 103.546 8
 0 1 15 281.332 84.1474 34
 0 1 15 234.742 90.537 64
 0 -1 15 314.974 95.1223 1
 0 1 -15 238.457 81.5253 39
 0 1 -15 345.8 89.209 61
 0 1 15 373.561 93.5782 22
 0 1 16 18839.7 905.803 32
 0 1 16 17546.8 867.867 34
 0 1 -16 19236.3 953.513 8
 0 -1 16 19163.6 920.019 70
 0 -1 16 18003.1 930.24 1
 0 -1 -16 19538.4 936.358 61
 0 -1 16 17935.9 873.96 12
 0 1 -16 18831.4 934.875 19
 0 -1 -16 19019.5 911.572 66
 0 -1 16 17740 923.433 3
 0 -1 16 19035.1 879.643 23
 0 1 16 18458 881.604 56
 0 -1 -16 19232.6 942.848 2
 0 -1 16 17938.6 887.573 22
 0 1 16 17722.3 921.932 1
 0 1 16 17015.1 868.032 12
 0 1 -16 19890.5 946.332 11
 0 1 -16 18925.6 922.301 10
 0 -1 16 19837.6 896.184 24
 0 1 -16 19458.7 935.96 61
 0 1 -16 18426 939.215 18
 0 -1 16 16796.6 889.418 9
 0 1 -16 19157.3 925.266 1
 0 1 16 17978 928.848 3
 0 1 -16 18112.4 920.284 65
 0 -1 -16 17741 911.429 1
 0 -1 -16 19479.2 925.72 65
 0 -1 -16 20027.7 948.349 8
 0 1 16 17689.4 882.017 22
 0 -1 -16 18108.1 917.795 10
 0 1 16 19444.5 915.025 70
 0 -1 16 19268.3 895.914 56
 0 1 -16 21325.2 965.846 2
 0 1 17 5956.33 376.001 3
 0 -1 17 5979.42 328.144 23
 0 1 -17 6158.13 395.681 2
 0 -1 -17 5689.03 349.791 66
 0 -1 17 5866.64 374.514 1
 0 1 -17 5988.02 377.233 61
 0 -1 17 5700.27 342.363 9
 0 1 17 6107.33 362.761 70
 0 -1 17 5149.85 314.5 12
 0 1 -17 6315.97 381.113 19
 0 -1 17 6129 317.428 28
 0 -1 17 5974.48 365.56 70
 0 1 -17 6247.8 388.109 11
 0 -1 -17 5799.38 380.573 8
 0 1 17 6203.16 356.712 73
 0 1 17 5165.99 317.551 34
 0 1 17 5793.23 330.904 56
 0 1 17 5197.03 360.39 1
 0 1 17 5691.01 328.16 24
 0 1 -17 5989.65 370.197 65
 0 1 -17 5676.48 365.169 10
 0 1 -17 5905.52 358.392 66
 0 -1 -17 5961.22 366.745 10
 0 1 -17 5620.4 360.744 1
 0 -1 -17 6156.53 378.901 61
 0 1 17 5635.28 332.716 22
 0 1 -17 6481.86 397.617 8
 0 -1 17 5373.56 364.404 3
 0 1 17 5546 347.666 32
 0 -1 -17 6181.42 366.972 1
 0 -1 -17 5905.11 366.675 65
 0 -1 17 5538.45 338.284 56
 0 -1 -17 5818.45 380.113 2
 0 1 17 4782.16 307.019 12
 0 -1 17 6137.81 344.497 24
 0 -1 17 5593.37 341.651 32
 0 1 -17 5907.24 381.217 18
 0 1 -18 801.085 140.545 19
 0 1 18 673.871 114.826 73
 0 -1 -18 650.649 128.317 39
 0 -1 18 674.614 105.896 9
 0 1 -18 712.888 130.05 11
 0 1 18 622.985 117.872 34
 0 -1 18 723.372 112.052 24
 0 1 -18 686.431 136.021 8
 0 1 -18 803.486 136.08 61
 0 1 -18 726.147 120.245 1
 0 1 -18 615.536 113.561 66
 0 1 18 516.308 117.121 3
 0 -1 18 622.525 89.6252 28
 0 -1 18 701.143 125.609 3
 0 -1 18 589.035 105.117 23
 0 -1 -18 673.859 110.778 66
 0 -1 18 635.419 111.45 32
 0 1 18 797.616 136.792 70
 0 -1 18 597.499 132.172 70
 0 1 18 604.562 119.911 1
 0 1 18 702.546 118.988 22
 0 1 18 790.951 103.683 24
 0 -1 -18 894.866 143.769 61
 0 1 -18 649.624 131.096 18
 0 -1 18 671.628 129.433 1
 0 -1 -18 784.114 131.597 19
 0 1 18 714.092 123.222 32
 0 -1 -18 540.106 108.572 1
 0 1 18 635.798 107.001 56
 0 -1 -18 863.156 131.853 65
 0 -1 -18 610.6 125.802 8
 0 1 -18 790.201 138.767 65
 0 -1 18 709.218 121.105 56
 0 1 -19 7714.71 467.255 13
 0 -1 -19 6589.65 439.363 1
 0 1 19 7147.34 437.849 32
 0 -1 -19 8055.39 482.029 18
 0 -1 19 8473.25 444.851 56
 0 1 -19 7218.79 474.687 18
 0 -1 19 8383.95 437.688 24
 0 -1 19 7825.89 418.77 23
 0 1 -19 8638.55 487.438 61
 0 1 19 7292.99 412.343 24
 0 -1 19 7376.38 458.392 70
 0 -1 -19 6548.37 455.966 55
 0 1 -19 8333.7 478.012 65
 0 1 -19 7769.82 448.684 66
 0 -1 -19 7405.01 467.676 19
 0 1 19 6858.72 423.262 22
 0 -1 19 7791.2 404.228 28
 0 1 19 6594.82 449.991 1
 0 -1 -19 7131.13 459.396 39
 0 -1 -19 7517.1 444.842 66
 0 -1 -19 7551.96 461.969 65
 0 1 19 7843.18 427.273 56
 0 1 -19 8502.61 491.434 19
 0 1 19 7623.69 457.704 70
 0 -1 -19 7606.21 473.186 61
 0 1 19 7145.99 437.118 73
 0 1 -19 6981.53 450.538 1
 0 1 20 19382.5 955.047 24
 0 1 20 18921.1 970.105 22
 0 -1 -20 19834.7 1025.72 19
 0 -1 -20 19188.7 990.256 66
 0 -1 20 19627.4 958.426 23
 0 -1 20 18620.9 937.603 28
 0 1 20 20736 974.401 56
 0 -1 -20 19304.5 1020.11 55
 0 1 20 19983.5 1007.89 70
 0 -1 20 20543.6 1016.41 70
 0 -1 -20 21068.8 1024.06 65
 0 1 -20 20611 1035.46 19
 0 1 20 19494.3 991.482 73
 0 -1 20 20257.9 977.735 24
 0 1 -20 20039.1 1019.5 13
 0 1 -20 21187.8 1038.85 61
 0 -1 -20 20683 1038.73 61
 0 1 -20 20590.1 1027.96 65
 0 -1 -20 19414.9 1031.52 18
 0 1 -20 20643 1040.58 18
 0 -1 20 21112.2 987.773 56
 0 -1 -20 19295.3 1016.58 39
 0 1 20 19230.1 988.627 32
 0 1 21 11425.8 611.639 70
 0 -1 21 11216 574.226 24
 0 -1 -21 9830.11 575.688 66
 0 -1 -21 10078.4 620.516 61
 0 -1 -21 10277.1 605.817 65
 0 1 -21 11164 633.578 18
 0 1 -21 10358.7 610.025 65
 0 -1 21 10270.6 574.962 56
 0 1 -21 11756.3 634.635 19
 0 1 21 10310.9 581.232 32
 0 -1 -21 10642.1 618.957 19
 0 -1 21 9639.13 545.793 23
 0 -1 -21 8667.31 589.714 39
 0 -1 21 10164.8 606.945 70
 0 1 21 10176.8 580.781 73
 0 1 -21 10245 610.477 13
 0 1 21 10611.9 549.305 24
 0 -1 -21 10160.4 618.687 18
 0 1 -21 10405.3 621.253 61
 0 1 21 10790.8 562.922 56
 0 -1 -21 10025.7 613.838 55
 0 -1 22 7899.11 463.294 56
 0 1 22 8129.4 450.272 56
 0 1 22 7423.48 459.421 73
 0 1 -22 7891.91 505.247 19
 0 1 22 6892.95 424.139 24
 0 1 -22 7366.76 502.541 18
 0 1 22 6880.42 452.688 32
 0 -1 -22 7599.93 460.948 66
 0 -1 22 8072.85 455.117 24
 0 -1 -22 7425.45 499.816 61
 0 1 -22 7227.94 476.138 17
 0 1 22 7885.74 490.526 70
 0 1 -22 7608.88 497.439 65
 0 1 -22 7307.82 497.97 61
 0 -1 -22 7857.15 504.259 18
 0 -1 -22 8403.84 502.099 65
 0 -1 22 7465.48 490.241 70
 0 1 -22 7358.22 485.703 13
 0 -1 22 6912.96 425.02 23
 0 -1 -22 7685.21 497.967 19
 0 1 -23 959.895 195.365 18
 0 -1 -23 902.386 141.892 66
 0 1 -23 1148.92 201.065 61
 0 -1 23 827.382 190.185 70
 0 -1 -23 1049.32 184.023 19
 0 -1 23 894.696 151.554 24
 0 1 23 1050.7 159.689 73
 0 1 23 1118.57 162.593 56
 0 1 -23 1122.97 194.626 65
 0 1 -23 971.94 174.098 13
 0 1 23 1229.33 210.832 70
 0 -1 -23 848.216 190.264 18
 0 1 -23 1021.3 175.109 17
 0 -1 -23 1311.13 196.927 65
 0 -1 23 1201.73 176.478 56
 0 1 23 942.668 136.4 24
 0 1 23 1004.09 160.836 32
 0 1 -23 1354.22 211.283 19
 0 -1 -23 992.608 189.512 61
 0 -1 23 1094.07 156.225 23
 0 1 24 47099.2 2171.09 70
 0 1 -24 45593.3 2175.14 13
 0 1 -24 47879.1 2185.85 65
 0 -1 -24 45018.2 2186.99 19
 0 -1 -24 48436.4 2186.46 65
 0 -1 -24 44728 2130.28 66
 0 1 -24 46412 2194.92 61
 0 1 -24 48078.2 2206.91 18
 0 -1 24 47738.7 2140.37 56
 0 -1 24 45829.8 2177.25 70
 0 1 -24 44963.2 2160.03 17
 0 1 24 41231 2121.23 32
 0 1 24 44715.9 2113.61 56
 0 1 -24 47778.4 2199 19
 0 -1 -24 47511.4 2171.32 13
 0 -1 24 45466.7 2118.07 24
 0 -1 -24 46641.2 2202.99 18
 0 1 24 44106.7 2131.47 73
 0 -1 -24 44562.7 2190.55 61
 0 -1 24 42334.1 2090.68 23
 0 -1 -25 15588.4 843.781 13
 0 1 -25 14984.9 865.628 19
 0 -1 25 14805.5 796.417 24
 0 1 25 15971.3 857.672 70
 0 -1 25 15886.4 820.992 56
 0 1 25 15070.6 795.482 56
 0 1 -25 15809.6 855.262 13
 0 -1 -25 15833.4 879.358 61
 0 1 -25 14264.2 860.47 18
 0 -1 25 15660.5 859.822 70
 0 -1 -25 15843.9 876.146 18
 0 -1 25 14034.6 772.752 23
 0 -1 -25 14400.1 854.879 19
 0 -1 -25 15218.1 852.909 65
 0 1 -25 13985.4 823.232 17
 0 1 -25 15444.1 866.653 61
 0 -1 -26 26721.2 1410.17 17
 0 -1 -26 27931.1 1468.53 61
 0 -1 26 28386 1388.08 24
 0 -1 -26 28177.1 1467.68 18
 0 -1 -26 30556.3 1472.1 19
 0 1 -26 29479.6 1466.9 19
 0 -1 -26 28465.1 1445.97 65
 0 -1 26 28766 1411.32 56
 0 1 26 28494.3 1388.4 56
 0 1 -26 27703 1422.85 17
 0 -1 26 30631.9 1464.58 70
 0 -1 -26 28817.3 1431.6 13
 0 1 -26 28546.1 1441.28 13
 0 1 26 30355.1 1452.7 70
 0 1 -26 28905.1 1460.98 61
 0 1 -26 28784.3 1475.34 18
 0 1 -26 26270.2 1396.48 71
 0 1 -27 13.913 151.062 18
 0 -1 27 -12.7705 190.487 70
 0 1 27 62.63 114.439 56
 0 1 -27 36.1317 133.201 13
 0 -1 -27 55.656 147.248 61
 0 1 -27 11.306 113.186 17
 0 -1 -27 64.0444 109.193 17
 0 1 27 133.741 164.348 70
 0 -1 -27 99.6343 135.228 65
 0 -1 27 82.6029 146.709 56
 0 1 -27 89.399 94.963 71
 0 -1 27 106.719 109.576 24
 0 -1 -27 -65.9742 151.955 19
 0 1 -27 40.7302 154.605 61
 0 -1 -27 13.8064 136.161 18
 0 -1 -27 45.7722 110.267 13
 0 -1 -28 139.928 159.533 61
 0 -1 -28 234.768 168.653 18
 0 -1 28 198.041 156.701 56
 0 -1 28 364.674 206.88 70
 0 1 -28 189.356 129.227 17
 0 -1 28 230.8 116.331 24
 0 1 -28 134.741 93.8086 71
 0 1 -28 258.696 163.804 61
 0 1 -28 83.5346 124.867 13
 0 1 28 190.06 119.102 56
 0 -1 -28 198.735 110.25 17
 0 -1 -28 92.3145 128.315 19
 0 1 28 234.748 190.457 70
 0 1 -28 250.5 157.766 18
 0 -1 -28 237.343 125.992 13
 0 -1 29 5043.8 424.03 70
 0 -1 29 4601.63 335.299 24
 0 1 -29 4815.53 339.332 71
 0 -1 29 4554.03 357.917 26
 0 -1 -29 4537.65 359.995 13
 0 1 -29 4572.93 396.982 61
 0 1 -29 4615.26 372.35 13
 0 1 29 4389.16 337.516 56
 0 1 -29 5253.03 420.395 18
 0 1 -29 4884.49 367.37 17
 0 -1 -29 4743.85 395.571 19
 0 1 29 5002.52 405.279 70
 0 -1 -29 4942.51 359.52 17
 0 -1 -29 4971.57 409.762 61
 0 -1 29 4810.02 368.748 56
 0 -1 -29 4965.82 412.578 18
 0 -1 -30 197.692 113.786 13
 0 1 30 168.758 173.657 70
 0 1 -30 416.48 130.62 17
 0 -1 30 546.439 187.363 50
 0 -1 30 320.134 201.923 70
 0 -1 -30 421.298 168.158 18
 0 -1 -30 268.579 161.116 61
 0 -1 30 243.909 148.657 56
 0 1 -30 225.783 168.088 18
 0 1 30 423.341 124.391 56
 0 1 -30 310.712 144.461 13
 0 -1 -30 348.063 111.547 17
 0 1 -30 221.244 152.132 61
 0 1 -31 2342.26 261.403 61
 0 -1 31 2611.2 294.323 50
 0 1 31 2639.35 287.765 70
 0 -1 -31 2997.56 304.182 61
 0 1 31 2622.7 229.141 56
 0 1 -31 2578.44 237.514 17
 0 -1 31 2372.19 286.905 70
 0 -1 -31 2226.25 231.107 13
 0 -1 -31 2187.85 214.662 17
 0 -1 31 2435.26 248.509 56
 0 -1 -31 2559.56 278.304 18
 0 -1 -32 12489.5 749.209 61
 0 1 -32 13533.6 762.179 62
 0 -1 -32 11526.1 693.282 13
 0 1 32 13157.1 725.015 26
 0 -1 32 13229.9 762.518 70
 0 1 32 13454.8 782.4 50
 0 -1 -32 13951 762.207 18
 0 -1 32 13024.4 762.026 50
 0 1 32 13847.8 754.792 70
 0 -1 32 12830.2 709.767 56
 0 1 -32 13021 746.915 61
 0 1 -33 409.12 151.252 62
 0 1 -33 536.258 144.99 61
 0 -1 33 413.284 152.769 50
 0 1 33 456.839 173.354 50
 0 1 33 357.121 121.094 26
 0 1 33 427.064 158.241 70
 0 -1 33 351.386 123.481 56
 0 -1 -33 610.976 156.641 61
 0 -1 33 298.868 164.389 70
 0 -1 34 5420.57 383.5 50
 0 -1 34 6058.92 400.521 70
 0 1 -34 5111.98 378.532 62
 0 1 -34 5302.55 372.356 61
 0 1 34 5629.44 399.181 50
 0 -1 -34 5756.5 386.844 61
 0 -1 34 5030.42 336.408 56
 0 1 34 5431.43 374.952 70
 0 -1 -34 5181.07 375.591 62
 0 -1 -35 673.129 130.996 61
 0 -1 -35 867.524 141.239 62
 0 -1 35 707.774 152.805 70
 0 1 -35 707.259 136.533 62
 0 1 35 796.623 155.134 50
 0 1 -35 721.863 128.631 61
 0 -1 35 846.7 142.103 50
 0 1 35 798.112 145.116 70
 0 -1 -36 125.962 85.1279 61
 0 -1 36 42.7827 70.2148 50
 0 1 -36 90.7184 82.7517 62
 0 1 36 223.045 95.5889 70
 0 1 -36 118.364 78.8134 61
 0 -1 -36 164.476 84.7009 62
 0 1 36 188.186 100.328 50
 0 -1 36 198.193 105.081 70
 0 1 37 43.7792 67.1054 50
 0 -1 -37 20.3715 53.5616 62
 0 1 37 4.65709 55.4111 70
 0 -1 37 -16.0299 66.162 70
 0 1 -37 122.145 65.3589 62
 0 -1 -37 54.569 54.6453 61
 0 1 -37 59.4815 51.0799 61
 0 2 0 562176 23624.8 6
 0 2 0 521337 23619.8 4
 0 -2 0 583798 23625 6
 0 2 0 506166 23626.8 5
 0 -2 -1 17888 821.533 7
 0 2 -1 18516.9 820.616 5
 0 -2 -1 17909.3 811.733 4
 0 2 1 19895.8 818.944 6
 0 2 -1 18131.6 814.55 6
 0 -2 1 16372.5 817.713 5
 0 -2 -1 20656.5 818.403 6
 0 -2 1 18778.3 814.945 6
 0 2 1 18343.1 821.212 7
 0 2 1 15964.9 817.698 5
 0 -2 2 27742.1 1316.33 6
 0 2 -2 30958 1324.8 5
 0 2 2 29421.3 1319.87 6
 0 2 2 29858 1314.35 10
 0 -2 -2 29744 1318.32 6
 0 -2 2 31350 1326 11
 0 -2 -2 30034.3 1325.43 7
 0 2 -3 30497.7 1395.29 5
 0 -2 3 32241.4 1398.04 11
 0 -2 -3 30924.7 1397.8 7
 0 2 -3 31904.2 1391.23 12
 0 2 3 31292.8 1386 10
 0 2 3 31079.4 1396.01 2
 0 2 4 71315.7 2946.12 10
 0 -2 4 67567.9 2955.94 11
 0 2 -4 66118.7 2953.28 11
 0 -2 -4 63707.4 2944.52 10
 0 2 -4 68459.1 2948.69 12
 0 2 -4 63306.3 2950.88 1
 0 -2 -4 68339.2 2953.77 1
 0 2 4 66703.7 2954.75 2
 0 -2 4 68214.5 2956.89 8
 0 -2 5 255384 10918.3 8
 0 -2 5 214617 10910.5 1
 0 -2 5 258958 10917.6 11
 0 -2 5 264321 10907.7 12
 0 -2 -5 248904 10906.6 10
 0 -2 -5 244791 10915.6 2
 0 2 -5 247541 10907.5 12
 0 2 -5 244023 10913.2 11
 0 2 5 248979 10916.9 2
 0 2 5 262811 10908 10
 0 -2 -5 253138 10913.4 1
 0 2 -5 255950 10914.9 1
 0 -2 -6 64836.3 3183.46 3
 0 2 -6 66790 3180.77 1
 0 -2 -6 74202.8 3188.1 2
 0 2 6 72981.4 3178.7 10
 0 -2 -6 76361.5 3186.42 1
 0 2 -6 74538.1 3186.8 11
 0 2 6 74037.6 3190.65 2
 0 -2 6 70939.6 3188.3 8
 0 -2 -6 70066.3 3179.06 10
 0 -2 6 74857.8 3175.23 12
 0 -2 6 74951 3189.55 1
 0 2 -6 71958.8 3178.17 12
 0 -2 7 15444.6 733.349 12
 0 2 -7 16042.1 748.125 11
 0 2 -7 16405.8 746.626 1
 0 2 -7 15929 740.129 12
 0 -2 7 15917.8 750.443 8
 0 -2 -7 15383.3 744.391 1
 0 2 7 15036.9 740.048 10
 0 2 -7 15734.6 749.116 8
 0 -2 -7 15757.5 750.43 3
 0 -2 7 16364.8 752.169 1
 0 -2 -7 16242.8 742.318 10
 0 -2 -7 16609.1 753.563 2
 0 2 7 16621.1 755.856 3
 0 2 8 157511 6933.72 10
 0 -2 -8 151257 6942.66 3
 0 2 -8 155831 6944.11 8
 0 2 -8 160960 6934.61 12
 0 2 -8 160433 6941.87 1
 0 -2 -8 153163 6944.46 2
 0 2 -8 157088 6943.54 11
 0 2 8 149867 6946.36 3
 0 2 -8 175218 6938.18 10
 0 -2 -8 151398 6937.74 1
 0 -2 8 162871 6927.45 12
 0 -2 8 157755 6945.88 1
 0 -2 -8 159520 6935.81 10
 0 -2 -9 23197.3 1096.69 2
 0 2 -9 24556.3 1100.21 8
 0 -2 -9 20556.8 1079.1 9
 0 2 -9 24989.8 1087.43 10
 0 2 -9 24251.3 1092.96 1
 0 -2 -9 23003.5 1094.56 3
 0 -2 9 23820 1074.28 12
 0 -2 9 23405.6 1074.08 9
 0 -2 -9 23615 1085.57 10
 0 -2 9 22687.5 1095.88 1
 0 2 9 27109.5 1092.9 10
 0 2 -9 24435.9 1097.2 11
 0 -2 9 22041.9 1091.08 3
 0 2 -9 24701.4 1086.83 12
 0 2 9 21951 1095.51 3
 0 -2 -9 23187.4 1088.93 1
 0 2 -10 38529.6 1639.97 12
 0 2 -10 37133 1644.47 1
 0 -2 -10 35785.9 1647.86 3
 0 2 10 35089.6 1650.22 3
 0 -2 10 35752.1 1645.76 3
 0 -2 10 35958.1 1622.32 9
 0 -2 -10 35966 1636.66 9
 0 -2 10 36465.4 1622.26 12
 0 -2 -10 36708.4 1649.19 2
 0 -2 10 34805.5 1647.05 1
 0 -2 -10 35996 1636.5 10
 0 2 -10 33994.6 1632.71 10
 0 -2 -10 35805.9 1638.21 1
 0 2 -10 37641.9 1652.36 11
 0 2 10 30743.2 1619.83 12
 0 2 -10 37968.9 1653.28 8
 0 2 10 41443.6 1642.06 10
 0 -2 11 51278.5 2309.91 9
 0 2 -11 46281.3 2317.19 10
 0 2 -11 54663.9 2328.02 12
 0 -2 -11 51511.3 2324.64 10
 0 -2 11 53254.8 2338.81 3
 0 2 -11 54576.9 2346.19 8
 0 -2 -11 50703.5 2325.28 9
 0 2 -11 54268.3 2344.35 11
 0 -2 11 51011.4 2338.45 1
 0 -2 -11 51191.6 2338.52 2
 0 -2 -11 51677 2338 3
 0 -2 11 55727.3 2311.53 12
 0 2 11 51505.4 2342.6 3
 0 -2 -11 50440 2325.96 1
 0 2 11 49303.3 2309.33 12
 0 2 -11 52040.9 2333.15 1
 0 -2 12 2728.6 214.869 1
 0 -2 12 2826.11 177.85 12
 0 -2 12 2738.96 182.572 9
 0 2 -12 2525.76 195.836 10
 0 2 -12 2542.21 193.678 12
 0 2 12 2490.61 202.534 3
 0 -2 -12 3089.71 207.412 10
 0 -2 -12 2521.24 207.742 2
 0 2 -12 2818.15 214.174 8
 0 2 -12 2623.76 201.325 1
 0 -2 -12 2534.94 197.613 1
 0 -2 12 2333.26 193.89 3
 0 2 -12 3129.85 225.958 11
 0 2 12 2575.77 205.099 1
 0 2 12 2399.36 175.806 12
 0 -2 -12 2711.15 204.112 3
 0 2 -13 5380.8 342.581 8
 0 -2 13 5188.77 300.782 9
 0 -2 -13 5146.58 331.518 2
 0 2 13 5706.03 303.135 12
 0 -2 -13 5536.94 335.401 3
 0 -2 13 5470.09 301.399 12
 0 2 -13 5146.66 322.91 1
 0 -2 13 5216.2 335.019 1
 0 -2 -13 5433.39 322.915 1
 0 -2 -13 6036.67 330.004 10
 0 2 -13 5224.35 333.919 11
 0 2 13 5357.98 335.653 3
 0 -2 13 5512.86 332.689 3
 0 2 -13 5128.76 323.347 12
 0 2 -13 5278.24 325.146 10
 0 -2 -14 6231.24 354.735 1
 0 2 -14 5749.37 360.678 61
 0 2 14 6542.25 376.104 3
 0 2 -14 5651.45 366.456 11
 0 -2 14 5703.11 335.26 56
 0 -2 -14 5858.1 357.229 55
 0 2 -14 5385.21 367.446 8
 0 2 -14 6102.31 361.021 1
 0 -2 -14 6167.06 370.899 2
 0 2 14 5992.67 326.175 12
 0 -2 14 5938.11 326.294 12
 0 -2 -14 6018.83 355.983 10
 0 2 14 6060.11 350.481 70
 0 -2 14 5738.37 365.627 1
 0 -2 -14 6054.57 353.675 39
 0 2 -14 6362.19 360.693 10
 0 -2 14 6154.4 362.924 3
 0 2 -14 5896.39 361.059 13
 0 -2 14 6040.4 333.504 9
 0 -2 14 6407.46 338.909 24
 0 2 14 5588.59 326.875 64
 0 -2 -14 6126.38 346.91 38
 0 2 14 5916.95 338.603 53
 0 -2 -14 6813.69 376.928 3
 0 2 -14 4923.75 344.076 65
 0 2 15 332.058 74.9698 12
 0 -2 -15 262.28 99.4404 2
 0 2 15 365 98.5058 32
 0 -2 -15 334.126 94.5155 10
 0 2 -15 293.706 101.167 8
 0 -2 15 321.245 75.017 28
 0 2 -15 316.481 102.368 11
 0 2 -15 481.952 106.363 13
 0 -2 15 323.618 87.1702 24
 0 2 15 290.517 92.1246 64
 0 2 15 394.33 99.6417 70
 0 2 -15 325.921 96.2742 1
 0 -2 -15 404.201 94.1714 1
 0 -2 15 414.413 90.7598 23
 0 -2 -15 299.357 97.3474 3
 0 2 15 322.078 82.8291 34
 0 2 15 342.106 88.3058 22
 0 -2 15 326.858 74.1309 12
 0 -2 15 337.983 90.6414 56
 0 2 15 475.136 107.217 3
 0 2 -15 299.121 97.6444 10
 0 -2 -15 309.888 81.5823 38
 0 -2 15 254.412 72.712 9
 0 2 -15 366.681 97.8581 61
 0 -2 15 368.901 109.534 1
 0 2 15 426.731 92.5393 6
 0 -2 15 273.657 92.0765 3
 0 2 -15 296.96 104.65 19
 0 -2 -15 225.377 86.1238 39
 0 2 -16 18510.6 915.795 13
 0 2 16 19011.5 866.662 22
 0 -2 16 18759.6 916.601 3
 0 -2 16 18053.8 862.514 12
 0 2 16 17610.6 869.118 64
 0 2 -16 18195 916.858 61
 0 -2 -16 17720 893.427 66
 0 2 16 18385.3 896.292 32
 0 2 -16 18835.1 928.951 11
 0 2 -16 18099.3 901.513 10
 0 -2 16 18996.9 857.48 28
 0 -2 16 19923.6 886.026 24
 0 2 16 16330.4 843.159 34
 0 -2 -16 17973.7 901.91 10
 0 -2 -16 17064.5 912.828 3
 0 2 16 16128.6 850.541 12
 0 2 16 18698.4 861.274 56
 0 2 -16 17975.7 906.002 1
 0 2 -16 18025.2 914.203 19
 0 2 -16 18942.9 934.206 8
 0 2 16 17556.1 916.99 3
 0 2 16 19121.5 901.71 70
 0 -2 16 18648.3 883.971 56
 0 -2 16 17953 865.8 23
 0 -2 -16 18824.4 925.487 2
 0 -2 -16 18746.2 902.909 1
 0 -2 16 17197.3 871.149 9
 0 2 16 18038.4 899.737 6
 0 -2 16 17577.4 916.965 1
 0 2 -17 9736.14 534.801 11
 0 -2 -17 9370.56 496.851 66
 0 -2 17 8984.44 481.936 56
 0 2 17 9481.25 464.914 56
 0 2 -17 8721.51 503.961 1
 0 -2 -17 8826.18 519.999 2
 0 2 17 7994.29 447.407 34
 0 2 -17 9013.54 531.343 8
 0 -2 -17 9084.36 501.952 65
 0 -2 -17 8348.41 498.856 10
 0 2 -17 8796.19 511.481 13
 0 2 17 8903.18 501.251 6
 0 -2 -17 9534.37 505.59 1
 0 2 -17 9280.91 520.358 61
 0 -2 17 8948.05 513.888 3
 0 -2 17 8739.57 467.848 23
 0 -2 17 8708.38 481.194 24
 0 -2 17 8873.44 455.388 28
 0 2 -17 8066.31 512.575 18
 0 2 -17 8652.83 500.133 10
 0 2 17 8142.34 448.881 12
 0 -2 17 8530.07 472.962 9
 0 -2 17 8733.43 517.989 1
 0 2 17 8907.12 494.665 70
 0 2 17 8617.62 464.551 22
 0 -2 -17 7832.81 504.719 61
 0 2 17 8929.26 495.551 32
 0 2 17 9031.11 476.728 64
 0 2 -17 9371.91 524.636 19
 0 2 18 211.679 103.956 32
 0 -2 18 294.482 100.41 24
 0 -2 -18 263.453 88.2322 66
 0 -2 18 290.078 105.85 56
 0 2 -18 247.382 108.706 13
 0 -2 18 299.804 81.9135 28
 0 2 -18 244.145 102.427 61
 0 -2 18 261.193 74.0548 63
 0 2 18 56.7188 93.5351 22
 0 2 18 214.633 109.755 70
 0 2 18 352.816 85.5157 56
 0 2 -18 328.282 109.275 8
 0 -2 18 178.842 84.8514 3
 0 2 18 178.024 97.7274 34
 0 -2 18 181.486 68.4823 9
 0 -2 18 359.202 106.4 1
 0 2 -18 235.151 107.049 19
 0 -2 -18 401.961 122.72 61
 0 -2 -18 407.169 103.876 65
 0 -2 18 249.084 95.7959 23
 0 2 -18 281.291 99.8643 11
 0 -2 -18 279.831 87.2288 1
 0 2 -18 453.777 104.701 1
 0 2 -18 244.237 108.175 18
 0 -2 19 2357.51 213.424 56
 0 -2 19 2184.11 177.042 28
 0 2 -19 2118.6 216.968 17
 0 2 -19 2069.08 221.874 61
 0 -2 19 2198.94 188.726 9
 0 -2 19 2372.53 196.909 23
 0 2 19 2430.87 219.011 32
 0 2 19 2359.49 203.663 22
 0 2 19 2386.05 186.216 56
 0 2 19 2242.12 223.937 70
 0 2 19 2744.83 230.258 73
 0 -2 -19 2298.44 209.039 1
 0 -2 19 2312.84 208.242 24
 0 2 -19 2730.96 240.366 13
 0 -2 19 2262.65 183.131 63
 0 2 -19 2451.58 243.843 18
 0 -2 -19 2470.23 224.556 65
 0 -2 -19 2584.29 241.642 61
 0 2 -19 2660.46 239.604 19
 0 -2 -19 2465.89 212.828 66
 0 -2 20 912.685 178.279 70
 0 -2 -20 1452.37 188.689 61
 0 2 20 1165.38 164.044 22
 0 2 20 1062.66 161.869 73
 0 -2 20 1227.47 150.869 23
 0 2 -20 1230 186.193 18
 0 2 20 1059.89 131.28 56
 0 2 20 1084.11 160.505 32
 0 -2 20 1176.47 150.9 24
 0 2 -20 1163.18 175.716 61
 0 -2 20 933.83 122.871 28
 0 -2 -20 1230.34 171.575 65
 0 2 -20 1236.81 185.45 19
 0 2 -20 1025.92 161.298 17
 0 -2 20 917.755 122.145 63
 0 2 -20 1286.76 177.218 13
 0 -2 -20 1036.6 150.502 66
 0 -2 20 1097.17 167.186 56
 0 -2 -20 1253.12 176.792 19
 0 2 20 1090.49 172.215 70
 0 2 -21 498.82 146.846 18
 0 -2 21 317.718 117.178 23
 0 2 -21 240.682 120.94 61
 0 -2 21 201.532 85.5029 63
 0 -2 21 252.845 131.437 56
 0 -2 -21 446.268 135.995 18
 0 2 21 435.699 124.204 73
 0 2 -21 305.338 126.62 17
 0 -2 21 302.859 123.289 24
 0 -2 -21 362.226 137.779 61
 0 2 21 265.824 147.249 70
 0 2 21 251.456 122.063 32
 0 2 21 286.43 128.549 22
 0 -2 21 278.99 96.1403 28
 0 -2 21 406.145 153.134 70
 0 -2 -21 270.488 114.417 65
 0 2 -21 266.249 133.34 13
 0 -2 -21 242.244 104.231 66
 0 2 -21 415.481 138.523 19
 0 2 21 184.327 94.3376 56
 0 -2 -21 417.376 131.035 19
 0 -2 -22 16317.3 863.574 18
 0 -2 22 14213.3 768.395 63
 0 -2 22 13746.6 756.117 28
 0 -2 -22 15211.2 813.205 66
 0 -2 22 16211.8 817.34 56
 0 -2 22 14533.2 780.517 23
 0 2 22 15176.9 823.442 73
 0 -2 22 15001.8 800.747 24
 0 -2 -22 16151.4 858.392 19
 0 -2 22 16275.4 852.205 70
 0 2 22 15722.3 782.442 56
 0 2 -22 14626.2 856.112 18
 0 2 22 15714.9 835.169 70
 0 2 -22 16015 860.568 19
 0 -2 -22 16578.9 846.779 65
 0 2 22 15224.5 818.388 32
 0 -2 -22 15401.5 860.329 61
 0 2 -22 17181.9 865.963 13
 0 2 -22 16483.5 845.61 17
 0 2 -22 15244.2 849.573 61
 0 2 -23 9452.07 565.295 13
 0 2 23 8851.55 498.546 56
 0 -2 -23 9041.72 579.025 61
 0 2 -23 9438.05 583.965 19
 0 -2 -23 8497.14 563.728 18
 0 -2 23 9174.85 534.398 56
 0 2 23 8357.92 529.468 73
 0 -2 23 8631.08 518.566 24
 0 -2 23 8437.42 484.196 63
 0 2 23 9235.61 550.894 70
 0 2 -23 8843.68 548.341 17
 0 2 23 8131.88 522.438 32
 0 -2 23 8321.68 477.355 28
 0 2 -23 8756.91 565.052 61
 0 -2 -23 8746.48 524.463 66
 0 2 -23 8144.7 568.391 18
 0 -2 23 8312.26 499.708 23
 0 -2 -23 9364.2 559.539 65
 0 -2 -23 9836.24 573.381 19
 0 -2 23 8800.06 563.662 70
 0 -2 -24 6002.76 439.376 61
 0 2 -24 5200.88 411.708 13
 0 2 24 5167.74 379.014 32
 0 -2 24 5263.48 360.866 23
 0 -2 -24 5720.45 432.561 18
 0 2 -24 5414.51 440.331 18
 0 2 24 5457.44 390.122 73
 0 -2 -24 5639.14 421.419 19
 0 -2 -24 5424.67 409.489 65
 0 2 -24 5724.62 411.34 17
 0 -2 24 5962.85 388.04 24
 0 2 -24 4858.18 374.779 71
 0 2 24 6228.22 420.86 70
 0 -2 24 5561.26 394.543 56
 0 -2 24 5840.38 433.885 70
 0 2 -24 5315.29 416.691 61
 0 2 24 5166.89 353.426 56
 0 -2 -24 5486.18 379.894 66
 0 -2 24 5187.03 335.3 28
 0 -2 -25 7630.03 530.098 61
 0 -2 -25 7277.32 513.763 19
 0 2 -25 7331.05 480.189 71
 0 -2 25 7977.77 499.161 56
 0 2 25 7689.51 510.11 70
 0 2 -25 7642.61 541.807 18
 0 -2 -25 7628.71 500.064 13
 0 -2 -25 8150.43 516.544 65
 0 -2 25 8158.55 484.743 24
 0 2 25 7290.52 480.128 32
 0 -2 -25 7166.75 470.549 66
 0 -2 25 6365.87 446.442 23
 0 2 -25 7713.55 508.423 13
 0 2 25 7836.2 493.333 73
 0 2 25 7219.9 450.121 56
 0 -2 -25 8392.04 541.705 18
 0 2 -25 7648.7 504.236 17
 0 2 -25 7402.08 518.073 61
 0 -2 25 7874.6 532.98 70
 0 -2 -26 4157.57 367.259 19
 0 2 -26 4366.33 363.034 13
 0 -2 26 4230.6 349.058 56
 0 -2 -26 4509.72 364.522 65
 0 -2 26 3754.21 367.257 70
 0 -2 -26 4224.71 345.348 13
 0 2 26 3597.69 313.514 32
 0 2 -26 4349.77 331.837 71
 0 -2 -26 4456.8 382.399 18
 0 -2 -26 3878.77 311.089 66
 0 2 -26 3959.84 362.688 61
 0 -2 26 4453.45 331.552 24
 0 2 -26 3823.39 370.627 18
 0 2 -26 4380.1 354.994 17
 0 2 26 4306.74 333.01 73
 0 -2 -26 3862.4 369.695 61
 0 2 26 4216.29 308.682 56
 0 2 26 4891.91 377.074 70
 0 2 -27 2023.46 272.992 18
 0 -2 -27 2189.84 242.551 13
 0 2 -27 1916.7 253.609 61
 0 -2 27 2116.28 230.988 24
 0 2 27 1952.46 262.18 70
 0 2 -27 2106.24 250.322 13
 0 -2 -27 2147.6 280.701 61
 0 -2 27 1980.14 284.489 70
 0 2 27 1846.49 200.059 56
 0 -2 -27 2126.78 258.589 19
 0 -2 -27 1893.69 265.281 18
 0 2 -27 2206.49 242.774 17
 0 2 -27 1784.01 206.588 71
 0 -2 27 2254.61 259.038 56
 0 -2 -27 2228.68 252.567 65
 0 -2 -27 1798.54 211.347 17
 0 2 -28 22.8391 120.08 17
 0 2 -28 109.668 132.326 13
 0 -2 -28 181.191 107.26 17
 0 -2 28 97.2055 122.087 24
 0 -2 28 -66.4872 156.308 56
 0 -2 -28 191.728 149.636 18
 0 -2 -28 76.4379 113.287 13
 0 2 28 82.2513 101.371 56
 0 2 28 -23.8252 168.652 70
 0 2 -28 27.8269 143.333 18
 0 -2 28 52.7033 215.18 70
 0 2 -28 66.8545 136.787 61
 0 -2 -28 51.9779 145.449 19
 0 2 -28 79.4628 94.9844 71
 0 -2 -28 42.2583 148.102 61
 0 -2 -29 9249.89 616.752 61
 0 -2 -29 8491.4 580.354 19
 0 -2 29 9482.68 620.145 70
 0 -2 29 9492.15 578.489 56
 0 2 -29 8636.33 531.263 71
 0 -2 -29 8490.13 532.898 17
 0 -2 29 9628.33 551.842 24
 0 -2 -29 9079.96 606.135 18
 0 2 -29 8446.2 584.416 61
 0 -2 -29 9488.81 559.36 13
 0 2 29 9541.44 591.593 70
 0 2 29 8178.84 510.517 56
 0 -2 29 9520.45 609.467 50
 0 2 -29 9312.97 579.53 13
 0 2 -29 9044.12 564.313 17
 0 -2 -30 406.413 123.998 13
 0 -2 30 610.466 172.896 56
 0 -2 -30 390.236 173.008 61
 0 2 -30 582.265 162.856 61
 0 -2 -30 526.343 162.381 19
 0 2 -30 644.688 146.651 17
 0 -2 -30 414.426 165.089 18
 0 -2 30 349.939 129.645 24
 0 2 30 265.563 171.431 70
 0 -2 30 376.088 209.001 70
 0 -2 -30 364.223 108.234 17
 0 -2 30 539.584 172.462 50
 0 2 -30 250.212 97.0748 71
 0 -2 31 2221.97 262.716 50
 0 2 31 2624.1 275.428 70
 0 -2 -31 2607.96 281.557 18
 0 -2 -31 2420.74 267.753 61
 0 -2 -31 2209.43 222.794 13
 0 -2 31 2424.38 298.177 70
 0 -2 31 2727.52 232.345 24
 0 2 -31 2315.71 259.294 61
 0 2 -31 2420.75 278.879 62
 0 -2 31 2263.23 257.793 56
 0 2 -31 2382.35 233.354 17
 0 -2 32 1641.3 221.593 50
 0 -2 -32 1824.21 227.858 18
 0 2 -32 1700.56 217.795 61
 0 -2 -32 1600.32 226.736 61
 0 -2 -32 1347.69 166.575 13
 0 -2 32 1843.27 219.088 56
 0 -2 32 2134.25 265.756 70
 0 2 -32 1792.96 237.862 62
 0 2 32 1820.47 230.904 70
 0 -2 -33 4250.41 319.076 18
 0 -2 33 3515.72 300.028 50
 0 -2 33 3339.73 280.862 56
 0 -2 -33 3324.29 301.562 61
 0 2 33 3715.27 303.616 70
 0 2 -33 3385.97 295.856 61
 0 2 33 3382.39 285.116 26
 0 2 -33 3882.75 318.541 62
 0 2 33 3806.11 340.622 50
 0 -2 33 3885.78 331.923 70
 0 -2 -34 956.773 160.615 61
 0 2 34 1153.39 167.445 70
 0 2 34 918.837 144.337 26
 0 -2 34 902.616 149.803 50
 0 2 -34 1082.03 174.313 62
 0 -2 34 804.234 138.758 56
 0 -2 34 989.168 185.276 70
 0 -2 -34 994.031 154.012 62
 0 2 34 869.961 185.12 50
 0 2 -35 913.071 134.031 61
 0 2 -35 921.253 148.563 62
 0 2 35 985.985 163.643 50
 0 -2 35 973.008 166.816 70
 0 -2 -35 809.757 143.298 61
 0 2 35 880.364 140.113 70
 0 -2 35 825.699 118.601 56
 0 -2 35 817.769 128.413 50
 0 -2 -35 822.327 131.324 62
 0 2 -36 175.688 70.9367 61
 0 -2 -36 145.585 77.035 61
 0 2 36 249.374 89.0492 70
 0 2 36 65.8101 94.2337 50
 0 -2 -36 163.452 77.4376 62
 0 2 -36 268.58 94.873 62
 0 -2 36 158.61 104.819 70
 0 2 37 56.1746 70.6553 50
 0 2 -37 60.0684 63.7145 62
 0 -2 -37 161.908 64.6544 61
 0 -2 37 106.952 75.8123 70
 0 3 0 640.682 81.8185 5
 0 -3 0 673.834 71.3777 6
 0 3 0 494.616 67.9048 6
 0 3 0 486.64 87.1162 7
 0 -3 0 573.298 78.2807 5
 0 3 -1 173045 7535.85 4
 0 -3 -1 160814 7545.87 5
 0 -3 1 166931 7546.17 5
 0 -3 -1 190340 7542.38 6
 0 3 -1 170446 7539.99 6
 0 -3 1 157677 7543.14 1
 0 -3 1 184509 7541.08 6
 0 3 1 172978 7546.52 5
 0 3 1 172201 7549.19 7
 0 3 1 175195 7542.67 6
 0 3 -1 176270 7547.32 5
 0 -3 -1 169380 7534.75 4
 0 -3 -2 12652.6 544.219 6
 0 -3 -2 11461.1 553.233 7
 0 3 -2 11935.3 551.426 5
 0 -3 2 11437.6 551.713 5
 0 3 2 11587.7 546.341 6
 0 -3 2 11874.8 542.268 6
 0 3 2 10634.5 546.893 7
 0 -3 -2 11626.2 539.404 4
 0 3 -3 12207.4 659.697 12
 0 3 3 14304.5 655.131 10
 0 -3 -3 14047 672.458 7
 0 -3 3 14603.6 661.714 6
 0 -3 -3 15735.7 664.574 6
 0 -3 3 15051.6 676.063 11
 0 3 3 15243.2 668.709 6
 0 3 -3 14318.6 669.848 5
 0 3 -4 30468.9 1346.94 12
 0 3 4 31512.6 1350.59 6
 0 3 4 30355.1 1337.22 10
 0 -3 4 29126.4 1341.82 6
 0 3 4 29426.3 1351.25 2
 0 -3 -4 27735.3 1353.78 7
 0 -3 4 30210.8 1354.58 11
 0 3 -4 31007.2 1353.56 5
 0 -3 5 442.271 96.3222 8
 0 -3 5 477.724 95.4752 11
 0 3 5 506.833 87.1573 6
 0 3 5 500.763 80.8408 10
 0 -3 -5 383.581 80.4269 9
 0 3 -5 454.093 86.6678 5
 0 3 -5 507.383 82.0348 12
 0 3 5 423.113 95.0747 2
 0 3 -5 444.656 89.373 1
 0 -3 -5 438.001 84.9278 7
 0 -3 6 4355.83 257.303 1
 0 -3 6 4578.17 263.972 8
 0 3 -6 4254.82 253.114 11
 0 3 6 4738.85 245.977 10
 0 3 -6 4624.76 253.161 1
 0 -3 -6 4626.06 256.283 1
 0 3 6 4557.39 258.772 2
 0 -3 -6 4542.79 246.619 9
 0 3 -6 4215.62 249.146 12
 0 -3 -6 4153.35 241.728 10
 0 -3 6 4323.55 254.38 11
 0 -3 7 28262.4 1262.06 1
 0 3 -7 27245.6 1253.86 11
 0 -3 -7 28750.1 1257.2 1
 0 3 -7 27295.1 1255.15 1
 0 3 7 28680.6 1263.56 2
 0 3 -7 26790.8 1245.89 12
 0 -3 7 28436.4 1262.94 8
 0 -3 -7 26568.2 1244.58 10
 0 3 7 28907.9 1246.47 10
 0 -3 -7 24095.8 1253.93 3
 0 -3 -8 50350.9 2345.61 10
 0 3 8 55973.7 2369.83 2
 0 3 8 50548.6 2344.49 10
 0 -3 -8 54074 2364.15 3
 0 -3 -8 54027.9 2356.46 1
 0 3 -8 53287.2 2357.17 11
 0 3 -8 50110.4 2353.63 1
 0 3 -8 55088 2352.04 12
 0 -3 8 51532 2361.68 1
 0 -3 8 52914.8 2362.18 8
 0 3 9 58544 2669.47 10
 0 -3 9 59918.1 2690.84 1
 0 3 -9 66622 2675.93 10
 0 3 -9 56800.5 2677.71 1
 0 -3 -9 61740.4 2681.77 1
 0 -3 -9 57792.2 2671.79 10
 0 3 -9 60366 2683.52 11
 0 -3 9 58484 2684.23 8
 0 3 -9 60171.7 2674.05 12
 0 -3 -9 59409.4 2689.34 3
 0 -3 -10 74294.2 3341.12 3
 0 -3 -10 73522.3 3333.04 1
 0 3 -10 79562.9 3329.97 10
 0 -3 10 74305.3 3346.71 1
 0 3 10 77576 3325.96 10
 0 -3 -10 73754.8 3328.19 10
 0 3 -10 70873.3 3332.91 1
 0 3 -10 74801.4 3339.86 11
 0 3 -10 74443.3 3327.38 12
 0 3 -11 890.424 127.863 1
 0 -3 -11 996.593 127.748 1
 0 3 -11 1067.57 131.894 11
 0 3 11 935.682 124.72 6
 0 3 -11 879.413 117.806 10
 0 -3 -11 934.988 119.628 10
 0 -3 -11 1071.48 138.909 2
 0 -3 -11 1180.06 134.955 3
 0 -3 11 1002.24 128.006 1
 0 -3 11 868.271 128.974 3
 0 3 11 1227.14 128.805 10
 0 3 -11 1127.09 126.56 12
 0 -3 11 964.651 104.249 9
 0 -3 -12 78339.4 3464.15 10
 0 3 -12 79463.3 3472.7 1
 0 3 12 75345.5 3465 6
 0 -3 -12 79479.1 3480.09 3
 0 -3 12 76665.4 3479.71 1
 0 -3 -12 80575 3467.89 1
 0 -3 12 78559.5 3476.2 3
 0 3 12 69587.9 3443.26 12
 0 3 -12 72554 3452.23 10
 0 -3 12 78315.7 3442.08 9
 0 3 -12 82033.8 3466.2 12
 0 -3 -12 76226.8 3461.77 9
 0 3 -12 84707.9 3484.97 11
 0 -3 -12 78760.1 3480.99 2
 0 -3 13 6174.92 314.221 56
 0 -3 -13 4672.78 307.02 67
 0 -3 -13 4648.06 305.069 9
 0 -3 13 4673.79 317.194 3
 0 3 -13 4743.87 311.253 65
 0 -3 -13 4818.29 325.485 2
 0 -3 -13 4059.12 309.246 3
 0 3 13 4968.19 313.312 6
 0 -3 13 4939.67 317.712 70
 0 -3 13 6209.96 309.604 23
 0 3 13 4227.93 289.494 12
 0 -3 13 5829.82 306.832 24
 0 3 13 5178.26 307.262 27
 0 3 -13 5324.63 326.451 1
 0 -3 -13 5150.31 319.005 10
 0 3 -13 4883.76 319.766 17
 0 3 -13 5420.28 334.139 11
 0 -3 13 5000.11 289.919 9
 0 3 -13 5545.65 324.561 12
 0 -3 13 5866.78 346.374 1
 0 3 -13 5170.26 317.424 10
 0 -3 -13 4376.3 302.833 1
 0 3 -13 4804.73 315.858 13
 0 -3 -13 4775.43 301.443 38
 0 -3 14 117157 5235.54 1
 0 3 -14 112854 5215.22 1
 0 3 -14 117607 5221.04 17
 0 3 -14 108328 5199.53 10
 0 -3 14 119670 5183.5 23
 0 3 -14 107991 5216.63 13
 0 -3 -14 115276 5211.91 67
 0 3 14 114808 5185.15 12
 0 3 14 117787 5215.87 32
 0 -3 14 119259 5229.29 3
 0 -3 14 118164 5195.77 56
 0 3 14 117430 5205.37 70
 0 -3 -14 114426 5208.45 1
 0 -3 14 124374 5200.74 24
 0 3 14 120701 5220.7 6
 0 3 -14 126876 5240.34 11
 0 -3 -14 119279 5212.91 39
 0 -3 14 118578 5213.64 70
 0 -3 14 123147 5176.64 28
 0 3 -14 118049 5225.39 61
 0 3 14 121948 5200.24 27
 0 -3 -14 112614 5208.57 10
 0 -3 -14 122378 5234.1 3
 0 3 14 116992 5177.48 64
 0 3 -14 113147 5214.07 65
 0 -3 -14 114940 5199.43 20
 0 -3 -14 118108 5205.72 38
 0 -3 14 111185 5179.89 9
 0 -3 -14 118995 5233.45 2
 0 3 -14 121637 5216.88 12
 0 -3 -15 6097.64 357.06 1
 0 -3 -15 5674 367.637 3
 0 -3 -15 6173.32 367.241 55
 0 3 15 5793.04 306.75 34
 0 3 -15 5312.97 351.265 12
 0 -3 -15 5860.85 356.856 39
 0 -3 -15 5724.78 345.754 38
 0 -3 15 5743.87 343.762 56
 0 3 15 5640.42 319.133 22
 0 -3 -15 5647.13 354.709 67
 0 -3 -15 6216.62 356.336 66
 0 3 -15 5515.59 360.838 61
 0 -3 -15 5872.54 372.583 2
 0 3 15 5599.64 344.493 27
 0 -3 15 5995.96 324.296 28
 0 3 15 5806.14 352.345 70
 0 -3 15 5231.32 321.558 9
 0 3 -15 5111.4 352.148 17
 0 3 15 6181.26 364.66 6
 0 3 -15 5019.52 354.384 13
 0 3 15 4994.38 349.578 32
 0 3 -15 5892.23 363.122 1
 0 3 -15 5257.5 352.629 65
 0 -3 15 6007.58 335.009 23
 0 -3 -15 5961.48 359.145 10
 0 3 15 5690.02 328.003 64
 0 3 -15 5695.5 355.841 10
 0 -3 15 6253.4 347.346 24
 0 -3 15 6113.57 331.868 63
 0 3 15 5500.51 323.945 12
 0 -3 15 5056.82 356.214 3
 0 -3 15 5779.8 375.157 1
 0 3 -15 5458.77 364.696 11
 0 -3 15 5770.2 359.236 70
 0 -3 -16 15386.9 771.018 55
 0 3 -16 13060.4 745.124 12
 0 -3 16 16057.4 746.914 24
 0 -3 -16 14677.3 756.747 39
 0 3 -16 13112.5 764.434 11
 0 -3 16 14889.4 779.878 1
 0 3 16 14148.9 738.112 27
 0 3 16 17604.7 776.92 32
 0 -3 16 14862.8 740.705 56
 0 -3 -16 15086.6 756.654 1
 0 3 16 13439.5 750.27 6
 0 -3 16 15282.1 726.849 23
 0 3 16 14226.3 714.062 12
 0 -3 16 14282.4 766.921 3
 0 -3 16 14994.4 724.373 63
 0 -3 16 13510.4 717.65 9
 0 3 -16 14283.9 748.523 10
 0 -3 -16 14725.4 776.099 2
 0 3 -16 14411.8 765.816 61
 0 -3 -16 15220.8 751.04 38
 0 3 -16 13672 760 13
 0 -3 16 15766.6 718.784 28
 0 -3 -16 15419.2 753.417 66
 0 -3 -16 13740.1 751.279 10
 0 3 16 13791.7 693.798 34
 0 -3 -16 14504.9 776.824 3
 0 3 16 14924 707.064 56
 0 3 16 15178 749.412 70
 0 3 -16 14848.1 764.198 65
 0 3 -16 14141.8 756.8 1
 0 3 16 14708.3 712.33 22
 0 3 16 14803 722.175 64
 0 3 -16 14299.4 761.292 17
 0 -3 -17 310.627 110.317 55
 0 3 -17 458.964 110.465 65
 0 3 17 647.153 133.813 32
 0 -3 17 412.431 82.4797 9
 0 -3 -17 328.583 108.491 39
 0 -3 -17 403.875 112.984 3
 0 3 -17 246.385 100.194 61
 0 -3 -17 459.188 113.08 10
 0 3 17 297.797 97.6952 22
 0 3 17 315.857 104.525 64
 0 -3 17 377.395 92.4851 63
 0 3 -17 311.558 106.11 11
 0 -3 -17 290.842 99.4316 38
 0 3 -17 409.072 104.773 1
 0 -3 -17 378.426 98.3889 1
 0 -3 17 254.165 92.7509 3
 0 3 17 275.89 91.4234 34
 0 -3 17 279.012 103.744 24
 0 -3 17 435.112 106.415 23
 0 -3 17 274.492 105.753 1
 0 3 -17 272.105 107.923 17
 0 3 -17 386.18 112.454 10
 0 -3 -17 502.192 108.993 66
 0 -3 17 335.15 114.37 56
 0 3 17 227.068 104.74 70
 0 -3 17 429.562 92.3798 28
 0 -3 -17 318.381 109.473 2
 0 3 -17 313.553 120.465 13
 0 3 17 304.599 77.838 56
 0 3 18 10552.2 563.275 32
 0 -3 18 9278.86 516.055 9
 0 -3 18 9622.33 507.409 48
 0 3 18 9222.93 520.064 64
 0 -3 18 10462.4 546.112 56
 0 -3 18 9970.18 537.663 24
 0 -3 -18 10120 562.728 39
 0 -3 -18 10482.2 555.855 65
 0 3 -18 10152.2 573.09 13
 0 -3 -18 9511.14 543.511 66
 0 3 18 10595.6 508.187 56
 0 -3 18 9955.43 521.295 63
 0 3 18 9634.91 544.588 70
 0 3 -18 9549.5 575.201 11
 0 -3 -18 10500.6 576.835 55
 0 -3 18 9088.28 502.999 28
 0 3 18 8311.7 486.861 34
 0 3 18 9544.65 510.533 22
 0 -3 -18 9338.41 543.928 1
 0 3 -18 9713.15 559.285 17
 0 -3 18 10053.5 573.23 3
 0 3 -18 9815.22 571.504 61
 0 -3 18 9694.6 522.934 23
 0 -3 -19 6592.58 428.371 55
 0 3 19 6551.12 364.374 56
 0 -3 19 5966.99 364.201 28
 0 3 -19 6792.87 427.62 17
 0 -3 19 6196.88 393.233 24
 0 -3 19 6390.65 378.015 63
 0 3 -19 6594.2 430.621 61
 0 3 19 6422.24 413.813 32
 0 -3 -19 6712.68 409.316 66
 0 3 19 6100.48 372.441 22
 0 -3 -19 6148.08 412.899 39
 0 -3 19 6253.74 383.25 23
 0 3 -19 6516.61 429.938 13
 0 -3 19 6454.78 405.74 56
 0 -3 -19 6478.37 412.716 65
 0 3 19 6255.21 409.973 70
 0 -3 19 6618.29 370.975 48
 0 -3 -20 4867.67 344.33 66
 0 3 20 4651.74 319.408 22
 0 -3 20 5236.46 336.088 23
 0 -3 20 5128.48 351.132 56
 0 -3 20 4946.01 309.309 48
 0 3 -20 5231.31 377.488 13
 0 3 -20 4717.05 360.164 17
 0 3 20 5157.02 359.532 32
 0 3 -20 5596.67 364.514 71
 0 -3 20 4851.91 312.1 28
 0 -3 -20 4951.08 363.484 39
 0 -3 -20 5128.78 355.261 65
 0 -3 20 5301.52 347.512 24
 0 3 20 4846.25 352.016 70
 0 3 20 4777.65 303.301 56
 0 -3 20 4938.97 320.628 63
 0 3 -20 5126.51 375.536 61
 0 -3 -20 5219.39 375.79 55
 0 -3 -21 27588.2 1420.57 55
 0 -3 -21 28122.5 1391.34 66
 0 -3 -21 30416.5 1414.57 65
 0 -3 21 27390.1 1342.94 28
 0 3 -21 29211.8 1421.09 13
 0 3 21 27581.4 1338.27 56
 0 3 21 26290.1 1346.09 22
 0 -3 21 28240.6 1356.85 63
 0 3 -21 30730.8 1425.56 17
 0 3 21 30292 1416.29 73
 0 3 -21 30066.5 1434.75 61
 0 3 21 29230.2 1397.97 70
 0 -3 -21 27996.8 1411.9 39
 0 -3 21 30064.6 1395.73 56
 0 3 -21 28002.5 1400.84 71
 0 3 21 27972.6 1397.72 32
 0 -3 21 28074.2 1361.46 23
 0 -3 21 29980.9 1389.57 24
 0 -3 22 605.228 150.478 23
 0 3 22 571.564 145.892 73
 0 -3 -22 445.418 150.592 18
 0 -3 22 414.354 136.112 24
 0 3 22 399.676 142.45 32
 0 3 22 411.774 100.473 56
 0 -3 -22 453.394 160.311 55
 0 -3 -22 602.455 143.469 19
 0 3 -22 455.09 139.424 17
 0 -3 -22 295.747 152.942 39
 0 -3 22 437.439 155.007 56
 0 3 -22 473.537 155.424 61
 0 3 -22 670.323 143.58 71
 0 -3 -22 460.909 134.281 65
 0 3 -22 393.637 150.293 13
 0 3 22 388.123 160.911 70
 0 -3 -22 343.877 122.737 66
 0 -3 22 505.54 123.917 28
 0 -3 22 560.365 118.706 63
 0 3 -23 5941.58 424.328 17
 0 -3 23 6734.79 419.934 24
 0 -3 -23 5931.2 406.263 66
 0 3 -23 5878.23 434.324 61
 0 3 23 5959.36 416.628 32
 0 -3 -23 5831.72 417.367 65
 0 -3 23 5763.46 389.189 23
 0 3 23 6190.12 425.746 70
 0 3 -23 5935.09 412.204 71
 0 -3 23 5507.55 368.636 63
 0 -3 23 6435.24 426.142 56
 0 3 -23 6783.72 445.445 13
 0 -3 -23 5769.86 427.788 19
 0 3 23 6479.86 431.611 73
 0 -3 23 5712.52 367.895 28
 0 -3 -23 6200.74 440.242 18
 0 3 23 5760.29 361.781 56
 0 -3 -23 5427.94 428.024 39
 0 3 -24 36368.6 1717.18 13
 0 -3 -24 36672.4 1707.11 65
 0 3 24 34539.4 1620.7 56
 0 3 24 35545.6 1688.23 70
 0 3 -24 31815 1714.54 18
 0 -3 24 31755.8 1640.34 23
 0 3 -24 35280 1702.29 17
 0 -3 24 33529.9 1627.97 63
 0 -3 24 36423.7 1689.02 56
 0 3 -24 33588.9 1677.5 71
 0 -3 -24 37022.1 1718.84 19
 0 3 24 36827.1 1700.86 73
 0 3 24 32854.7 1671.4 32
 0 -3 24 31512.5 1614.57 28
 0 -3 -24 36482.2 1727.99 18
 0 3 -24 36067.7 1724.64 61
 0 -3 24 37826 1681.89 24
 0 -3 -24 34039.6 1669 66
 0 3 -25 13789.5 787.859 71
 0 -3 25 12754.5 734.134 63
 0 -3 -25 14825.4 807.75 65
 0 -3 -25 14673.7 826.275 19
 0 3 -25 14651.4 828.298 61
 0 -3 -25 14072 826.49 18
 0 3 -25 13937.3 834.008 18
 0 -3 25 13840.3 777.584 24
 0 3 25 14282.1 798.294 73
 0 3 -25 15080.3 824.811 13
 0 3 25 13907.3 733.928 56
 0 3 25 15314.6 813.676 70
 0 3 25 13096.8 777.458 32
 0 -3 -25 14593.1 784.302 66
 0 3 -25 15349.3 817.662 17
 0 -3 25 15238 807.858 56
 0 -3 -25 14108.2 835.943 61
 0 3 -26 2658.64 298.018 61
 0 3 26 2869.27 273.534 32
 0 3 26 2894.43 280.237 73
 0 -3 -26 3458.29 306.589 65
 0 -3 26 3114.41 284.57 24
 0 -3 26 2879.74 302.721 56
 0 -3 26 3222 308.273 50
 0 -3 -26 2614.08 255.103 66
 0 3 -26 2856.05 284.189 17
 0 3 -26 3050.28 328.83 18
 0 3 -26 2919.59 272.209 71
 0 -3 -26 3089.58 316.737 18
 0 3 26 3033.66 301.916 70
 0 3 -26 3153.08 308.921 13
 0 -3 -26 2901.4 277.479 13
 0 -3 -26 2801.49 294.589 19
 0 -3 -26 2814.79 311.08 61
 0 -3 27 2814.88 296.616 56
 0 3 -27 2996.57 289.428 17
 0 -3 -27 2528.84 295.199 18
 0 -3 -27 2541.23 278.029 65
 0 -3 -27 2681.05 317.985 61
 0 3 -27 2587.73 282.348 61
 0 -3 27 2158.24 270.324 50
 0 -3 27 2690.48 267.702 24
 0 3 27 2490.81 256.858 73
 0 3 27 2494.65 250.345 32
 0 3 -27 2537.52 282.334 13
 0 3 -27 2461.1 245.676 71
 0 -3 -27 2713.69 286.739 19
 0 3 27 2518.79 279.922 70
 0 -3 -27 2578.66 257.096 13
 0 -3 28 1950.68 260.952 56
 0 -3 -28 2057.72 278.186 61
 0 -3 28 1992.9 247.698 50
 0 -3 -28 1758.6 198.881 17
 0 3 -28 1980.09 237.515 17
 0 3 28 2354.93 266.782 70
 0 3 28 1767.05 215.783 73
 0 -3 -28 1713.88 234.135 65
 0 -3 -28 2330.65 258.278 19
 0 -3 -28 1849.6 256.351 18
 0 -3 28 2150.99 240.569 24
 0 3 -28 2008.18 216.309 71
 0 -3 28 2290.1 313.165 70
 0 -3 -28 2031.75 222.03 13
 0 3 -28 1978.8 253.715 61
 0 -3 -29 8121.62 555.761 61
 0 -3 29 7919.26 527.888 50
 0 -3 29 8210.54 534.156 56
 0 -3 29 8193.11 562.034 70
 0 3 29 7700.98 515.164 70
 0 -3 -29 7528.49 520.854 19
 0 -3 -29 6789.43 458.17 17
 0 -3 -29 7816.23 489.291 13
 0 3 -29 7472.4 477.605 71
 0 3 -29 7881.95 507.633 17
 0 -3 -29 7434.38 525.519 18
 0 3 -29 7447.9 518.914 61
 0 -3 29 7863.61 495.668 24
 0 -3 -30 138.866 141.46 18
 0 -3 30 271.304 136.845 24
 0 -3 30 129.067 207.96 70
 0 -3 -30 241.846 111.438 13
 0 3 30 195.476 147.554 70
 0 3 -30 122.174 129.487 61
 0 -3 -30 165.991 134.432 19
 0 -3 -30 -53.401 152.186 61
 0 3 -30 167.309 91.6149 71
 0 -3 30 145.374 169.688 56
 0 -3 30 247.041 138.631 50
 0 -3 31 87.8106 123.651 50
 0 -3 -31 113.917 139.21 61
 0 3 -31 195.314 124.829 61
 0 -3 31 111.587 181.283 70
 0 -3 31 115.844 157.154 56
 0 -3 -31 94.9032 135.931 18
 0 3 31 123.4 146.711 70
 0 -3 31 26.5113 109.501 24
 0 -3 -31 159.632 95.2499 13
 0 -3 -32 599.556 173.165 61
 0 3 -32 507.588 141.078 61
 0 3 32 541.76 150.627 70
 0 -3 32 456.136 160.799 56
 0 -3 32 397.308 120.418 24
 0 -3 -32 665.331 154.185 18
 0 -3 32 641.259 208.136 70
 0 -3 32 357.462 130.468 50
 0 3 33 -45.8998 146.094 50
 0 3 33 85.4101 118.22 70
 0 3 -33 85.4198 99.123 61
 0 -3 33 103.742 130.236 56
 0 -3 -33 146.797 111.452 18
 0 -3 33 63.8202 161.267 70
 0 -3 33 -25.8456 101.945 50
 0 -3 -33 10.678 127.666 61
 0 3 -34 41.2231 86.2312 61
 0 -3 34 147.524 109.402 56
 0 -3 -34 85.1237 115.483 61
 0 3 34 118.641 108.119 70
 0 -3 34 227.827 145.831 70
 0 3 34 101.266 145.521 50
 0 3 34 166.854 103.045 26
 0 -3 35 5116.59 328.158 56
 0 -3 -35 4986.96 334.48 62
 0 -3 35 5517.06 368.493 70
 0 3 35 6010.05 386.235 50
 0 3 35 5163.42 324.978 26
 0 3 35 5452.07 335.946 70
 0 -3 -35 6185.16 373.916 61
 0 3 -35 5467.53 341.753 61
 0 -3 -36 638.689 93.869 72
 0 3 36 1020.75 110.594 70
 0 -3 -36 1005.03 127.111 61
 0 3 -36 891.383 132.644 62
 0 -3 -36 767.761 102.039 62
 0 -3 36 1192.79 150.834 70
 0 3 36 1055.6 145.583 50
 0 3 -36 776.498 102.837 61
 0 -3 -37 5722.68 335.149 61
 0 -3 37 6304.73 344.306 70
 0 3 -37 5472.28 334.011 62
 0 3 37 6049.75 346.408 50
 0 4 0 217589 9962.02 6
 0 -4 0 226384 9972.4 5
 0 4 0 226542 9973.86 7
 0 4 0 226396 9970.18 5
 0 -4 0 242333 9962.67 6
 0 -4 1 63077.5 2547.75 6
 0 4 -1 57310.2 2556.15 5
 0 4 1 57180.2 2548.95 6
 0 4 1 56328.2 2558.03 7
 0 -4 -1 60901.4 2548.38 6
 0 -4 1 55449.9 2554.12 1
 0 -4 1 55052.2 2555.41 5
 0 4 -1 55796.8 2545.87 6
 0 4 1 56000.3 2554.29 5
 0 4 -1 57329.2 2539.22 4
 0 -4 -1 57390.2 2557.97 5
 0 4 -2 23411.1 1071.83 4
 0 -4 -2 23516.5 1071.61 4
 0 4 2 24673.6 1082.89 6
 0 4 -2 23251.9 1086.39 5
 0 -4 2 25025 1077.07 6
 0 -4 2 21509.5 1081.5 1
 0 -4 2 22461.7 1086.39 5
 0 4 2 22539.5 1087.56 7
 0 -4 -2 26350.1 1079.35 6
 0 -4 -2 24051.4 1090.61 5
 0 -4 3 15720.4 767.262 11
 0 -4 -3 17952.6 757.005 6
 0 4 3 17144.6 762.945 6
 0 -4 -3 15181.6 762.133 5
 0 -4 -3 15687.2 748.917 4
 0 4 3 16663.8 742.401 10
 0 -4 3 16641.2 751.042 6
 0 4 3 15156.6 760.88 7
 0 4 -3 15678.2 761.923 5
 0 -4 -3 16106.6 766.461 7
 0 -4 4 49044.1 2138.99 6
 0 -4 -4 47983.4 2155.57 7
 0 -4 4 47922.8 2156.32 11
 0 4 -4 48784.5 2145.03 12
 0 4 -4 46309.8 2149.35 5
 0 4 4 46766.7 2128.78 10
 0 4 4 50344.3 2151.16 6
 0 4 -5 111782 5057.34 5
 0 4 5 111192 5038.55 10
 0 4 5 118451 5059.02 6
 0 -4 5 115184 5046.5 6
 0 4 -5 118836 5053.56 12
 0 -4 5 115153 5064.11 11
 0 4 5 111060 5058.37 2
 0 -4 -5 116589 5048.6 9
 0 -4 -5 116760 5064.53 7
 0 4 6 154447 6610.3 6
 0 4 -6 151479 6603.1 12
 0 -4 6 150261 6615.23 11
 0 4 6 147821 6609.34 2
 0 4 6 160543 6592.59 10
 0 -4 -6 152771 6597.63 9
 0 -4 6 153093 6616.41 8
 0 -4 -6 150778 6614.39 7
 0 -4 6 138082 6593.98 6
 0 4 -6 149921 6609.04 1
 0 4 -6 145397 6606.25 5
 0 -4 7 552.56 106.512 8
 0 -4 -7 601.304 101.144 7
 0 -4 -7 622.137 88.7488 9
 0 4 -7 634.017 110.931 5
 0 4 7 436.438 98.6715 2
 0 4 7 649.578 95.3192 10
 0 4 7 605.356 98.2898 6
 0 -4 7 536.622 112.643 1
 0 -4 -7 549.03 104.313 1
 0 -4 7 581.601 105.429 11
 0 4 -7 737.786 101.456 12
 0 4 -7 576.021 102.82 1
 0 4 8 9165.33 465.686 10
 0 -4 8 9735.99 492.75 8
 0 4 -8 9234.02 483.451 1
 0 -4 8 9254.3 490.369 1
 0 -4 -8 9550.99 488.053 7
 0 -4 -8 9828.38 485.256 1
 0 -4 8 9038.13 486.109 11
 0 4 -8 9458.05 482.601 5
 0 4 8 9865.11 493.153 2
 0 -4 -8 8335.37 483.294 3
 0 4 -8 9718.17 476.474 12
 0 4 8 9412.33 484.128 6
 0 -4 -8 9068.98 473.889 9
 0 4 9 7608.25 403.468 2
 0 -4 -9 6747.26 390.13 3
 0 -4 9 6634.71 393.008 1
 0 4 -9 7336.59 389.84 5
 0 -4 -9 7205.84 388.091 1
 0 -4 -9 7063.16 379.943 9
 0 4 -9 7137.29 382.999 12
 0 4 9 6694.61 370.796 10
 0 -4 9 6958.07 392.641 8
 0 -4 -9 7401.67 395.078 7
 0 4 -9 6885.4 384.997 1
 0 4 -10 10406.9 549.753 12
 0 -4 -10 11940.1 570.386 1
 0 4 -10 12544.2 554.141 10
 0 4 -10 9184.2 547.948 1
 0 -4 10 9840.71 563.469 1
 0 -4 10 9025.28 550.187 8
 0 -4 -10 11502.8 572.612 7
 0 -4 -10 12558.5 579.531 3
 0 4 -10 10126.9 555.281 11
 0 4 10 12092.6 551.516 10
 0 -4 -11 152644 6714.61 3
 0 4 -11 151120 6704.74 11
 0 -4 -11 138693 6686.42 10
 0 -4 -11 145128 6697.05 1
 0 4 -11 166807 6692.81 10
 0 4 -11 159661 6711.34 1
 0 4 11 164234 6692.01 10
 0 -4 11 141820 6710.88 1
 0 4 -11 146944 6694.03 12
 0 -4 -12 20803.8 1045.08 67
 0 -4 -12 22788.8 1056.42 1
 0 4 12 24563.8 1044.85 10
 0 -4 12 20534.5 1033.18 56
 0 -4 -12 21489 1062.14 3
 0 4 -12 20973.3 1054.86 17
 0 -4 12 21782.7 1068.19 1
 0 4 -12 21483.5 1057.5 13
 0 4 -12 22118.5 1047.04 12
 0 4 -12 21957.9 1054.81 1
 0 -4 12 21205.9 1045.92 70
 0 4 12 23891.3 1035.85 53
 0 -4 -12 22348.5 1048.31 10
 0 -4 12 22628.4 1038.41 24
 0 4 12 23470.3 1045.52 27
 0 4 -12 19386.6 1044.34 71
 0 4 -12 21335.4 1037.46 10
 0 -4 12 21419.4 1057.3 3
 0 -4 12 22884 1024.11 28
 0 -4 12 20785 1017.28 9
 0 -4 -12 20311.4 1034.88 20
 0 4 -12 21997.4 1056.31 11
 0 -4 -12 21572.6 1039.15 38
 0 -4 12 21796.7 1029.31 63
 0 -4 12 22312.7 1029.54 23
 0 4 -12 21975 1061.4 18
 0 -4 13 175761 7911.34 9
 0 -4 -13 181701 7964.03 3
 0 4 13 178467 7905.86 64
 0 -4 13 174805 7954.8 3
 0 4 -13 180495 7950.86 61
 0 4 -13 174386 7952.17 17
 0 4 13 159465 7940.23 32
 0 -4 -13 186564 7948.62 67
 0 -4 -13 166247 7933.96 10
 0 4 -13 185502 7955.59 1
 0 -4 -13 184463 7948.98 1
 0 4 -13 183039 7949.96 71
 0 4 13 193149 7937.93 27
 0 4 -13 181255 7946.09 12
 0 -4 13 181954 7968.72 1
 0 4 -13 179445 7954.36 13
 0 -4 13 181907 7910.21 28
 0 4 -13 189707 7960.92 11
 0 -4 13 178863 7944.48 70
 0 -4 -13 178934 7938.85 38
 0 4 13 185164 7922.09 53
 0 -4 -13 182796 7944.96 66
 0 -4 13 189327 7925.66 63
 0 -4 13 193102 7937.55 24
 0 4 -13 162108 7924.44 10
 0 -4 13 181923 7918.8 23
 0 4 -13 177951 7959.45 18
 0 -4 -13 179626 7934.84 20
 0 -4 14 8335.93 458.873 23
 0 4 -14 8846.48 497.549 13
 0 4 14 8553.15 488.638 15
 0 -4 -14 8471.7 471.94 20
 0 4 -14 8924.22 501.813 18
 0 -4 -14 8393.13 481.275 67
 0 4 14 9365.27 502.346 32
 0 -4 14 8153.43 489.904 3
 0 -4 14 8757.9 453.688 28
 0 4 14 9063.54 453.96 64
 0 4 -14 8147.76 482.917 61
 0 -4 14 8885.62 464.669 63
 0 4 14 8863.3 468.261 53
 0 -4 -14 9169.21 488.526 1
 0 4 -14 8296.91 482.991 71
 0 -4 14 8712.11 487.34 70
 0 4 14 7661.91 461.868 12
 0 4 -14 9087.12 498.763 11
 0 4 14 8739.75 441.3 22
 0 4 -14 7809.5 468.857 10
 0 -4 14 9322.35 477.618 24
 0 -4 14 8537.42 503.95 1
 0 -4 -14 8588.03 499.069 3
 0 4 14 9085.13 481.633 27
 0 4 14 8171.01 487.275 6
 0 -4 -14 7758.85 474.419 10
 0 -4 -14 8705.82 475.649 38
 0 -4 14 8245.2 448.779 9
 0 4 -14 8905.59 495.784 17
 0 -4 -14 7943.08 475.586 9
 0 -4 -14 8673.61 480.394 66
 0 4 -14 9126.88 487.493 12
 0 4 -14 8856.69 493.497 1
 0 4 -15 59444.4 2874.26 1
 0 4 -15 66126.9 2879 12
 0 4 -15 64400.3 2885.77 61
 0 4 -15 61218.2 2880.05 13
 0 4 -15 59345.9 2857.31 10
 0 4 -15 64917 2893.92 11
 0 -4 -15 63681.5 2871.34 66
 0 4 15 68052.9 2866.19 27
 0 -4 -15 66408.4 2892.16 61
 0 -4 15 58073 2888.09 1
 0 4 15 73271.5 2899.34 32
 0 -4 -15 62754.1 2869.72 1
 0 -4 15 69093.7 2863.23 24
 0 4 15 64027.3 2846.65 53
 0 4 15 65981.8 2870.54 41
 0 4 -15 63750 2886.09 17
 0 -4 -15 64453.3 2872.63 39
 0 4 15 63080.7 2885.02 6
 0 -4 15 62935.5 2831.97 28
 0 -4 15 67458.7 2842.85 48
 0 -4 15 65076.5 2846.29 63
 0 4 15 64088.5 2876.34 15
 0 -4 15 58275.2 2828.49 9
 0 -4 15 61522.2 2885.02 3
 0 -4 -15 63353 2863.65 38
 0 4 15 63987 2830.73 64
 0 4 15 63009.8 2819.68 22
 0 -4 -15 60473.9 2857.51 20
 0 4 15 62830.9 2860.43 70
 0 4 15 60952.9 2842.62 12
 0 -4 15 63696.5 2842.98 23
 0 4 15 59578.9 2799.21 34
 0 -4 -15 65397.5 2899.68 3
 0 -4 -15 62329.7 2873.88 67
 0 4 -15 63614.8 2878.59 71
 0 4 -15 61478.9 2888.55 18
 0 -4 -15 58795.8 2864.43 10
 0 -4 15 62761.1 2875.35 70
 0 4 16 28952.3 1366.06 22
 0 -4 -16 31151.2 1424.15 39
 0 4 -16 29805.1 1435.1 61
 0 -4 16 28587.7 1387.42 23
 0 -4 -16 32056 1438.18 55
 0 4 -16 28241.7 1407.98 10
 0 -4 -16 30122.9 1424.51 67
 0 4 -16 30797 1434.88 17
 0 4 -16 26527.6 1427.87 18
 0 4 16 29582.7 1394.18 53
 0 4 16 27586.5 1345.65 34
 0 -4 -16 29739.8 1418.24 1
 0 4 16 29118.9 1430.52 6
 0 4 -16 29333.1 1424.35 71
 0 -4 16 30703.3 1430.81 70
 0 -4 -16 29470.9 1413.51 38
 0 4 -16 29389.2 1427.07 1
 0 -4 -16 31011.6 1421.6 66
 0 -4 -16 29850.2 1445.94 3
 0 -4 16 27526.3 1428.23 3
 0 -4 16 29046.6 1380.08 9
 0 -4 -16 27301.9 1413.17 10
 0 -4 16 30955 1393.25 63
 0 -4 -16 32219.2 1446.71 61
 0 4 16 28907.4 1404.99 27
 0 4 16 31077.9 1413.15 70
 0 4 16 29157.7 1376.95 64
 0 -4 16 32708.9 1415.74 24
 0 4 -16 30251.9 1438.49 13
 0 -4 16 28967.7 1447.47 1
 0 -4 16 31305.1 1388.82 48
 0 4 -16 29984.6 1441.87 11
 0 4 16 30311.3 1412.91 41
 0 4 -16 29284.8 1420.59 12
 0 -4 16 29261.7 1376.91 28
 0 4 16 32458.5 1439 32
 0 4 -17 36738.1 1720.58 17
 0 -4 -17 37056.9 1705.72 66
 0 -4 17 37327.9 1718.81 70
 0 -4 17 35477 1660.93 28
 0 4 17 36840.1 1695 27
 0 4 -17 32457.5 1715.77 11
 0 4 17 37941.2 1697.62 70
 0 -4 -17 40812.8 1732.49 55
 0 -4 -17 36808.1 1710.94 39
 0 4 -17 35014.9 1717.62 61
 0 -4 17 38371.3 1698.76 56
 0 4 -17 36953.2 1725.71 13
 0 4 -17 35281.2 1707.78 71
 0 4 17 36069.4 1650.14 22
 0 -4 17 33923.9 1716.51 3
 0 4 17 40080.4 1727.91 32
 0 4 -17 32844.8 1697.22 12
 0 -4 -17 37851.8 1715.61 67
 0 4 17 32662.2 1626.2 34
 0 -4 -17 39105.7 1732.72 61
 0 -4 17 36369.1 1674.27 63
 0 -4 -17 35329 1702.25 1
 0 -4 17 31452.9 1652.48 9
 0 -4 17 39371.7 1701.89 24
 0 -4 17 38432 1668.99 48
 0 -4 -17 35488 1697.56 38
 0 4 17 36091.6 1662.61 64
 0 -4 17 35766 1673.34 23
 0 -4 18 26469.2 1234.78 28
 0 -4 18 28091.3 1277.78 56
 0 4 -18 25882.6 1297.72 61
 0 4 18 27823.3 1274.11 70
 0 -4 -18 26052.5 1281.71 39
 0 4 18 25146.4 1219.42 22
 0 -4 -18 25266.7 1268.5 38
 0 -4 18 26721.9 1249.55 23
 0 -4 18 28833.1 1278.5 24
 0 4 -18 25580.9 1288.49 17
 0 -4 -18 24993.8 1292.67 61
 0 4 18 25063.7 1231.8 64
 0 -4 -18 27419.4 1283.07 66
 0 -4 -18 24575 1268.3 1
 0 4 18 22841.5 1195.42 34
 0 4 -18 26319.5 1283.89 71
 0 -4 18 27996.4 1255.85 63
 0 4 -18 24849.2 1288.46 13
 0 -4 18 27995.7 1244.11 48
 0 -4 18 27164.6 1295.17 70
 0 4 18 27151.9 1290.44 32
 0 -4 -18 25518.2 1288.1 55
 0 4 -19 102.224 114.448 13
 0 -4 19 67.8433 136.729 70
 0 -4 -19 120.849 108.704 55
 0 4 19 243.439 133.067 32
 0 -4 -19 140.734 112.214 39
 0 -4 19 155.571 131.52 56
 0 4 -19 65.4713 92.2964 71
 0 -4 -19 85.9978 86.1489 65
 0 4 -19 -10.5057 105.982 61
 0 4 19 88.8687 117.317 70
 0 -4 19 40.0556 89.9377 63
 0 -4 19 103.982 79.3484 48
 0 4 19 5.44589 100.31 22
 0 -4 -19 26.9454 91.2808 66
 0 -4 19 134.287 123.21 24
 0 -4 19 184.19 124.804 23
 0 -4 19 35.915 98.0808 28
 0 4 -19 109.433 112.037 17
 0 4 -20 2734.32 250.321 71
 0 -4 20 2797.59 222.4 48
 0 -4 20 2507.11 222.195 28
 0 4 20 2225.83 210.886 22
 0 -4 -20 2759.27 243.688 65
 0 4 -20 2693.56 271.845 13
 0 -4 20 2486.65 223.55 63
 0 -4 20 2628.96 249.679 24
 0 -4 20 3162.93 267.767 56
 0 4 -20 2721.68 264.654 17
 0 4 -20 2646.64 261.449 61
 0 4 20 3191.89 272.489 32
 0 -4 -20 2691.62 253.271 39
 0 -4 20 2699.58 278.164 70
 0 -4 -20 3010.69 273.1 55
 0 -4 20 2544.94 236.599 23
 0 -4 -20 2968.06 253.354 66
 0 4 20 2598.75 247.561 70
 0 4 21 434.821 155.031 32
 0 -4 21 739.355 164.484 24
 0 -4 -21 642.022 137.729 65
 0 4 -21 723.347 160.709 13
 0 4 21 554.878 136.677 22
 0 -4 21 867.619 127.93 48
 0 4 -21 653.707 141.036 71
 0 -4 21 941.776 181.331 56
 0 -4 21 721.557 141.388 28
 0 -4 21 720.034 136.533 63
 0 -4 21 735.003 159.724 23
 0 -4 -21 626.777 157.357 39
 0 -4 -21 697.674 140.074 66
 0 4 -21 898.449 173.179 17
 0 4 21 749.043 166.2 70
 0 -4 -21 771.085 172.019 55
 0 -4 21 819.842 202.353 70
 0 4 -21 899.813 170.739 61
 0 4 -22 5606.64 423.012 61
 0 -4 22 6258.42 414.957 24
 0 4 -22 5869.96 424.862 17
 0 -4 22 6155.41 367.282 48
 0 4 -22 5773.06 409.895 71
 0 4 -22 5787.03 433.806 13
 0 -4 -22 5257.07 392.152 66
 0 -4 -22 5683.29 420.115 39
 0 -4 22 5225.46 364.414 28
 0 -4 22 5786.96 409.349 56
 0 -4 22 6079.63 398.824 23
 0 -4 -22 6063.73 410.416 65
 0 4 22 5708.94 405.766 70
 0 -4 -22 5981.79 434.176 55
 0 4 22 5507.69 411.481 32
 0 -4 22 6049.33 380.322 63
 0 4 22 6037.82 423.438 73
 0 4 -23 10844.5 643.91 71
 0 -4 -23 11377.5 670.666 39
 0 -4 23 10381.7 611.144 23
 0 4 -23 10991.3 669.294 61
 0 -4 -23 10174.1 648.631 19
 0 -4 -23 11087.5 670.874 55
 0 -4 23 10773 586.669 48
 0 4 23 11150.9 660.947 73
 0 -4 23 10518.9 601.887 63
 0 4 -23 11327.5 668.116 13
 0 -4 23 11434.1 652.864 56
 0 -4 23 10737.9 644.357 50
 0 4 23 10862.7 641.704 70
 0 4 -23 10949.6 661.637 17
 0 -4 23 9703.66 588.152 28
 0 -4 -23 11927.2 654.525 65
 0 -4 23 11453.7 643.009 24
 0 -4 -23 11205.6 641.103 66
 0 4 23 10591.7 638.603 32
 0 -4 -24 11418.6 710.371 55
 0 4 -24 12501.7 714.344 13
 0 -4 -24 11864.9 681.952 65
 0 -4 24 10771.4 675.995 50
 0 4 -24 12250.2 713.06 61
 0 4 24 12364.5 697.895 73
 0 -4 24 12477.3 696.571 56
 0 4 -24 11473 679.809 71
 0 4 -24 10319.9 648.31 15
 0 4 24 12044.3 686.985 32
 0 -4 -24 11473 693.581 19
 0 -4 -24 11086.7 695.9 39
 0 -4 24 12514 688.452 24
 0 4 24 11547.2 674.413 70
 0 4 -24 11651.4 692.115 17
 0 -4 24 11141 635.937 63
 0 -4 -24 11181.2 666.614 66
 0 -4 -24 12217.9 716.427 18
 0 -4 -25 3481.49 330.708 18
 0 -4 -25 3560.14 290.802 66
 0 4 25 3082.94 292.34 32
 0 -4 25 3435.17 309.64 24
 0 4 -25 3120.18 288.242 71
 0 -4 -25 3449.46 299.71 65
 0 -4 25 3122.05 299.134 50
 0 -4 25 3442.29 323.066 56
 0 4 -25 3200.57 314.257 61
 0 4 25 3478.45 308.235 70
 0 4 -25 3049.59 310.71 13
 0 4 -25 3363.73 309.208 17
 0 4 25 3088.25 302.812 73
 0 -4 25 2840.65 259.428 63
 0 -4 -25 3337.84 333.122 55
 0 -4 -25 2971.02 301.206 19
 0 4 -25 3253.44 275.902 15
 0 4 -26 54.876 98.8278 15
 0 4 -26 110.371 130.735 17
 0 -4 26 305.114 190.651 56
 0 -4 -26 161.014 152.881 18
 0 4 26 194.929 149.973 70
 0 -4 -26 151.275 122.446 65
 0 -4 26 239.078 108.841 63
 0 4 -26 317.228 146.27 61
 0 4 -26 132.85 112.565 71
 0 4 26 117.006 141.417 73
 0 -4 26 272.893 161.824 24
 0 -4 -26 -10.3757 90.1107 66
 0 4 26 140.49 125.94 32
 0 -4 -26 12.6332 122.798 19
 0 -4 26 165.31 127.509 50
 0 -4 -27 53.6585 142.884 18
 0 4 27 -34.423 126.125 73
 0 -4 27 59.973 188.146 56
 0 -4 -27 88.2883 126.249 19
 0 4 -27 97.8036 185.004 62
 0 4 -27 36.3735 140.393 17
 0 4 27 43.6803 146.408 70
 0 4 27 20.9708 116.654 32
 0 -4 27 88.5055 143.382 24
 0 -4 -27 34.9416 114.86 65
 0 4 -27 21.6567 100.965 71
 0 -4 27 70.6003 118.646 50
 0 -4 -27 103.109 109.115 13
 0 -4 -27 39.8468 91.2992 66
 0 4 -27 -78.6014 129.187 61
 0 -4 28 4330.64 358.952 50
 0 -4 -28 4772.71 390.338 18
 0 4 -28 4708.43 383.267 61
 0 4 28 4383.14 357.941 70
 0 4 28 4631.92 345.375 32
 0 -4 -28 4684.83 384.975 19
 0 -4 28 5146.76 408.327 56
 0 4 -28 4433.27 405.313 62
 0 4 -28 4448.15 363.478 17
 0 4 28 4200.18 351.221 73
 0 4 -28 4176.7 336.385 71
 0 -4 -28 4006.8 347.406 65
 0 -4 28 4752.41 370.87 24
 0 -4 -28 4361.08 332.586 13
 0 -4 -29 1158.13 163.124 13
 0 4 29 1350.72 209.263 70
 0 -4 29 1159.77 228.418 56
 0 4 -29 1333.45 201.007 61
 0 -4 -29 1208.71 193.037 19
 0 -4 29 1051.29 179.493 50
 0 4 -29 924.647 154.282 71
 0 -4 29 1183.05 200.259 24
 0 4 -29 1176 226.104 62
 0 4 29 1125.17 180.961 73
 0 -4 -29 1050.65 204.035 18
 0 -4 30 6318.34 425.203 24
 0 4 -30 6223.96 433.585 61
 0 4 30 5914.2 399.485 73
 0 -4 30 6055.02 443.673 56
 0 -4 -30 6457.42 448.446 18
 0 4 30 6586.85 426.536 70
 0 4 -30 5679.81 386.558 71
 0 -4 -30 6087.45 428.272 19
 0 -4 -30 5376.58 452.602 61
 0 -4 -30 5395.53 377.662 13
 0 -4 30 5954.48 414.58 50
 0 4 -30 5473.62 447.965 62
 0 -4 -31 620.114 150.281 19
 0 -4 -31 728.696 182.653 61
 0 4 -31 646.467 196.932 62
 0 -4 31 433.339 129.332 50
 0 -4 -31 771.83 167.086 18
 0 -4 31 773.528 158.393 24
 0 4 -31 652.094 145.383 61
 0 4 31 671.676 158.229 70
 0 -4 31 611.151 189.3 56
 0 -4 -32 9739.4 598.697 61
 0 4 -32 9856.38 569.026 61
 0 -4 -32 9240.41 569.612 18
 0 4 32 9062.28 545.66 70
 0 -4 32 9448.15 544.438 24
 0 -4 32 9366.15 571.405 56
 0 -4 33 1588.71 200.868 56
 0 -4 -33 1327.87 174.499 18
 0 4 -33 1323.09 169.244 61
 0 -4 -33 1327.94 198.077 61
 0 4 33 1372.67 167.503 70
 0 -4 33 1417.98 160.521 24
 0 4 34 1644.13 219.14 50
 0 4 -34 1641.74 170.034 61
 0 -4 34 1744.53 189.885 56
 0 -4 -34 1580.81 174.253 18
 0 -4 -34 1629.58 195.932 61
 0 4 34 1787.82 170.815 70
 0 -4 -35 3974.64 282.543 62
 0 4 35 5668.25 353.446 50
 0 -4 -35 5356.07 332.439 61
 0 -4 35 4723.06 301.206 56
 0 4 35 4458.84 282.937 70
 0 -4 35 5496.55 345.516 70
 0 4 35 4871.87 301.349 26
 0 4 -35 4232.43 287.036 61
 0 -4 -36 2021.95 176.034 61
 0 -4 36 1940.19 182.991 70
 0 4 36 2104.42 189.678 50
 0 -4 37 540.69 86.5454 70
 0 5 0 72.7574 103.574 7
 0 -5 0 274.286 86.1448 5
 0 -5 0 181.666 78.7765 6
 0 5 0 192.281 85.3577 6
 0 5 0 164.835 92.1966 5
 0 -5 1 167532 6850.6 6
 0 5 1 153338 6865.87 7
 0 5 1 156886 6855.25 6
 0 -5 1 165662 6866.47 1
 0 -5 -1 169402 6852.74 6
 0 5 -1 148340 6849.75 6
 0 -5 -1 154689 6867.07 5
 0 5 -1 153791 6865.62 7
 0 5 -1 146924 6838.31 4
 0 5 1 152207 6861.01 5
 0 -5 1 151910 6864.04 5
 0 5 -1 156127 6862.39 5
 0 -5 2 1801.6 152.987 5
 0 -5 -2 1717.01 128.319 6
 0 -5 2 1626.15 143.609 1
 0 5 -2 1834.79 131.947 4
 0 5 2 1574.8 145.966 7
 0 5 -2 1860.13 150.854 5
 0 -5 -2 1526.2 149.811 5
 0 -5 -2 1467.24 122.389 4
 0 -5 2 1846.64 132.908 6
 0 5 2 1530.96 138.838 6
 0 5 -3 73.061 63.6989 4
 0 5 -3 186.48 75.3489 5
 0 -5 -3 125.164 70.8946 6
 0 -5 -3 99.3331 67.3273 4
 0 5 3 73.5785 79.6561 7
 0 5 3 87.2272 69.4883 6
 0 -5 -3 133.8 84.9067 5
 0 5 3 49.0983 61.2145 10
 0 -5 3 54.2901 81.0586 5
 0 -5 3 73.511 77.5503 1
 0 -5 3 148.509 64.4254 6
 0 -5 4 77776.2 3299.37 6
 0 5 -4 74888 3313.81 5
 0 -5 -4 74245.8 3319.87 5
 0 -5 -4 74638.6 3318.95 7
 0 5 -4 72341.1 3303.55 12
 0 5 4 74178.6 3284.39 10
 0 -5 4 75104.8 3321.65 11
 0 -5 -4 73028.7 3295.85 4
 0 5 4 74681.1 3311.87 6
 0 5 5 1579.48 115.766 10
 0 5 -5 1112.34 123.274 12
 0 -5 -5 1240.33 133.834 7
 0 5 5 1301.5 134.284 2
 0 5 -5 1247.15 131.194 5
 0 -5 -5 1390.33 140.89 5
 0 -5 5 1154.55 111.764 6
 0 5 5 1311.55 129.936 6
 0 -5 5 1026.05 134.75 11
 0 -5 -5 1325.77 121.676 9
 0 5 6 41498.8 1812.66 10
 0 5 -6 41579.3 1832.16 12
 0 -5 -6 39951.6 1842.93 7
 0 5 6 38109.2 1833.9 2
 0 -5 -6 39753 1823.62 9
 0 -5 6 41243.7 1849.58 11
 0 5 -6 38951.3 1834.88 5
 0 5 6 41152.6 1839.95 6
 0 -5 6 40442.7 1821.82 6
 0 -5 6 41758.2 1847.93 8
 0 5 7 10303.1 480.084 10
 0 -5 7 9298.46 505.704 11
 0 -5 7 9845.57 510.439 8
 0 5 7 8859.31 497.035 2
 0 5 -7 9400.13 493.499 12
 0 -5 -7 9750.88 506.675 1
 0 5 -7 9625.04 499.075 5
 0 5 7 10031.8 505.634 6
 0 -5 7 9263.16 482.165 6
 0 -5 -7 9857.26 487.29 9
 0 -5 -7 9307.53 501.389 7
 0 -5 -8 5634.18 338.796 1
 0 -5 -8 5808.41 325.231 9
 0 5 8 6211.75 322.006 10
 0 5 -8 5769.57 331.131 12
 0 -5 8 6013.82 350.095 8
 0 5 8 5684.63 339.006 6
 0 5 -8 5575.05 331.525 5
 0 -5 8 5232.83 338.624 11
 0 -5 8 5757.7 322.764 6
 0 5 -8 6234.53 345.535 1
 0 -5 -8 5962.53 343.121 7
 0 -5 8 5749.2 345.85 1
 0 5 8 5704.96 338.851 2
 0 5 9 22842.4 1082.85 10
 0 5 -9 23724 1105.73 5
 0 -5 -9 21619.1 1108.07 3
 0 5 9 24261.6 1113.99 6
 0 5 -9 24043.9 1110.64 1
 0 5 9 23547.4 1114.25 2
 0 -5 -9 24547.8 1098.93 9
 0 -5 -9 23539.1 1113.14 7
 0 -5 9 23603.4 1115.65 8
 0 5 -9 23964.5 1100.78 12
 0 -5 9 21902.4 1084.24 6
 0 -5 9 22524.4 1115.15 1
 0 -5 -9 23994 1112.87 1
 0 -5 9 22521.7 1110.53 11
 0 5 10 5127.43 323.733 10
 0 -5 10 5843.05 322.371 28
 0 5 -10 5294.03 336.58 5
 0 5 -10 5962.83 343.451 12
 0 -5 -10 5967.36 337.289 9
 0 -5 10 5315.08 349.081 1
 0 5 -10 6205.11 353.914 1
 0 -5 10 5959.53 335.146 24
 0 -5 -10 5848.58 354.499 3
 0 -5 -10 5861.49 346.025 1
 0 5 10 5803.09 349.263 6
 0 -5 -10 5747.88 353.273 7
 0 5 10 5523.6 351.7 2
 0 -5 10 5797.3 327.685 63
 0 -5 -10 5860.73 332.432 38
 0 -5 10 5851.05 354.399 8
 0 5 -10 6138.67 352.858 17
 0 -5 -11 31452.6 1490.15 5
 0 5 -11 34762 1467.21 10
 0 -5 -11 32492.8 1485.78 1
 0 5 11 32376.6 1455.81 53
 0 5 11 33225.9 1491.86 32
 0 5 -11 29870.8 1474.77 5
 0 -5 11 30288.8 1487.07 8
 0 -5 -11 30760.1 1465.78 20
 0 5 11 29926.1 1485.66 6
 0 -5 11 32815.4 1465.24 63
 0 5 -11 31454 1486.55 17
 0 5 -11 30603 1482.51 1
 0 -5 -11 30868.7 1461.95 31
 0 -5 -11 32832.1 1483.93 66
 0 -5 -11 31811.6 1495.39 3
 0 -5 -11 32308.5 1494.98 7
 0 -5 -11 29151.2 1461.9 68
 0 -5 11 30568.1 1474.7 70
 0 5 11 31363.4 1460.79 10
 0 5 -11 31471.2 1486.44 71
 0 5 -11 32343.9 1479.12 12
 0 -5 11 31845.9 1452.42 28
 0 -5 11 30975.2 1464.36 56
 0 -5 11 29522.2 1491.18 1
 0 -5 11 34154.6 1468.06 48
 0 -5 -11 33464.8 1477.65 9
 0 -5 -12 69561.4 3056.4 1
 0 -5 -12 66134.6 3043.2 9
 0 5 -12 65166.2 3029.21 36
 0 -5 -12 70568.9 3042.83 20
 0 -5 -12 69456.8 3070.66 3
 0 -5 12 69760.7 3029.5 48
 0 -5 12 68403.3 3063.31 8
 0 5 -12 64922 3048.03 5
 0 5 -12 67683.9 3058.5 17
 0 5 -12 69584.1 3033.73 10
 0 5 12 73815.5 3038.82 10
 0 5 12 71448.6 3027.24 53
 0 -5 -12 63678.8 3044.52 66
 0 5 -12 66662.3 3054.89 71
 0 5 12 64142.1 3053.5 32
 0 -5 12 69400.3 3032.73 63
 0 -5 -12 70978.9 3072.29 7
 0 5 12 61081.8 3051.38 6
 0 -5 -12 64956.4 3030.55 31
 0 5 -12 65298.6 3045.93 61
 0 5 12 68574.8 3055.96 15
 0 5 -12 63278.5 3049.51 1
 0 -5 12 65377.7 3045.65 70
 0 -5 12 67965.2 3072.3 1
 0 -5 -12 71307.1 3069.97 5
 0 -5 12 66630.1 3017.3 28
 0 -5 12 67247.2 3036.01 56
 0 5 -12 69071 3047.69 12
 0 5 -13 11749.2 603.537 36
 0 5 -13 10675.6 598.553 10
 0 -5 13 11079.5 608.808 24
 0 5 -13 12499.9 636.779 1
 0 -5 -13 12024.5 614.475 20
 0 5 -13 12117.2 629.954 71
 0 -5 -13 12033.3 626.748 1
 0 -5 13 11403 620.348 70
 0 5 13 9996.4 612.92 41
 0 5 13 10010.2 622.44 32
 0 -5 -13 12190.5 643.504 7
 0 -5 13 12281.8 599.402 28
 0 -5 -13 13208.7 631.712 66
 0 5 13 11479.9 580.749 64
 0 5 13 11475.3 626.398 15
 0 -5 13 10637.5 579.908 9
 0 5 13 12522.2 612.295 10
 0 5 -13 11253.2 617.326 61
 0 -5 13 12027.2 605.364 63
 0 5 13 12789.5 609.338 53
 0 -5 13 11065.3 629.143 3
 0 5 13 12370.7 622.943 27
 0 -5 13 12477.9 618.844 56
 0 -5 13 11821.9 604.475 23
 0 5 -13 11193.1 622.76 5
 0 -5 -13 11535.3 636.459 3
 0 5 -13 11469.9 630.207 17
 0 -5 13 11960.1 647.369 1
 0 5 -13 11327.4 619.568 12
 0 -5 13 13198.2 609.179 48
 0 -5 -13 11214.5 620.369 67
 0 -5 14 44372.7 2127.37 9
 0 5 -14 41238.9 2145 10
 0 -5 14 50653.5 2170.89 24
 0 5 -14 45381.6 2178.93 1
 0 -5 14 44415.1 2191.69 1
 0 5 -14 47909.7 2187.38 13
 0 -5 -14 49123.7 2166.83 20
 0 -5 14 51976.2 2156.36 48
 0 5 14 49060.7 2148.22 53
 0 5 14 46488.7 2163.29 35
 0 5 -14 47449.9 2176.1 12
 0 5 14 46526.4 2113.17 22
 0 5 -14 45170.3 2147.2 36
 0 -5 14 48743.1 2180.16 70
 0 -5 -14 50628.9 2206.75 3
 0 -5 14 50361.3 2159.4 63
 0 -5 -14 48175.3 2177.19 1
 0 -5 -14 48558.3 2199.71 7
 0 5 -14 44951.3 2177.23 5
 0 5 -14 46768.6 2176 61
 0 -5 14 47324.2 2147.3 23
 0 -5 14 47353 2138.36 28
 0 -5 -14 49148.3 2175.96 66
 0 -5 -14 46232.1 2172.49 67
 0 5 14 41312.1 2163.19 41
 0 5 14 46765.4 2126.15 64
 0 5 -14 49911.2 2190.34 17
 0 -5 14 45109.2 2183.52 3
 0 -5 14 50460.7 2168.8 56
 0 5 14 46034 2179.04 15
 0 5 -14 48598.3 2184.97 71
 0 5 14 51337.6 2170.2 27
 0 5 14 40400.3 2169.23 32
 0 5 15 100.958 81.0728 12
 0 5 -15 101.631 82.4349 5
 0 5 15 171.895 112.357 41
 0 -5 15 103.023 92.3156 28
 0 -5 -15 155.734 91.8103 66
 0 5 15 93.1971 114.797 53
 0 5 15 115.58 122.81 27
 0 5 15 181.327 91.9364 64
 0 -5 15 17.7404 80.7694 3
 0 -5 15 217.018 117.21 70
 0 -5 15 111.107 83.273 48
 0 -5 -15 186.851 91.2475 20
 0 5 -15 122.154 89.1428 71
 0 5 -15 90.2685 85.3101 10
 0 -5 -15 188.864 94.6885 7
 0 -5 -15 125.704 86.0126 1
 0 -5 15 241.29 106.235 1
 0 -5 15 141.038 109.428 56
 0 -5 -15 161.165 89.5418 38
 0 5 -15 109.935 87.0198 12
 0 5 -15 204.824 93.9881 61
 0 5 15 80.7929 100.168 15
 0 -5 -15 118.857 89.3728 67
 0 5 -15 186.15 101.31 17
 0 -5 15 83.4457 106.581 24
 0 5 15 49.5593 85.6926 35
 0 5 15 142.836 78.9947 22
 0 -5 15 126.749 110.523 23
 0 5 15 111.049 127.113 32
 0 -5 -15 168.647 97.3309 3
 0 -5 15 129.392 89.9249 63
 0 -5 15 236.543 65.3146 9
 0 5 -15 214.03 102.501 13
 0 5 -15 42.3305 85.548 1
 0 5 -15 50.4079 75.5388 36
 0 -5 16 5043.93 327.937 28
 0 -5 -16 5144.58 349.092 20
 0 -5 -16 5483.04 357.842 38
 0 -5 16 6040.23 362.9 24
 0 -5 -16 5470.25 360.157 66
 0 -5 -16 5450.17 363.232 67
 0 5 16 5923.41 389.491 32
 0 5 16 5531.11 352.092 70
 0 -5 -16 5650.5 373.003 61
 0 -5 16 4731.12 358.418 3
 0 5 -16 5172.85 368.612 13
 0 -5 16 5562.53 346.845 23
 0 -5 -16 5566.98 358.191 39
 0 5 16 5282.65 360.317 27
 0 5 16 5010.16 304.351 22
 0 5 -16 5038.78 330.46 36
 0 -5 16 5341.35 338.662 63
 0 5 -16 5079.72 361.011 5
 0 5 16 5630.51 366.703 41
 0 5 16 4850.84 315.443 64
 0 -5 16 5731.43 338.416 48
 0 5 -16 5092.28 358.159 71
 0 5 -16 5546.62 369.617 61
 0 -5 16 5233.04 365.414 70
 0 5 -16 5315.24 368.196 17
 0 5 -16 5397.51 361.7 12
 0 -5 -16 5138.5 352.083 1
 0 5 16 5334.17 364.481 15
 0 5 16 5341 346.653 53
 0 5 -17 45.7188 91.532 71
 0 -5 -17 27.0896 90.3921 67
 0 5 -17 57.5192 102.776 17
 0 5 17 38.2615 92.656 64
 0 -5 -17 50.4533 97.3747 38
 0 -5 17 -20.5113 90.5401 63
 0 -5 17 -86.8119 121.931 24
 0 -5 -17 237.306 109.324 66
 0 -5 17 40.7429 121.143 23
 0 5 -17 91.1767 91.2709 12
 0 5 17 -68.857 147.423 27
 0 5 17 32.2207 72.8571 34
 0 5 17 142.901 112.187 70
 0 5 -17 27.2734 70.2392 36
 0 -5 -17 68.2974 90.3475 39
 0 5 17 -57.7879 102.197 41
 0 -5 17 92.7086 123.789 70
 0 -5 -17 35.0201 74.401 1
 0 5 17 -9.42149 131.393 32
 0 -5 -17 148.639 103.356 55
 0 5 -17 -28.7905 90.2399 61
 0 5 17 14.0743 78.5047 22
 0 -5 17 -60.6714 104.933 28
 0 5 -17 87.7664 112.923 13
 0 5 17 17.4844 91.2917 15
 0 -5 17 64.0532 81.9238 48
 0 -5 -17 -9.73045 99.5284 61
 0 5 -18 6229.67 427.928 61
 0 -5 -18 6423.03 432.211 61
 0 -5 18 6409.52 433.364 70
 0 5 18 5455.37 367.652 64
 0 -5 -18 6691.86 425.276 67
 0 -5 18 6309.89 386.275 28
 0 -5 18 6775.73 399.283 63
 0 -5 18 6527.7 386.587 48
 0 5 -18 6008.47 416.668 71
 0 -5 18 6726.91 409.506 50
 0 -5 -18 7135.48 439.333 55
 0 5 18 6094.31 419.095 27
 0 -5 18 6856.49 421.349 24
 0 5 -18 6712.29 435.382 17
 0 5 -18 6170.13 383.764 36
 0 5 18 6131.53 403.877 41
 0 5 18 6666.25 444.981 32
 0 -5 -18 6324.62 413.322 66
 0 5 18 5705.11 356.271 22
 0 -5 -18 6202.76 416.644 39
 0 -5 18 5935.47 396.839 23
 0 -5 -18 6291.78 415.755 38
 0 5 18 7072.19 412.463 70
 0 5 -18 6493.72 437.349 13
 0 5 -19 392.765 149.176 13
 0 5 19 358.945 109.726 22
 0 5 -19 252.269 108.882 61
 0 5 19 249.248 133.233 70
 0 -5 19 315.018 147.522 70
 0 -5 -19 286.143 130.804 61
 0 5 19 244.692 144.862 32
 0 -5 -19 262.962 114.08 66
 0 -5 -19 263.434 114.282 39
 0 5 -19 202.072 87.6216 36
 0 -5 19 360.892 112.459 48
 0 -5 -19 305.462 123.931 55
 0 -5 19 176.335 129.916 24
 0 -5 19 330.059 118.33 63
 0 5 -19 302.706 112.949 71
 0 -5 19 195.104 120.116 28
 0 5 -19 448.205 144.783 17
 0 -5 19 318.022 107.958 50
 0 -5 19 296.15 138.517 23
 0 -5 -19 341.946 127.961 38
 0 -5 -20 289.803 137.95 55
 0 5 20 312.721 134.446 70
 0 5 -20 294.037 95.3618 36
 0 -5 20 454.944 118.024 48
 0 5 -20 354.924 146.358 13
 0 5 -20 252.329 119.091 71
 0 -5 20 399.177 159.234 70
 0 5 20 263.721 150.457 32
 0 -5 -20 325.277 117.156 66
 0 -5 20 438.936 150.972 24
 0 -5 20 255.14 133.377 28
 0 -5 -20 260.438 111.417 65
 0 5 20 251.406 110.897 22
 0 -5 -20 384.299 141.976 61
 0 -5 20 321.667 124.146 63
 0 -5 -20 383.472 132.608 39
 0 -5 20 215.276 105.585 50
 0 5 -20 278.145 115.055 61
 0 5 -20 389.39 123.479 15
 0 5 -20 189.87 121.227 17
 0 -5 20 279.851 149.056 23
 0 -5 21 344.281 118.427 50
 0 -5 21 167.99 150.366 23
 0 -5 -21 186.119 122.018 39
 0 5 -21 185.962 141.97 17
 0 -5 21 183.125 151.922 56
 0 -5 21 141.616 99.381 48
 0 5 21 42.422 106.346 22
 0 -5 21 221.203 162.523 70
 0 -5 21 228.445 114.446 63
 0 5 -21 119.432 149.433 13
 0 -5 -21 183.97 135.007 61
 0 -5 -21 84.2682 111.707 66
 0 -5 21 148.468 130.161 28
 0 5 -21 141.593 109.268 71
 0 -5 -21 117.375 125.234 55
 0 5 21 152.038 148.147 32
 0 5 -21 190.654 118.23 15
 0 5 21 199.764 133.378 70
 0 5 -21 145.672 115.318 61
 0 -5 -21 225.714 108.773 65
 0 -5 21 303.84 152.994 24
 0 -5 -22 13956.4 772.445 66
 0 -5 22 12936.1 732.822 63
 0 -5 -22 14370.3 814.231 61
 0 5 -22 13276.8 771.347 71
 0 5 22 14460.2 762.004 70
 0 -5 22 14320.8 782.563 56
 0 5 -22 13629.2 755.582 15
 0 -5 22 14315 768.751 50
 0 -5 22 14193 808.118 70
 0 -5 -22 14161.6 790.429 39
 0 -5 22 12230 717.868 28
 0 -5 22 13273.1 721.061 48
 0 -5 -22 13808.5 761.244 65
 0 -5 -22 13789.2 798.74 55
 0 5 -22 13113.9 786.826 61
 0 5 -22 13995.4 796.792 17
 0 5 22 14109.1 784.811 32
 0 -5 22 14784.8 782.775 24
 0 5 23 24.3161 135.458 73
 0 5 23 214.695 155.956 32
 0 -5 23 203.251 110.092 48
 0 -5 23 105.822 112.225 50
 0 5 23 -9.79917 132.122 70
 0 -5 23 354.456 193.894 70
 0 5 -23 220.474 145.322 61
 0 -5 23 52.2053 113.99 63
 0 -5 -23 279.483 164.906 61
 0 5 -23 117.741 117.531 15
 0 -5 23 213.042 178.127 56
 0 5 -23 271.092 150.497 17
 0 -5 -23 209.349 119.853 66
 0 -5 -23 155.501 154.517 39
 0 -5 23 182.352 164.342 24
 0 -5 -23 191.388 142.136 55
 0 -5 -23 331.477 120.591 65
 0 5 -23 205.661 123.489 71
 0 -5 -24 135.784 153.726 39
 0 -5 24 166.1 160.353 24
 0 -5 -24 242.399 116.081 65
 0 -5 24 299.471 195.639 70
 0 -5 24 158.023 107.078 48
 0 -5 24 174.123 183.874 56
 0 -5 24 97.1823 115.273 50
 0 5 -24 250.473 148.365 17
 0 -5 24 124.326 121.244 63
 0 5 24 159.954 167.154 73
 0 -5 -24 262.879 145.556 55
 0 5 24 170.642 152.715 32
 0 5 24 201.158 137.799 70
 0 5 -24 184.577 134.114 61
 0 5 -24 356.294 164.844 62
 0 5 -24 207.813 130.939 71
 0 5 -24 97.9467 111.163 15
 0 -5 -24 286.297 152.525 18
 0 -5 -24 170.68 133.408 19
 0 -5 -24 99.7159 115.948 66
 0 5 -25 57078.8 2724.18 61
 0 5 25 57002.7 2691.17 32
 0 -5 -25 58893.7 2729.79 18
 0 -5 -25 59776.9 2734.91 55
 0 -5 -25 59902 2723.15 39
 0 5 -25 58705.8 2739.79 62
 0 -5 -25 57322.8 2689.51 65
 0 -5 25 57032.7 2653.29 63
 0 5 -25 58848.8 2724.17 17
 0 -5 25 62308.6 2712.15 24
 0 -5 25 59798.6 2734.91 70
 0 -5 25 57612.9 2706.75 56
 0 5 -25 51556.1 2654.47 15
 0 -5 -25 58610.5 2713.05 19
 0 -5 -25 54719.2 2680.6 66
 0 -5 25 54459.9 2678 50
 0 5 -25 56892.7 2695.38 71
 0 5 25 59192.1 2714.54 73
 0 5 25 57825.7 2678.23 70
 0 5 -26 4702.88 384.701 61
 0 -5 26 4187.71 349.444 50
 0 -5 -26 4855.64 369.816 65
 0 -5 26 5024.92 391.361 24
 0 -5 -26 4653.71 384.515 19
 0 -5 -26 4319.76 348.42 66
 0 5 -26 4533.88 361.83 71
 0 5 -26 5263.56 415.261 62
 0 5 26 4105.84 356.087 32
 0 -5 26 5323.91 417.557 56
 0 5 26 5389.94 378.622 70
 0 -5 -26 4632.59 397.143 55
 0 5 26 4708.13 380.257 73
 0 -5 26 4719.57 419.648 70
 0 5 -26 4762.34 347.003 15
 0 -5 -26 4780.37 394.228 18
 0 5 -27 21278.5 1125.09 71
 0 -5 27 24841.8 1164.86 24
 0 -5 -27 19928.4 1095.34 13
 0 -5 -27 22589.9 1134.68 65
 0 -5 27 20080.6 1110.94 50
 0 -5 -27 22737.9 1164.93 18
 0 5 27 19876.1 1108.35 32
 0 -5 27 23790.3 1167.53 56
 0 5 -27 24372.3 1194.94 62
 0 5 -27 21655.5 1155.32 61
 0 -5 -27 22361.2 1151.41 19
 0 -5 27 21663.1 1170.78 70
 0 5 27 22148 1141.66 73
 0 -5 -27 20773.5 1112.29 66
 0 5 27 21255.9 1115.38 70
 0 5 -28 2376.19 239.392 71
 0 -5 -28 2626.02 235.42 13
 0 5 28 2385.45 255.043 70
 0 -5 -28 2350.57 261.749 19
 0 5 28 2587.36 251.252 32
 0 -5 -28 2170.54 269.183 18
 0 -5 28 2655.15 284.779 24
 0 5 28 2816.32 279.944 73
 0 -5 28 2882.86 308.22 56
 0 -5 -28 2466.22 252.125 65
 0 5 -28 2422.65 287.143 62
 0 -5 28 1976.52 303.527 70
 0 5 -28 2276.75 263.84 61
 0 5 29 175.406 129.626 70
 0 -5 29 -11.8664 189.482 56
 0 5 -29 12.9489 146.649 62
 0 5 29 95.0121 126.259 73
 0 5 29 27.6505 103.817 32
 0 -5 29 154.549 159.715 24
 0 -5 -29 104.323 108.257 65
 0 -5 -29 22.785 114.093 19
 0 -5 -29 246.428 143.499 18
 0 5 -29 94.5761 118.39 61
 0 -5 30 10889.3 640.131 56
 0 -5 -30 10155.9 624.964 18
 0 5 30 10425.6 591.857 70
 0 5 -30 9876.57 631.975 62
 0 -5 30 11150.2 623.898 24
 0 5 30 9461.59 585.926 73
 0 5 -30 9559.39 606.006 61
 0 -5 -30 9986.86 608.178 19
 0 -5 31 927.768 178.959 24
 0 5 31 915.838 156.488 70
 0 5 -31 866.359 184.744 62
 0 -5 -31 852.71 161.238 18
 0 -5 31 884.512 199.268 56
 0 5 -31 1015.82 162.572 61
 0 5 31 807.211 141.647 73
 0 -5 -31 691.696 140.394 19
 0 -5 -32 11705.5 645.834 18
 0 5 -32 11036.7 628.214 61
 0 -5 32 11460.1 629.306 24
 0 -5 32 11229.3 650.553 56
 0 5 32 11097.4 613.938 70
 0 5 -32 11076.9 656.358 62
 0 5 -33 3442.18 264.932 61
 0 -5 -33 3536.61 277.714 18
 0 -5 33 3418.57 288.163 56
 0 5 33 3796.9 263.681 70
 0 5 -33 3986.06 304.325 62
 0 -5 33 3465.32 262.523 24
 0 -5 -34 2046.91 187.373 18
 0 5 -34 2297.32 183.862 61
 0 -5 34 2140.6 205.039 56
 0 -5 -34 1921.39 172.768 62
 0 5 34 1983.89 169.613 70
 0 -5 34 2091.57 172.596 24
 0 5 -34 2313.29 215.316 62
 0 5 -35 18590.4 810.345 62
 0 -5 -35 18199.9 814.441 61
 0 5 35 18715.1 792.22 26
 0 -5 -36 140.439 65.7192 61
 0 5 -36 157.015 66.3611 62
 0 -6 0 28440.4 1353 5
 0 6 0 28616.3 1348.03 5
 0 6 0 28398.1 1352.44 7
 0 -6 0 30678.7 1333.15 6
 0 6 0 28635.9 1337.16 6
 0 -6 0 29706.2 1352.13 1
 0 -6 -1 30687.9 1433.28 5
 0 -6 1 30140.1 1426.2 1
 0 6 1 31423.2 1418.66 6
 0 6 -1 29352 1410.45 6
 0 6 1 29996.9 1424.42 5
 0 6 -1 30535.4 1425.51 5
 0 -6 -1 33555.8 1412.09 6
 0 -6 1 30636.6 1430.32 5
 0 6 -1 29894.1 1429.26 7
 0 -6 1 32206.5 1409.86 6
 0 6 1 30783.8 1431.35 7
 0 -6 2 9935 542.907 5
 0 6 -2 10884.1 544.744 5
 0 6 -2 10108.3 515.067 4
 0 -6 -2 11590.9 529.525 6
 0 6 2 10670.4 537.069 6
 0 6 2 9754.34 504.459 10
 0 6 -2 10409.5 546.827 7
 0 -6 2 10848.1 548.141 1
 0 -6 2 11642.8 528.473 6
 0 6 2 10705.5 549.014 7
 0 -6 -2 10493 551.583 5
 0 -6 -3 4219.8 237.31 4
 0 6 -3 4261.29 263.144 5
 0 6 3 3671.24 223.534 10
 0 6 -3 3957.57 236.303 4
 0 -6 3 4343.36 270.717 11
 0 -6 -3 4004.4 266.82 5
 0 -6 3 4178.03 264 1
 0 6 3 4194.14 267.922 7
 0 -6 -3 4170.72 241.98 6
 0 6 3 4104.74 253.712 6
 0 -6 3 3796.78 257.52 5
 0 -6 3 4314.99 242.881 6
 0 6 -4 578.07 85.8465 4
 0 6 4 611.149 96.5323 6
 0 -6 4 522.006 107.977 11
 0 -6 -4 473.682 105.461 5
 0 6 -4 441.211 99.8005 5
 0 -6 -4 630.577 88.2435 4
 0 -6 4 632.048 88.6405 6
 0 -6 4 624.101 112.128 1
 0 6 4 579.492 76.6113 10
 0 6 5 117.644 65.9047 10
 0 -6 5 57.6968 83.5316 11
 0 -6 -5 50.9305 91.4551 5
 0 -6 -5 62.8995 63.7664 4
 0 6 -5 91.8479 72.5852 5
 0 -6 5 93.5459 64.6258 6
 0 6 -5 98.4142 73.5991 12
 0 6 5 102.474 78.9952 6
 0 -6 -5 65.1001 70.1117 9
 0 -6 -6 36763.7 1691.37 7
 0 -6 -6 37388.5 1669.26 9
 0 -6 6 36481 1696.04 11
 0 -6 -6 36381.8 1692.28 5
 0 6 -6 35083.3 1680.25 5
 0 6 -6 37247.4 1678.79 12
 0 6 6 37132.2 1688.17 6
 0 6 6 37912 1650.71 10
 0 -6 6 37156 1663.07 6
 0 -6 -6 37008 1665.86 4
 0 6 6 33069.3 1678.08 2
 0 6 7 28412.3 1353.66 6
 0 6 -7 29782.1 1348 12
 0 -6 -7 28488.6 1330.77 4
 0 6 -7 28225.1 1346.7 5
 0 -6 -7 26225.6 1350.5 5
 0 6 7 30403.2 1320.64 10
 0 6 7 27558.5 1348.96 2
 0 -6 7 30132.2 1366.5 8
 0 -6 7 29510.8 1365.9 11
 0 -6 -7 29684.6 1337.19 9
 0 -6 -7 28821.6 1358.13 7
 0 -6 7 28585.6 1329.08 6
 0 6 8 47713 2099.7 47
 0 6 -8 45244 2097.21 5
 0 -6 8 41394.5 2065.68 28
 0 6 8 44342.7 2097.02 32
 0 6 -8 47518.2 2106.21 71
 0 -6 -8 47288.5 2090.39 9
 0 -6 -8 48808.1 2113.49 1
 0 -6 -8 45269.7 2083.63 31
 0 -6 -8 47522.3 2105.29 66
 0 6 8 44549.6 2100.78 2
 0 -6 8 46499.3 2088.27 24
 0 -6 8 40837.6 2068.4 23
 0 -6 -8 46628.6 2088.66 68
 0 -6 8 50839.3 2124.67 8
 0 -6 8 46207.7 2114.84 11
 0 6 8 46995.5 2071.26 10
 0 -6 8 44799.4 2075.64 6
 0 6 8 43411.3 2076.57 27
 0 -6 8 48191.7 2086.28 48
 0 -6 -8 48357.3 2113.24 7
 0 6 8 48404.8 2111.74 6
 0 6 -8 48142.5 2099.71 12
 0 -6 9 3073.16 226.997 24
 0 -6 -9 3271.76 224.48 31
 0 -6 9 3115.99 225.564 23
 0 -6 9 3242.26 250.801 8
 0 -6 -9 3566.01 229.071 20
 0 6 9 3323.02 239.613 47
 0 6 9 3324.08 219.656 10
 0 -6 9 3562.96 255.913 1
 0 -6 9 3152.69 234.156 70
 0 6 -9 3263.83 237.761 71
 0 6 -9 3329.38 235.535 12
 0 -6 -9 3352.6 244.861 1
 0 -6 9 3176.96 226.862 56
 0 6 9 3223.47 229.609 25
 0 6 9 3265.78 233.008 27
 0 6 -9 3690.29 242.836 15
 0 6 -9 3427.29 231.432 36
 0 -6 9 3215.34 225.259 48
 0 6 9 3330.78 245.175 2
 0 6 9 3642.3 252.475 6
 0 6 -9 3369.33 239.1 5
 0 -6 -9 3385.96 230.955 68
 0 6 9 3602.31 250.262 32
 0 6 9 2840.53 215.727 72
 0 -6 -9 3585.41 231.851 9
 0 -6 9 3097.96 216.923 6
 0 -6 -9 3234.24 234.452 66
 0 -6 -9 3240.55 222.973 49
 0 -6 9 2643.74 233.305 11
 0 -6 -9 3459.93 249.674 7
 0 -6 -10 10092.1 524.655 38
 0 6 -10 9643.19 533.067 12
 0 6 -10 10087.7 534.029 62
 0 6 10 8690.88 516.344 27
 0 -6 -10 9579.25 535.69 66
 0 -6 10 9782.81 520.53 63
 0 6 10 10076.4 535.891 15
 0 6 10 9497.76 542.872 6
 0 -6 10 9773.78 514.03 6
 0 -6 -10 10322.1 525.738 31
 0 6 10 9048.4 507.497 10
 0 -6 10 9798.6 518.277 23
 0 -6 10 9709.75 550.078 1
 0 6 -10 10256.4 527.018 36
 0 -6 -10 10183 547.577 7
 0 6 10 11052.6 549.344 47
 0 6 10 10307 548.115 32
 0 6 10 9710.45 543.961 2
 0 -6 10 9559.55 533.297 70
 0 -6 -10 9761.37 525.803 68
 0 -6 -10 9840.14 551.716 3
 0 -6 -10 10525.6 546.761 1
 0 -6 -10 10284.6 529.383 9
 0 -6 10 9900.36 524.196 56
 0 -6 10 10176.1 551.336 8
 0 6 -10 10135.7 536.348 15
 0 -6 10 10661.2 535.027 24
 0 6 -10 10208.1 542.674 71
 0 -6 10 10016.2 521.177 48
 0 6 -10 9630.88 532.276 5
 0 6 10 9964.76 510.214 53
 0 -6 -11 3252.91 242.127 1
 0 -6 -11 3161.88 228.624 38
 0 -6 -11 2938.28 226.571 9
 0 -6 11 2893.7 226.677 23
 0 -6 11 2981.41 244.019 8
 0 -6 -11 3148.08 237.727 66
 0 -6 -11 3563.69 255.191 7
 0 -6 11 2837.8 211.371 6
 0 6 11 3313.61 226.177 53
 0 6 -11 2994.67 237.681 71
 0 -6 -11 2973.62 223.49 31
 0 6 -11 3094.62 226.037 36
 0 6 -11 4380.17 238.405 10
 0 -6 11 2781.42 230.426 70
 0 -6 11 3125.64 226.251 63
 0 6 11 3415.61 257.759 32
 0 -6 11 3247.41 253.63 1
 0 6 11 2992.04 244.282 2
 0 6 -11 2917.94 230.187 5
 0 6 11 3215.04 239.233 27
 0 -6 11 3279.01 241.333 24
 0 6 11 3017.17 218.174 10
 0 -6 11 2928.71 225.855 56
 0 6 11 3116.61 242.179 15
 0 -6 -11 2855.26 217.216 59
 0 6 11 3088.79 244.221 6
 0 6 -11 2963.73 226.399 61
 0 6 -11 3115.61 232.46 62
 0 -6 -11 3037.25 225.588 68
 0 6 -11 3065.34 236.329 12
 0 6 -11 2851.41 228.939 15
 0 6 -11 2869.85 235.468 17
 0 -6 -11 3499.94 255.924 3
 0 6 11 3207.78 248.391 47
 0 -6 11 3012.74 226.108 48
 0 6 -12 4316.19 295.382 15
 0 6 -12 4175.38 292.495 12
 0 -6 -12 4119.69 296.278 1
 0 6 12 4190.8 319.14 32
 0 6 -12 3960.4 284.484 61
 0 6 -12 4524.21 287.264 36
 0 -6 -12 4317.44 309.984 3
 0 6 12 4346.49 306.063 15
 0 -6 12 4236.2 291.452 24
 0 -6 12 3733.91 264.455 6
 0 6 -12 4507.58 279.107 10
 0 6 -12 4111.99 292.634 62
 0 -6 12 4369.25 282.737 48
 0 6 12 4262.72 255.972 64
 0 -6 -12 4522.6 294.302 9
 0 -6 12 4005.14 284.024 63
 0 -6 -12 4298.99 308.951 5
 0 -6 -12 4193.31 284.609 68
 0 6 12 4056.87 303.246 6
 0 -6 -12 4125.69 280.373 31
 0 -6 -12 4236.52 305.919 7
 0 -6 12 4302.21 290.204 56
 0 6 -12 4448.33 309.679 17
 0 -6 -12 3730.96 269.967 59
 0 -6 12 4165.18 308.537 1
 0 -6 12 4009.47 292.902 70
 0 -6 12 3968.93 300.496 8
 0 6 12 4660.56 288.519 53
 0 -6 -12 3829.17 288.205 66
 0 -6 -12 4134.19 282.795 38
 0 6 -12 4253.96 297.848 5
 0 6 -12 4449.34 301.877 71
 0 -6 12 4458.04 288.77 28
 0 6 12 3927.46 282.943 35
 0 6 12 4384.8 276.648 10
 0 -6 -13 137489 6108.29 5
 0 -6 -13 126756 6069.36 38
 0 -6 13 125638 6052.53 6
 0 -6 -13 136063 6082.17 9
 0 6 13 139435 6080.51 35
 0 -6 13 133273 6050.68 28
 0 -6 -13 136713 6113.63 3
 0 -6 13 141957 6071.1 48
 0 6 13 150926 6070.16 10
 0 6 -13 142394 6102.28 17
 0 6 -13 140350 6070.72 36
 0 6 13 136105 6106.4 6
 0 6 13 141685 6054.27 53
 0 6 13 143300 6096.39 15
 0 -6 13 136493 6086.21 70
 0 6 13 136204 6028.81 64
 0 -6 13 139041 6076.32 56
 0 6 -13 128981 6082.37 5
 0 6 -13 140938 6085.93 15
 0 6 -13 125271 6052.77 10
 0 -6 -13 140372 6110.25 7
 0 -6 -13 130580 6071.11 20
 0 6 -13 139582 6090.02 12
 0 -6 13 130748 6106.26 1
 0 6 13 127707 6090.91 32
 0 -6 13 136871 6067.49 63
 0 -6 -13 144164 6097.48 1
 0 -6 -13 147158 6095.38 66
 0 6 -13 142797 6099.23 71
 0 -6 -13 136494 6064.41 59
 0 6 -13 135989 6083.67 61
 0 6 -13 138398 6093.21 62
 0 6 14 945.278 154.627 53
 0 6 -14 715.214 125.314 61
 0 -6 14 617.69 106.418 6
 0 -6 14 994.936 133.482 48
 0 6 14 977.017 144.254 35
 0 -6 14 691.176 133.368 3
 0 -6 14 1007.49 146.771 63
 0 6 -14 898.891 141.434 15
 0 6 14 859.736 150.963 15
 0 6 -14 622.281 129.846 62
 0 6 14 943.318 180.249 32
 0 -6 -14 875.937 139.15 66
 0 -6 -14 1036.18 144.483 1
 0 6 14 871.857 169.026 41
 0 -6 14 844.657 139.944 28
 0 -6 14 1042.06 156.357 70
 0 6 -14 960.401 139.255 12
 0 -6 -14 853.942 140.343 20
 0 6 -14 955.531 149.864 17
 0 6 -14 915.338 140.538 71
 0 6 -14 627.881 114.756 10
 0 6 -14 616.624 124.314 5
 0 -6 -14 886.061 141.16 7
 0 -6 14 1003.96 156.452 56
 0 -6 -14 829.968 119.372 59
 0 6 14 875.478 117.521 64
 0 6 -14 870.495 126.977 36
 0 -6 -15 3829.52 295.984 66
 0 6 15 3738.9 300.892 15
 0 -6 15 4445.83 288.087 48
 0 -6 -15 3534.53 284.961 20
 0 -6 15 3647.05 286.554 23
 0 6 15 3812.73 255.834 64
 0 -6 -15 4016.64 300.369 67
 0 6 15 3758.29 303.474 27
 0 6 -15 4098.15 311.407 17
 0 -6 15 4210.65 284.591 28
 0 6 -15 3927.35 293.563 15
 0 6 -15 3990.41 279.92 36
 0 6 15 3807.29 287.302 35
 0 6 15 3711.31 318.244 32
 0 6 -15 3671.69 273.374 10
 0 -6 15 4065.83 308.899 70
 0 -6 -15 4038.08 274.991 59
 0 6 15 3671.67 304.55 41
 0 6 -15 3684.29 290.866 12
 0 6 -15 4367.33 303.299 61
 0 -6 15 4139.17 289.189 63
 0 -6 15 4383.36 305.686 56
 0 6 -15 3577.97 287.341 5
 0 -6 -15 3970.03 293.775 1
 0 6 -15 4189.4 308.285 62
 0 6 -15 3699.92 297.562 71
 0 6 15 3940.35 285.847 53
 0 6 -16 36003.5 1692.41 17
 0 -6 16 36278.2 1670.45 24
 0 6 16 30787.7 1657.36 15
 0 6 -16 34842.6 1677.16 61
 0 6 16 33099.6 1649.3 35
 0 -6 16 37865.4 1648.11 48
 0 6 16 35000.9 1663.05 27
 0 -6 -16 36395.1 1667.58 39
 0 6 16 33862.1 1607.59 64
 0 -6 16 33208 1630.72 28
 0 6 16 35574.6 1675.2 41
 0 6 -16 34704.9 1664.41 15
 0 -6 16 32276.1 1640.86 23
 0 6 -16 36908.1 1692.01 62
 0 6 16 36722.2 1654.93 70
 0 -6 -16 35489.9 1664.61 20
 0 -6 -16 37245 1681.15 66
 0 -6 16 36475.9 1669.28 56
 0 6 16 34252.7 1637.23 53
 0 -6 16 35723.6 1654.38 63
 0 -6 -16 32953.2 1669.23 67
 0 6 -16 33760.9 1639.07 36
 0 -6 16 34900.9 1677.9 70
 0 6 -16 35720.7 1682.15 71
 0 6 16 35704.1 1691.85 32
 0 6 17 1728.5 174.692 64
 0 6 -17 1817.24 210.154 71
 0 -6 -17 2298.18 227.361 67
 0 -6 17 2176.73 204.785 48
 0 6 -17 1970.97 223 62
 0 6 -17 1956.53 210.664 15
 0 -6 -17 2286.14 234.521 61
 0 -6 -17 2332.57 219.59 39
 0 6 17 1944.78 165.143 22
 0 -6 17 2058.88 227.149 24
 0 -6 17 1866.63 203.595 28
 0 -6 17 1662.28 208.076 23
 0 -6 17 2088.25 211.643 63
 0 6 17 1929 219.467 15
 0 6 17 2307.33 234.042 41
 0 6 17 2334.49 257.955 32
 0 -6 -17 2059.14 219.536 38
 0 6 17 2284.49 217.829 70
 0 6 -17 1814.07 183.993 36
 0 6 17 1747.64 227.535 27
 0 -6 17 2016.39 226.725 56
 0 -6 17 2296.98 241.422 70
 0 6 -17 2213.41 238.557 17
 0 6 -17 1895.33 213.951 61
 0 -6 -17 2020.2 213.933 66
 0 -6 -17 1740.2 206.291 20
 0 -6 -18 4957.35 372.533 67
 0 -6 18 5407.9 350.24 48
 0 -6 18 5366.74 358.652 63
 0 -6 -18 5191.12 370.813 38
 0 6 18 5929.59 384.716 41
 0 6 18 5007.51 377.354 27
 0 6 18 4750.55 317.597 64
 0 6 -18 4923.94 358.119 15
 0 -6 -18 5134.21 365.83 39
 0 -6 18 4989.64 383.008 70
 0 -6 18 4883 371.205 56
 0 -6 18 5513.52 376.525 24
 0 6 -18 5164.11 381.031 17
 0 6 18 5305.73 399.913 32
 0 6 18 5419.42 359.345 70
 0 -6 -18 4729.62 367.167 66
 0 6 -18 5027.79 380.419 62
 0 6 -18 5177.21 341.847 36
 0 6 -18 4908.41 369.7 61
 0 -6 -18 4813.08 378.965 61
 0 -6 -18 5283.72 378.901 55
 0 6 18 4786.22 301.006 22
 0 6 -18 5208.77 378.18 71
 0 -6 18 4781.38 339.937 28
 0 -6 19 1138.14 204.344 70
 0 -6 -19 987.884 173.717 38
 0 6 19 896.269 207.012 32
 0 -6 -19 1028.7 171.071 39
 0 -6 -19 1044.57 169.241 66
 0 6 19 933.219 129.014 22
 0 6 -19 905.438 168.011 61
 0 6 -19 996.737 188.561 17
 0 -6 -19 1267.97 191.824 61
 0 -6 19 967.775 170.398 63
 0 -6 19 1228.99 204.063 24
 0 6 -19 773.786 164.107 71
 0 -6 19 1036.49 160.335 48
 0 -6 -19 994.726 174.709 55
 0 6 -19 860.71 163.01 15
 0 6 19 1070.52 176.436 41
 0 6 -19 1209.23 201.22 62
 0 6 19 1169.38 172.117 70
 0 -6 19 890.176 171.489 28
 0 6 -19 986.803 142.7 36
 0 6 20 25273.2 1210.34 70
 0 6 20 23596.4 1209.13 41
 0 -6 -20 24446.5 1211.6 65
 0 -6 20 23352.4 1199.62 63
 0 -6 20 22609.8 1182.72 28
 0 6 -20 23624.9 1246.96 61
 0 6 20 26121.1 1262.05 32
 0 -6 -20 25881.3 1245.72 66
 0 -6 20 24898.5 1197.24 48
 0 6 -20 24443 1250.84 17
 0 -6 -20 26278.1 1258.41 55
 0 6 -20 22677.4 1180.11 36
 0 6 -20 24852.5 1259.45 62
 0 -6 -20 25214.4 1267.08 61
 0 6 20 21434.3 1139.88 22
 0 -6 -20 24635.3 1236.09 39
 0 -6 20 26108.1 1245.68 24
 0 6 -20 24434.3 1225.35 15
 0 6 -20 24806.4 1244.43 71
 0 -6 20 26333.4 1269.41 70
 0 -6 -21 2915.53 295.923 55
 0 -6 -21 3245.21 289.73 66
 0 -6 21 2593.58 290.917 24
 0 -6 -21 2925.04 261.275 65
 0 6 -21 2933.15 303.883 17
 0 -6 21 3029.57 315.27 70
 0 6 -21 3323.63 284.493 15
 0 -6 -21 3419.52 322.592 61
 0 6 -21 2692.9 279.232 71
 0 6 21 2741.04 299.244 32
 0 6 21 2891.28 261.554 70
 0 -6 21 3217.71 258.297 48
 0 -6 21 3164.57 274.008 63
 0 6 -21 2791.22 235.56 36
 0 6 -21 2958.7 294.223 61
 0 6 21 2531.19 216.723 22
 0 6 -21 2893.54 299.373 62
 0 -6 -21 2695.4 279.065 39
 0 6 22 15077.5 818.811 70
 0 -6 22 16355.6 863.824 24
 0 6 -22 15121.7 871.753 62
 0 6 -22 14175.6 843.564 71
 0 -6 -22 15282.3 865.4 55
 0 6 22 16015.3 864.699 32
 0 -6 -22 14700.6 826.992 65
 0 -6 -22 15844.9 851.712 66
 0 -6 22 15709.7 809.939 48
 0 6 -22 14754.3 826.593 15
 0 -6 -22 15404.6 882.39 61
 0 -6 22 15242.9 874.118 70
 0 -6 -22 15112.1 854.044 39
 0 6 -22 15533.9 873.512 61
 0 -6 22 14718.1 817.035 63
 0 -6 23 1219.31 199.622 63
 0 -6 23 1571.52 241.541 24
 0 6 23 1540.01 202.108 70
 0 -6 23 1596.66 259.14 70
 0 -6 -23 1343.27 189.361 65
 0 6 -23 1371.91 192.201 15
 0 -6 -23 2067.93 254.175 55
 0 -6 -23 1622.88 212.198 66
 0 -6 -23 1505.54 214.393 39
 0 -6 23 1486.35 185.804 48
 0 -6 -23 1284.17 235.511 61
 0 6 -23 1700.48 223.37 71
 0 6 -23 1185.77 224.276 62
 0 6 -23 1152.03 202.458 61
 0 6 23 1385.37 230.253 73
 0 6 23 1745.97 233.424 32
 0 6 -24 1383.49 193.317 15
 0 -6 24 1841.33 259.772 24
 0 6 -24 1673.38 247.193 62
 0 -6 -24 1564.64 218.667 19
 0 -6 -24 1476.3 238.851 61
 0 -6 -24 1340.89 226.293 55
 0 -6 -24 1777.94 219.678 66
 0 6 24 1187.65 211.666 32
 0 6 24 1497.8 204.153 70
 0 -6 -24 1701.71 237.742 39
 0 6 -24 1548.62 218.617 61
 0 -6 24 1471.84 200.661 63
 0 6 24 1941.08 261.251 73
 0 6 -24 1294.03 196.805 71
 0 -6 24 1876.68 201.525 48
 0 -6 -24 1423.92 192.015 65
 0 -6 24 1501.32 264.756 56
 0 -6 24 1530.81 258.129 70
 0 6 -25 3445.99 318.057 71
 0 6 25 3880.95 306.561 70
 0 6 -25 3385.12 292.145 15
 0 -6 -25 3445.99 324.519 19
 0 -6 25 3663.32 362.229 56
 0 -6 -25 3634.37 359.168 61
 0 -6 -25 3431.25 334.617 39
 0 6 -25 3636.44 356.508 62
 0 -6 25 3777.35 288.336 48
 0 -6 -25 3427.28 329.4 18
 0 6 25 3567.44 325.213 32
 0 -6 -25 3701.89 316.046 66
 0 -6 -25 3369.67 300.049 65
 0 -6 -25 3688.58 349.95 55
 0 -6 25 4371.95 364.948 24
 0 6 -25 3593.78 332.301 61
 0 6 25 3862.74 346.037 73
 0 -6 25 3744.26 370.741 70
 0 6 26 1585.5 225.856 32
 0 -6 26 1565.8 272.931 56
 0 -6 -26 1690.4 257.821 61
 0 6 26 1461.09 235.007 73
 0 -6 -26 1655.96 235.515 18
 0 6 -26 1428.42 217.044 61
 0 -6 -26 1566.14 241.179 55
 0 6 -26 1533.5 196.483 15
 0 -6 26 1977.39 265.887 24
 0 6 -26 1673.4 213.075 71
 0 6 26 1982.76 220.91 70
 0 -6 -26 1900.13 215.038 65
 0 -6 26 1479.86 272.668 70
 0 6 -26 1611 250.264 62
 0 -6 26 1826.14 189.078 48
 0 -6 -26 1894.17 227.359 19
 0 -6 -26 1700.44 206.111 66
 0 -6 27 1070.59 223.873 24
 0 -6 -27 906.803 177.149 19
 0 -6 27 923.289 236.285 70
 0 -6 -27 957.673 193.146 18
 0 6 -27 915.354 181.729 61
 0 -6 -27 945.807 220.865 61
 0 -6 27 980.512 244.649 56
 0 -6 -27 1002.9 171.763 65
 0 6 27 931.406 168.055 70
 0 6 27 933.728 182.533 32
 0 6 27 915.319 191.834 73
 0 6 -27 1078.35 208.597 62
 0 -6 -27 995.208 158.657 66
 0 -6 28 48.8377 189.837 56
 0 -6 -28 282.869 141.691 18
 0 6 28 20.0496 117.432 32
 0 6 28 -18.5046 120.517 70
 0 -6 -28 131.247 95.9896 66
 0 -6 28 244.597 179.998 24
 0 6 -28 182.223 158.838 62
 0 -6 28 26.1982 192.823 70
 0 6 -28 95.1446 114.67 61
 0 -6 -28 101.699 115.659 19
 0 -6 -28 216.065 181.101 61
 0 6 28 79.8604 137.159 73
 0 -6 -28 111.492 104.49 65
 0 6 29 -84.5943 132.143 73
 0 6 29 105.262 117.601 70
 0 -6 29 -113.104 179.19 70
 0 6 -29 -11.0823 105.06 61
 0 -6 -29 53.1399 107.156 19
 0 6 -29 49.5021 141.709 62
 0 6 29 -9.11184 102.565 32
 0 -6 -29 151.341 124.796 18
 0 -6 -29 12.9425 169.194 61
 0 -6 29 -46.8963 185.542 56
 0 -6 29 -44.7183 149.265 24
 0 6 -30 254.801 153.81 62
 0 -6 30 155.203 182.532 70
 0 -6 -30 205.269 108.088 19
 0 -6 -30 334.696 130.27 18
 0 6 30 209.899 121.483 73
 0 -6 30 311.19 162.65 24
 0 6 -30 404.346 122.04 61
 0 6 30 286.831 116.654 32
 0 6 30 259.886 118.064 70
 0 -6 30 278.007 176.385 56
 0 -6 -31 1534.8 190.502 18
 0 -6 31 1584.03 230.694 70
 0 6 31 1269.78 163.714 70
 0 6 -31 1529.41 177.076 61
 0 -6 -31 1444.35 174.545 19
 0 -6 31 1631.06 210.985 24
 0 -6 31 1782.3 231.556 56
 0 6 -31 1554.26 210.048 62
 0 6 31 1211.17 167.565 73
 0 -6 -32 60.2247 94.0704 18
 0 -6 32 107.257 117.284 24
 0 6 32 106.895 91.9907 70
 0 6 -32 100.707 85.757 61
 0 -6 32 30.364 137.409 70
 0 -6 32 194.006 147.116 56
 0 6 -32 67.1839 121.69 62
 0 -6 -33 736.943 119.398 18
 0 -6 33 793.805 135.411 24
 0 6 33 1057.23 176.317 50
 0 -6 33 864.669 172.054 70
 0 6 -33 819.912 147.966 62
 0 6 -33 640.828 103.184 61
 0 -6 33 893.494 166.417 56
 0 -6 -34 2259.87 183.431 18
 0 -6 34 2545.82 229.168 70
 0 6 -34 2253.92 202.969 62
 0 -6 34 2224.51 179.751 24
 0 6 34 2780.41 234.692 50
 0 6 35 -53.0407 87.7973 50
 0 6 35 63.8879 68.402 26
 0 6 -35 23.605 63.2745 62
 0 -6 35 88.377 86.0176 70
 0 -7 0 116.523 85.46 1
 0 -7 0 55.3845 55.2325 6
 0 7 0 -20.0034 67.8799 6
 0 7 0 12.189 79.3413 7
 0 -7 0 55.8373 84.2059 5
 0 7 0 17.0154 69.5439 5
 0 -7 -1 16803.4 867.628 5
 0 7 1 17324.9 865.93 7
 0 7 -1 17866 862.405 5
 0 7 -1 16928.5 864.775 7
 0 -7 1 17769.2 864.647 1
 0 7 1 16068.8 844.787 6
 0 7 -1 17767.6 853.49 12
 0 -7 1 19343.6 843.095 6
 0 -7 -1 16865.7 858.333 1
 0 -7 -1 19300.5 844.806 6
 0 -7 1 16612.6 863.97 5
 0 7 -2 14523.2 720.472 7
 0 -7 2 13927.7 683.818 6
 0 7 2 13700.3 712.72 7
 0 7 -2 13667.7 698.736 12
 0 7 -2 14450.2 711.739 5
 0 -7 -2 13360.5 716.13 5
 0 -7 -2 15434.3 693.77 6
 0 -7 2 16100.2 727.018 1
 0 -7 2 13454.5 712.504 5
 0 7 2 13099.1 661.491 10
 0 7 2 14164.6 702.58 6
 0 -7 3 742.376 96.6881 6
 0 7 3 814.133 88.4627 10
 0 7 -3 650.248 117.311 7
 0 -7 -3 828.767 125.235 5
 0 7 -3 840.924 121.838 15
 0 7 -3 766.785 97.9934 4
 0 7 -3 780.076 112.525 5
 0 -7 3 834.269 123.835 11
 0 7 3 605.845 114.701 7
 0 7 3 879.813 122.101 47
 0 -7 3 740.968 104.419 43
 0 -7 3 903.863 127.15 1
 0 7 3 709.692 106.602 6
 0 7 4 11650.5 620.05 44
 0 7 -4 12745.8 629.075 4
 0 7 4 12823.7 648.831 32
 0 -7 -4 13183.7 641.809 49
 0 7 4 13146.3 657.152 6
 0 7 4 13650.3 616.876 10
 0 7 -4 13573.4 663.906 15
 0 -7 4 12422.3 638.704 45
 0 -7 4 12506.1 639.464 48
 0 7 -4 13343 659.98 5
 0 -7 4 11486 639.111 52
 0 -7 -4 12534.4 644.302 58
 0 -7 4 13363.5 634.845 6
 0 -7 4 12488.9 665.95 11
 0 -7 -4 12940.3 669.333 5
 0 7 -4 12762.9 649.264 36
 0 7 4 13289.4 657.255 15
 0 -7 4 13569.9 670.436 1
 0 -7 -5 189.504 79.5952 58
 0 -7 5 263.268 89.2929 45
 0 -7 5 137.775 78.1824 63
 0 7 -5 200.255 90.778 5
 0 -7 -5 183.708 87.6778 5
 0 -7 5 268.521 90.6461 52
 0 -7 5 191.859 71.5725 6
 0 7 5 203.109 65.0382 10
 0 -7 -5 185.6 71.481 31
 0 -7 -5 118.623 73.0689 68
 0 7 -5 163.883 90.7987 15
 0 7 5 73.0704 76.0547 6
 0 7 -5 140.622 81.6556 12
 0 7 -5 121.428 75.8193 36
 0 -7 5 208.972 81.7708 48
 0 7 5 77.348 87.4554 32
 0 -7 -5 200.998 76.2784 9
 0 -7 -5 92.4656 63.3943 4
 0 7 5 353.211 98.2624 30
 0 7 5 140.832 73.0167 44
 0 -7 5 48.3489 82.8621 11
 0 7 -5 76.1285 61.6503 4
 0 -7 5 158.065 88.9312 1
 0 7 5 150.714 85.0095 15
 0 -7 -5 245.145 83.6221 43
 0 -7 -5 163.605 75.4822 49
 0 7 6 55223.1 2407.51 32
 0 -7 6 46902.9 2370.46 28
 0 7 6 56116.3 2367.69 10
 0 -7 6 55348.5 2384.39 6
 0 -7 -6 54129.1 2383.73 4
 0 7 6 54263.6 2387.31 30
 0 -7 -6 55973.2 2420.26 66
 0 -7 6 50863.1 2388.26 63
 0 7 6 54425.7 2384.14 27
 0 7 -6 52413.5 2382.66 4
 0 -7 -6 54213 2430.98 3
 0 7 6 53449.6 2404.9 15
 0 -7 6 52522.8 2390.71 48
 0 -7 6 51932.4 2395.39 24
 0 7 6 45284.6 2368.17 44
 0 7 -6 56979.8 2416.69 15
 0 7 -6 54704 2412.81 5
 0 7 6 54036.8 2413.76 6
 0 -7 6 53271.9 2398.06 52
 0 7 -6 53543.1 2405.61 12
 0 -7 -6 49593.9 2382.27 43
 0 7 6 52443.1 2410.16 2
 0 -7 6 54362 2428.62 11
 0 -7 6 52278.2 2391.04 45
 0 -7 -6 53187.9 2391.28 49
 0 -7 -6 55807.7 2394.94 9
 0 -7 -6 52233.1 2421.1 5
 0 -7 -6 50879.2 2392 58
 0 7 -6 55298.3 2405.24 36
 0 -7 7 18798.2 998.462 28
 0 -7 7 20151.6 1015.83 63
 0 7 -7 22180.1 1040.65 15
 0 7 7 20677.9 1003.33 25
 0 7 7 19876.1 1000.69 72
 0 7 7 22348.2 998.356 10
 0 7 -7 21468.7 1035.43 5
 0 -7 7 19945.6 1012.65 56
 0 -7 7 21453 1032.96 70
 0 -7 7 23074.7 1014.62 6
 0 -7 7 21967.5 1027.52 24
 0 7 7 21900.1 1034.88 15
 0 -7 -7 21361.8 1021.14 49
 0 7 7 21389 1016.3 30
 0 -7 -7 21767.6 1042.13 66
 0 7 7 20865.8 1036.86 2
 0 7 7 22535.5 1036.98 47
 0 -7 -7 20950.1 1046.76 5
 0 -7 7 21720.9 1051.59 8
 0 7 -7 22858.4 1039.46 12
 0 7 -7 21374.6 1030.18 36
 0 7 7 20770.4 1011.7 27
 0 7 -7 21214.7 1017.42 47
 0 7 7 21273.6 1042.93 6
 0 -7 7 22022.1 1057.19 11
 0 -7 -7 21113 1010.74 4
 0 -7 -7 22764.4 1024.3 9
 0 -7 8 82624.1 3805.72 63
 0 7 -8 87122.8 3818.33 62
 0 -7 -8 86929.3 3811.6 31
 0 7 8 88805.5 3821.45 14
 0 7 8 76516.6 3775.86 53
 0 -7 -8 85905.6 3807.23 49
 0 7 8 81071.9 3791.26 72
 0 7 8 80447.3 3797.98 27
 0 -7 -8 89527.3 3814.68 9
 0 -7 8 85849 3842.89 11
 0 7 -8 85278 3823.16 5
 0 7 8 84259.2 3783.86 10
 0 -7 8 92826.4 3803.04 6
 0 7 -8 84647.4 3804.98 47
 0 -7 -8 85191.8 3838.71 5
 0 -7 8 86211.3 3814.63 24
 0 7 8 79616.9 3788.51 25
 0 -7 -8 90015.1 3841.52 7
 0 7 8 90820.8 3827.21 47
 0 7 -8 90097.1 3830.19 15
 0 -7 8 91152.6 3850.5 8
 0 7 -8 86696.4 3821.08 61
 0 7 8 90371.6 3841.86 6
 0 -7 -8 86912.2 3815.93 68
 0 -7 8 86547.5 3822.52 70
 0 7 -8 89919.2 3822.3 36
 0 7 -8 83788.7 3824.29 12
 0 -7 8 76563.8 3786.43 28
 0 -7 8 77514.4 3798.46 56
 0 -7 -8 92242.1 3838.05 66
 0 -7 -8 85488.9 3802.01 4
 0 -7 -8 92610.2 3845.72 1
 0 7 8 83331.6 3825.21 2
 0 7 8 84512.3 3819.41 15
 0 7 -9 1585.51 177.926 12
 0 -7 -9 2293.11 191.577 9
 0 -7 9 2047.65 194.818 28
 0 7 9 2102.32 179.587 72
 0 7 9 1760.44 175.455 14
 0 7 9 2994.4 230.593 25
 0 7 -9 2142.79 197.45 36
 0 7 -9 1758.97 183.444 5
 0 -7 -9 2796.94 203.214 49
 0 -7 -9 3075.88 206.778 20
 0 -7 9 1451.8 186.554 1
 0 -7 -9 3172.31 218.845 31
 0 7 -9 1329.71 172.502 62
 0 -7 9 1386.11 177.046 11
 0 7 9 1549.12 176.868 2
 0 -7 9 1742.58 201.222 70
 0 7 9 2131.82 197.703 15
 0 -7 9 2141.47 189.993 24
 0 -7 9 1355.68 181.885 8
 0 -7 9 1245.17 147.85 6
 0 -7 9 1859.4 184.374 56
 0 7 9 2715.99 221.841 47
 0 -7 -9 2535.22 201.075 68
 0 -7 -9 1809.73 172.84 4
 0 7 9 2964.29 205.07 53
 0 7 9 2824.81 226.221 27
 0 -7 9 2582.41 204.38 48
 0 -7 -9 1748.04 189.351 66
 0 7 9 2391.25 203.964 6
 0 -7 -9 1752.73 193.726 1
 0 7 -9 1301.2 169.2 61
 0 7 -9 2568.13 213.463 15
 0 -7 -9 1747.7 201.35 7
 0 -7 -9 1793.61 178.663 59
 0 7 9 2638.03 181.41 10
 0 -7 -9 2145.47 200.111 5
 0 7 10 16133.6 851.212 6
 0 7 10 15838.4 840.963 2
 0 7 -10 16812.6 847.399 71
 0 -7 10 15917.8 810.781 28
 0 -7 -10 16854.1 850.328 1
 0 -7 -10 16739.4 832.063 68
 0 -7 -10 16720.1 830.655 59
 0 -7 10 16675.1 857.655 8
 0 7 10 17024.2 842.444 47
 0 -7 10 17467.2 836.394 24
 0 -7 10 14785.4 844.691 1
 0 -7 -10 16353.4 824.492 31
 0 -7 10 16415.5 825.679 56
 0 7 -10 15869.3 833.67 5
 0 7 -10 18201.7 850.016 15
 0 7 10 16727 838.034 15
 0 -7 -10 16797.5 843.442 66
 0 -7 10 15457.2 847 11
 0 -7 -10 17024.1 830.477 9
 0 -7 10 17918.9 831.29 48
 0 7 10 15239.4 796.721 10
 0 -7 -10 16432.4 848.063 7
 0 7 10 16459.6 831.36 14
 0 7 10 14728.1 815.967 27
 0 7 -10 16434.1 831.027 61
 0 -7 -10 17995.5 833.412 20
 0 7 -10 15804.6 834.258 12
 0 7 -10 17358.9 835.877 36
 0 -7 10 15721 833.167 70
 0 7 -10 16063.9 829.461 62
 0 7 10 17209.9 807.794 53
 0 7 10 18387 857.678 32
 0 -7 -10 16468.7 818.935 4
 0 -7 10 16069.1 805.036 6
 0 -7 11 65034.9 3105.81 1
 0 -7 -11 69574.2 3100.05 1
 0 7 11 61206.4 3060.22 27
 0 7 -11 68732.9 3097.85 71
 0 -7 -11 66032.9 3075.25 9
 0 7 -11 73894.9 3084.08 36
 0 7 -11 64860.7 3080.75 5
 0 7 11 69838.6 3094.07 47
 0 7 -11 72664.1 3055.4 10
 0 7 -11 66428.7 3082.06 62
 0 -7 11 64092.1 3048.48 6
 0 7 11 68620.7 3109.41 6
 0 -7 -11 64743.4 3102.66 3
 0 7 11 73449.5 3106.17 32
 0 -7 -11 71510.1 3077.76 38
 0 7 11 67001.2 3084.9 15
 0 -7 -11 68011.6 3102.2 7
 0 7 11 63886 3091.36 2
 0 -7 11 71743.4 3086.21 24
 0 7 11 66925.3 3048.06 10
 0 -7 11 68987.2 3106.86 8
 0 -7 -11 66691.1 3090.74 66
 0 -7 -11 68024.3 3076.95 68
 0 -7 11 71174.6 3075.92 48
 0 -7 11 66290.8 3072.06 56
 0 7 11 69882.6 3050.54 53
 0 7 -11 65820.8 3082.77 12
 0 7 -11 67689.6 3080.62 61
 0 7 11 68349.8 3080.98 14
 0 -7 11 67118.8 3085.12 70
 0 -7 -11 68789.3 3087.34 67
 0 -7 -11 69124.3 3074.5 31
 0 7 -11 69025.3 3088.34 15
 0 -7 -11 68662.5 3075.05 59
 0 -7 -11 66753.5 3073.18 20
 0 -7 -12 2519.1 221.586 68
 0 7 12 2278.58 223.333 2
 0 7 -12 2974.71 247.931 15
 0 -7 -12 2339.95 206.464 59
 0 7 -12 2318.45 211.096 61
 0 7 -12 2609.02 201.76 10
 0 7 12 2656.9 218.44 53
 0 7 12 2816.89 230.916 35
 0 -7 -12 2288.16 216.008 31
 0 7 12 2755.07 202.975 10
 0 -7 12 2535.77 233.329 70
 0 -7 -12 2382.99 223.33 1
 0 7 12 2590.18 236.896 15
 0 -7 12 3066.84 245.883 24
 0 7 -12 2394.93 217.719 5
 0 -7 12 2372.64 228.527 8
 0 -7 12 2647.14 227.586 63
 0 -7 12 2745.93 228.609 56
 0 7 12 3052.46 262.463 32
 0 7 -12 2560.02 217.407 36
 0 7 -12 2289.78 216.47 12
 0 -7 12 2726.93 227.958 48
 0 -7 -12 2706.41 232.462 66
 0 -7 -12 2735.64 222.938 38
 0 7 12 2570.51 239.728 27
 0 7 -12 2612.75 233.906 71
 0 7 -12 2595.41 223.145 62
 0 -7 -12 2226.95 223.255 7
 0 -7 -12 2621.94 226.714 67
 0 7 -13 999.478 151.793 71
 0 7 -13 1256.84 155.301 36
 0 -7 -13 861.598 131.041 59
 0 7 13 884.245 115.404 64
 0 7 13 1048.29 169.599 15
 0 -7 13 1124.97 156.976 48
 0 -7 -13 895.801 144.264 38
 0 -7 13 925.121 160.523 70
 0 -7 -13 915.737 142.45 31
 0 7 -13 684.61 125.194 5
 0 -7 -13 714.584 136.805 66
 0 7 -13 919.118 125.749 10
 0 7 13 830.622 167.585 27
 0 7 13 1117.5 193.024 32
 0 7 -13 941.076 149.844 15
 0 7 13 894.062 122.302 10
 0 -7 -13 802.984 134.125 1
 0 7 13 939.208 144.371 35
 0 -7 13 982.885 156.591 56
 0 7 13 1069.51 158.191 53
 0 7 -13 876.633 139.425 62
 0 7 -13 878.985 132.572 61
 0 -7 13 910.838 162.365 24
 0 -7 13 1020.18 158.308 63
 0 -7 13 748.3 142.418 8
 0 -7 14 5542.18 378.921 70
 0 7 -14 5677.44 377.266 15
 0 -7 -14 5896.64 375.093 38
 0 -7 -14 5756.16 382.114 66
 0 7 -14 5803.48 376.658 61
 0 -7 -14 5617.2 376.682 1
 0 -7 14 5448.73 374.76 56
 0 7 -14 5690.08 361.223 36
 0 7 14 5789.16 373.655 35
 0 7 -14 6008.87 386.641 71
 0 -7 14 5717.29 382.615 24
 0 -7 14 5161.19 359.462 63
 0 -7 14 5113.72 350.028 28
 0 7 -14 4688.59 336.313 10
 0 7 14 5601.69 320.438 64
 0 -7 14 5521.92 361.797 48
 0 -7 -14 5411.32 352.46 59
 0 7 14 4840.64 389.94 32
 0 7 14 5930.65 390.181 15
 0 7 -14 5214.03 367.486 62
 0 7 14 5715.62 355.932 53
 0 -7 15 23307.5 1178.32 70
 0 7 15 22577.6 1099.64 64
 0 7 -15 22649.4 1146.05 36
 0 7 15 18965.4 1168.14 32
 0 7 -15 25180.6 1179.73 15
 0 7 15 23392.1 1176.97 15
 0 -7 -15 24044.5 1177.85 66
 0 -7 15 24360.2 1173.23 56
 0 -7 15 23644.2 1160.04 63
 0 -7 -15 24155 1150.13 59
 0 7 -15 24015.9 1175.2 61
 0 -7 15 22931.9 1139.28 28
 0 7 15 24198.9 1138.84 53
 0 7 15 23846.8 1164.88 35
 0 -7 15 26444.8 1164.89 48
 0 7 15 19572.8 1158.53 41
 0 -7 -15 23413.2 1163.21 20
 0 7 -15 24747.8 1182.7 62
 0 7 -15 24872.9 1192.03 71
 0 -7 -15 22357.9 1162.58 38
 0 -7 -16 10777.9 614.556 59
 0 -7 16 10116.8 613.667 28
 0 -7 16 11577.7 638.832 63
 0 7 16 10563.4 645.121 15
 0 7 16 10486.5 651.506 41
 0 7 -16 12042.1 659.714 61
 0 -7 16 11866.5 652.711 56
 0 7 -16 12109.6 662.208 62
 0 7 16 10834.9 578.499 64
 0 7 -16 11019.7 643.461 15
 0 -7 -16 12418 667.156 66
 0 7 16 11377.4 620.225 53
 0 7 -16 11682.8 660.55 71
 0 -7 16 12343.1 638.544 48
 0 -7 -16 11671.6 646.135 20
 0 7 16 11309.6 675.5 32
 0 7 16 11078.7 631.439 35
 0 7 -16 11147.1 623.397 36
 0 -7 16 11364.4 657.345 70
 0 -7 -17 2966.03 267.772 20
 0 7 17 2462.83 207.855 64
 0 7 17 2206.86 247.686 15
 0 7 -17 2826.79 271.083 62
 0 -7 17 2906.57 263.411 63
 0 7 17 2680.95 279.306 41
 0 7 -17 2990.81 267.657 61
 0 -7 17 3033.39 255.931 48
 0 7 17 2586.43 243.495 35
 0 7 -17 2523.42 252.815 15
 0 7 -17 2780.42 269.049 71
 0 -7 -17 3039.5 286.033 61
 0 -7 -17 2830.94 262.616 66
 0 7 -17 2916.41 244.417 36
 0 -7 -17 2102.47 249.802 67
 0 -7 17 2417.8 246.595 28
 0 -7 17 2445.02 271.539 70
 0 7 17 2845.31 247.681 70
 0 7 17 3275.67 319.353 32
 0 -7 -17 2903.55 262.05 39
 0 -7 17 3354.32 291.919 56
 0 -7 18 3189.81 271.187 28
 0 7 18 2656.33 273.878 15
 0 7 18 2951.77 283.478 41
 0 7 -18 2617.6 270.231 15
 0 -7 -18 2763.72 289.356 67
 0 7 18 2938.84 305.175 27
 0 7 18 3191.49 321.366 32
 0 -7 18 3202.19 267.106 48
 0 7 -18 2532.18 270.947 62
 0 -7 18 3050.08 296.059 56
 0 -7 18 3213.07 244.947 45
 0 7 18 2558.32 222.783 64
 0 7 -18 2985.06 280.756 71
 0 7 -18 3260.64 283.22 61
 0 -7 -18 3084 284.335 55
 0 7 -18 2795.14 248.27 36
 0 -7 18 2919.86 274.803 63
 0 7 18 3138.02 267.536 70
 0 -7 18 3309.44 313.175 70
 0 -7 -18 3355.33 294.676 66
 0 -7 -18 3220.43 297.468 61
 0 -7 -18 3123.48 276.477 39
 0 -7 -19 406.736 152.083 67
 0 -7 -19 668.828 154.679 39
 0 7 -19 645.931 154.296 71
 0 7 -19 693.712 149.475 61
 0 -7 -19 591.269 154.324 55
 0 -7 -19 809.793 182.281 61
 0 7 19 627.218 165.072 41
 0 7 -19 645.755 164 15
 0 -7 19 677.849 127.152 45
 0 -7 19 575.791 184.614 56
 0 7 -19 540.709 125.785 36
 0 7 -19 733.967 161.859 62
 0 -7 19 881.736 191.115 70
 0 -7 19 828.842 201.112 24
 0 -7 19 883.663 163.492 48
 0 -7 19 581.955 160.925 63
 0 7 19 753.856 151.688 70
 0 -7 -19 867.419 173.253 66
 0 7 19 499.415 196.338 32
 0 -7 -20 9071.05 597.861 61
 0 7 -20 9603.32 589.952 71
 0 -7 20 8781.32 584.568 56
 0 -7 20 9175.28 515.188 45
 0 -7 20 8649.86 529.81 52
 0 -7 20 8843.91 554.641 63
 0 -7 -20 8220.2 571.122 38
 0 -7 -20 8735.05 569.424 39
 0 7 -20 8940.96 583.349 61
 0 7 -20 8794.54 562.873 15
 0 -7 20 9403.65 604.502 70
 0 -7 -20 8644.31 581.815 55
 0 7 -20 9521.38 538.327 36
 0 7 20 9061.33 541.396 70
 0 7 -20 9524.01 600.208 62
 0 7 20 9535.54 568.494 41
 0 -7 -20 9410.06 581.397 66
 0 -7 -20 9801.74 553.813 65
 0 7 20 9999.04 607.257 32
 0 -7 20 9412.76 594.749 24
 0 -7 20 9324.56 545.586 48
 0 7 -21 417.788 154.572 15
 0 7 21 493.276 143.345 41
 0 7 21 485.081 143.534 70
 0 7 21 563.453 190.845 32
 0 7 -21 381.282 162.002 71
 0 -7 21 549.178 131.624 52
 0 -7 -21 611.742 167.81 66
 0 7 -21 700.337 158.658 61
 0 7 -21 384.094 164.351 62
 0 -7 21 609.591 207.634 24
 0 -7 -21 346.91 148.534 39
 0 -7 21 594.32 210.997 56
 0 -7 21 406.527 134.628 48
 0 7 -21 408.213 112.454 36
 0 -7 -21 423.859 125.335 65
 0 -7 21 417.562 193.696 70
 0 -7 -21 437.645 166.908 61
 0 -7 21 296.177 155.194 63
 0 -7 -21 338.301 151.087 55
 0 -7 22 3713.41 311.057 63
 0 -7 -22 3623.37 319.882 66
 0 7 22 3362 288.734 70
 0 7 -22 3407.37 267.866 36
 0 -7 22 3660.55 344.73 24
 0 7 -22 3221.15 302.006 15
 0 -7 22 3320.29 270.663 52
 0 -7 -22 3839.8 345.149 61
 0 7 -22 3506.4 336.635 62
 0 -7 -22 3404.08 291.562 65
 0 7 22 3456.04 334.438 32
 0 7 -22 3417.7 319.922 71
 0 7 -22 3449.32 320.671 61
 0 -7 -22 3726.05 336.991 55
 0 -7 22 3344.48 288.562 48
 0 -7 22 3534.36 348.894 70
 0 -7 -22 3294.71 312.835 39
 0 -7 -23 422.739 134.4 65
 0 -7 23 225.958 132.084 48
 0 7 23 359.127 134.897 70
 0 7 23 342.885 181.401 32
 0 7 -23 303.607 176.272 62
 0 7 -23 62.1629 118.74 71
 0 -7 -23 341.876 161.632 39
 0 -7 -23 381.26 161.807 55
 0 -7 23 424.334 121.845 52
 0 7 -23 481.921 153.106 61
 0 -7 23 492.408 199.311 24
 0 -7 -23 338.676 138.477 66
 0 7 -23 200.861 129.761 15
 0 -7 23 451.647 208.648 70
 0 -7 -23 514.263 189.166 61
 0 7 24 304.943 187.102 73
 0 -7 -24 114.118 107.061 65
 0 7 24 108.603 153.064 32
 0 7 24 101.547 114.468 70
 0 -7 -24 53.1242 147.016 55
 0 -7 -24 210.675 178.922 61
 0 7 -24 332.688 157.979 62
 0 -7 24 275.293 205.411 70
 0 -7 -24 71.4689 116.758 66
 0 -7 24 215.608 127.898 48
 0 7 -24 106.483 125.323 61
 0 7 -24 216.272 127.656 15
 0 -7 24 273.094 212.653 24
 0 -7 -24 111.205 139.244 39
 0 -7 25 548.534 139.616 48
 0 -7 -25 575.815 193.046 61
 0 -7 -25 769.299 183.22 55
 0 7 25 316.182 171.294 32
 0 -7 -25 420.185 170.305 39
 0 -7 -25 576.844 150.383 66
 0 -7 25 780.479 226.884 70
 0 -7 25 334.703 190.255 24
 0 -7 -25 614.252 163.586 19
 0 -7 -25 690.042 147.477 65
 0 7 -25 715.037 196.31 62
 0 7 -25 651.796 161.056 61
 0 7 25 595.59 142.982 70
 0 7 25 585.759 195.184 73
 0 7 -25 670.395 151.155 15
 0 -7 -26 1660.82 237.978 55
 0 -7 -26 1630.02 193.647 65
 0 -7 26 1612.12 193.499 48
 0 7 -26 1521.58 242.23 62
 0 7 -26 1556.2 217.824 61
 0 -7 -26 1703.87 226.829 18
 0 7 26 1905.48 252.258 73
 0 7 26 1158.07 212.63 32
 0 -7 26 1815.5 266.13 24
 0 7 -26 1628.14 194.653 15
 0 7 26 1743.07 198.682 70
 0 -7 -26 1772.28 258.529 61
 0 -7 -26 1706.46 217.011 19
 0 -7 -26 1456.95 203.477 66
 0 -7 26 1723.3 269.837 70
 0 -7 -27 12175.2 735.625 18
 0 7 27 12149.9 714.959 32
 0 -7 -27 12967 725.758 19
 0 -7 27 12662.3 747.152 24
 0 -7 27 13598.5 777.221 70
 0 7 27 11843.5 682.133 70
 0 7 27 13361.3 753.23 73
 0 -7 -27 12391.1 706.878 66
 0 7 -27 12558.9 731.172 61
 0 -7 -27 12894.7 705.224 65
 0 -7 -27 13393.4 772.041 61
 0 7 -27 12934.5 755.805 62
 0 -7 -27 12496.6 751.551 55
 0 -7 27 11987.5 673.5 48
 0 -7 -28 2606.18 236.201 65
 0 7 28 2010.62 235.592 32
 0 -7 -28 3095.27 279.504 18
 0 -7 -28 2500.59 235.285 66
 0 -7 -28 3335.2 313.647 61
 0 -7 28 2775.7 320.556 56
 0 7 28 2647.56 236.852 70
 0 7 -28 2873.9 298.336 62
 0 -7 28 2571.11 308.51 70
 0 -7 -28 2661.44 255.789 19
 0 7 -28 2710.77 261.476 61
 0 7 28 2751.97 276.793 73
 0 -7 28 2535.32 290.531 24
 0 7 29 1209.88 157.679 70
 0 -7 -29 1450.97 193.395 18
 0 7 -29 1358.61 203.521 62
 0 -7 29 1352.71 231.893 70
 0 7 29 900.202 158.666 32
 0 -7 -29 1387.57 220.102 61
 0 -7 -29 875.413 159.11 19
 0 -7 29 1196.19 233.778 56
 0 -7 29 1310.97 221.592 24
 0 7 -29 1280.88 176.512 61
 0 7 29 1233.74 197.75 73
 0 7 30 1127.89 158.642 32
 0 7 -30 1382.31 170.878 61
 0 -7 30 1547.08 241.015 70
 0 -7 -30 1280.92 178.415 18
 0 -7 30 1436.61 212.458 24
 0 7 -30 1456.32 206.26 62
 0 7 30 1576.54 166.563 70
 0 -7 30 1213.89 218.724 56
 0 -7 -30 1226.5 161.404 19
 0 7 30 1439.19 187.811 73
 0 -7 -30 1541.52 217.965 61
 0 7 -31 136.55 80.98 61
 0 -7 -31 112.466 91.703 18
 0 -7 31 145.572 139.792 24
 0 -7 -31 52.0551 125.213 61
 0 -7 31 172.836 156.023 56
 0 7 -31 242.309 125.725 62
 0 7 31 128.364 105.019 73
 0 -7 -31 127.489 81.0865 19
 0 -7 31 -10.207 138.065 70
 0 -7 -32 1474.14 183.099 61
 0 -7 32 1280.53 188.516 56
 0 -7 32 1421.81 194.639 70
 0 7 -32 1390.88 176.446 62
 0 -7 32 1337.02 171.03 24
 0 -7 -32 1477.03 159.197 18
 0 7 32 1125.46 141.553 73
 0 7 -32 1005.16 123.594 61
 0 -7 33 55.559 116.821 70
 0 -7 -33 -5.97943 61.6176 18
 0 7 -33 88.7557 87.5252 62
 0 -7 -33 72.1703 92.871 61
 0 7 33 132.271 112.652 50
 0 -7 33 38.597 84.1198 24
 0 7 -34 228.841 59.4894 16
 0 -7 34 190.689 71.2415 24
 0 7 34 247.597 97.7965 50
 0 -7 34 165.695 99.6166 70
 0 7 -34 262.914 84.8023 62
 0 -7 -34 179.922 80.6088 61
 0 7 35 1435.63 137.373 50
 0 7 -35 1257.48 121.868 62
 0 -7 35 1350.84 136.008 70
 0 -7 -35 1592.69 136.103 61
 0 -8 0 32151.3 1513.28 52
 0 8 0 33243.9 1497.24 54
 0 -8 0 32737.7 1506.25 48
 0 -8 0 35232.4 1537.82 1
 0 8 0 32691.4 1524.28 75
 0 8 0 33354.8 1508.94 32
 0 -8 0 31572 1507.34 45
 0 -8 0 33348.6 1497.11 6
 0 8 0 33290.8 1514.49 47
 0 8 0 31896 1508.58 6
 0 8 0 28498.6 1470.96 44
 0 -8 0 31768.3 1500.47 49
 0 8 0 33810.1 1520.24 12
 0 -8 0 32416.9 1539.41 5
 0 8 0 33502 1529.7 16
 0 8 0 32619.8 1526.78 15
 0 8 0 32498.4 1534.32 7
 0 8 1 29512.3 1360.26 32
 0 -8 1 28641.1 1386.62 5
 0 8 -1 29235.3 1357.64 32
 0 -8 1 31067.4 1351.33 6
 0 -8 -1 28322.9 1357.68 45
 0 -8 -1 28492.7 1361.94 52
 0 8 1 29523.4 1365.36 47
 0 8 1 31439.9 1353.66 54
 0 -8 1 29348.4 1366.2 52
 0 8 -1 29843.3 1364.71 47
 0 -8 1 28424.9 1354.7 48
 0 -8 -1 31645 1355.1 6
 0 -8 1 27381.9 1375.47 1
 0 -8 1 28448 1359.01 45
 0 -8 -1 29052.4 1356.2 43
 0 -8 -1 27270.5 1348.82 48
 0 8 -1 29577 1377.41 75
 0 -8 -1 25631.3 1351.71 58
 0 -8 -1 30052 1356.63 49
 0 8 1 28760.4 1382.62 7
 0 8 1 30672.7 1378.77 75
 0 8 1 29997.2 1367.98 6
 0 8 1 30268 1381.18 15
 0 8 -1 28435.5 1342.96 54
 0 8 1 28903 1375.57 16
 0 8 1 28073.2 1317.51 10
 0 8 -1 30056.5 1380.01 5
 0 8 -1 29241 1379.65 16
 0 -8 -1 27843.6 1384.92 5
 0 -8 -1 32027.4 1389.39 1
 0 -8 1 29583.9 1353.39 49
 0 8 1 28511.5 1336.65 30
 0 8 -1 29955.7 1369.34 12
 0 8 -1 26915.7 1322.32 44
 0 8 -1 29194 1384.53 7
 0 8 1 26670.8 1326.04 44
 0 8 2 11533.4 622.557 75
 0 8 -2 11722.7 609.371 32
 0 8 -2 12391.4 623.945 12
 0 -8 2 12600 642.141 1
 0 8 2 11379.8 572.934 10
 0 -8 -2 11682.5 612.753 45
 0 8 2 12285.5 631.586 16
 0 8 -2 12353.5 632.567 5
 0 8 -2 11451.1 594.313 54
 0 -8 -2 11174.9 613.28 52
 0 8 2 12447.2 634.578 15
 0 8 2 11795.9 635.033 7
 0 8 -2 12021 616.325 47
 0 -8 -2 11612.9 617.153 58
 0 -8 -2 11976 609.819 43
 0 -8 2 12027.8 639.828 5
 0 8 -2 12370 637.058 16
 0 8 2 11380 616.362 6
 0 8 -2 11617.8 627.878 75
 0 8 -2 12335 641.717 7
 0 -8 2 12073.6 617.939 58
 0 8 2 12378.9 608.896 54
 0 -8 -2 12661.3 649.784 5
 0 8 2 12328.4 618.214 32
 0 8 2 10648.8 583.303 44
 0 -8 2 13185 606.034 6
 0 8 2 12721.4 625.983 47
 0 -8 -2 10660.7 599.087 48
 0 8 2 11787.5 594.507 30
 0 8 2 11903.8 626.008 69
 0 -8 2 12147.5 619.841 52
 0 -8 -2 11072.3 605.09 49
 0 -8 -2 13959 647.129 1
 0 -8 2 11555.9 609.196 48
 0 -8 2 11583.1 606.385 43
 0 8 -3 45310 2044.96 7
 0 8 -3 46250.6 2041.71 16
 0 -8 -3 42979.1 2017.73 58
 0 8 3 44149.4 1971.86 10
 0 -8 -3 44217.3 2013.38 45
 0 8 3 44690.7 2030.36 16
 0 -8 3 44729.3 2008.62 43
 0 -8 3 43620.7 2015.04 58
 0 8 3 44264.5 2017.8 32
 0 -8 3 45560.2 2042.89 1
 0 8 3 43459.7 2024.26 6
 0 -8 3 41482.5 2006.93 24
 0 8 3 45294.5 2024.51 47
 0 8 3 44319.2 2030.25 15
 0 -8 3 47813.5 2004.49 6
 0 -8 3 44315.6 2046.87 11
 0 8 3 45406.6 2029.51 75
 0 8 3 37588.8 1979.24 44
 0 -8 -3 42650.7 2008.03 43
 0 8 3 46205.5 1994.96 27
 0 8 -3 44856.3 2031.79 5
 0 -8 -3 43926.3 2048.34 5
 0 8 -3 42941.1 2007.12 32
 0 8 3 44561 2028.2 69
 0 8 -3 45355.1 2017.52 47
 0 8 -3 43571.5 1993.9 54
 0 8 3 43623.4 1995.54 30
 0 -8 3 42872 2011.39 48
 0 -8 4 10020.3 556.995 1
 0 -8 4 10300.6 517.21 6
 0 8 4 10231.6 518.506 27
 0 8 4 9913.42 493.027 10
 0 8 -4 10345.7 550.652 5
 0 -8 4 9840.18 531.651 24
 0 -8 4 9789.44 532.075 58
 0 8 -4 9987.2 513.484 54
 0 -8 4 10127.1 532.682 48
 0 8 -4 9316.24 507.12 4
 0 -8 -4 9932.44 531.423 68
 0 -8 4 9706.06 523.514 43
 0 8 -4 9689.93 524.336 32
 0 -8 4 10725.5 570.122 11
 0 8 4 8645.78 504.538 44
 0 -8 -4 9664.4 528.037 43
 0 -8 -4 10036.5 564.007 5
 0 8 -4 10416.6 535.583 47
 0 -8 -4 9951.76 539.172 58
 0 8 4 9851.89 542.421 6
 0 8 -4 10447.5 555.038 15
 0 8 -4 10005.8 558.08 7
 0 -8 4 9839.79 531.77 45
 0 8 4 10736.7 546.287 32
 0 8 4 10457.5 522.782 30
 0 -8 -4 10179.7 524.497 9
 0 -8 -4 10504.2 531.627 31
 0 8 4 9597.34 538.582 47
 0 8 4 9896.31 547.016 15
 0 8 4 10447.5 547.368 69
 0 8 -5 1252.99 150.918 7
 0 8 -5 832.979 137.322 15
 0 8 5 1008.02 138.075 2
 0 8 -5 911.265 126.926 12
 0 -8 -5 932.411 124.87 31
 0 -8 5 981.136 137.188 1
 0 -8 -5 759.164 121.678 58
 0 -8 5 926.081 128.46 45
 0 -8 5 913.839 131.219 24
 0 8 5 1106.4 104.84 10
 0 -8 -5 1098.91 131.517 68
 0 -8 5 816.104 127.227 48
 0 -8 -5 846.208 124.417 49
 0 -8 -5 863.399 136.268 5
 0 -8 5 949.666 140.456 11
 0 -8 5 1092.81 125.535 56
 0 8 -5 1207.7 115.97 54
 0 8 5 1041.53 133.236 27
 0 8 5 917.963 127.692 6
 0 8 -5 946.777 109.065 4
 0 -8 5 1000.6 127.14 43
 0 -8 -5 934.341 128.293 43
 0 -8 5 1014.53 109.315 6
 0 -8 5 790.461 130.408 52
 0 8 5 1042.19 132.448 69
 0 -8 5 830.319 124.087 70
 0 8 -5 970.911 130.383 5
 0 8 5 762.59 113.642 44
 0 8 5 973.742 123.008 25
 0 8 -5 1174.61 133.575 47
 0 -8 -5 1035.47 118.294 9
 0 8 5 1095.97 132.921 30
 0 8 5 861.126 102.455 72
 0 8 5 918.651 139.829 15
 0 8 -5 920.322 119.52 32
 0 8 5 1073.74 147.822 32
 0 -8 6 25.521 55.5265 6
 0 8 6 164.45 102.478 27
 0 8 6 272.904 109.895 30
 0 -8 6 90.1259 78.6316 43
 0 -8 6 109.378 91.4103 11
 0 -8 6 48.5995 85.4293 45
 0 8 -6 111.855 65.8238 54
 0 -8 6 89.7837 95.083 52
 0 8 -6 108.745 89.8071 5
 0 8 -6 88.9104 73.3534 32
 0 8 6 7.47751 77.6266 2
 0 8 6 30.0075 73.4974 6
 0 -8 6 24.4724 82.9163 1
 0 8 6 61.7033 90.0811 14
 0 8 6 114.622 72.2582 72
 0 8 -6 66.8356 85.4438 47
 0 -8 6 139.938 89.0415 70
 0 8 -6 -31.5278 56.7995 4
 0 -8 6 104.989 90.3345 48
 0 -8 -6 90.8925 92.4624 66
 0 8 -6 125.418 82.0723 12
 0 8 6 175.857 115.865 32
 0 8 6 132.834 101.891 15
 0 -8 -6 220.202 96.8662 49
 0 8 -6 181.77 107.421 15
 0 8 6 27.3217 63.128 10
 0 8 6 108.928 78.9072 69
 0 -8 -6 58.1702 82.0199 5
 0 8 6 181.677 99.7332 25
 0 -8 -6 42.8316 81.9476 3
 0 -8 6 6.35099 80.1894 24
 0 -8 6 105.116 82.4333 56
 0 8 -6 53.0551 79.3589 36
 0 8 6 122.243 87.0121 53
 0 8 -6 58.2169 61.4237 62
 0 -8 -6 117.228 73.6778 9
 0 -8 -6 144.867 84.8845 31
 0 8 7 310.289 95.8312 53
 0 8 7 321.51 101.407 14
 0 -8 -7 377.64 89.7561 9
 0 -8 -7 353.339 78.0051 4
 0 -8 7 243.451 96.3227 45
 0 8 -7 354.915 96.9012 5
 0 8 7 367.512 117.953 27
 0 -8 7 255.112 101.104 8
 0 -8 7 403.459 78.7015 6
 0 8 -7 455.396 97.8148 32
 0 8 7 399.207 86.1632 72
 0 -8 -7 318.379 102.532 66
 0 -8 7 316.382 115.45 52
 0 8 -7 382.084 89.5886 61
 0 -8 -7 208.936 97.9682 49
 0 -8 7 533.256 113.899 70
 0 -8 7 412.428 106.255 24
 0 8 -7 279.463 98.5994 36
 0 -8 7 362.39 92.4304 43
 0 8 7 287.214 117.166 15
 0 -8 7 340.305 102.78 63
 0 8 -7 322.448 87.8651 62
 0 -8 7 257.933 98.8158 56
 0 -8 -7 273.384 100.875 3
 0 8 7 316.863 110.688 25
 0 -8 7 340.16 104.928 48
 0 8 7 315.128 95.2744 6
 0 8 7 397.889 120.672 47
 0 8 -7 269.411 93.3892 12
 0 8 7 401.46 82.0514 10
 0 8 -7 365.253 117.109 15
 0 8 -7 358.115 80.5048 4
 0 8 7 456.137 129.984 32
 0 -8 -7 204.306 95.2305 5
 0 8 7 383.037 107.396 2
 0 -8 7 320.505 102.951 11
 0 8 -7 210.181 66.9492 54
 0 8 -7 290.263 89.2297 47
 0 8 -8 35302.5 1693.93 12
 0 8 -8 35120.8 1664.19 4
 0 -8 8 34772.1 1675.45 63
 0 8 8 34080.2 1693.18 2
 0 8 8 34489.6 1640.12 10
 0 8 -8 35437.5 1672.28 47
 0 8 -8 35906.8 1684.25 62
 0 8 8 32206.4 1651.2 25
 0 8 8 32686.9 1640.21 53
 0 -8 -8 37938.8 1668.05 4
 0 -8 -8 37562.9 1682.02 49
 0 8 -8 37421.8 1699.4 15
 0 -8 -8 36622.3 1722.16 3
 0 8 8 37028.9 1695.47 15
 0 -8 -8 38037.9 1683.4 20
 0 8 -8 35783.8 1693.04 5
 0 -8 -8 37470.1 1719.42 5
 0 -8 -8 38200.8 1708.95 66
 0 8 -8 36298.2 1687.94 61
 0 -8 -8 36539.8 1678.71 9
 0 -8 8 37264.5 1686.71 24
 0 -8 8 37756.6 1720.56 8
 0 -8 8 35153.3 1674.7 56
 0 8 -8 38514.6 1693.47 36
 0 8 8 36757.3 1690.51 14
 0 -8 -8 37715.5 1716.73 1
 0 -8 8 35866.4 1656.4 6
 0 8 8 35933 1705.91 6
 0 -8 8 36390.2 1690.98 70
 0 -8 8 38750.3 1674.15 43
 0 8 8 32599.2 1654.45 72
 0 -8 8 37000.1 1679.78 45
 0 8 8 33436.7 1662.83 27
 0 -8 8 36901.9 1720.93 11
 0 8 8 38419.9 1700.42 47
 0 -8 8 36298.5 1684.94 52
 0 -8 -9 5539.62 332.39 9
 0 8 -9 5184.08 332.951 61
 0 -8 9 4791.55 326.967 63
 0 -8 9 5066.95 338.432 70
 0 8 9 5451.36 349.939 2
 0 8 9 5059.43 343.607 15
 0 -8 9 5022.87 351.302 11
 0 -8 9 5347.67 332.332 45
 0 -8 -9 5291.64 349.719 66
 0 8 -9 5095.96 320.718 47
 0 8 9 4844.08 344.995 6
 0 -8 -9 4999.5 329.798 31
 0 -8 9 4582.5 299.32 6
 0 8 9 4477.89 323.38 27
 0 8 -9 4669.14 333.335 12
 0 8 9 4797.64 309.32 72
 0 -8 9 4955.72 334.15 52
 0 8 -9 4835.54 332.523 5
 0 -8 -9 4976.09 311.373 4
 0 8 -9 4725.41 323.485 62
 0 -8 -9 5126.51 333.133 20
 0 8 9 4521.72 293.19 10
 0 8 -9 5689.83 353.624 15
 0 -8 -9 4870.99 332.791 59
 0 -8 9 5086.68 337.118 24
 0 -8 9 5057.96 329.05 56
 0 -8 -9 4736.51 327.897 68
 0 8 9 4781.12 306.508 53
 0 -8 -9 5014.12 327.91 49
 0 8 -9 5403.58 339.696 36
 0 8 9 5732.13 354.914 47
 0 -8 -9 5728.61 361.749 1
 0 8 -9 5141.66 317.207 4
 0 8 9 5207.16 338.607 14
 0 -8 9 5346.82 359.244 8
 0 -8 10 1834.6 197.586 70
 0 -8 10 2571.41 212.267 52
 0 -8 -10 2066.43 207.54 1
 0 -8 10 1851.87 192.966 56
 0 8 -10 1807.39 204.162 15
 0 8 10 1902.25 191.314 14
 0 8 -10 2074.47 196.21 62
 0 8 10 1668.35 190.106 2
 0 -8 -10 1894.95 173.698 4
 0 -8 10 2165.79 213.643 24
 0 -8 10 1927.75 207.122 8
 0 8 -10 2039.48 184.172 47
 0 -8 10 2236.4 208.423 48
 0 -8 -10 2128.46 202.36 68
 0 8 10 2023.85 182.062 53
 0 -8 -10 2182.12 213.447 66
 0 8 10 2002.48 202.677 15
 0 -8 -10 2274.96 193.709 38
 0 8 -10 1734.57 183.735 5
 0 -8 -10 2250.15 203.619 31
 0 8 -10 2119.7 198.178 36
 0 -8 -10 2035.09 196.459 20
 0 -8 10 1406.11 183.868 11
 0 8 -10 1912.87 187.75 61
 0 -8 -10 2135.78 201.296 59
 0 -8 10 1929.51 191.99 45
 0 8 10 1742.27 206.441 27
 0 8 10 2269.57 224.306 47
 0 8 -11 100240 4662.21 5
 0 8 11 93716.6 4636.43 27
 0 8 11 105576 4671.76 15
 0 8 -11 105237 4671.19 15
 0 -8 -11 109975 4661.08 20
 0 -8 11 101515 4650.35 56
 0 -8 11 100324 4661.68 70
 0 8 -11 97343.3 4634.55 47
 0 8 11 112429 4690.49 32
 0 -8 11 106955 4656.49 48
 0 8 -11 106589 4660.91 36
 0 -8 -11 107847 4657.44 31
 0 8 -11 100182 4655.8 61
 0 -8 11 101353 4685.43 8
 0 -8 -11 103747 4656.12 38
 0 -8 -11 99013.5 4679.07 1
 0 -8 -11 106948 4680.73 66
 0 8 11 105893 4620.52 53
 0 -8 -11 104503 4659.34 59
 0 -8 11 106545 4656.07 52
 0 -8 -11 104988 4660.01 68
 0 -8 11 106751 4646.99 45
 0 8 -11 99358.8 4653.92 62
 0 -8 -11 106983 4671.23 67
 0 8 11 107251 4663.49 14
 0 -8 11 106808 4664.77 24
 0 8 11 102351 4671.62 47
 0 8 12 19829.8 983.603 53
 0 8 -12 19919.6 1015.28 36
 0 8 -12 20842.7 1033.29 15
 0 -8 -12 19391 1017.13 68
 0 -8 -12 19606.5 1013.03 31
 0 -8 -12 18794.2 1009.05 38
 0 -8 12 21759.2 993.252 43
 0 8 -12 19279.9 1014.53 62
 0 -8 12 18779.7 1009.34 56
 0 -8 -12 19835.5 1011.46 59
 0 -8 12 21112.3 1008.59 45
 0 8 12 20069.1 1014.49 27
 0 -8 -12 20351.8 1034.77 66
 0 -8 -12 21050.2 1021.82 20
 0 8 -12 19705.1 1017.08 61
 0 -8 12 21322.7 1032.88 24
 0 8 -12 19938.7 996.333 47
 0 8 12 21852.5 1056.85 32
 0 -8 -12 20157.4 1027.72 67
 0 -8 12 19717.6 1024.77 70
 0 -8 12 20589.1 1016.53 52
 0 8 12 19874.2 1028.84 15
 0 -8 12 21465.6 1023.25 48
 0 -8 -13 58459.2 2727.91 59
 0 -8 -13 60948.4 2755.1 67
 0 -8 13 54006.5 2725.73 56
 0 -8 -13 58962.3 2734.12 31
 0 8 -13 62310.1 2737.85 36
 0 -8 -13 51249.4 2725.24 20
 0 8 -13 60961.2 2753.51 15
 0 8 13 59124.8 2698.84 53
 0 8 13 62613.1 2735.84 27
 0 -8 13 56703.3 2730.76 63
 0 -8 13 58249.7 2745.58 70
 0 8 13 57945.8 2762.67 32
 0 -8 13 61477.2 2732.97 52
 0 8 13 59832.5 2752.39 15
 0 8 13 59924.1 2739.62 35
 0 -8 13 62250.4 2723.8 45
 0 -8 13 63205.1 2705.28 43
 0 -8 -13 63251.8 2762.34 66
 0 -8 -13 61766.2 2740.54 38
 0 8 -13 57244.9 2734.37 61
 0 -8 13 61097.3 2749.38 24
 0 -8 13 62246.3 2737.09 48
 0 8 -13 58926.4 2741.71 62
 0 8 -13 56639.9 2707.12 47
 0 -8 14 45036.4 1990.95 45
 0 -8 14 41187.9 2013.96 70
 0 8 -14 43129.6 2019.92 15
 0 8 14 37098.5 2018.27 32
 0 8 14 42375 1968.02 53
 0 -8 14 43585.9 1999.93 52
 0 8 -14 41879.1 2010.7 61
 0 -8 -14 45231.6 2014.66 38
 0 8 14 41017.9 2016.61 15
 0 8 14 43543.5 2009.1 27
 0 -8 14 44316.5 2025.2 24
 0 -8 -14 41992.3 2018.73 67
 0 8 14 43111 2008.85 35
 0 8 -14 38972.1 1969.65 47
 0 -8 -14 43112.9 2024.32 66
 0 8 -14 42660.6 1998.52 36
 0 -8 14 42026.5 2001.96 63
 0 -8 14 44066.3 1967.73 43
 0 -8 14 42508.7 2010.04 56
 0 -8 -14 43359 1999.48 59
 0 -8 14 44323.8 2006.33 48
 0 8 -14 41705 2011.3 62
 0 8 15 11205.7 764.408 32
 0 -8 15 14698.4 756.336 52
 0 -8 15 14332.9 755.907 48
 0 8 15 14067.7 778.001 15
 0 8 -15 13916 765.183 62
 0 8 -15 13749 743.719 36
 0 -8 15 13481.7 761.186 56
 0 8 15 11313.3 755.642 41
 0 -8 -15 14414.3 775.179 66
 0 -8 15 13751.6 772.513 70
 0 -8 15 14888 782.42 24
 0 -8 15 14722.9 717.372 43
 0 8 -15 13818.2 762.761 15
 0 8 15 14220.7 730.73 53
 0 8 15 14016.6 759.023 35
 0 8 -15 13941.2 763.62 61
 0 -8 15 13586 755.308 63
 0 8 -15 12529.1 714.104 47
 0 8 15 13989.8 763.388 27
 0 -8 -15 13982.5 745.229 59
 0 -8 15 14182.9 734.725 45
 0 -8 -15 14925 772.96 38
 0 8 -16 477.619 127.927 62
 0 8 -16 531.3 135.732 36
 0 -8 16 532.709 106.024 43
 0 -8 16 723.195 142.088 45
 0 -8 -16 704.698 134.068 59
 0 8 16 582.82 167.825 53
 0 -8 16 553.178 154.626 48
 0 8 -16 560.271 151.476 15
 0 -8 -16 721.763 154.05 38
 0 8 16 769.119 155.568 35
 0 -8 16 653.041 176.762 70
 0 8 -16 665.313 137.169 61
 0 8 16 840.179 175.816 15
 0 -8 16 598.707 182.324 24
 0 8 16 236.944 200.075 32
 0 -8 16 735.07 154.067 52
 0 -8 16 609.773 170.178 63
 0 -8 -16 753.777 162.628 66
 0 -8 16 721.062 187.97 56
 0 8 16 635.316 187.756 41
 0 8 17 123.344 136.785 15
 0 -8 -17 -11.5422 112.083 66
 0 8 17 -16.4195 86.6248 64
 0 8 17 109.923 191.579 32
 0 8 17 -80.1713 153.55 41
 0 8 -17 11.5008 115.118 62
 0 -8 17 46.6991 146.586 70
 0 8 -17 246.933 121.101 36
 0 8 -17 -11.1856 89.0369 61
 0 8 17 8.1948 109.419 70
 0 -8 17 -10.9888 161.166 56
 0 -8 -17 96.0092 119.382 38
 0 -8 17 94.6406 131.482 48
 0 -8 17 162.021 125.052 52
 0 -8 -17 -63.7469 121.664 20
 0 8 17 9.83306 104.737 35
 0 -8 17 40.0672 101.088 45
 0 8 -17 -32.074 125.15 15
 0 -8 -17 10.0136 98.749 39
 0 -8 17 -9.84354 141.877 63
 0 8 18 8694.62 574.062 32
 0 -8 -18 8449.89 519.86 39
 0 -8 18 8291.85 487.942 45
 0 8 18 6953.8 512.737 15
 0 -8 18 9070.22 555.018 56
 0 -8 -18 8631.6 545.606 66
 0 8 18 8328.63 539.989 41
 0 -8 18 8115.07 549.413 70
 0 8 -18 7609.98 517.262 15
 0 -8 18 8282.36 519.681 48
 0 8 -18 8244.61 533.969 61
 0 -8 18 8634.17 508.17 52
 0 8 -18 8071.19 498.544 36
 0 8 18 7636.29 498.468 35
 0 8 18 7371.8 482.532 70
 0 8 -18 8372.87 542.352 62
 0 -8 18 8147.13 521.245 63
 0 -8 -18 8476.72 551.763 61
 0 -8 -18 8716.01 539.465 55
 0 8 -19 7267.14 494.521 62
 0 8 19 6082.75 498.028 32
 0 -8 -19 6737.85 463.942 39
 0 -8 19 6903.98 465.357 48
 0 -8 -19 7758.53 508.536 61
 0 -8 19 7088.35 493.193 56
 0 -8 19 6842.92 500.785 70
 0 -8 19 7118.14 432.379 45
 0 -8 19 6946.72 477.468 63
 0 8 -19 7261.55 488.034 61
 0 8 -19 6589.64 470.9 15
 0 -8 19 6783.92 445.568 52
 0 -8 -19 6546.1 476.046 55
 0 8 19 6891.37 440.611 70
 0 8 19 7351.47 487.727 41
 0 8 19 6649.04 476.142 15
 0 -8 -19 7368.84 493.92 66
 0 8 -19 6966.82 445.941 36
 0 8 -20 1293.48 202.196 61
 0 8 -20 1379.86 178.462 36
 0 -8 -20 1384.29 216.715 55
 0 8 -20 1487.93 227.955 62
 0 -8 -20 1490.12 202.913 39
 0 8 20 1128.7 176.354 70
 0 -8 20 1469.05 189.787 52
 0 -8 -20 1317.51 222.687 66
 0 8 20 1268.8 256.637 32
 0 -8 20 1337.39 246.724 56
 0 -8 20 1394.23 207.378 48
 0 -8 20 1358.87 224.383 63
 0 8 -20 1255.97 203.949 15
 0 8 20 1583.61 223.131 41
 0 -8 20 1199.79 162.695 45
 0 -8 -20 1331.15 170.398 65
 0 -8 20 1257.94 241.231 70
 0 -8 -20 1504.02 229.121 61
 0 8 -21 10831.1 635.781 36
 0 8 21 11290.6 642.744 70
 0 -8 21 11214.4 708.446 24
 0 -8 -21 12095.3 705.197 66
 0 8 -21 10406.8 684.834 61
 0 -8 -21 11559.1 707.678 55
 0 -8 21 11763.2 724.44 70
 0 8 21 12194.1 682.714 41
 0 -8 21 11337.7 644.088 52
 0 -8 -21 11480 654.31 65
 0 -8 21 11272.7 623.159 45
 0 8 -21 10745 698.161 62
 0 8 -21 12163.4 689.234 15
 0 -8 21 11821.9 710.798 56
 0 -8 -21 13298.1 737.268 61
 0 -8 -21 10586.2 673.785 39
 0 -8 21 12665.8 678.714 48
 0 -8 22 289.643 199.163 70
 0 8 -22 343.895 157.987 62
 0 -8 22 232.267 142.941 48
 0 8 22 226.294 122.899 70
 0 8 22 190.694 182.985 32
 0 -8 -22 341.968 150.335 66
 0 -8 -22 443.536 169.515 61
 0 -8 -22 143.063 136.345 55
 0 8 -22 309.194 142.372 15
 0 8 22 226.416 124.89 41
 0 8 -22 145.873 127.328 61
 0 -8 -22 351.923 112.603 65
 0 -8 -22 298.753 151.232 39
 0 -8 22 396.686 204.654 56
 0 -8 22 357.965 126.871 52
 0 -8 22 343.511 196.929 24
 0 -8 23 3017.31 257.355 52
 0 -8 -23 3676.24 339.773 61
 0 -8 23 3334.58 346.741 24
 0 -8 23 3070.82 339.401 56
 0 -8 -23 3083.34 301.539 66
 0 -8 -23 2986.2 264.806 65
 0 8 -23 2875.9 293.421 61
 0 8 23 2840.41 258.239 70
 0 -8 23 3019.47 338.003 70
 0 -8 -23 3261.74 315.118 55
 0 8 -23 3020.98 283.677 15
 0 8 -23 2998.46 318.894 62
 0 -8 23 3248.36 284.135 48
 0 8 23 3213.69 328.273 32
 0 -8 -23 3259.47 306.499 39
 0 8 24 1948.96 276.44 73
 0 -8 24 2328.5 303.043 24
 0 8 24 1812.04 205.79 70
 0 -8 -24 1796.31 235.705 39
 0 -8 -24 1790.49 204.608 65
 0 8 -24 1575.99 242.833 62
 0 8 24 2167.12 267.154 32
 0 -8 24 1978.66 221.51 48
 0 8 -24 1793.15 214.63 15
 0 -8 -24 1938.33 268.828 61
 0 8 -24 1793.32 233.504 61
 0 -8 24 2210.4 295.837 56
 0 -8 24 2130.78 293.766 70
 0 -8 -24 1959 251.472 55
 0 -8 -24 2096.61 247.074 66
 0 8 -25 34736 1753.97 62
 0 8 -25 33050.1 1688.25 15
 0 -8 -25 35633.9 1721.57 19
 0 -8 -25 37328.7 1762.26 55
 0 8 25 37381.9 1766.13 73
 0 -8 25 34969.5 1691.34 48
 0 8 25 32676.8 1663.03 70
 0 -8 -25 37736.7 1776.27 61
 0 8 25 34167.5 1725.45 32
 0 -8 25 35475.8 1766.27 70
 0 -8 -25 34456.2 1730.93 39
 0 -8 -25 34270.5 1686.86 65
 0 -8 25 40005.2 1773.46 24
 0 -8 -25 36120 1728.71 66
 0 -8 25 34368.9 1748.96 56
 0 8 -25 35708.4 1740.72 61
 0 8 26 1142.95 207.396 32
 0 -8 26 1074.58 231.47 24
 0 -8 26 1364.09 246.17 70
 0 -8 -26 1312.45 206.421 55
 0 8 26 1476.29 240.63 73
 0 -8 -26 1146.77 191.352 18
 0 8 -26 1079.97 164.227 15
 0 8 -26 1330.65 191.524 61
 0 -8 -26 1168.85 179.931 19
 0 8 26 978.028 151.52 70
 0 -8 -26 1424.48 196.003 66
 0 -8 -26 1230.48 223.6 61
 0 -8 26 1046.27 166.158 48
 0 8 -26 1268.61 219.052 62
 0 -8 -26 972.429 155.107 65
 0 -8 -27 101.849 127.58 18
 0 -8 -27 211.813 117.004 19
 0 -8 27 272.47 185.954 24
 0 -8 27 150.336 174.188 70
 0 8 27 117.886 152.941 73
 0 -8 -27 239.37 148.319 55
 0 8 27 224.577 103.046 70
 0 -8 27 223.341 115.574 48
 0 -8 -27 126.347 87.0447 65
 0 8 -27 204.509 117.798 61
 0 -8 -27 186.536 110.739 66
 0 8 -27 172.328 148.827 62
 0 -8 -27 64.2776 154.633 61
 0 8 27 10.3304 131.102 32
 0 -8 -28 2301.04 268.739 61
 0 8 -28 1881.73 205.744 61
 0 8 28 1924.22 240.369 73
 0 8 28 1637.82 209.546 32
 0 -8 28 1576.45 245.595 70
 0 8 -28 1694.23 223.512 62
 0 -8 28 2009.67 264.921 24
 0 -8 -28 1942.15 197.435 66
 0 -8 -28 1940.31 207.728 19
 0 -8 -28 2073.53 232.468 18
 0 -8 -29 4789.77 349.501 18
 0 8 -29 4290.5 325.139 61
 0 -8 -29 4907.12 336.056 19
 0 8 -29 4161.9 352.638 62
 0 -8 29 5355.32 396.347 70
 0 -8 29 5102.03 385.349 24
 0 -8 -29 5615.36 396.647 61
 0 8 29 5028.93 367.551 73
 0 8 29 4846.42 340.829 32
 0 8 -30 2480.99 212.147 61
 0 -8 -30 2612.4 218.003 19
 0 8 30 2490.14 220.158 32
 0 -8 30 2738.95 271.201 70
 0 8 30 2604.45 242.044 73
 0 -8 -30 2859.76 240.375 18
 0 -8 -30 3217.01 280.244 61
 0 -8 30 2827.55 270.806 24
 0 8 -30 2736.28 253.04 62
 0 8 31 90.0944 101.146 73
 0 -8 -31 157.923 107.636 61
 0 -8 31 118.479 127.947 24
 0 -8 31 86.7783 143.706 56
 0 8 -31 93.5351 101.729 62
 0 -8 31 63.0156 120.756 70
 0 -8 -31 65.2485 76.3133 18
 0 -8 -32 72.8174 88.5079 61
 0 8 32 145.808 107.807 50
 0 8 -32 124.152 82.5565 16
 0 -8 32 79.1351 105.251 24
 0 8 32 162.158 78.9898 73
 0 8 -32 168.433 93.7653 62
 0 -8 32 133.796 116.701 70
 0 -8 -32 52.8767 58.5588 18
 0 8 -33 127.202 75.3788 62
 0 -8 -33 88.2713 79.9452 61
 0 -8 33 152.398 95.1926 70
 0 8 33 40.6055 83.404 50
 0 -8 33 57.2747 78.0748 24
 0 8 -33 -25.4064 59.8495 16
 0 8 34 89.8914 64.646 50
 0 8 -34 116.25 52.8215 62
 0 -8 34 115.119 70.2852 70
 0 -8 -34 75.2684 58.8897 61
 0 -9 0 16.6729 77.0812 1
 0 9 0 34.4706 78.9901 7
 0 -9 0 -36.1637 79.1518 5
 0 -9 0 40.7141 93.9246 45
 0 9 0 -15.9673 92.4571 16
 0 9 0 79.485 77.9751 12
 0 -9 0 84.7852 111.17 52
 0 9 0 190.119 87.6373 54
 0 9 0 44.6829 76.9566 30
 0 -9 0 -18.8576 84.2907 49
 0 9 0 78.7519 106.884 15
 0 9 0 116.32 80.9278 27
 0 9 0 71.781 96.0477 32
 0 9 0 27.7067 94.0144 47
 0 9 0 -9.44811 69.7789 44
 0 -9 0 34.0961 56.0637 6
 0 9 0 45.9454 72.0172 75
 0 -9 0 45.6872 88.9418 48
 0 -9 -1 19752.7 969.522 1
 0 9 1 19650.5 951.76 47
 0 9 1 18395.6 943.302 6
 0 9 1 18831.7 918.564 30
 0 -9 1 19278.3 946.398 45
 0 -9 1 19585.1 981.353 5
 0 9 -1 19165.3 972.12 7
 0 -9 -1 19076.4 948.585 52
 0 9 1 19008 942.335 32
 0 -9 -1 19386 940.395 49
 0 -9 -1 18372.9 937.616 43
 0 -9 -1 18372.1 935.155 48
 0 9 1 16471.6 903.466 44
 0 -9 -1 19801.3 985.401 5
 0 -9 1 18810 968.154 1
 0 9 -1 17265.5 901.751 44
 0 -9 1 17796.6 927.017 24
 0 9 -1 19855.1 943.01 32
 0 9 -1 19731.6 964.668 75
 0 9 1 18336.3 946.284 12
 0 9 -1 19563.6 955.949 12
 0 9 1 21243.1 975.259 69
 0 9 1 20524.2 972.216 15
 0 9 1 19251.8 930.643 54
 0 9 1 19698.4 960.577 75
 0 -9 1 19653.4 925.647 6
 0 9 -1 19929.8 950.273 47
 0 -9 1 19312.1 937.377 49
 0 9 1 19384.5 912.406 27
 0 -9 -1 19319.2 946.098 45
 0 9 -1 19816.5 969.494 16
 0 9 -1 19405.9 913.519 30
 0 9 1 18086.8 962.967 7
 0 9 -1 20387.4 931.03 54
 0 -9 1 19474.1 953.862 52
 0 -9 1 18556 939.931 48
 0 9 1 19274.3 964.253 16
 0 9 2 761.392 138.657 32
 0 -9 -2 1029.29 143.646 1
 0 9 -2 851.793 111.236 30
 0 -9 2 851.445 131.984 48
 0 -9 -2 857.3 137.651 43
 0 9 -2 934.335 139.263 75
 0 -9 2 1129.61 151.726 1
 0 9 -2 920.748 110.096 44
 0 -9 2 978.408 146.171 11
 0 9 2 814.771 113.64 44
 0 9 2 906.482 123.755 30
 0 9 2 944.667 128.471 6
 0 9 -2 1103.22 148.314 47
 0 9 2 948.027 134.44 12
 0 9 -2 900.448 119.827 54
 0 9 2 802.383 126.866 75
 0 9 2 1022.66 158.973 15
 0 -9 2 1088.74 142.376 43
 0 -9 2 1014.1 153.133 52
 0 -9 -2 890.699 142.487 5
 0 9 2 882.135 138.259 16
 0 9 -2 1024.75 156.625 16
 0 9 -2 852.433 130.536 12
 0 9 2 878.629 123.258 27
 0 -9 -2 955.638 137.727 49
 0 -9 -2 1053.42 131.159 31
 0 9 -2 920.395 133.758 5
 0 9 2 1077.98 146.05 69
 0 -9 -2 878.089 126.62 48
 0 9 -2 1044 145.085 7
 0 9 2 881.228 137.528 7
 0 -9 -2 1012.2 142.999 58
 0 -9 2 1049.62 132.912 49
 0 -9 -2 891.998 135.122 45
 0 -9 2 1057.29 144.835 58
 0 9 -2 911.996 129.229 32
 0 9 2 961.253 144.157 47
 0 -9 2 917.966 127.128 24
 0 -9 2 928.323 116.535 6
 0 9 3 9439.84 501.108 30
 0 9 -3 8724.84 521.079 12
 0 9 -3 9437.24 513.222 32
 0 9 -3 9739.93 513.628 62
 0 9 3 9506.75 538.395 15
 0 9 3 9966.93 538.99 69
 0 -9 3 9167.53 519.398 48
 0 9 -3 9449.76 533.921 5
 0 9 3 9365.1 499.14 27
 0 9 3 8916.32 482.098 25
 0 -9 -3 9732.4 515.363 31
 0 9 -3 10388.3 554.053 16
 0 -9 3 9892.33 500.602 6
 0 -9 -3 9554.74 519.771 68
 0 -9 3 9710.1 527.859 58
 0 9 3 8728.11 477.883 72
 0 9 3 9370.54 525.967 32
 0 -9 -3 9461.52 526.726 58
 0 9 3 8991.16 531.133 16
 0 9 -3 9365.68 520.331 47
 0 9 3 9481.44 529.489 47
 0 9 -3 9233.74 543.198 7
 0 -9 -3 9329.13 518.99 43
 0 -9 -3 9337.42 502.814 9
 0 9 -3 9790.1 501.513 54
 0 9 3 8019.35 486.091 44
 0 -9 -3 10358.9 556.128 66
 0 9 3 8553.56 518.05 6
 0 -9 -3 9779.07 539.665 1
 0 -9 3 9613.01 549.212 1
 0 -9 3 9529.13 552.898 11
 0 -9 -3 10255.8 565.048 5
 0 9 -3 9107.86 479.609 44
 0 -9 -3 8787.05 504.151 48
 0 -9 3 9266.89 514.366 43
 0 -9 3 9535.33 516.997 24
 0 9 -3 9173.12 484.224 30
 0 -9 3 9738.9 513.105 49
 0 9 -3 10099.4 546.215 75
 0 9 4 7575.43 421.001 27
 0 9 4 7588.09 449.373 69
 0 9 4 6113.58 405.01 44
 0 9 4 6964.01 399.492 72
 0 -9 4 7259.99 433.896 24
 0 -9 -4 7070.97 439.689 58
 0 9 4 7159.99 443.997 6
 0 -9 4 7193.75 437.166 48
 0 9 -4 7482.94 431.41 62
 0 -9 4 7386.26 434.125 43
 0 9 -4 7455.35 429.446 32
 0 -9 -4 7764.17 454.039 1
 0 9 4 7328.01 445.697 47
 0 9 -4 7464.7 463.26 7
 0 -9 -4 7376.67 468.151 5
 0 9 -4 8233 472.36 16
 0 9 -4 6928.2 392.887 44
 0 -9 -4 8323.39 447.713 68
 0 -9 4 7874.97 444.898 58
 0 9 -4 7740.94 440.253 47
 0 9 -4 8308.41 468.544 15
 0 9 4 7286.41 451.536 15
 0 9 4 7283.91 407.751 25
 0 9 -4 7552.41 452.839 5
 0 -9 -4 7577.72 439.229 43
 0 9 -4 8007.3 420.53 54
 0 -9 4 7416.46 468.584 11
 0 9 4 7732.84 450.016 32
 0 9 4 7437.44 424.96 30
 0 -9 -4 8576.11 445.806 31
 0 -9 4 8464.92 423.139 6
 0 -9 -4 7969.65 428.321 9
 0 -9 -5 919.655 117.604 9
 0 9 -5 876.885 101.146 44
 0 -9 5 783.081 133.401 43
 0 9 5 973.187 142.11 2
 0 9 -5 778.156 116.758 62
 0 9 -5 958.287 152.375 15
 0 9 -5 717.861 118.343 32
 0 9 -5 996.916 143.469 7
 0 9 5 856.514 127.056 25
 0 9 5 945.554 143.298 30
 0 9 -5 850.044 145.743 16
 0 9 -5 744.966 122.981 5
 0 -9 -5 753.877 135.873 58
 0 -9 5 963.868 150.384 11
 0 -9 -5 973.016 136.342 31
 0 9 5 787.834 138.379 27
 0 9 5 877.298 151.24 15
 0 -9 5 810.047 132.165 24
 0 9 5 939.997 136.236 69
 0 -9 -5 854.557 137.69 43
 0 -9 -5 959.942 140.099 49
 0 -9 5 816.798 138.384 45
 0 -9 -5 851.994 132.804 68
 0 -9 5 929.512 109.17 6
 0 9 -5 1012.15 137.438 47
 0 9 5 766.364 144.434 32
 0 9 5 753.233 101.751 72
 0 -9 5 1069.7 144.759 48
 0 9 5 717.65 123.427 6
 0 -9 5 759.182 131.422 58
 0 9 -5 919.017 115.627 54
 0 -9 -6 14.8514 88.7829 68
 0 -9 6 74.6313 88.7693 70
 0 9 6 21.3886 64.2694 72
 0 -9 -6 33.7467 62.4097 9
 0 9 -6 -16.6661 70.8186 5
 0 9 -6 66.9559 81.2847 7
 0 9 6 -7.95296 97.9808 14
 0 -9 -6 93.6769 98.9662 49
 0 9 -6 84.0672 111.322 15
 0 9 6 37.925 100.391 25
 0 -9 6 65.8146 105.408 48
 0 9 6 -26.0901 76.8637 6
 0 -9 6 -37.1079 101.927 24
 0 -9 6 33.4354 95.7062 43
 0 9 -6 12.7755 75.5864 32
 0 9 -6 49.0088 92.3247 47
 0 9 6 -26.1795 80.6817 2
 0 9 -6 123.82 74.5197 54
 0 -9 6 71.7623 103.807 45
 0 9 6 67.1196 110.609 27
 0 9 6 188.466 121.7 32
 0 9 6 81.8605 105.165 15
 0 9 -6 14.4512 66.8111 62
 0 9 6 166.816 115.519 30
 0 -9 6 36.006 91.2684 58
 0 -9 -6 35.3842 85.9112 31
 0 -9 6 60.3118 104.745 52
 0 9 6 46.9945 83.9764 69
 0 -9 7 12085.2 679.1 56
 0 9 7 13301.5 710.952 15
 0 -9 7 12638.7 694.638 24
 0 -9 -7 13761.6 691.41 9
 0 -9 7 13863.2 700.342 45
 0 9 7 12331 651.429 53
 0 -9 -7 13530.6 721.894 66
 0 9 7 12424.1 680.212 27
 0 -9 7 14386.3 711.257 52
 0 -9 -7 13319.9 698.022 49
 0 9 7 14266.6 722.536 32
 0 9 7 11937.7 665.241 25
 0 9 7 12603 708.836 2
 0 9 -7 13411.8 711.041 5
 0 -9 7 13646.8 698.493 58
 0 9 -7 14615.2 727.108 15
 0 -9 7 14057.9 694.141 43
 0 9 -7 13428.7 692.269 47
 0 -9 7 13364.3 703.417 70
 0 9 7 13510.5 708.336 14
 0 9 7 11993.7 661.037 72
 0 9 -7 13273.9 696.057 62
 0 9 -7 13484.1 682.501 32
 0 -9 7 12681.7 695.538 48
 0 9 -7 13373 662.666 54
 0 -9 8 6439.72 409.82 52
 0 9 8 6549.45 410.365 14
 0 9 -8 7067.68 393.807 32
 0 9 8 5623.37 369.48 72
 0 9 8 6696.76 426.859 47
 0 -9 8 6735.34 408.454 45
 0 -9 8 5854.92 390.492 56
 0 -9 8 6064.94 405.642 48
 0 9 -8 6154.48 395.137 62
 0 -9 8 6942.11 399.741 43
 0 -9 -8 6982.21 407.23 20
 0 -9 -8 7092.91 430.607 66
 0 9 8 6974.19 435.904 32
 0 9 8 6619.84 419.894 15
 0 9 8 6079.03 365.131 53
 0 9 8 5489.38 386.08 27
 0 9 -8 6825.6 400.644 47
 0 9 -8 6968.25 425.344 15
 0 -9 8 6293.47 408.03 24
 0 -9 8 6387.94 406.44 70
 0 -9 -8 6347.92 403.616 49
 0 9 9 32.3015 103.854 53
 0 9 -9 177.59 94.9325 32
 0 9 -9 131.965 105.411 47
 0 -9 9 108.587 107.87 45
 0 -9 -9 212.916 118.886 49
 0 -9 9 197.703 102.25 43
 0 9 9 240.479 140.212 15
 0 9 9 136.325 136.407 27
 0 -9 -9 117.682 94.8831 20
 0 -9 9 212.495 129.439 52
 0 9 -9 8.06858 76.027 61
 0 -9 -9 161.04 107.979 66
 0 -9 9 45.9806 99.8767 56
 0 -9 9 50.1419 106.987 24
 0 9 -9 244.247 130.015 15
 0 -9 -9 95.9518 108.09 59
 0 9 -9 89.0354 85.2314 62
 0 9 9 58.8917 98.6061 14
 0 9 9 178.915 141.246 47
 0 -9 9 137.293 119.314 70
 0 -9 10 1660.3 199.619 70
 0 9 10 1316.86 179.74 14
 0 9 -10 1734.06 182.134 47
 0 9 -10 1605.03 170.751 32
 0 9 10 1436.08 207.503 27
 0 -9 -10 1652.83 187.667 20
 0 -9 -10 1797.43 203.88 66
 0 9 10 2037.75 221.17 15
 0 9 10 1713.06 216.808 47
 0 -9 -10 1924.73 194.285 38
 0 -9 10 1583.29 200.504 24
 0 -9 -10 1774.87 204.429 68
 0 -9 -10 1564.89 193.441 31
 0 -9 10 1707.88 179.066 43
 0 -9 10 1698.09 190.411 56
 0 -9 10 1881.74 200.462 45
 0 9 -10 1773.49 187.703 61
 0 -9 -10 1452.82 181.209 59
 0 9 -10 1902.6 211 15
 0 9 10 1745.57 176.646 53
 0 9 -10 1769.69 186.362 62
 0 -9 10 1812.84 210.713 52
 0 9 11 23946.2 1207.55 47
 0 9 -11 23700.3 1187.31 36
 0 9 -11 23619.8 1185.31 61
 0 -9 -11 24330 1185.78 38
 0 -9 -11 25366.8 1206.62 67
 0 -9 11 23263.3 1193.43 70
 0 -9 11 21417.5 1173.8 56
 0 -9 -11 23617.5 1193.57 59
 0 9 11 22579.6 1195.94 15
 0 9 -11 24976.7 1210.28 15
 0 -9 -11 24560.6 1192.48 31
 0 -9 11 23484.9 1189.91 48
 0 -9 11 24426 1184.82 45
 0 -9 -11 25096.9 1194.36 20
 0 9 -11 22663.5 1167.45 47
 0 9 11 24333.5 1194.78 14
 0 9 11 23615.4 1181.1 27
 0 -9 -11 23624.6 1194.38 68
 0 -9 11 24906.8 1172.51 43
 0 9 11 23426.3 1145.22 53
 0 -9 11 24610 1202.73 24
 0 -9 -11 24546.4 1210.92 66
 0 9 -11 24347.9 1157.01 32
 0 9 -11 24104.4 1189.61 62
 0 -9 11 24861.7 1195.34 52
 0 -9 -12 3714.76 301.626 67
 0 -9 -12 3281.04 285.855 59
 0 -9 12 3270.14 288.958 56
 0 -9 -12 3461.59 292.148 31
 0 9 12 3622.25 344.511 32
 0 9 -12 3152.82 276.847 61
 0 -9 12 3983.34 306.445 52
 0 9 12 3886.61 320.538 27
 0 9 -12 3568.02 295.455 36
 0 -9 12 3558.68 301.494 48
 0 -9 12 3229.55 288.419 70
 0 9 12 3460.29 304.411 15
 0 -9 12 3876.99 313.37 24
 0 -9 12 3656.09 270.666 43
 0 -9 -12 3899.84 296.135 38
 0 -9 -12 3868.22 311.505 68
 0 9 12 3573.77 270.792 53
 0 -9 12 3690.29 292.683 45
 0 9 -12 3448.83 272.011 47
 0 9 -12 3582.53 287.664 62
 0 -9 -12 4047 317.352 66
 0 -9 -12 3281.73 284.807 20
 0 9 -12 3937.6 315.357 15
 0 -9 13 899.163 172.732 70
 0 -9 -13 834.474 145.509 59
 0 -9 13 608.563 170.101 48
 0 -9 13 833.328 179.014 52
 0 9 13 797.321 217.026 32
 0 9 13 718.781 161.928 53
 0 9 -13 608.998 131.283 61
 0 9 -13 827.587 155.425 36
 0 -9 -13 861.773 155.193 38
 0 9 -13 763.229 175.187 15
 0 -9 13 1297.23 176.433 45
 0 9 13 731.562 178.043 15
 0 -9 13 862.261 173.295 56
 0 -9 -13 651.411 151.44 66
 0 -9 -13 985.286 167.021 20
 0 -9 -13 782.764 158.045 67
 0 -9 -13 738.182 163.786 31
 0 9 13 719.32 165.111 35
 0 9 -13 881.433 140.212 47
 0 -9 13 733.117 182.832 24
 0 9 13 680.788 204.035 27
 0 9 -13 767.38 148.589 62
 0 -9 13 996.01 145.862 43
 0 9 -14 16594.8 870.134 15
 0 -9 -14 14990.6 845.945 20
 0 -9 14 16109.6 850.516 52
 0 -9 14 16682.3 840.624 45
 0 9 -14 15415.5 846.265 61
 0 -9 14 15558.2 867.456 24
 0 9 -14 15835.4 846.987 36
 0 -9 -14 15788.6 853.837 38
 0 9 14 15051 808.639 53
 0 -9 14 16370.7 814.659 43
 0 9 -14 16116 853.606 62
 0 -9 14 15375 860.168 70
 0 -9 -14 16141 845.203 59
 0 9 14 15608.6 852.959 35
 0 9 -14 14965.8 813.05 47
 0 9 14 15994.4 875.432 15
 0 -9 14 15404.9 847.396 56
 0 -9 -14 16807.7 876.681 66
 0 9 14 12869 863.399 32
 0 -9 14 16697.2 861.773 48
 0 -9 -14 16697.7 872.842 67
 0 9 14 16770.4 858.394 27
 0 9 15 3697.35 360.249 41
 0 -9 -15 4515.63 337.445 38
 0 9 15 3778.47 308.033 53
 0 -9 15 3744.97 331.109 56
 0 -9 15 3918.19 284.513 43
 0 9 -15 3619.11 286.014 47
 0 9 -15 3865.28 317.746 61
 0 9 15 4057.82 350.007 15
 0 -9 15 4141.44 340.411 70
 0 -9 -15 3564.22 303.836 59
 0 9 15 3255.59 361.693 32
 0 -9 -15 4005.47 341.04 66
 0 -9 15 4457.38 359.83 24
 0 9 15 4262.17 358.933 27
 0 -9 15 4133.2 340.31 48
 0 9 15 4213.72 333.34 35
 0 -9 15 4150.67 315.684 45
 0 9 -15 4227.26 323.503 36
 0 -9 15 4362.88 330.903 52
 0 -9 -15 4469.57 346.771 67
 0 9 -15 4251 343.856 15
 0 -9 16 200.588 151.293 70
 0 9 -16 410.43 136.035 62
 0 -9 16 268.745 103.029 43
 0 -9 16 304.92 141.191 52
 0 9 -16 169.108 147.795 15
 0 -9 -16 398.28 128.946 39
 0 -9 -16 186.515 138.194 38
 0 9 16 148.195 198.805 27
 0 -9 16 284.948 130.169 45
 0 -9 -16 166.276 139.461 67
 0 9 16 331.502 163.59 15
 0 -9 16 89.4779 161.582 56
 0 9 -16 245.553 120.912 36
 0 9 16 212.104 187.646 41
 0 -9 16 228.676 166.789 48
 0 -9 16 423.69 187.129 24
 0 9 -16 331.1 125.438 61
 0 -9 -16 217.025 114.129 59
 0 9 16 233.7 131.954 35
 0 -9 -16 157.69 136.19 66
 0 -9 16 248.302 109.227 58
 0 9 16 269.849 211.856 32
 0 -9 17 2154.75 280.963 24
 0 9 -17 2312.69 257.304 15
 0 -9 17 1823.34 258.485 56
 0 9 17 1953.78 251.078 15
 0 -9 -17 2329.53 240.855 39
 0 -9 17 2099.88 262.709 70
 0 -9 17 2211.72 199.25 43
 0 -9 17 2536.98 253.447 52
 0 9 -17 2097.3 242.423 62
 0 9 17 2194.42 282.853 27
 0 -9 -17 2491.41 272.291 66
 0 9 -17 2347.87 245.554 61
 0 -9 -17 1978.04 243.972 38
 0 -9 17 1958.34 256.346 48
 0 9 -17 2184.02 235.457 36
 0 9 17 2236.71 282.212 41
 0 9 17 2312.47 218.716 70
 0 -9 17 2425.22 219.666 58
 0 9 17 2266.1 245.861 35
 0 -9 -17 2297.08 227.411 59
 0 -9 17 2163.03 224.894 45
 0 9 17 2089.03 302.32 32
 0 -9 -18 2702.49 264.549 55
 0 -9 18 2340.78 246.771 52
 0 -9 18 2179.39 205.787 58
 0 9 18 2331.04 316.233 32
 0 9 -18 2097.92 240.657 61
 0 9 18 2157.87 232.894 35
 0 -9 -18 2652.6 282.915 61
 0 9 18 2016.44 210.101 70
 0 9 -18 2180.32 255.497 62
 0 -9 -18 2928.85 286.337 66
 0 -9 18 2363.71 283.704 70
 0 -9 18 2023.54 218.188 45
 0 -9 -18 1880.5 248.279 38
 0 9 18 1794.48 250.158 15
 0 -9 -18 2170.44 243.843 39
 0 -9 18 2267.55 283.845 56
 0 9 18 2416.99 286.275 41
 0 -9 18 2327.13 258.006 48
 0 9 -18 2110.46 258.427 15
 0 -9 18 2117 284.663 24
 0 -9 -19 117.766 140.347 66
 0 -9 19 79.2272 170.437 70
 0 -9 -19 53.4275 149.542 61
 0 -9 -19 133.805 120.384 39
 0 -9 19 87.1347 108.989 45
 0 9 -19 164.029 150.574 15
 0 9 19 24.6318 101.739 70
 0 9 19 84.1018 142.214 15
 0 9 -19 174.564 115.355 61
 0 9 19 53.648 200.096 32
 0 9 -19 65.0293 138.602 62
 0 -9 -19 -36.5148 138.667 38
 0 9 19 219.282 168.008 41
 0 -9 19 226.299 138.837 52
 0 -9 -19 148.79 132.998 55
 0 -9 19 49.9105 182.43 56
 0 -9 19 248.473 169.009 48
 0 -9 -20 6068.1 426.343 39
 0 -9 20 5784.47 404.246 52
 0 9 20 6938.08 502.556 32
 0 -9 -20 5755.81 431.97 55
 0 -9 20 5642.24 454.181 70
 0 -9 -20 5736.02 384.28 65
 0 9 -20 5735.44 427.533 15
 0 -9 -20 6111.4 453.059 66
 0 9 -20 5925.35 446.755 62
 0 -9 20 5882.13 422.321 48
 0 9 -20 5638.18 427.975 61
 0 9 20 5041.41 368.894 70
 0 -9 20 5664.07 459.743 56
 0 -9 -20 5958.03 455.091 61
 0 -9 20 5684.37 381.758 45
 0 9 20 5825.76 433.149 41
 0 -9 -21 940.094 178.353 39
 0 -9 21 867.188 232.414 56
 0 -9 21 837.232 216.065 70
 0 -9 -21 845.025 182.554 55
 0 9 -21 814.414 184.95 15
 0 -9 -21 749.29 132.521 65
 0 -9 21 912.779 144.132 45
 0 -9 21 800.848 157.245 52
 0 -9 -21 1173.95 217.378 61
 0 -9 -21 893.389 191.154 66
 0 9 -21 656.633 156.997 61
 0 9 21 835.408 144.328 70
 0 9 21 1056.19 196.216 41
 0 9 21 1349.68 249.129 32
 0 9 -21 789.211 183.398 62
 0 -9 21 1048.96 189.939 48
 0 9 -22 -41.0194 141.985 62
 0 9 22 181.719 183.199 32
 0 -9 22 235.766 114.086 52
 0 -9 22 152.098 176.172 70
 0 9 -22 234.05 143.351 15
 0 -9 -22 25.9073 125.995 66
 0 -9 -22 145.284 88.474 65
 0 -9 -22 244.044 141.365 55
 0 -9 22 277.377 154.477 48
 0 9 22 363.601 149.311 41
 0 -9 -22 83.0072 163.831 61
 0 -9 22 194.123 198.827 56
 0 9 -22 127.902 118.457 61
 0 -9 -22 303.697 146.837 39
 0 -9 23 627.578 233.783 56
 0 -9 23 593.815 134.086 52
 0 -9 23 670.126 167.271 48
 0 -9 -23 604.584 156.902 39
 0 -9 -23 427.351 112.543 65
 0 9 23 441.114 194.24 32
 0 9 -23 587.04 156.594 15
 0 -9 -23 390.043 157.405 66
 0 -9 -23 688.413 178.569 55
 0 -9 -23 508.957 170.978 61
 0 9 -23 461.069 167.795 62
 0 -9 23 534.155 203.526 70
 0 9 -23 449.246 144.706 61
 0 9 -24 3433.41 321.029 62
 0 -9 -24 2823.45 282.024 39
 0 -9 -24 3103.91 303.02 55
 0 9 -24 2781.16 279.82 61
 0 -9 -24 3221.31 298.969 66
 0 -9 24 2624.5 314.649 70
 0 -9 -24 3177.26 320.572 61
 0 -9 -24 2886.4 245.326 65
 0 9 24 2959.22 319.668 73
 0 9 -24 2802.83 266.47 15
 0 -9 24 2743.88 241.371 52
 0 -9 24 3518.74 351.015 56
 0 -9 24 2858.81 271.786 48
 0 -9 24 3170.68 342.543 24
 0 9 24 2977.38 308.453 32
 0 9 -25 10429.7 682.613 62
 0 -9 -25 11037.5 653.016 19
 0 -9 -25 12468.7 701.293 55
 0 9 -25 11493.3 647.253 15
 0 -9 25 11778.1 709.921 70
 0 9 -25 11362.6 670.09 61
 0 -9 25 11562.5 711.576 24
 0 9 25 11645.8 690.973 32
 0 -9 -25 11242.6 666.857 39
 0 9 25 11562.2 710.876 73
 0 -9 -25 11387.2 710.369 61
 0 -9 25 11182.5 697.443 56
 0 -9 -25 11986 681.547 66
 0 -9 26 46.7073 181.504 56
 0 -9 -26 23.1749 116.831 55
 0 9 -26 -24.2057 124.651 62
 0 -9 26 62.7575 115.165 48
 0 -9 -26 -47.8691 92.9662 19
 0 -9 -26 -32.8097 107.845 18
 0 -9 26 131.879 188.053 24
 0 -9 26 86.3112 172.598 70
 0 9 -26 16.6595 93.7626 15
 0 -9 -26 -20.6463 106.323 66
 0 9 26 242.209 168.243 73
 0 9 26 -42.8452 143.603 32
 0 -9 -26 -37.6984 138.958 61
 0 9 -26 61.2884 91.9513 61
 0 9 -27 2247.56 247.823 62
 0 -9 27 2300.12 272.173 70
 0 -9 27 2548.41 222.98 48
 0 9 27 2235.64 264.626 73
 0 -9 -27 2168.12 230.673 18
 0 -9 -27 2756.2 276.481 61
 0 9 27 2100.17 240.39 32
 0 9 -27 2182.13 216.828 61
 0 -9 27 2268.85 274.002 56
 0 -9 -27 2321.07 223.139 66
 0 -9 27 2567.02 292.355 24
 0 -9 -27 2250.59 216.403 19
 0 9 -28 446.608 102.69 61
 0 -9 28 480.192 170.819 70
 0 -9 -28 342.812 146.915 61
 0 -9 -28 334.925 100.336 19
 0 -9 -28 367.436 116.199 18
 0 -9 -28 516.736 110.251 66
 0 9 28 516.001 163.835 73
 0 -9 28 296.989 164.347 24
 0 9 -28 642.047 148.221 62
 0 9 28 307.363 128.733 32
 0 -9 28 340.144 180.9 56
 0 -9 28 412.501 110.285 48
 0 -9 -29 2658.61 223.663 18
 0 9 29 2804.07 254.132 73
 0 9 29 2325.77 218.261 32
 0 -9 29 2421.23 261.295 56
 0 -9 29 2734.78 265.792 24
 0 -9 -29 2761.4 257.351 61
 0 -9 -29 2032.83 188.914 19
 0 -9 29 2528.3 258.99 70
 0 9 -29 2216.98 227.454 62
 0 -9 30 1367.87 187.815 70
 0 9 30 1059.34 138.419 32
 0 -9 -30 1358.31 146.602 18
 0 9 -30 1482.82 171.877 62
 0 -9 -30 1332.25 178.044 61
 0 -9 30 1206.24 183.143 24
 0 9 30 1346.73 175.313 73
 0 -9 31 3956.56 263.434 29
 0 -9 -31 3065.27 232.767 18
 0 -9 31 3831.56 283.885 70
 0 -9 31 3876.41 285.924 24
 0 9 31 3774.4 276.864 50
 0 9 -31 3483.08 260.788 62
 0 9 31 4157.76 274.331 73
 0 9 -31 3512.59 262.464 16
 0 -9 -31 4185.34 290.887 61
 0 -9 32 1303.23 146.147 24
 0 -9 -32 1219.11 142.639 61
 0 9 -32 1184.61 127.428 16
 0 -9 32 1183.7 146.486 70
 0 9 32 1095.37 120.274 73
 0 9 -32 1050.08 123.866 62
 0 9 32 1312.79 143.294 50
 0 -9 33 1671.71 144.6 24
 0 -9 -33 1881.4 153.048 61
 0 -9 33 1712.88 150.207 70
 0 10 0 3379.98 255.366 44
 0 10 0 4184.09 297.648 32
 0 10 0 4128.6 320.228 15
 0 10 0 4161.5 304.07 75
 0 -10 0 4250.76 295.268 49
 0 10 0 4087.9 309.517 69
 0 -10 0 3554.24 282.36 48
 0 -10 0 4270.89 305.354 45
 0 10 0 4044.58 302.302 47
 0 -10 0 4016.28 302.028 52
 0 10 0 3926.46 268.69 30
 0 10 0 4366.86 318.628 16
 0 -10 0 4141.67 283.15 31
 0 10 1 9400.52 522.236 16
 0 -10 1 7890.4 469.201 24
 0 -10 1 8130.19 481.8 49
 0 -10 1 8391.4 487.829 48
 0 -10 -1 8267.74 494.713 45
 0 10 -1 8697.67 517.099 16
 0 -10 -1 8401.43 489.984 43
 0 10 1 7998.18 453.301 27
 0 10 -1 9141.48 494.924 32
 0 10 1 9169.78 515.527 69
 0 10 1 8640.23 505.063 75
 0 -10 -1 8254.97 483.816 68
 0 10 -1 8362.18 502.455 75
 0 10 -1 7682.01 448.571 44
 0 10 1 8939.49 504.29 47
 0 10 -1 8683.62 498.447 47
 0 10 1 8153.17 463.634 30
 0 10 -1 7927.99 456.314 30
 0 10 1 8691.31 517.701 15
 0 -10 1 8902.55 500.699 45
 0 -10 -1 8461.55 479.306 31
 0 10 1 7188.62 448.815 44
 0 -10 -1 8345.95 486.016 48
 0 10 1 8856.81 498.619 32
 0 -10 -1 8585.07 489.634 49
 0 -10 1 8303.51 500.027 52
 0 -10 2 39846 1930.72 24
 0 10 -2 45828.9 1981.24 75
 0 -10 -2 44197.9 1963.89 58
 0 -10 2 42518.9 1956.54 58
 0 -10 2 40476.3 1943.67 48
 0 10 -2 41273.2 1922.68 54
 0 -10 -2 44044.9 1951 68
 0 -10 2 39383.9 1944.43 45
 0 -10 -2 41386.2 1944.53 43
 0 -10 2 44229.5 1946.83 49
 0 10 -2 41477.3 1906.75 30
 0 10 2 35815.4 1901.86 44
 0 10 2 42321.2 1959.23 47
 0 10 2 40760.3 1962.3 69
 0 -10 -2 42240.9 1947.35 49
 0 10 2 43917 1978.61 15
 0 10 2 43130.6 1964.55 75
 0 10 -2 44612.2 1986.1 16
 0 10 2 42647.3 1921.85 30
 0 -10 2 39622.3 1937.79 43
 0 -10 -2 37171.3 1912.04 9
 0 10 2 41205.9 1910.96 27
 0 10 -2 37899.2 1897.88 44
 0 -10 -2 48107.6 2001.22 66
 0 10 -2 43494.8 1954.18 47
 0 10 2 44074.6 1956.86 32
 0 10 -2 43595.1 1943.68 32
 0 10 2 47143.5 1987.56 16
 0 -10 -2 42874.2 1941.45 31
 0 -10 -2 38696.7 1929.69 48
 0 -10 2 42063 1959.41 52
 0 10 -3 787.538 150.386 47
 0 10 3 563.798 146.401 47
 0 10 -3 691.469 135.709 32
 0 10 3 350.555 98.5739 6
 0 -10 -3 826.917 155.8 58
 0 -10 3 907.917 151.765 48
 0 10 -3 678.507 109.294 30
 0 -10 -3 535.804 143.15 66
 0 -10 -3 526.92 96.8678 9
 0 10 3 572.505 131.985 30
 0 10 3 607.534 131.133 27
 0 10 3 751.839 169.611 15
 0 -10 -3 728.252 137.254 31
 0 10 -3 624.918 106.112 44
 0 10 -3 769.259 122.511 54
 0 10 3 681.058 137.378 69
 0 -10 3 713.078 130.091 49
 0 -10 3 802.814 152.707 58
 0 10 3 606.722 152.768 32
 0 -10 3 586.855 139.71 43
 0 -10 3 701.36 131.151 24
 0 10 -3 720.453 161.862 16
 0 10 -3 559.859 129.563 75
 0 -10 -3 673.275 136.917 68
 0 -10 -3 656.773 135.757 43
 0 10 4 1897.95 198.093 30
 0 10 -4 2087.31 226.375 16
 0 -10 -4 2245.73 211.709 43
 0 10 -4 1693.22 156.598 44
 0 10 4 2059.44 224.843 47
 0 -10 4 1877.73 205.692 58
 0 10 -4 1840.21 179.91 62
 0 10 4 2072.25 209.236 69
 0 -10 4 1902.04 197.248 24
 0 10 -4 2340.29 201.995 32
 0 -10 4 1943.36 209.931 48
 0 10 4 1826.49 188.315 27
 0 10 -4 2247.65 205.744 47
 0 -10 4 1912.2 191.303 49
 0 10 4 1752.25 157.872 72
 0 -10 -4 2376.8 221.693 58
 0 -10 -4 2254.95 203.853 31
 0 10 -4 1808.07 175.364 54
 0 -10 -4 1627.31 191.032 68
 0 10 4 2123.91 227.682 32
 0 -10 4 1867.23 198.548 43
 0 -10 -4 1968.47 222.441 66
 0 10 4 2188.85 227.974 15
 0 10 -4 1877.26 205.307 75
 0 10 4 2063.29 181.518 25
 0 10 -4 1872.67 223.87 15
 0 10 -5 105.671 104.318 75
 0 10 5 104.211 141.438 32
 0 -10 -5 -40.946 106.155 49
 0 10 -5 43.409 90.0149 32
 0 10 5 65.3543 118.336 15
 0 10 -5 -15.0874 76.0961 62
 0 10 5 63.1929 105.696 14
 0 10 -5 150.454 111.286 47
 0 -10 5 -21.8254 87.8938 49
 0 -10 5 89.7075 111.137 24
 0 10 5 79.715 140.192 47
 0 -10 5 82.5289 125.137 45
 0 10 -5 123.092 128.515 15
 0 10 5 -35.2776 91.4929 69
 0 -10 5 66.4709 111.874 58
 0 -10 5 116.562 116.31 43
 0 10 5 -5.72952 108.211 25
 0 10 -5 109.095 120.403 16
 0 10 5 79.1388 113.229 27
 0 10 -5 110.695 71.2623 44
 0 10 5 33.517 62.1892 72
 0 -10 -5 124.72 102.452 68
 0 10 -5 111.745 80.1358 54
 0 -10 -5 47.5388 95.2324 31
 0 -10 5 25.0761 119.208 48
 0 -10 -6 16922.9 824.687 20
 0 10 -6 15820.7 817.146 62
 0 -10 6 15319 827.945 48
 0 -10 -6 16185.5 829.86 49
 0 10 -6 15899.3 810.238 32
 0 10 6 15753.7 845.572 15
 0 -10 6 16371 812.881 49
 0 -10 6 15626.6 818.146 43
 0 10 -6 16906 856.219 15
 0 10 6 16636.7 844.42 14
 0 10 6 17930.4 857.442 32
 0 10 -6 16364.9 825.249 47
 0 10 6 13393.6 772.719 72
 0 10 -6 15494.9 789.664 54
 0 -10 6 15659.2 826.638 24
 0 -10 6 16289.7 831.418 58
 0 -10 6 15708.9 829.781 45
 0 -10 -6 16082.2 837.062 68
 0 10 6 16329 837.11 69
 0 -10 -6 16567.7 829.675 31
 0 10 -6 15894.5 858.198 16
 0 -10 6 15619.7 833.33 52
 0 10 6 13814.1 795.545 27
 0 10 7 11139.5 623.297 32
 0 10 -7 10678.2 589.488 47
 0 -10 -7 11120.5 592.323 20
 0 -10 7 10259.1 600.965 52
 0 10 -7 10450 585.157 62
 0 10 7 9194.32 547.731 72
 0 10 7 8831.57 565.25 27
 0 -10 -7 9984.36 590.023 31
 0 10 -7 11493.3 625.914 15
 0 -10 7 9851.83 593.15 48
 0 10 7 11194.3 610.565 14
 0 10 7 11155.9 621.922 15
 0 10 -7 11380.6 630.393 16
 0 10 -7 10834.2 577.331 32
 0 -10 7 10806.5 590.796 43
 0 -10 7 10384.5 597.284 24
 0 -10 -7 9882.06 592.173 49
 0 -10 -7 10090 598.355 68
 0 -10 7 10904.8 578.963 49
 0 -10 7 11260.6 601.888 58
 0 10 -7 10280.9 554.493 54
 0 -10 7 10140 595.577 45
 0 10 -8 74569.3 3333.38 16
 0 10 8 78712.4 3335.9 32
 0 10 -8 66441.7 3245.97 54
 0 -10 -8 77649.5 3329.75 59
 0 10 -8 73418.4 3291.83 47
 0 10 8 73528.8 3244.13 53
 0 -10 8 74509.9 3292.93 43
 0 -10 8 68401.7 3295.45 70
 0 -10 8 72276.6 3306.61 52
 0 -10 8 73885.4 3308.63 48
 0 -10 8 72214.6 3300.2 45
 0 -10 -8 73860.3 3297.3 20
 0 -10 8 72518.2 3304.62 24
 0 10 8 62270.9 3264.58 27
 0 -10 8 74245.3 3280.71 49
 0 -10 -8 72289 3301.45 49
 0 10 8 71207.4 3306.41 14
 0 10 -8 75901.2 3329.74 15
 0 -10 8 75838.4 3305.5 58
 0 -10 -8 71999 3332.17 66
 0 10 8 73802.1 3323.64 15
 0 10 -8 72736.7 3276.73 32
 0 10 -8 71449.2 3292.58 62
 0 10 -9 622.838 132.861 62
 0 -10 9 705.938 160.528 58
 0 10 9 525.826 137.076 53
 0 10 9 340.162 140.891 14
 0 -10 9 411.738 151.113 70
 0 -10 9 657.011 165.456 43
 0 -10 9 503.858 119.318 49
 0 -10 9 275.528 122.574 56
 0 10 -9 520.697 125.304 32
 0 -10 9 594.597 182.545 48
 0 10 9 1004.74 222.815 32
 0 10 9 682.356 207.67 47
 0 -10 -9 468.727 151.871 59
 0 -10 9 786.548 171.721 24
 0 -10 -9 751.72 150.513 20
 0 10 -9 622.308 169.879 15
 0 -10 9 534.587 178.54 52
 0 -10 9 743.562 183.074 45
 0 10 9 825.409 183.132 15
 0 -10 -9 623.243 156.945 66
 0 -10 -9 763.411 143.806 38
 0 10 -9 617.504 143.248 47
 0 10 9 629.5 175.672 27
 0 10 10 168.455 138.446 15
 0 -10 10 208.285 139.053 24
 0 -10 10 319.405 103.423 49
 0 10 10 48.0668 105.716 53
 0 10 -10 125.54 142.181 15
 0 -10 10 251.189 119.533 58
 0 -10 10 183.421 124.199 45
 0 -10 10 157.823 116.533 43
 0 -10 -10 132.25 134.659 66
 0 -10 -10 40.6278 107.756 67
 0 10 10 191.232 163.223 27
 0 -10 10 223.52 128.911 70
 0 -10 -10 176.286 110.04 20
 0 -10 -10 160.697 103.661 38
 0 -10 -10 211.683 120.751 59
 0 -10 10 192.649 147.166 52
 0 10 -10 149.95 112.863 47
 0 -10 10 219.181 119.702 56
 0 10 10 201.289 162.839 47
 0 10 10 86.8932 112.67 14
 0 10 -10 255.13 103.449 62
 0 10 -10 228.407 100.686 32
 0 10 11 297.512 189.631 47
 0 -10 -11 81.7177 127.669 68
 0 -10 -11 -29.6091 132.339 31
 0 -10 -11 38.8497 107.425 20
 0 -10 11 -20.5955 129.915 24
 0 10 11 25.2311 112.807 53
 0 10 11 86.8738 160.626 27
 0 -10 11 49.4644 140.565 52
 0 10 -11 21.4886 129.121 15
 0 10 -11 -14.7727 86.4895 32
 0 -10 11 100.115 114.295 58
 0 -10 -11 -31.6802 116.796 67
 0 -10 11 86.1287 84.4948 49
 0 10 11 109.077 156.108 15
 0 10 -11 42.1016 102.23 47
 0 -10 11 -60.6763 112.522 70
 0 -10 -11 91.6976 113.366 59
 0 -10 11 -18.4438 115.807 56
 0 -10 -11 158.578 134.023 66
 0 -10 11 117.21 122.808 43
 0 10 11 39.5359 107.997 14
 0 -10 11 224.996 142.141 45
 0 -10 -11 103.189 108.642 38
 0 10 -11 104.246 97.6314 62
 0 -10 12 387.98 139.429 70
 0 10 12 528.687 149.226 53
 0 -10 12 640.235 176.597 45
 0 -10 12 638.492 148.909 43
 0 10 -12 523.674 135.427 62
 0 -10 -12 664.803 163.408 66
 0 -10 12 760.492 189.187 52
 0 -10 -12 592.755 154.048 31
 0 -10 -12 674.594 183.165 68
 0 10 12 871.494 198.812 15
 0 -10 -12 529.013 154.356 20
 0 -10 12 594.065 179.173 24
 0 -10 -12 630.994 160.792 38
 0 -10 -12 472.347 159.247 67
 0 -10 12 679.583 169.815 56
 0 10 -12 552.054 136.415 47
 0 10 12 687.035 201.246 27
 0 -10 -12 536.403 153.929 59
 0 -10 12 625.649 151.158 58
 0 10 -12 551.986 171.923 15
 0 -10 12 542.814 119.752 49
 0 -10 -13 30680.1 1505.46 20
 0 -10 13 30023.8 1506.42 70
 0 -10 13 31660 1498.44 45
 0 10 13 29216.5 1443.29 53
 0 -10 13 32550.1 1492.06 58
 0 -10 13 29464.8 1440.26 49
 0 -10 -13 29496.4 1497.03 59
 0 10 13 25914.8 1516.44 32
 0 -10 -13 31697.6 1508.19 38
 0 10 -13 29626.6 1487.49 61
 0 -10 13 31756.8 1516.96 48
 0 10 -13 31686.3 1525.79 15
 0 10 13 31880.9 1516.43 35
 0 -10 13 26770.4 1480.73 56
 0 -10 -13 32296.5 1538.91 66
 0 -10 13 31142.9 1521.49 24
 0 10 -13 29191.8 1464.58 47
 0 -10 13 32040 1477.88 43
 0 -10 13 30938.4 1505.75 52
 0 10 13 31506.4 1531.87 15
 0 -10 -13 32739.7 1529.61 67
 0 10 13 30999.4 1497.01 27
 0 10 -13 30515.4 1497.85 62
 0 -10 -14 12157 694.987 20
 0 10 14 11314.6 641.999 53
 0 -10 14 11666.7 697.931 70
 0 -10 -14 12651.3 725.321 66
 0 -10 14 10899.3 678.031 56
 0 10 14 12522.6 701.155 27
 0 -10 14 11964.9 655.659 43
 0 10 -14 11603.4 683.724 62
 0 -10 14 12358.2 708.922 48
 0 -10 14 12274.2 699.253 52
 0 10 14 12164 719.023 15
 0 -10 -14 12437.1 696.105 38
 0 -10 14 11968.6 681.261 45
 0 -10 14 12019.8 670.34 58
 0 10 -14 12286.2 713.184 15
 0 10 -14 11210.7 674.19 61
 0 -10 14 12947.4 724.925 24
 0 10 14 12317.8 700.761 35
 0 10 14 11026.4 730.589 32
 0 -10 -14 12622.3 713.523 67
 0 -10 -14 12011.2 689.492 59
 0 10 -14 11169.7 651.069 47
 0 -10 15 469.939 162.594 52
 0 10 15 337.073 198.298 41
 0 -10 -15 298.423 124.295 59
 0 -10 15 294.876 139.411 45
 0 -10 -15 466.045 156.123 67
 0 -10 15 359.141 163.575 56
 0 -10 15 477.124 127.95 43
 0 -10 -15 292.487 143.975 38
 0 10 15 296.803 232.63 32
 0 10 -15 403.144 169.106 15
 0 10 -15 279.061 106.713 47
 0 -10 15 271.079 182.55 24
 0 10 15 141.091 203.759 27
 0 10 15 410.134 178.469 15
 0 -10 15 460.85 169.142 70
 0 -10 -15 330.853 163.403 66
 0 10 -15 316.167 127.228 62
 0 10 15 465.708 157.894 35
 0 -10 -15 297.974 165.843 20
 0 10 -15 346.131 114.664 61
 0 -10 15 257.116 124 58
 0 -10 15 271.834 167.341 48
 0 -10 16 16967 884.701 58
 0 10 -16 16525.8 929.376 15
 0 10 16 13974.6 923.396 41
 0 10 -16 17440.6 922.523 61
 0 -10 16 17130.5 932.941 48
 0 -10 -16 17090.4 902.988 39
 0 -10 -16 16234.3 925.177 20
 0 -10 -16 17405.3 944.513 67
 0 10 16 16642.8 942.454 15
 0 -10 -16 17526.4 929.799 38
 0 -10 16 18152.5 962.474 24
 0 -10 16 16357 866.477 43
 0 10 16 17169.6 924.808 35
 0 10 -16 16972.7 926.556 62
 0 -10 16 18934.3 930.194 52
 0 -10 -16 17132.7 911.216 59
 0 -10 16 16452 932.269 70
 0 10 16 15941.5 963.28 32
 0 10 16 17090.3 925.246 27
 0 -10 16 16075.4 920.44 56
 0 -10 -16 18154.9 956.417 66
 0 -10 16 17447.8 905.87 45
 0 -10 -17 129.857 137.539 67
 0 -10 17 69.5831 172.505 48
 0 10 17 203.51 138.728 35
 0 -10 17 12.6451 151.283 70
 0 -10 17 202.794 101.708 58
 0 10 17 222.957 227.631 32
 0 10 17 63.7034 213.012 27
 0 10 17 134.186 169.368 41
 0 -10 -17 147.589 120.865 39
 0 10 -17 58.0605 96.8152 61
 0 -10 17 21.4178 132.055 52
 0 -10 17 267.017 179.321 56
 0 -10 17 155.087 118.391 45
 0 -10 -17 276.255 153.715 38
 0 10 -17 97.236 151.292 15
 0 -10 17 275.415 202.701 24
 0 -10 -17 169.591 107.808 59
 0 10 17 38.3327 154.431 15
 0 -10 -17 293.251 162.71 66
 0 10 -17 61.3867 119.368 62
 0 -10 17 164.612 98.1421 43
 0 10 -18 10656.4 672.822 15
 0 -10 -18 12150 707.508 61
 0 -10 -18 11885.7 710.339 66
 0 -10 18 12118.6 725.281 24
 0 10 -18 10622.5 675.585 62
 0 10 18 11683.5 707.81 41
 0 -10 -18 10938.6 681.89 38
 0 -10 -18 11947.1 686.185 55
 0 -10 18 11292.5 626.988 58
 0 -10 18 11158 660.222 52
 0 -10 -18 11054.6 690.105 67
 0 10 -18 11592 677.537 61
 0 -10 18 10609.5 686.68 56
 0 -10 -18 11404.9 662.833 39
 0 10 18 10357.3 649.963 35
 0 -10 18 10642.7 685.881 70
 0 10 18 12341.3 746.114 32
 0 10 18 10369.9 675.724 15
 0 -10 18 11585.8 645.815 45
 0 -10 18 11401.4 683.453 48
 0 10 -19 1356.82 208.406 62
 0 -10 19 1582.14 281.505 24
 0 10 -19 1200.87 188.314 61
 0 -10 -19 1288.96 191.61 39
 0 10 19 1641.69 303.667 32
 0 -10 19 1666.02 256.451 56
 0 -10 -19 1510.13 232.352 66
 0 10 19 1448.1 231.711 15
 0 10 -19 1242 216.989 15
 0 10 19 1599.94 244.558 41
 0 -10 19 1534.71 208.75 52
 0 -10 19 1607.78 250.198 70
 0 -10 19 1565.4 198.325 45
 0 -10 -19 1638.17 246.56 61
 0 -10 19 1734.96 239.632 48
 0 -10 -19 924.414 203.195 38
 0 -10 -19 1267.2 196.478 55
 0 -10 -20 7019.39 507.448 61
 0 -10 -20 6500.3 460.259 39
 0 10 20 6546.73 524.51 32
 0 -10 -20 6898.74 487.301 55
 0 -10 -20 7295.62 506.947 66
 0 10 -20 6391.57 481.615 62
 0 -10 20 6871.87 457.698 52
 0 10 -20 6712.05 473.246 61
 0 -10 20 7110.35 530.911 24
 0 -10 20 6708.38 503.205 70
 0 10 20 7864.07 507.175 41
 0 10 -20 7248.2 494.178 15
 0 -10 20 6753.9 438.436 45
 0 -10 20 6865.15 482.526 48
 0 -10 20 6823.83 506.451 56
 0 10 -21 2370.39 279.333 62
 0 -10 -21 2710.08 297.285 66
 0 -10 21 2878.65 313.884 70
 0 -10 21 2716.75 240.789 45
 0 10 -21 2918.99 288.654 15
 0 -10 21 3211.32 326.898 56
 0 -10 -21 2795.8 268.935 39
 0 -10 21 2619.49 343.847 24
 0 -10 21 2577.3 284.952 48
 0 10 21 2721.1 284.527 41
 0 10 -21 2360.34 261.725 61
 0 10 21 2676.65 317.542 32
 0 -10 -21 2830.12 308.7 61
 0 -10 -21 2965.03 288.221 55
 0 -10 21 2721.11 259.044 52
 0 -10 -22 3076.54 291.765 39
 0 -10 -22 3506.82 327.032 66
 0 -10 22 3269.13 308.16 48
 0 -10 -22 3690.04 324.419 55
 0 -10 22 3628.8 346.654 70
 0 10 22 3419.33 300.693 41
 0 10 -22 2886.54 282.394 61
 0 -10 22 3368.58 340.541 56
 0 -10 -22 3704.16 338.625 61
 0 -10 22 3479.89 281.732 52
 0 -10 22 3349.7 262.119 45
 0 10 -22 3034.19 312.91 62
 0 10 -22 3092.02 294.865 15
 0 10 22 3534.86 352.476 32
 0 10 23 478.1 138.566 41
 0 10 -23 441.251 146.165 15
 0 -10 23 380.014 150.85 48
 0 -10 -23 295.453 153.978 66
 0 -10 23 374.589 126.763 52
 0 -10 -23 226.484 122.487 39
 0 10 23 469.32 209.699 73
 0 10 -23 321.838 153.964 62
 0 10 23 470.841 199.051 32
 0 -10 -23 393.931 160.213 61
 0 10 -23 455.224 126.754 61
 0 -10 23 185.125 186.611 56
 0 -10 -23 276.215 133 55
 0 -10 23 647.873 192.669 70
 0 -10 -24 3758.32 306.892 39
 0 -10 24 4174.04 356.455 70
 0 -10 24 3664.26 312.599 48
 0 10 -24 3522.75 297.244 61
 0 -10 -24 3750.87 294.349 19
 0 -10 -24 3901.28 328.321 66
 0 -10 -24 3983.16 330.318 55
 0 10 24 3689.12 354.128 73
 0 -10 24 3572.8 273.868 52
 0 10 -24 3055.96 284.395 15
 0 10 24 3597.4 335.482 32
 0 -10 24 4029.05 353.908 56
 0 10 -24 3288.3 319.231 62
 0 -10 -24 3833.06 342.009 61
 0 -10 25 168.562 128.137 48
 0 -10 -25 137.694 121.861 66
 0 10 -25 176.725 98.4871 61
 0 -10 25 316.616 190.053 56
 0 -10 -25 278.711 148.291 61
 0 -10 -25 529.879 133.986 18
 0 10 25 426.117 189.037 73
 0 -10 25 118.304 154.443 70
 0 -10 -25 275.292 104.063 19
 0 -10 -25 352.448 132.871 55
 0 10 -25 350.124 137.852 62
 0 10 25 338.827 166.649 32
 0 10 -25 281.07 113.396 15
 0 -10 -26 608.661 150.167 55
 0 -10 26 512.535 139.537 48
 0 10 26 441.212 156.335 32
 0 10 26 705.276 187.961 73
 0 -10 26 414.707 176.805 56
 0 -10 26 696.181 208.655 24
 0 10 -26 411.243 134.321 62
 0 -10 -26 502.19 152.578 61
 0 10 -26 453.588 111.796 15
 0 -10 -26 492.656 128.231 66
 0 -10 26 496.242 171.657 70
 0 -10 -26 458.719 123.463 18
 0 -10 -26 401.429 105.254 19
 0 -10 27 378.192 174.084 24
 0 -10 27 457.904 118 48
 0 -10 27 334.922 152.121 70
 0 10 -27 374.061 118.029 62
 0 10 27 216.249 136.112 32
 0 10 27 282.372 150.413 73
 0 -10 -27 411.98 141.84 61
 0 -10 -27 506.527 113.628 66
 0 -10 -27 206.376 91.6327 18
 0 10 -28 18.4896 112.229 16
 0 10 -28 140.154 104.734 62
 0 -10 -28 9.63329 101.954 61
 0 10 28 -47.1725 125.98 73
 0 -10 28 6.21243 78.7505 48
 0 -10 28 73.16 120.081 70
 0 -10 28 210.767 153.841 24
 0 10 28 15.7501 102.968 32
 0 -10 -28 75.1701 75.8157 18
 0 10 -29 250.801 106.718 16
 0 -10 -29 182.673 75.2314 18
 0 10 29 157.784 112.264 73
 0 10 29 237.468 101.799 32
 0 -10 29 440.89 141.933 24
 0 10 -29 197.419 94.9999 62
 0 -10 29 347.083 129.645 70
 0 -10 -29 275.458 113.485 61
 0 -10 30 292.085 105.256 70
 0 -10 30 91.797 93.2897 29
 0 10 -30 137.458 93.0813 16
 0 10 30 144.002 81.2361 50
 0 -10 -30 179.866 93.3981 61
 0 10 30 112.189 71.6257 32
 0 10 30 218.891 103.725 73
 0 -10 30 255.768 120.932 24
 0 10 -30 19.0471 66.554 62
 0 10 31 2852.29 203.105 50
 0 -10 31 2605.77 199.781 29
 0 10 -31 2899.67 210.078 16
 0 10 -31 2826.34 198.147 62
 0 -10 -31 2974.77 218.433 61
 0 -10 31 3191.55 232.339 24
 0 10 31 2926 211.782 73
 0 -10 31 2810.16 212.435 70
 0 -10 -32 1663.1 140.712 61
 0 -10 32 1526.44 143.228 24
 0 -11 0 8.75745 113.494 48
 0 11 0 -41.0436 112.781 69
 0 11 0 8.61084 126.289 32
 0 11 0 116.493 110.536 75
 0 -11 0 8.54258 92.1615 29
 0 11 0 54.8466 134.065 47
 0 -11 0 25.9878 109.775 49
 0 -11 0 -8.41987 99.6122 68
 0 11 0 -41.7242 127.242 15
 0 11 0 32.9971 99.7281 30
 0 -11 0 10.904 108.335 66
 0 -11 0 8.00203 93.1625 31
 0 11 0 10.5254 114.268 16
 0 11 -1 312.755 134.449 32
 0 -11 -1 432.88 121.816 31
 0 11 -1 510.57 118.633 30
 0 -11 -1 356.937 146.256 43
 0 11 1 375.827 155.936 15
 0 -11 1 463.456 122.158 68
 0 -11 -1 503.268 135.253 48
 0 11 -1 425.032 144.895 47
 0 -11 1 393.205 138.199 48
 0 11 1 465.672 157.981 32
 0 11 1 607.889 135.897 30
 0 11 -1 403.536 125.151 75
 0 -11 -1 635.738 154.13 66
 0 11 1 425.277 130.991 69
 0 11 -1 395.452 133.353 69
 0 11 1 352.263 156.758 47
 0 -11 -1 549.834 127.118 68
 0 -11 1 455.664 118.838 31
 0 11 1 365.855 116.338 27
 0 -11 1 416.225 150.25 45
 0 11 1 427.528 145.66 16
 0 11 -1 446.648 140.425 16
 0 -11 1 575.066 135.277 49
 0 -11 -1 666.334 154.384 49
 0 -11 2 8199.56 495.751 24
 0 -11 2 8259.12 522.651 58
 0 -11 -2 9321.96 552.936 66
 0 11 -2 8554.96 529.803 75
 0 -11 -2 8082.63 511.104 49
 0 11 -2 9449.08 520.599 32
 0 -11 -2 8686.63 510.078 31
 0 -11 2 8774.54 506.226 68
 0 11 2 8521.61 491.61 30
 0 -11 2 7390.78 506.183 43
 0 -11 2 8526.91 529.117 52
 0 -11 -2 9154.09 523.609 43
 0 11 2 8717.16 545.212 15
 0 -11 -2 8606.59 511.856 68
 0 11 -2 7227.97 463.404 44
 0 11 -2 9455.23 554.4 16
 0 11 2 8882.72 534.001 47
 0 11 -2 9134.81 527.83 47
 0 -11 -2 8931 532.441 58
 0 11 2 7606.44 476.575 27
 0 11 -2 7736.73 471.048 30
 0 -11 2 8572.41 520.555 48
 0 11 2 8887.63 534.591 69
 0 -11 2 9033.33 505.13 31
 0 -11 2 8846.58 528.286 45
 0 -11 2 8992.07 519.257 49
 0 11 2 9742.83 538.311 32
 0 11 -3 5636.73 396.059 16
 0 -11 -3 5595.43 367.477 31
 0 11 3 5195.02 373.348 69
 0 11 3 4571.95 334.285 27
 0 11 3 4893.64 386.737 15
 0 -11 -3 5523.03 400.639 66
 0 -11 3 5458.28 347.533 31
 0 -11 3 4978.43 350.805 24
 0 -11 3 5232.57 369.181 48
 0 11 -3 4956.72 324.043 30
 0 -11 -3 5449.08 371.947 68
 0 11 -3 4702.22 321.071 44
 0 -11 3 5671.93 385.1 58
 0 11 3 5416.04 381.058 32
 0 -11 3 4674.18 361.15 43
 0 11 -3 5323.03 371.558 47
 0 -11 3 5059.78 383.899 52
 0 11 3 5272.08 385.215 47
 0 -11 -3 5413.05 383.647 58
 0 11 -3 5116.53 375.188 75
 0 -11 3 5071.97 357.755 49
 0 11 -3 5507.18 362.258 32
 0 -11 -4 14933.9 818.926 66
 0 -11 -4 14088.7 785.205 68
 0 -11 -4 14304.7 779.653 31
 0 11 -4 12448.2 722.671 44
 0 -11 4 14169.7 788.378 58
 0 11 -4 15049.2 772.914 32
 0 11 -4 15107.3 787.544 47
 0 11 4 14264.2 791.891 69
 0 11 -4 15686.7 812.652 75
 0 -11 4 15379.9 764.742 31
 0 11 4 15126.5 800.134 32
 0 11 4 16729.9 819.539 47
 0 -11 4 13983.7 771.817 24
 0 -11 4 15190.5 795.554 48
 0 -11 4 15498.2 782.609 49
 0 11 -4 15662.6 823.872 16
 0 11 4 12925.9 743.583 27
 0 11 4 14711.4 810.431 15
 0 -11 4 14807 785.534 43
 0 11 -5 8630.35 549.625 44
 0 11 5 11607.4 642.495 14
 0 -11 5 10622.3 616.12 24
 0 11 5 9459.05 560.027 72
 0 -11 -5 10814.3 617.614 31
 0 -11 5 11214.5 623.97 43
 0 11 -5 11513.3 591.074 54
 0 11 5 11783.2 656.97 15
 0 11 -5 11598 610.379 32
 0 11 5 10801.4 625.92 69
 0 -11 5 11342 637.23 58
 0 -11 5 11025.2 592.493 31
 0 11 -5 10989.9 640.648 75
 0 -11 -5 10506.6 623.002 68
 0 -11 -5 11168 608.181 20
 0 -11 5 11610.9 619.024 49
 0 11 -5 11662.2 654.183 15
 0 -11 5 11421.2 632.776 48
 0 11 -5 11631.9 658.434 16
 0 11 5 12281.6 654.733 32
 0 11 5 11045.5 643.057 47
 0 11 5 9605.44 587.02 27
 0 11 -5 10833.4 618.903 47
 0 11 -6 779.376 161.855 75
 0 -11 6 1013.76 188.682 45
 0 11 -6 598.972 146.966 47
 0 -11 6 729.073 170.693 43
 0 -11 6 669.708 160.113 24
 0 11 6 761.935 158.65 14
 0 -11 -6 617.046 167.248 49
 0 11 -6 907.555 185.819 15
 0 11 6 573.184 164.355 15
 0 -11 6 679.517 172.374 48
 0 11 6 670.676 162.968 27
 0 -11 6 673.17 117.175 31
 0 11 -6 702.148 162.794 16
 0 -11 -6 703.17 152.962 31
 0 11 -6 657.871 121.242 54
 0 -11 6 1004.35 155.18 49
 0 11 6 699.368 197.923 32
 0 11 -6 760.828 139.73 32
 0 -11 -6 793.31 168.549 68
 0 -11 -6 666.644 140.986 20
 0 -11 6 783.026 166.441 58
 0 -11 7 5502.42 398.343 45
 0 -11 7 5138.35 392.083 48
 0 11 7 5192.33 411.049 32
 0 -11 -7 5108.03 385.409 49
 0 -11 7 5340.61 345.654 31
 0 11 -7 5053.9 401.808 16
 0 11 -7 5580.82 347.285 54
 0 11 -7 5734.49 405.343 75
 0 11 7 5465.9 411.099 15
 0 -11 7 5562.47 392.505 58
 0 -11 -7 5611.82 369.668 38
 0 11 7 5693.56 395.626 14
 0 11 -7 5290 361.477 62
 0 -11 7 5764.8 410.72 52
 0 11 -7 5720.13 384.294 47
 0 11 -7 5616.7 367.263 32
 0 -11 -7 5588.81 379.314 20
 0 -11 7 5296.31 383.667 24
 0 11 -7 5679.29 410.588 15
 0 -11 -7 5474.2 393.058 68
 0 -11 7 5559.98 373.265 49
 0 -11 -7 5678.41 389.967 31
 0 -11 7 5622.39 388.526 43
 0 11 7 4720.6 369.384 27
 0 -11 -7 5368.05 403.992 59
 0 11 -8 2508.9 242.744 47
 0 -11 -8 2719.92 269.247 31
 0 11 8 2580.75 281.148 15
 0 -11 -8 2531.8 267.014 59
 0 -11 8 2599.11 259.604 43
 0 11 8 2701.91 261.046 14
 0 -11 -8 2495.97 271.366 68
 0 -11 8 2383.06 254.248 24
 0 -11 8 2716.03 274.433 48
 0 11 -8 2479.73 269.426 15
 0 11 8 2533.17 263.866 27
 0 -11 8 2701.21 239.414 49
 0 -11 8 2654.7 279.653 52
 0 -11 -8 2744.19 242.061 38
 0 -11 8 2853.55 221.796 31
 0 -11 8 3087.47 273.909 58
 0 11 8 3076.72 308.577 32
 0 -11 8 2786.4 277.045 45
 0 11 -8 2419.02 228.225 62
 0 -11 -8 2662.67 248.641 20
 0 11 -8 2931.44 286.061 16
 0 11 -8 2920.77 241.456 32
 0 -11 9 1968.24 252.399 52
 0 -11 -9 2331.96 229.367 38
 0 11 -9 2163.87 205.82 32
 0 11 -9 2113.33 222.197 47
 0 11 9 2040.3 281.531 32
 0 -11 -9 2389.94 258.418 66
 0 11 9 2112.96 255.167 15
 0 11 9 1899.24 228.581 14
 0 11 -9 2335.25 260.229 16
 0 -11 9 1992.27 230.231 43
 0 11 -9 1679.92 196.698 62
 0 11 9 2044.73 242.399 27
 0 11 -9 2230.33 259.438 15
 0 -11 9 2351.17 258.825 48
 0 -11 -9 2189.48 229.155 20
 0 -11 9 2299.41 259.192 45
 0 -11 -9 2384.34 252.919 59
 0 -11 9 2307.5 244.668 24
 0 -11 9 2163.09 236.746 58
 0 -11 9 2429.75 217.082 49
 0 -11 10 2668.77 280.085 52
 0 11 10 2526.26 311.241 32
 0 11 10 2404.1 278.858 15
 0 11 10 2441.56 271.605 27
 0 11 -10 2340.17 227.27 62
 0 11 -10 2513.52 281.982 16
 0 -11 -10 2417.46 261.195 59
 0 -11 10 2466.39 247.471 43
 0 -11 10 2236.96 262.081 45
 0 11 10 2428.54 252.216 14
 0 -11 -10 2768.67 249.202 38
 0 -11 10 2421.98 227.091 49
 0 11 -10 2421.69 278.33 15
 0 -11 10 2468.77 253.764 58
 0 -11 -10 2263.44 243.679 20
 0 -11 -10 2278.03 248.851 67
 0 -11 -10 2372.52 267.298 66
 0 -11 10 2314.03 260.194 24
 0 11 -10 2139.72 230.203 47
 0 11 -10 2238.7 213.856 32
 0 11 10 2508.54 213.168 53
 0 11 10 2485.43 296.361 47
 0 -11 10 2182.2 270.095 48
 0 11 11 11166.8 669.979 15
 0 11 -11 10106.9 610.744 62
 0 -11 -11 10379.6 637.08 59
 0 11 11 11150.1 638.382 14
 0 -11 -11 11386.7 655.795 67
 0 -11 11 11434.1 638.295 58
 0 -11 11 9876.29 622.308 70
 0 11 -11 9979.13 584.872 32
 0 11 11 11329.7 632.382 27
 0 -11 -11 9078.02 624.885 68
 0 -11 11 10738.8 639.102 45
 0 -11 -11 10881.3 633.425 20
 0 -11 11 10293.8 613.397 43
 0 11 11 9901.21 567.999 53
 0 11 -11 11210 657.955 15
 0 -11 11 10167.5 637.182 24
 0 -11 -11 11105.8 632.336 38
 0 -11 11 10549.6 647.846 52
 0 -11 -11 11133.1 667.983 66
 0 -11 11 11258.4 602.864 49
 0 11 11 10534.7 669.063 47
 0 11 -11 11612.7 673.041 16
 0 11 -11 10958.5 613.559 47
 0 -11 -12 5686.39 443.989 66
 0 11 12 5812.95 450.255 15
 0 -11 12 6444.87 420.061 43
 0 -11 12 6201.77 428.696 58
 0 -11 12 6362.33 451.329 52
 0 11 -12 6128.74 455.306 15
 0 -11 12 6429.82 390.893 49
 0 11 -12 6516.91 470.893 16
 0 -11 -12 6148.37 441.633 67
 0 -11 -12 6138.5 429.148 20
 0 -11 -12 5929.38 422.898 38
 0 11 12 6252.27 440.564 27
 0 -11 12 5637.29 421.578 70
 0 11 -12 5313.21 399.75 62
 0 -11 12 5862.1 443.479 24
 0 -11 -12 5318.91 416.015 59
 0 11 -12 6143.21 404.761 47
 0 11 12 5819.24 378.942 53
 0 -11 12 6321.45 435.223 45
 0 -11 -13 -34.1238 124.364 59
 0 11 -13 116.555 109.253 62
 0 -11 -13 110.433 148.279 67
 0 11 13 217.082 174.057 15
 0 -11 13 12.0709 166.488 24
 0 -11 13 151.212 86.7302 49
 0 -11 -13 273.519 159.748 66
 0 11 13 -19.828 197.429 27
 0 -11 13 180.824 139.314 70
 0 11 -13 219.765 172.262 15
 0 -11 -13 88.2585 131.305 38
 0 11 13 23.9187 143.06 35
 0 -11 13 149.984 155.584 45
 0 -11 13 79.6447 161.136 52
 0 -11 -13 137.258 133.987 20
 0 11 -13 99.3195 101.764 47
 0 -11 13 183.274 124.923 58
 0 -11 13 214.518 123.084 43
 0 11 -14 935.035 166.486 62
 0 -11 -14 1250.37 205.356 20
 0 -11 14 1168.24 200.775 45
 0 11 -14 924.637 158.464 47
 0 -11 -14 1236.56 212.901 67
 0 11 14 1496.46 294.262 41
 0 -11 14 1142.37 203.073 70
 0 11 14 1201.88 244.683 27
 0 -11 14 1028.57 168.807 43
 0 -11 14 894.985 210.472 52
 0 -11 -14 1104.33 186.721 59
 0 11 14 1199.94 231.905 15
 0 -11 -14 1167.64 210.764 66
 0 -11 14 1188.65 187.859 58
 0 11 -14 1276.07 221.834 15
 0 -11 14 1063.98 232.117 24
 0 11 14 1075.51 208.037 35
 0 -11 14 1337.53 249.168 48
 0 -11 -14 1360.23 213.353 38
 0 11 15 63970.2 2938.45 35
 0 11 15 62990.2 2958.32 15
 0 -11 15 65546.8 2948.86 48
 0 -11 -15 62681.9 2895.58 39
 0 -11 15 64804 2901.62 58
 0 11 -15 58512.9 2865.68 47
 0 11 -15 64642.5 2948.7 15
 0 -11 15 65758.9 2937.47 52
 0 -11 15 65023.5 2914.79 45
 0 -11 15 62992.4 2881.58 43
 0 -11 15 59898.4 2922.93 70
 0 11 15 52374.4 2942 32
 0 -11 15 65679.2 2956.97 24
 0 -11 -15 64872.1 2936.33 38
 0 -11 -15 65892.2 2939.52 20
 0 -11 -15 63531.4 2959.02 66
 0 -11 15 58160.1 2906.97 56
 0 11 15 61183.7 2909.26 27
 0 -11 -15 63043.3 2922.53 59
 0 -11 -15 65204.4 2952.21 67
 0 11 -15 63070.2 2922.69 62
 0 -11 -16 38033.6 1835.82 39
 0 -11 16 41375.5 1844.95 58
 0 -11 16 40628.1 1903.85 24
 0 -11 -16 38115.1 1855.62 59
 0 -11 16 37944.3 1872.24 70
 0 -11 16 37526.9 1813.05 43
 0 11 16 38076.1 1853.53 27
 0 -11 16 40226.8 1871.64 52
 0 -11 -16 40255.7 1899.98 67
 0 11 16 37344 1886.18 15
 0 -11 16 40322.2 1892.2 48
 0 11 16 37399.7 1864.9 35
 0 -11 -16 39005.1 1904.86 66
 0 11 -16 38655.3 1866.96 62
 0 -11 16 33798 1843.25 56
 0 11 -16 40076 1889.36 15
 0 11 16 34024 1890.4 41
 0 -11 -16 39861.5 1876.73 38
 0 11 16 35420.5 1907.66 32
 0 -11 16 39996.8 1854.19 45
 0 -11 -16 37592.3 1879.38 20
 0 -11 -17 423.459 153.941 61
 0 -11 17 375.243 115.471 43
 0 -11 -17 343.757 159.798 38
 0 -11 -17 360.558 125.92 39
 0 11 -17 237.614 158.448 15
 0 -11 -17 372.779 130.559 59
 0 11 -17 315.517 135.013 62
 0 -11 -17 306.747 166.541 67
 0 -11 17 348.522 163.289 52
 0 -11 -17 276.107 157.892 66
 0 11 17 221.271 140.009 35
 0 -11 17 958.023 238.365 24
 0 11 17 477.892 226.176 41
 0 -11 17 357.642 206.866 48
 0 11 17 473.953 179.987 15
 0 11 17 204.107 208.745 27
 0 -11 17 228.73 166.624 56
 0 -11 17 414.342 166.214 70
 0 -11 17 112.746 142.623 45
 0 11 17 360.966 252.582 32
 0 -11 17 406.978 127.39 58
 0 -11 18 2416.28 294.002 48
 0 -11 18 2128.81 271.927 70
 0 -11 -18 2272.21 278.423 38
 0 -11 -18 2123.96 232.085 39
 0 11 18 2144.42 271.403 15
 0 11 18 2438.46 306.807 41
 0 -11 18 2382.67 247.538 45
 0 11 -18 2676.92 291.081 15
 0 -11 18 2704.33 224.193 43
 0 -11 -18 2035.33 245.163 55
 0 -11 18 2872.18 331.826 24
 0 -11 18 2400.65 263.997 52
 0 -11 -18 2723.78 291.108 67
 0 11 18 2027.48 241.836 35
 0 11 -18 2394.22 261.834 62
 0 -11 -18 2651.41 290.231 61
 0 -11 18 2470.69 227.226 58
 0 11 18 2416.52 344.792 32
 0 -11 18 1910.67 272.749 56
 0 -11 -18 3038.95 303.753 66
 0 -11 19 1813.83 193.009 58
 0 11 19 2134.72 319.404 32
 0 -11 19 1796.65 250.996 70
 0 -11 -19 1978.15 256.01 38
 0 11 19 1945.13 263.585 41
 0 -11 -19 2207.28 266.546 61
 0 -11 -19 1551.57 242.686 67
 0 11 19 1722.08 241.247 15
 0 11 -19 1708.91 241.104 15
 0 -11 19 2106.53 244.674 52
 0 -11 -19 2286.89 276.775 66
 0 11 -19 1608.81 224.122 62
 0 -11 19 2064.37 221 45
 0 -11 -19 2175.86 239.095 55
 0 -11 19 1699.53 286.613 24
 0 -11 19 2129.66 269.465 48
 0 -11 -19 1618.51 201.899 39
 0 -11 19 1825.74 260.173 56
 0 -11 20 50.5086 129.184 52
 0 -11 20 319.715 184.016 56
 0 -11 20 23.4202 172.916 48
 0 -11 20 27.1454 198.378 24
 0 11 -20 -12.5863 120.295 62
 0 -11 -20 -35.689 117.311 55
 0 -11 -20 20.7461 99.9398 39
 0 11 -20 57.9843 143.551 15
 0 -11 20 63.9318 154.423 70
 0 -11 20 36.0507 110.487 45
 0 11 20 -24.6836 152.771 41
 0 -11 -20 80.5041 157.898 66
 0 11 20 -27.3238 225.547 32
 0 -11 -20 -39.5292 128.945 61
 0 -11 21 1056.68 179.592 52
 0 -11 -21 1107.53 187.578 55
 0 -11 21 1143.95 164.42 45
 0 -11 21 895.368 213.196 56
 0 11 -21 1218.12 202.453 62
 0 -11 -21 1267.9 217.106 61
 0 -11 -21 1273.92 171.83 39
 0 -11 21 1456.9 225.923 48
 0 11 -21 1421.78 206.1 15
 0 -11 21 1334.09 216.456 70
 0 -11 -21 1113.01 198.783 66
 0 11 21 1090.82 204.424 41
 0 11 21 1448.2 263.914 32
 0 -11 21 1313.54 258.972 24
 0 -11 22 291.604 124.862 52
 0 -11 -22 113.182 139.281 61
 0 11 -22 175.417 131.589 15
 0 -11 22 359.131 203.727 24
 0 11 22 240.28 137.379 41
 0 -11 22 146.641 163.343 70
 0 -11 -22 148.474 108.409 39
 0 -11 -22 296.015 147.649 66
 0 11 22 337.613 181.661 32
 0 11 -22 145.056 121.24 62
 0 -11 -22 33.8918 105.614 55
 0 -11 22 129.952 153.486 48
 0 -11 -23 5646.1 407.165 66
 0 11 23 5041.54 360.591 41
 0 -11 23 5200.96 386.245 48
 0 -11 -23 4718.26 373.594 55
 0 -11 23 5237.03 398.533 70
 0 -11 23 5101.31 346.82 52
 0 11 -23 4956.3 387.8 62
 0 -11 23 5271.95 430.935 24
 0 -11 -23 5182.11 397.31 61
 0 -11 -23 4799.31 356.991 39
 0 11 -23 5287.58 371.143 15
 0 11 23 5481.02 440.699 73
 0 11 23 4921.18 406.061 32
 0 11 -24 86.6964 107.755 62
 0 11 24 167.768 186.886 73
 0 -11 24 209.8 138.485 48
 0 11 -24 24.1234 149.364 16
 0 -11 24 121.072 144.569 70
 0 -11 -24 102.953 124.263 61
 0 -11 -24 148.283 122.039 66
 0 11 24 32.8371 153.853 32
 0 -11 -24 122.683 110.38 55
 0 11 -24 34.0838 99.8339 15
 0 -11 -25 1044.32 165.962 66
 0 11 -25 924.181 195.527 16
 0 -11 -25 855.899 151.993 55
 0 11 -25 736.096 130.665 15
 0 -11 25 887.249 165.127 48
 0 11 -25 1035.39 168.045 62
 0 -11 -25 799 139.506 18
 0 11 25 841.911 178.483 32
 0 -11 -25 910.539 173.458 61
 0 -11 25 1205.73 193.676 70
 0 11 25 851.147 189.436 73
 0 11 -26 1072.39 182.177 16
 0 -11 -26 958.684 161.651 61
 0 -11 -26 838.751 138.763 66
 0 11 -26 813.172 143.46 62
 0 -11 26 789.87 159.898 70
 0 11 26 1017.63 174.12 32
 0 11 26 1090.89 198.987 73
 0 -11 26 928.449 150.336 48
 0 -11 -26 802.915 127.65 18
 0 11 -27 62.5476 85.4191 62
 0 11 27 18.6144 123.758 73
 0 -11 -27 40.743 74.1914 66
 0 11 27 47.3409 114.129 32
 0 11 -27 -36.123 116.011 16
 0 -11 -27 33.4532 63.9586 18
 0 -11 -27 62.7436 99.1261 61
 0 -11 27 -8.28385 106.892 70
 0 -11 28 742.662 159.483 24
 0 11 -28 875.934 147.114 16
 0 11 28 1052.77 126.392 50
 0 11 28 666.648 124.117 32
 0 -11 28 918.412 159.858 29
 0 -11 28 887.829 139.907 70
 0 11 28 979.999 157.605 73
 0 -11 -28 1066.69 145.454 61
 0 11 -28 785.342 118.471 62
 0 -11 -29 391.883 96.4183 61
 0 11 -29 181.019 90.4623 16
 0 11 -29 201.169 64.1052 62
 0 -11 29 181.452 121.543 24
 0 -11 29 317.526 107.049 29
 0 11 29 197.736 104.427 73
 0 11 29 221.787 83.7029 32
 0 11 30 92.1295 76.7532 73
 0 -11 30 246.248 95.5532 24
 0 -11 -30 96.8197 64.7063 61
 0 11 -30 185.346 74.176 16
 0 -11 30 73.3405 66.2587 29
 0 -11 31 411.48 84.3093 24
 0 12 0 899.012 190.396 16
 0 12 0 1274.19 196.122 69
 0 12 0 1107.89 215.386 15
 0 -12 0 1218.27 199.25 66
 0 12 0 1126.97 197.382 47
 0 12 0 1015.35 194.913 32
 0 -12 0 1029.57 177.476 68
 0 -12 0 1238.81 174.429 31
 0 -12 0 1038.7 187.568 49
 0 12 -1 27316.1 1297.09 16
 0 -12 -1 24386 1252.44 49
 0 -12 1 27553.4 1309.63 66
 0 12 -1 24699.2 1280.93 69
 0 -12 1 23322 1247.85 48
 0 12 -1 24333.9 1256.65 47
 0 12 1 24417.6 1263.42 47
 0 12 -1 24667 1249.53 32
 0 -12 -1 26599.1 1309.18 66
 0 -12 1 25806 1255.4 29
 0 12 1 25237 1259.49 32
 0 -12 1 25142.6 1241.16 31
 0 -12 1 23690 1241.44 68
 0 12 1 25190.5 1284.56 15
 0 -12 1 24924.5 1256.72 49
 0 -12 -1 24059.9 1241.26 31
 0 -12 -1 25419.1 1254.36 68
 0 12 1 25651.2 1278.39 69
 0 12 -1 25146.4 1267.43 75
 0 12 2 12568 746.435 27
 0 -12 2 14644.1 801.863 49
 0 -12 -2 14323.6 773.314 20
 0 12 -2 14890.4 828.188 69
 0 -12 -2 15500.6 804.893 31
 0 12 2 14525.8 814.653 69
 0 -12 2 14902.8 790.043 31
 0 12 2 15125.1 827.445 47
 0 12 -2 13305.2 752.082 30
 0 -12 2 15059.1 820.643 58
 0 -12 -2 15638.3 853.683 66
 0 -12 -2 14947.3 810.449 68
 0 -12 -2 15239.2 815.294 49
 0 -12 2 13989.4 800.707 48
 0 12 2 15442.6 843.301 15
 0 12 -2 15443.8 842.103 16
 0 -12 2 15108.5 797.371 68
 0 -12 2 15042 838.696 66
 0 12 -2 13866.5 808.237 75
 0 12 -2 14733.3 808.148 47
 0 12 2 15520.1 820.72 32
 0 -12 2 16003.9 819.818 29
 0 12 -2 16440.9 813.621 32
 0 12 3 4569.5 390.38 15
 0 -12 3 4462.6 329.974 31
 0 -12 -3 4807.9 356.955 31
 0 12 3 5193.46 394.189 47
 0 -12 -3 4816.65 396.037 66
 0 -12 3 4062.74 329.938 24
 0 -12 3 4259.69 357.511 48
 0 12 3 4915.55 383.099 32
 0 -12 -3 4644.66 329.425 20
 0 12 -3 4779.71 349.704 32
 0 -12 3 4590.66 364.232 43
 0 12 3 4768.77 367.036 69
 0 12 -3 4656.19 364.851 75
 0 12 -3 4333.57 365.207 69
 0 12 -3 4920.55 371.778 47
 0 -12 3 5025.23 379.386 58
 0 -12 -3 4690.7 361.361 68
 0 -12 3 5091.39 349.604 68
 0 12 -3 4740.62 382.904 16
 0 12 3 4154.57 323.01 27
 0 -12 -3 4680.58 363.574 49
 0 -12 3 4706.17 359.117 49
 0 -12 4 448.25 169.512 43
 0 -12 4 338.988 119.668 31
 0 12 4 201.093 136.797 14
 0 12 4 154.583 169.942 47
 0 -12 4 246.598 126.146 24
 0 -12 -4 311.775 155.973 68
 0 12 -4 212.647 123.589 75
 0 12 -4 336.095 149.371 47
 0 -12 -4 325.185 163.936 66
 0 -12 4 376.206 152.675 49
 0 -12 -4 447.647 160.171 31
 0 12 4 462.562 192.708 32
 0 -12 -4 256.898 110.298 20
 0 -12 4 366.013 172.274 58
 0 12 4 117.596 113.747 69
 0 12 4 154.168 171.337 15
 0 12 -4 170.131 146.503 16
 0 -12 4 338.899 163.541 48
 0 -12 4 323.345 129.542 68
 0 12 4 254.472 143.06 27
 0 12 -4 181.254 150.895 32
 0 -12 5 47777.9 2321.17 24
 0 -12 5 50612.3 2347.39 58
 0 12 -5 49285.1 2312.68 32
 0 12 -5 49065.2 2362.87 15
 0 12 -5 51574 2378.07 16
 0 -12 5 48524.3 2338.79 48
 0 -12 -5 52436.9 2349.82 68
 0 -12 5 49779.3 2314.12 68
 0 -12 5 49387.4 2336.39 43
 0 12 5 50072.5 2364.64 15
 0 12 5 48632.3 2354.16 47
 0 12 -5 50572.7 2334.53 47
 0 -12 -5 49835.9 2333.51 31
 0 -12 -5 46539.7 2361.98 66
 0 -12 5 49781.5 2326.58 49
 0 12 5 45819.8 2290.62 27
 0 12 5 55209 2371.33 32
 0 12 -5 49685.9 2352.11 75
 0 -12 -5 49258.7 2316.59 20
 0 -12 -5 49419.6 2304.61 38
 0 12 5 51368.4 2352.65 14
 0 -12 5 50277.1 2304.98 31
 0 12 6 4196.2 328.838 27
 0 -12 6 4629.09 339.657 49
 0 -12 -6 4106.86 352.003 49
 0 -12 6 4151.37 315.365 68
 0 -12 6 4268.06 349.269 43
 0 12 -6 4084.99 343.806 75
 0 -12 -6 4380.21 320.414 38
 0 -12 6 4069.82 345.285 58
 0 -12 6 4543.31 344.994 24
 0 12 -6 4525.69 370.249 15
 0 12 -6 4463.42 374.172 16
 0 12 -6 4561.37 324.805 32
 0 -12 -6 4247.82 323.308 20
 0 12 6 4202.66 376.278 47
 0 -12 6 3858.09 345.74 48
 0 -12 -6 3836.44 341.265 68
 0 12 6 4015.04 337.03 14
 0 12 6 3892.09 362.629 15
 0 12 -6 4372.05 339.609 47
 0 12 6 4349.42 375.552 32
 0 -12 6 3968.93 298.729 31
 0 -12 6 4314.4 358.861 45
 0 -12 -6 3773.72 352.577 59
 0 -12 -6 4351.79 345.813 31
 0 -12 -7 419.019 161.269 59
 0 12 -7 258.834 137.232 75
 0 -12 7 418.804 192.567 52
 0 -12 7 303.658 163.512 48
 0 12 7 320.969 208.759 32
 0 -12 7 394.213 167.89 58
 0 -12 -7 247.205 118.152 20
 0 -12 7 402.327 115.021 68
 0 -12 -7 378.061 110.909 38
 0 12 -7 326.222 158.403 16
 0 12 7 353.208 160.507 14
 0 -12 -7 312.702 156.84 31
 0 -12 7 363.839 162.434 43
 0 -12 7 357.337 145.276 24
 0 12 7 386.52 153.412 27
 0 -12 7 340.201 168.779 45
 0 12 7 367.45 182.833 15
 0 -12 -7 403.265 163.999 68
 0 12 -7 467.699 191.065 15
 0 12 -7 235.385 136.741 47
 0 12 -7 421.038 135.691 32
 0 -12 7 809.313 130.776 31
 0 -12 7 427.292 131.445 49
 0 12 8 12225.2 725.131 15
 0 -12 -8 11715 668.574 38
 0 -12 8 11968 688.809 43
 0 -12 8 11905 649.007 68
 0 -12 8 12055 701.993 45
 0 12 -8 12098.7 657.748 32
 0 12 -8 12166.6 718.284 16
 0 12 -8 12045.7 716.348 15
 0 12 8 11411.3 684.995 14
 0 -12 8 11865.7 695.151 58
 0 -12 -8 11906.4 682.023 20
 0 -12 8 11373.3 632.916 31
 0 -12 -8 12586.3 713.652 59
 0 -12 8 10572.7 672.31 24
 0 12 8 12309.6 730.157 32
 0 -12 -8 12967.3 710.18 31
 0 12 -8 11763.7 674.096 47
 0 -12 8 10970.2 693.48 48
 0 -12 8 11258.7 698.773 52
 0 -12 8 12228.6 669.85 49
 0 12 8 11414.2 665.833 27
 0 -12 -8 11453.2 698.242 68
 0 12 -8 12097.4 706.821 75
 0 -12 9 1295.35 219.742 45
 0 -12 9 1182.98 172.799 49
 0 12 -9 1090.6 207.755 15
 0 -12 9 1199.08 221.361 52
 0 -12 9 1459.39 165.452 68
 0 12 -9 1101.83 165.851 32
 0 -12 -9 1215.43 210.773 59
 0 12 9 978.41 207.564 27
 0 -12 9 1230.91 197.263 58
 0 -12 -9 957.721 212.193 66
 0 12 9 1353.9 238.599 15
 0 -12 9 1436.74 211.881 24
 0 -12 -9 1041.68 183.409 20
 0 -12 9 1226.12 197.285 43
 0 12 -9 1316.5 191.269 47
 0 12 -9 876.583 185.318 75
 0 -12 -9 986.654 193.761 31
 0 12 9 995.684 182.077 14
 0 -12 -9 1598.1 198.551 38
 0 -12 -9 1225.68 192.892 67
 0 12 -9 1290.75 219.845 16
 0 -12 9 1000.14 215.238 48
 0 12 9 1543.84 279.259 32
 0 -12 -10 14905.9 816.801 59
 0 -12 10 13443.7 790.59 24
 0 -12 -10 14256.3 781.213 38
 0 12 -10 13460.9 744.218 32
 0 12 -10 13707.1 767.095 47
 0 12 -10 14269 822.119 16
 0 12 10 11576.7 809.905 47
 0 12 10 13363.7 815.784 15
 0 -12 -10 14458.4 791.745 20
 0 -12 -10 14540.2 832.053 66
 0 12 -10 13838.9 801.383 75
 0 12 10 14573.8 795.166 14
 0 12 10 13994.8 775.969 27
 0 -12 10 13996 756.146 49
 0 12 -10 12951 750.85 62
 0 -12 10 14154.7 803.876 45
 0 12 10 14258.6 841.93 32
 0 -12 10 14865.9 793.093 43
 0 12 -10 15088.9 827.231 15
 0 -12 10 13747.6 805.573 48
 0 -12 10 14463.1 815.955 52
 0 -12 -10 14774.7 809.687 67
 0 -12 10 14545.4 798.884 58
 0 -12 11 25045.8 1212.61 49
 0 -12 11 23937.6 1256.09 24
 0 12 -11 24725.4 1290.4 16
 0 12 -11 23802.7 1221.04 47
 0 -12 -11 24452.3 1263.68 59
 0 -12 -11 24620.8 1250.4 20
 0 -12 11 26691.5 1265.95 58
 0 -12 11 25198.5 1263.81 45
 0 12 -11 25723.8 1284.83 15
 0 12 11 24634.2 1306.65 32
 0 12 -11 22111.1 1190.8 32
 0 12 11 24946.4 1291.69 15
 0 12 11 23814.4 1233.66 27
 0 -12 11 22281 1256.1 48
 0 -12 -11 25016.7 1246.25 38
 0 12 -11 23515.9 1261.15 75
 0 -12 11 26202.9 1250.47 43
 0 -12 -11 25982.4 1273.68 67
 0 -12 -11 25788.7 1293.2 66
 0 12 -11 23917.5 1221.35 62
 0 -12 11 23522 1262.95 52
 0 -12 12 2880.88 243.206 49
 0 -12 -12 2891.04 295.742 67
 0 -12 -12 3030.14 318.646 66
 0 -12 12 2611.84 271.979 58
 0 -12 12 2797.64 302.746 52
 0 -12 12 2737.79 299.304 24
 0 -12 12 2636.16 269.69 43
 0 12 -12 2459.85 295.53 15
 0 12 -12 2465.19 307.519 16
 0 12 -12 2607.41 254.603 47
 0 12 12 2864.64 316.201 15
 0 12 12 3112.52 310.955 35
 0 12 -12 2479.4 242.799 62
 0 -12 12 2635.15 290.67 45
 0 12 12 2576.12 284.987 27
 0 -12 -12 2661.93 274.52 59
 0 -12 -12 2715.88 273.284 38
 0 -12 -12 2473.01 270.953 20
 0 12 -13 1494.98 245.882 15
 0 -12 -13 1418.37 170.479 39
 0 -12 -13 1424.78 221.003 67
 0 -12 13 1245.57 201.161 43
 0 -12 13 1549.56 249.358 52
 0 12 13 1092.62 230.348 27
 0 12 -13 1553.97 249.317 16
 0 -12 -13 1175.85 196.926 38
 0 12 -13 1520.7 187.04 62
 0 -12 -13 1566.5 228.749 20
 0 -12 13 1282 162.88 49
 0 -12 -13 1559.93 214.685 59
 0 -12 -13 1524.64 241.838 66
 0 -12 13 1216.27 236.219 24
 0 -12 13 1216.16 199.827 58
 0 12 -13 1144.47 177.307 47
 0 12 13 1363.24 244.021 15
 0 -12 13 1181.25 222.204 45
 0 12 13 1419.81 224.869 35
 0 -12 14 3823.63 338.724 45
 0 -12 -14 3669.37 336.799 20
 0 -12 -14 3997.72 297.733 39
 0 12 14 3655.46 367.068 15
 0 -12 -14 4073.69 370.959 66
 0 12 -14 3331.17 285.053 47
 0 12 -14 4128.11 364.404 15
 0 12 14 3750.46 396.391 41
 0 -12 -14 3544.67 339.565 67
 0 -12 14 3840.38 320.168 58
 0 12 -14 3267.13 296.875 62
 0 -12 14 3689.26 307.662 43
 0 -12 14 3899.76 352.467 52
 0 -12 14 3837.24 358.262 24
 0 12 -14 4346.16 383.797 16
 0 -12 -14 3936.15 334.889 38
 0 12 14 3495.88 341.013 27
 0 -12 -14 3663.84 332.282 59
 0 12 14 4200.03 358.069 35
 0 -12 -15 3604.18 281.559 39
 0 -12 15 3519.97 359.404 48
 0 12 -15 3477.82 337.843 15
 0 12 15 3418.73 348.082 15
 0 -12 -15 3982.38 353.762 67
 0 12 15 2934.9 320.74 27
 0 12 -15 3114.84 266.667 47
 0 -12 15 3473.1 345.409 24
 0 -12 15 3617.46 322.724 45
 0 -12 -15 3486.37 331.202 20
 0 -12 15 3344.71 330.625 52
 0 12 -15 3275.86 348.914 16
 0 -12 15 3582.15 289.881 43
 0 12 15 2961.09 358.338 41
 0 -12 -15 3000.49 302.687 38
 0 12 15 3651.88 327.289 35
 0 -12 -15 3340.65 308.068 59
 0 12 -15 3069.02 289.891 62
 0 -12 15 3491.84 299.779 58
 0 -12 -15 3592.05 345.01 66
 0 -12 -16 11932 729.681 66
 0 -12 -16 11413 693.837 38
 0 12 -16 11465.7 705.808 15
 0 -12 -16 11929.9 724.046 67
 0 -12 -16 11138.6 677.543 59
 0 -12 16 11507.4 722.838 24
 0 12 16 12180.3 700.363 35
 0 -12 16 11951.8 653.841 43
 0 -12 16 11663 681.649 45
 0 12 -16 11415.9 676.11 62
 0 -12 -16 11340 651.022 39
 0 -12 16 11706.5 663.779 58
 0 -12 16 11850.2 698.244 52
 0 12 16 10446.5 731.189 41
 0 -12 16 11960.7 726.913 48
 0 12 16 10318.5 749.706 32
 0 12 16 11630.3 719.209 15
 0 -12 -16 12618.9 717.94 61
 0 12 17 13086 778.611 41
 0 12 -17 11615.9 729.338 15
 0 -12 -17 11643.4 730.184 38
 0 -12 -17 11331.3 679.091 39
 0 12 17 12858.5 794.542 32
 0 -12 -17 12587.4 749.371 67
 0 -12 17 12897.3 693.542 58
 0 12 -17 12473.3 719.481 62
 0 -12 -17 13659.5 760.485 61
 0 -12 17 12540.9 710.976 45
 0 -12 17 12017 673.866 43
 0 -12 17 12713.3 730.228 52
 0 -12 17 13516 762.916 48
 0 -12 17 12546.1 764.362 24
 0 12 17 11654.9 711.655 35
 0 -12 17 12191.5 726.856 70
 0 12 17 11656.6 741.235 15
 0 -12 -17 13439.3 729.257 55
 0 -12 -17 13023.6 766.587 66
 0 -12 18 1014.08 154.25 58
 0 -12 18 876.848 183.709 70
 0 -12 18 977.073 240.394 24
 0 12 18 1070.95 178.651 35
 0 -12 18 1140.79 178.79 45
 0 -12 -18 1036.95 200.029 38
 0 -12 -18 1086.6 213.512 66
 0 -12 -18 1076.11 157.932 39
 0 -12 18 1037.57 233.877 48
 0 12 18 1275.09 244.069 41
 0 12 18 861.581 280.207 32
 0 -12 -18 1085.26 195.871 61
 0 12 -18 1083.51 207.602 15
 0 -12 -18 1128.19 212.01 67
 0 12 -18 865.72 165.331 62
 0 12 18 919.005 193.771 15
 0 -12 -18 1344.36 189.592 55
 0 -12 18 1145.12 204.21 52
 0 12 -19 79.3669 113.488 62
 0 -12 19 -58.625 137.983 70
 0 -12 -19 -26.4711 157.406 66
 0 -12 19 -20.6853 131.067 52
 0 -12 -19 66.4849 105.049 55
 0 12 19 51.1312 188.755 41
 0 12 19 11.6162 128.456 15
 0 -12 -19 65.0275 90.2095 39
 0 12 19 -68.272 226.639 32
 0 12 -19 115.36 145.517 15
 0 -12 -19 -12.5509 117.018 61
 0 -12 19 -131.318 175.086 48
 0 -12 19 93.373 121.011 45
 0 -12 19 -26.386 188.796 24
 0 12 20 237.292 165.258 41
 0 -12 20 347.073 201.378 24
 0 12 -20 250.977 154.352 15
 0 -12 20 239.972 168.017 48
 0 -12 20 344.023 152.305 70
 0 -12 -20 236.628 117.377 55
 0 -12 -20 244.105 102.463 39
 0 12 -20 389.597 134.283 62
 0 12 20 483.769 225.311 32
 0 -12 20 213.098 140.607 52
 0 -12 -20 342.338 151.809 61
 0 -12 -20 140.051 150.303 66
 0 12 -21 822.235 168.234 15
 0 -12 -21 966.246 184.661 66
 0 12 -21 672.385 215.048 16
 0 -12 21 915.848 219.932 24
 0 12 21 843.109 185.227 41
 0 -12 -21 857.863 157.242 55
 0 -12 21 983.515 164.285 52
 0 12 21 954.558 223.348 32
 0 -12 21 811.987 195.484 48
 0 -12 -21 903.555 139.852 39
 0 -12 21 807.718 177.632 70
 0 -12 -21 1140.92 192.085 61
 0 12 -21 698.9 147.89 62
 0 -12 22 518.023 199.166 24
 0 -12 -22 238.713 92.9561 39
 0 -12 22 378.506 145.265 70
 0 -12 -22 470.875 124.2 55
 0 12 -22 449.41 183.782 16
 0 12 -22 426.551 136.47 15
 0 -12 -22 403.869 139.782 61
 0 12 -22 305.671 120.966 62
 0 -12 -22 349.34 139.735 66
 0 -12 22 427.665 158.6 48
 0 12 22 302.045 180.181 32
 0 12 22 402.69 138.622 41
 0 -12 23 971.452 210.007 24
 0 -12 -23 731.822 158.242 66
 0 12 -23 523.171 134.937 15
 0 12 23 752.523 198.534 32
 0 12 -23 710.73 177.02 16
 0 -12 -23 826.019 147.177 55
 0 12 -23 652.547 138.276 62
 0 -12 23 790.976 176.015 48
 0 -12 -23 612.76 147.158 61
 0 12 23 704.252 142.825 41
 0 12 -24 310.527 106.524 15
 0 -12 -24 147.326 102.457 66
 0 -12 24 404.22 168.229 24
 0 -12 -24 194.26 97.9217 55
 0 -12 24 334.94 133.98 48
 0 -12 -24 225.54 91.7455 18
 0 -12 -24 225.817 120.894 61
 0 12 -24 435.826 114.195 62
 0 12 -24 267.771 152.594 16
 0 12 24 214.731 151.218 32
 0 -12 25 786.908 149.59 48
 0 12 -25 910.849 173.485 16
 0 -12 -25 1204.08 166.704 61
 0 12 -25 893.886 119.871 15
 0 -12 -25 911.234 123.686 18
 0 12 25 983.152 188.006 73
 0 12 25 935.471 173.217 32
 0 -12 -25 1012.83 144.735 66
 0 -12 25 1149.16 194.295 24
 0 12 -25 982.361 135.31 62
 0 -12 26 2389.19 238.608 29
 0 -12 26 2128.23 235.295 24
 0 12 -26 2100.08 217.87 16
 0 12 26 2262.52 218.751 32
 0 12 26 2498.01 238.557 73
 0 -12 -26 2150.72 188.894 66
 0 -12 -26 2026.79 202.787 61
 0 12 -26 2055.56 179.995 62
 0 12 27 2674.66 238.327 73
 0 12 27 2485.37 215.535 32
 0 -12 27 2482.08 233.985 29
 0 -12 -27 2480.77 211.501 61
 0 12 -27 2768.42 232.283 16
 0 12 -27 2992.81 232.962 75
 0 12 -28 3713.07 266.983 16
 0 12 -28 3953.65 268.363 75
 0 12 28 3679.88 248.998 32
 0 -12 -28 3850.32 259.019 61
 0 -12 28 4551.29 291.374 29
 0 12 28 3887.39 277.584 73
 0 12 -29 2968.44 206.813 75
 0 -12 29 3605.38 225.62 29
 0 12 -29 3058.51 210.521 16
 0 12 29 2997.37 217.464 73
 0 -12 -29 2732.6 199.275 61
 0 -13 0 16.64 73.6007 20
 0 13 0 100.641 166.267 47
 0 -13 0 241.54 130.473 31
 0 13 0 25.3237 153.725 15
 0 -13 0 79.1836 161.816 66
 0 -13 0 104.977 131.848 68
 0 13 0 -21.1809 153.217 32
 0 -13 0 120.572 147.593 49
 0 13 0 190.913 147.737 69
 0 -13 -1 19256.6 1015.31 31
 0 -13 -1 18485 981.894 20
 0 -13 -1 20602 1076.28 66
 0 13 -1 18900.6 1036.82 69
 0 13 1 18870.3 1036.9 47
 0 13 -1 20085.6 1025.9 32
 0 -13 1 19311 1017.72 68
 0 -13 -1 19503.6 1032.88 49
 0 -13 1 18907.9 1006.32 29
 0 -13 1 21021.9 1069.17 66
 0 13 1 20145.4 1067.97 15
 0 13 1 20234.1 1036.47 32
 0 -13 1 19216 977.808 20
 0 13 -1 19556.9 1036.11 47
 0 -13 1 19933.4 1031.2 49
 0 13 1 19618.5 1040.93 69
 0 -13 -1 18992.6 1019.02 68
 0 -13 1 18878.5 1009 31
 0 -13 2 3949.56 359.212 58
 0 13 -2 3659.03 348.171 16
 0 -13 2 4056.15 345.559 49
 0 -13 -2 4520.64 380.17 66
 0 -13 -2 3937.73 302.513 20
 0 -13 2 3561.39 316.636 68
 0 -13 -2 4471.89 346.761 68
 0 13 -2 3735.44 341.925 47
 0 13 -2 4193.69 344.153 32
 0 -13 -2 3859.13 288.571 38
 0 -13 2 4578.94 333.917 31
 0 13 2 4006.57 337.968 69
 0 13 2 4412.74 386.731 15
 0 -13 -2 3786.42 328.372 31
 0 13 2 4244.62 369.56 47
 0 -13 -2 3781.77 340.269 49
 0 13 2 4217.15 363.062 32
 0 13 -2 3824.31 345.844 69
 0 -13 2 4428.73 365.964 66
 0 -13 2 4237.88 332.948 29
 0 -13 3 339.503 130.999 68
 0 13 3 190.885 125.168 27
 0 13 -3 199.297 145.432 69
 0 -13 3 399.216 132.506 31
 0 -13 -3 394.557 157.315 31
 0 -13 3 235.66 171.379 58
 0 13 -3 77.1126 155.603 16
 0 -13 -3 384.867 177.894 49
 0 13 3 215.841 145.234 14
 0 -13 3 258.945 143.593 66
 0 -13 -3 133.314 145.648 68
 0 13 3 218.011 186.463 15
 0 13 3 294.801 177.958 47
 0 -13 3 302.973 164.375 48
 0 -13 -3 264.99 98.0697 38
 0 -13 -3 26.9132 139.985 66
 0 -13 -3 303.627 119.745 20
 0 13 3 216.795 181.967 32
 0 -13 3 279.886 189.101 43
 0 13 -3 262.894 132.803 75
 0 -13 3 346.196 138.671 29
 0 13 -3 179.557 146.213 32
 0 13 3 261.26 128.332 69
 0 -13 3 160.814 146.482 49
 0 13 -3 377.082 160.003 47
 0 -13 -4 270.846 168.619 66
 0 13 -4 252.038 146.253 69
 0 -13 -4 511.39 157.325 31
 0 -13 4 255.355 137.083 29
 0 -13 4 365.62 167.988 48
 0 13 4 529.15 205.658 15
 0 13 4 482.618 206.37 32
 0 -13 -4 542.677 121.501 38
 0 13 -4 297.842 168.811 16
 0 13 -4 401.238 155.493 32
 0 13 4 686.366 212.586 47
 0 -13 4 592.501 180.545 66
 0 -13 4 734.984 173.939 49
 0 -13 -4 570.851 132.425 20
 0 -13 -4 362.675 158.504 68
 0 -13 4 441.679 133.38 68
 0 13 4 414.838 161.876 14
 0 -13 4 259.544 110.025 31
 0 13 -4 480.261 163.335 47
 0 -13 4 244.952 120.905 24
 0 -13 4 415.624 180.259 43
 0 13 -4 474.932 139.673 75
 0 -13 4 388.902 175.556 58
 0 13 4 531.996 146.031 27
 0 13 -5 1782.36 242.452 69
 0 -13 5 1511.58 211.742 49
 0 13 -5 1421 235.411 16
 0 -13 -5 1472.9 188.279 20
 0 13 5 1400.6 197.586 27
 0 -13 5 1756.76 239.566 66
 0 -13 5 1478.56 180.223 31
 0 -13 5 1540.34 189.424 68
 0 13 5 1558.67 254.926 15
 0 -13 5 1443.41 235.153 43
 0 -13 5 1889.08 253.184 58
 0 13 -5 1443.1 203.878 32
 0 13 5 1664.88 226.101 14
 0 13 5 1538.95 259.448 47
 0 13 -5 1502.28 214.611 47
 0 -13 5 1237.34 204.869 29
 0 -13 -5 1399.37 222.847 68
 0 -13 5 1907.47 247.668 48
 0 -13 5 1476.18 197.487 24
 0 -13 -5 1511.51 241.157 66
 0 13 -5 1161.77 192.364 75
 0 13 -5 1579.92 262.35 15
 0 -13 -5 1724.58 235.773 31
 0 -13 -5 1421.88 175.974 38
 0 13 5 1777.75 268.322 32
 0 -13 -5 1523.43 239.211 59
 0 -13 -6 1539.43 194.361 20
 0 -13 6 1408.37 228.986 58
 0 -13 6 1345.21 179.987 68
 0 -13 -6 1010.69 161.231 38
 0 13 6 1294.63 198.61 27
 0 13 -6 1174.84 204.702 47
 0 13 -6 1582.85 253.047 15
 0 -13 -6 1431.26 222.521 31
 0 -13 6 1335.27 231.305 43
 0 -13 -6 1417.71 229.059 68
 0 13 6 1550.73 266.577 32
 0 -13 6 1218.72 196.494 24
 0 -13 -6 1692.04 239.698 59
 0 13 6 1392.43 208.782 14
 0 13 6 1296.86 249.822 47
 0 13 -6 1575.5 227.097 16
 0 13 -6 1474.06 197.739 32
 0 13 6 1453.68 244.789 15
 0 -13 6 1039.71 208.385 48
 0 13 -6 1663.8 212.964 75
 0 -13 6 1192.81 197.402 49
 0 -13 6 1010.81 153.89 31
 0 -13 7 5538.38 414.038 58
 0 -13 -7 5951.56 411.117 67
 0 -13 7 5503.21 370.547 68
 0 -13 7 4931.75 399.217 43
 0 13 7 4723.73 366.739 27
 0 13 7 4915.88 422.302 15
 0 -13 -7 5104.38 381.285 20
 0 -13 7 5363.97 355.459 31
 0 -13 -7 5375.12 373.7 38
 0 -13 -7 6199.46 443.613 59
 0 -13 7 5065.72 382.464 49
 0 13 -7 4813.18 382.072 47
 0 13 -7 5367.99 423.373 16
 0 13 7 5177.41 438.462 47
 0 13 7 5414.03 402.019 14
 0 -13 -7 5612.47 422.122 68
 0 13 7 5704.11 450.529 32
 0 13 -7 4750.58 361.369 32
 0 -13 -7 5158.72 403.624 31
 0 -13 7 4896.18 385.334 24
 0 13 -7 5148.97 396.775 75
 0 -13 7 4574.28 400.151 48
 0 13 -7 5164.29 421.687 15
 0 -13 -8 2773.88 299.902 68
 0 -13 8 2834.19 309.991 48
 0 -13 -8 2396.43 277.665 67
 0 13 -8 3094.19 330.719 15
 0 13 8 3281.87 352.107 32
 0 -13 8 2800.74 298.279 58
 0 -13 -8 3186.82 277.766 20
 0 13 -8 2406.76 246.323 32
 0 -13 8 2675.54 274.759 24
 0 -13 8 3032.82 253.79 68
 0 -13 -8 3209.39 313.996 59
 0 -13 8 2299.33 281.625 43
 0 13 -8 2496 270.615 75
 0 -13 -8 2828.85 298.313 31
 0 13 -8 2612.73 304.13 16
 0 13 8 2919.25 282.843 14
 0 13 8 2769.46 272.815 27
 0 13 8 3000.47 332.222 15
 0 13 -8 2612.26 266.254 47
 0 -13 -8 2593.59 254.593 38
 0 -13 8 2914.16 267.676 49
 0 -13 9 3786.21 337.904 43
 0 13 -9 3053.76 297.325 47
 0 -13 -9 3917.69 354.119 59
 0 13 9 3810.15 383.035 32
 0 13 9 4013.86 326.912 14
 0 13 -9 3647.97 327.443 75
 0 -13 9 4037.54 367.255 45
 0 13 -9 3615.32 290.072 32
 0 -13 -9 3348.49 298.407 38
 0 13 9 3549.47 316.569 27
 0 -13 9 3400.21 314.598 24
 0 -13 9 3469.07 348.457 52
 0 -13 9 3412.76 345.998 48
 0 13 -9 3739.48 351.308 16
 0 -13 9 3619.44 280.834 68
 0 -13 9 3964.74 343.473 58
 0 -13 -9 3805.7 345.767 31
 0 -13 -9 3466 342.942 68
 0 13 -9 3464.79 347.018 15
 0 13 9 3811.21 361.379 15
 0 -13 -9 3967.78 339.141 67
 0 -13 9 3853.97 308.03 49
 0 -13 -9 3899.43 324.674 20
 0 13 -10 12699.5 736.79 15
 0 13 -10 10929.8 650.149 32
 0 -13 10 11924.6 726.433 48
 0 -13 -10 11940.7 716.208 67
 0 -13 10 12810.4 727.916 45
 0 13 10 11782.8 740.696 15
 0 -13 -10 13028.6 737.213 59
 0 -13 -10 12239.5 705.464 20
 0 13 10 11623.4 692.974 14
 0 13 -10 10953 701.928 75
 0 -13 10 11764.5 725.325 52
 0 -13 10 12009 672.899 49
 0 -13 10 12654.5 720.23 58
 0 -13 10 11243.2 696.841 24
 0 -13 10 12664.6 711.475 43
 0 13 -10 11470.7 677.063 47
 0 13 -10 12912.6 747.835 16
 0 13 10 11841 681.679 27
 0 -13 -10 11767.2 686.835 38
 0 13 10 11973.3 761.841 32
 0 -13 -10 12353.6 744.995 66
 0 13 -11 6257.05 443.142 47
 0 -13 11 6652.51 480.972 24
 0 -13 11 6828.37 507.836 48
 0 -13 11 7261.59 490.209 58
 0 -13 11 7116.96 445.037 49
 0 -13 -11 7198.18 516.843 66
 0 13 11 7474.31 528.658 15
 0 -13 11 7078.43 508.243 52
 0 -13 11 7493.79 487.114 43
 0 -13 -11 7313.83 496.584 67
 0 13 11 6908.46 506.134 35
 0 13 -11 7061.36 506.554 15
 0 13 -11 6899.53 510.445 16
 0 -13 -11 6991.23 479.83 20
 0 -13 -11 6423.24 461.683 38
 0 13 11 7010.16 471.44 27
 0 -13 -11 7148.36 499.836 59
 0 13 11 6529.97 544.6 32
 0 -13 11 6821.6 494.614 45
 0 13 -11 7187.33 497.115 75
 0 13 -12 5430.06 452.177 16
 0 -13 12 6289.57 479.45 48
 0 13 -12 5933.13 438.263 75
 0 -13 12 5369.56 375.762 49
 0 13 12 6249.89 464.139 35
 0 -13 12 6238.74 429.027 43
 0 -13 12 5173.76 426.635 24
 0 13 -12 5486.45 391.619 47
 0 -13 -12 5440.17 429.226 59
 0 -13 -12 6006.12 422.994 38
 0 13 12 5357.98 459.109 15
 0 13 12 5567.31 420.532 27
 0 -13 12 5719.51 423.765 58
 0 13 12 5598.26 505.845 32
 0 -13 -12 5863.85 431.986 20
 0 -13 12 6072.47 459.402 52
 0 -13 12 6231.7 450.9 45
 0 -13 -12 6356.74 451.074 67
 0 13 -12 6054.48 458.685 15
 0 -13 -12 6353.27 471.683 66
 0 -13 13 3543.73 348.266 52
 0 -13 -13 3374.29 306.571 38
 0 13 -13 2901.9 270.135 47
 0 13 -13 3686.72 332.874 75
 0 13 13 3013.59 382.258 41
 0 -13 -13 3495.11 320.005 59
 0 -13 13 3848.6 340.953 24
 0 13 13 3339.77 319.924 27
 0 -13 13 3413.07 314.916 58
 0 -13 -13 3363.12 343.781 66
 0 -13 13 3527.24 334.643 45
 0 -13 -13 3455.22 332.346 67
 0 13 13 3359.3 350.225 15
 0 -13 13 3356.37 304.274 43
 0 13 13 3176.02 326.827 35
 0 13 -13 3714.97 360.41 16
 0 -13 -13 3451.6 314.659 20
 0 13 -13 3621.19 345.227 15
 0 -13 13 3120.95 258.43 49
 0 -13 14 29904.2 1449.97 52
 0 13 14 24489.8 1464.1 41
 0 -13 -14 28631.4 1452 67
 0 -13 -14 29926.6 1470.78 66
 0 13 -14 28562.1 1448.3 75
 0 -13 -14 28613.5 1438.15 20
 0 13 -14 25677.8 1365.09 47
 0 -13 14 29297 1401.95 43
 0 13 -14 29315.3 1474.9 16
 0 -13 -14 28883.2 1431.17 59
 0 13 14 29702.2 1473.88 15
 0 -13 -14 29086.1 1427.16 38
 0 13 14 29893.1 1452.44 35
 0 -13 14 29172.2 1415.44 58
 0 13 -14 28588.9 1446.66 15
 0 -13 -14 27388.3 1391.6 46
 0 -13 14 27002.5 1433.85 24
 0 -13 14 29065.1 1430.7 45
 0 13 14 27109.4 1402.13 27
 0 13 -15 2296.12 278.747 15
 0 -13 -15 2480.87 294.524 66
 0 13 -15 2500.58 277.939 75
 0 13 15 2426.1 329.872 41
 0 -13 15 2371.43 285.177 52
 0 -13 15 2484.92 253.476 58
 0 -13 -15 2250.37 248.958 38
 0 -13 -15 2392.74 279.612 67
 0 13 -15 2349.35 298.401 16
 0 -13 15 2790.06 300.057 24
 0 13 15 2479.45 271.723 35
 0 13 15 2028.21 279.206 15
 0 -13 -15 2430.27 258.661 59
 0 -13 16 6101.76 468.073 48
 0 -13 -16 6484.45 472.24 66
 0 -13 16 6517.11 467.358 24
 0 -13 16 6500.23 454.051 52
 0 -13 -16 6057.49 442.943 61
 0 13 -16 5779.34 449.628 75
 0 -13 -16 6068.79 462.574 67
 0 13 -16 6512.77 488.193 16
 0 13 16 6174.74 493.382 41
 0 -13 -16 5646.92 407.459 55
 0 13 16 5451.39 447.026 15
 0 -13 -16 5993.34 425.505 59
 0 13 -16 6160.84 451.73 15
 0 -13 16 6524.36 416.256 58
 0 13 16 6106.16 437.459 35
 0 -13 -16 5383.54 419.595 38
 0 -13 17 1144.68 235.185 48
 0 13 17 1539.16 263.922 41
 0 -13 -17 1325.71 203.208 61
 0 -13 17 935.264 155.588 58
 0 -13 -17 1191.85 217.056 66
 0 -13 -17 1322.53 216.929 67
 0 13 17 1057.15 209.156 15
 0 -13 -17 1349.05 173.978 55
 0 13 -17 1037.78 235.469 16
 0 -13 -17 1179.68 191.145 38
 0 13 17 1064.59 278.581 32
 0 13 -17 959.416 196.992 75
 0 13 -17 1048.63 201.139 15
 0 -13 17 1131.34 232.086 24
 0 13 17 960.742 172.741 35
 0 -13 -18 945.079 191.382 67
 0 -13 -18 1221.66 194.116 61
 0 -13 -18 1031.39 161.184 55
 0 13 18 1048.64 227.282 41
 0 13 -18 1009.57 198.066 15
 0 13 -18 1051.12 199.351 75
 0 -13 18 786.647 137.712 58
 0 -13 18 778.499 213.133 24
 0 13 18 1104.2 267.211 32
 0 -13 18 1217.95 223.115 48
 0 -13 -18 1049.94 204.049 66
 0 13 18 756.782 177.957 15
 0 -13 -19 5245.41 392.315 61
 0 13 -19 4823.58 385.002 15
 0 -13 -19 5104.83 367.535 55
 0 -13 19 5523.35 427.075 24
 0 -13 -19 5967.11 426.61 66
 0 13 19 5536.54 427.506 41
 0 13 19 5473.59 450.932 32
 0 13 -19 5638.81 423.085 75
 0 -13 19 5193.86 412.208 48
 0 -13 -20 85.6633 107.221 61
 0 -13 20 -31.7191 158.769 48
 0 13 20 95.5845 174.658 32
 0 13 20 64.5096 141.192 41
 0 -13 -20 103.48 144.392 66
 0 -13 20 23.2486 169.926 24
 0 -13 -20 126.534 91.8372 55
 0 13 -20 48.8314 135.03 75
 0 13 -20 38.9388 127.844 15
 0 13 21 2926.21 294.805 73
 0 -13 21 2610.56 283.369 24
 0 -13 21 2296.4 253.759 48
 0 13 -21 2188.06 250.822 75
 0 13 21 2525.83 248.152 41
 0 -13 -21 2448.76 241.982 61
 0 -13 -21 2187.12 243.688 66
 0 -13 -21 2201.6 211.687 55
 0 13 21 2385.59 282.297 32
 0 13 -21 2239.13 232.076 15
 0 -13 -22 483.746 110.341 55
 0 13 -22 172.528 124.829 75
 0 13 -22 424.267 122.014 15
 0 13 22 858.874 188.727 73
 0 -13 -22 388.404 135.626 66
 0 13 22 359.556 126.796 41
 0 -13 22 443.4 150.112 48
 0 -13 -22 443.54 124.197 61
 0 -13 22 484.099 170.114 24
 0 13 22 418.366 167.177 32
 0 -13 -23 6002.92 372.847 55
 0 -13 -23 5844.03 394.837 66
 0 -13 -23 6308.32 401.517 61
 0 13 -23 5996.21 373.597 15
 0 13 23 6502.68 425.329 32
 0 -13 23 6270.2 402.597 48
 0 13 -23 6033.27 415.389 75
 0 -13 23 6404.61 428.067 24
 0 13 -23 6122.69 426.371 16
 0 -13 24 2980.79 272.124 29
 0 13 24 2857.27 255.251 32
 0 -13 24 3214.39 270.47 24
 0 -13 -24 2878.68 232.633 66
 0 13 -24 2888.33 248.604 75
 0 13 -24 2395.52 201.141 15
 0 13 -24 3076.29 264.241 16
 0 -13 -24 2697.96 229.757 61
 0 13 25 -42.9125 101.609 32
 0 -13 25 -7.79624 112.365 24
 0 -13 -25 -55.0999 73.5628 66
 0 -13 -25 6.93499 72.4101 61
 0 13 -25 60.9957 83.2892 75
 0 13 -25 71.5583 98.4171 16
 0 -13 25 8.55837 111.881 29
 0 13 26 638.761 133.841 73
 0 13 26 682.704 118.426 32
 0 13 -26 569.43 108.068 75
 0 13 -26 691.169 119.521 16
 0 -13 26 769.594 135.21 29
 0 -13 26 647.749 127.919 24
 0 -13 -26 546.906 96.4425 61
 0 -13 27 125.885 86.7927 29
 0 13 -27 22.7658 71.4843 16
 0 -13 27 5.88271 79.2129 24
 0 13 -27 76.566 56.4774 75
 0 13 27 30.5582 85.2497 73
 0 -13 -27 43.5708 47.0485 61
 0 13 27 14.1266 60.5177 32
 0 -13 28 270.354 76.2636 24
 0 13 28 172.025 69.1259 73
 0 13 -28 304.063 68.6397 16
 0 -14 0 5996.97 459.878 49
 0 -14 0 5869.84 435.679 68
 0 14 0 7403.63 476.067 32
 0 14 0 6032.58 451.269 69
 0 -14 0 6447.62 443.416 31
 0 -14 0 6415.95 483.552 66
 0 14 0 6892.66 477.105 47
 0 -14 0 6581.66 411.248 20
 0 14 0 6816.84 497.451 15
 0 14 -1 3010.55 308.248 47
 0 -14 -1 2588.34 262.121 31
 0 -14 1 2195.65 266.605 49
 0 -14 -1 2398.52 266.254 68
 0 14 1 2616.25 316.96 15
 0 -14 -1 2803.89 307.852 66
 0 14 -1 2461.95 275.157 32
 0 -14 -1 2353.6 223.307 20
 0 14 1 2618.47 293.288 32
 0 14 1 2716.48 291.229 14
 0 14 1 2355.71 259.718 69
 0 14 -1 2632.66 279.984 69
 0 -14 1 2515.21 263.956 68
 0 -14 -1 2711.33 290.373 49
 0 -14 1 2351.61 290.759 66
 0 -14 1 2723.87 265.985 31
 0 14 1 2260.04 292.918 47
 0 14 -1 2000.43 305.385 15
 0 14 2 2045.55 246.078 69
 0 -14 -2 2461.1 266.421 68
 0 14 2 2654.23 317.901 15
 0 -14 -2 2080.7 214.266 20
 0 -14 2 1995.08 270.261 66
 0 -14 -2 2471.46 261.566 31
 0 14 2 2609.09 294.475 32
 0 -14 2 2511.29 277.851 49
 0 14 2 2214.75 281.788 47
 0 -14 -2 2087.07 282.408 66
 0 14 -2 2053.61 272.427 47
 0 -14 2 2409.7 243.633 31
 0 14 -2 2459.27 270.263 69
 0 14 2 1815.3 249.778 14
 0 -14 2 2381.14 245.6 68
 0 14 -2 2133.04 261.236 32
 0 -14 -3 19470.2 1029.43 68
 0 -14 3 18417.3 1016.46 49
 0 -14 -3 21405.3 1085.57 59
 0 14 3 19910.3 1045.55 32
 0 14 -3 18143.1 1021.29 47
 0 -14 3 19188 997.664 31
 0 -14 -3 18618.7 1016.14 31
 0 14 -3 17958.1 1028.89 69
 0 -14 3 18799.5 1001.22 68
 0 -14 3 19480.9 1014.04 29
 0 14 -3 18977.6 1007.8 32
 0 -14 3 19303.3 1059.3 66
 0 -14 -3 18578.8 983.431 20
 0 14 3 19596.6 1044.22 47
 0 14 3 19491.3 1035.07 14
 0 -14 -3 19693.3 1072.8 66
 0 14 3 19886.7 1064.68 15
 0 -14 4 304.721 187.627 66
 0 -14 4 321.061 179.425 58
 0 -14 -4 390.925 190.237 59
 0 14 4 538.767 224.217 15
 0 -14 4 320.322 142.638 29
 0 14 4 539.096 174.725 14
 0 14 -4 665.591 188.801 47
 0 14 -4 454.963 171.67 69
 0 14 4 328.294 208.031 47
 0 -14 -4 189.486 156.424 68
 0 -14 4 419.421 138.768 68
 0 14 -4 530.209 166.002 32
 0 -14 -4 284.957 163.423 31
 0 -14 -4 380.157 200.762 66
 0 -14 -4 360.569 105.084 38
 0 -14 4 385.937 124.566 31
 0 -14 -4 349.995 125.499 20
 0 -14 4 292.401 163.561 49
 0 14 -4 539.685 195.121 16
 0 14 4 680.735 229.461 32
 0 14 -5 9111.67 549.013 32
 0 -14 5 8876.99 540.166 68
 0 14 5 9265 606.179 32
 0 -14 -5 8770.47 577.037 68
 0 -14 5 8542.23 564.938 29
 0 -14 -5 8884.27 540.865 20
 0 -14 -5 9051.52 526.776 38
 0 14 -5 8217.54 551.356 75
 0 -14 5 9225.23 569.083 49
 0 -14 -5 8934.48 561.217 67
 0 14 -5 7742.09 583.563 15
 0 14 -5 8997.41 581.106 69
 0 -14 5 8393.72 581.59 66
 0 14 5 8589.26 516.897 27
 0 14 -5 8878.31 563.38 47
 0 14 -5 9082.35 596.987 16
 0 14 5 8787.07 597.198 47
 0 -14 -5 8814.18 564.973 31
 0 14 5 8755.28 565.67 14
 0 14 5 9476.24 614.643 15
 0 -14 5 9246.24 593.687 58
 0 -14 5 9277.32 536.173 31
 0 -14 -5 9328.51 611.818 59
 0 -14 -5 9383.13 621.923 66
 0 -14 -6 23754.5 1164.09 67
 0 -14 6 22926.4 1171.61 58
 0 14 6 21089.4 1143.64 14
 0 -14 -6 22005 1131.79 20
 0 14 -6 21618.1 1138.47 47
 0 -14 6 21941.6 1107.03 31
 0 -14 -6 21238.2 1150.07 31
 0 14 -6 22766.9 1185.41 15
 0 -14 -6 21508.9 1111.71 38
 0 14 6 24139 1200.53 32
 0 -14 6 21084.2 1153.5 48
 0 -14 -6 20825.9 1187.38 66
 0 14 -6 22088.9 1125.08 32
 0 14 -6 22714 1176.34 69
 0 -14 6 22086.2 1121.94 68
 0 14 -6 23582.6 1192.46 16
 0 -14 -6 22846 1169.74 68
 0 -14 6 22626.4 1181.25 66
 0 14 6 24086.1 1204.56 15
 0 14 6 22462.6 1197.15 47
 0 -14 6 22694.1 1169.17 29
 0 -14 -6 24556.3 1213.38 59
 0 14 6 20764.8 1097.03 27
 0 -14 6 20874.6 1121.45 24
 0 14 -6 20391.9 1139.06 75
 0 -14 6 22433.6 1145.78 49
 0 -14 -7 1420.51 248.589 59
 0 14 7 1309.1 209.908 14
 0 -14 -7 1994.34 259.223 68
 0 -14 -7 1676.94 233.661 67
 0 14 -7 1503.59 241.551 16
 0 -14 7 1610.12 219.637 49
 0 14 7 1501.19 271.61 15
 0 -14 7 1184.84 164.068 31
 0 14 -7 1393.06 196.488 32
 0 -14 7 1592.57 251.766 58
 0 -14 -7 1514.1 198.832 20
 0 -14 -7 1933.61 245.748 31
 0 -14 7 1566.25 257.988 48
 0 -14 7 1392.04 180.344 68
 0 -14 7 1581.7 240.31 29
 0 -14 7 1250.61 198.886 24
 0 14 -7 1876.19 293.25 15
 0 14 -7 1522.72 233.764 69
 0 14 7 2077.95 325.228 47
 0 14 -7 1444.51 212.927 75
 0 -14 7 1520.6 222.188 66
 0 14 7 1187.17 197.552 27
 0 14 -7 1766.53 238.62 47
 0 14 7 2539.63 327.072 32
 0 -14 -7 1562.45 190.93 38
 0 14 -8 36342.2 1841.23 16
 0 14 -8 36035.1 1767.03 32
 0 -14 8 36465.2 1823.51 66
 0 -14 8 35663.1 1819.06 48
 0 14 -8 35990 1804.89 75
 0 14 -8 37379.3 1791.84 47
 0 14 8 36078.1 1762.11 27
 0 -14 8 39667.6 1846.32 29
 0 -14 -8 37727.2 1845.18 59
 0 -14 -8 38609.4 1820.55 67
 0 -14 8 37651.3 1764.4 68
 0 -14 8 37582.1 1823.35 58
 0 14 8 36472.7 1796.71 14
 0 -14 8 38054.3 1792.37 49
 0 14 -8 38458.1 1837.36 69
 0 -14 -8 36681.3 1777.39 38
 0 -14 -8 35248.7 1790.47 20
 0 14 8 39696 1863.77 15
 0 14 8 37883.8 1854.86 32
 0 -14 8 35688.5 1787.71 24
 0 14 -8 38363.1 1841.45 15
 0 -14 -9 3771.98 336.965 67
 0 -14 9 4038.29 317.396 49
 0 14 -9 3532.23 353.865 15
 0 14 -9 3281.23 309.714 75
 0 -14 -9 4141.58 331.439 20
 0 14 9 3491.55 397.572 32
 0 -14 9 3794.37 325.464 24
 0 -14 -9 4153.32 364.345 59
 0 -14 9 3842.31 357.524 29
 0 14 -9 4121.41 367.384 16
 0 -14 9 3705.4 339.178 58
 0 14 9 3604.51 366.711 15
 0 14 9 3781.68 321.105 14
 0 -14 9 3701.72 358.637 48
 0 -14 -9 3624.75 304.04 38
 0 14 -9 3947.88 299.426 32
 0 -14 9 3904 341.848 66
 0 14 9 3332.63 300.956 27
 0 14 -9 3593.1 314.467 47
 0 -14 -10 2128.63 294.681 66
 0 14 -10 2599.13 268.819 75
 0 -14 10 2131.76 227.926 49
 0 14 10 2144.87 334.114 32
 0 -14 -10 2314.02 238.138 38
 0 14 -10 2233.96 294.411 15
 0 -14 -10 2676.77 273.299 67
 0 -14 10 2267.17 253.906 24
 0 14 10 2613.66 306.167 15
 0 -14 10 2223.24 267.226 58
 0 14 -10 2296.32 241.065 47
 0 -14 -10 2503.85 257.749 20
 0 -14 -10 2343.04 278.965 59
 0 -14 10 2216.68 298.956 48
 0 14 10 2206.36 244.676 27
 0 -14 10 2631.99 297.093 29
 0 14 -10 2670.09 300.872 16
 0 -14 10 2254.39 265.224 66
 0 -14 -11 3202.86 308.963 59
 0 -14 11 3056.28 260.06 49
 0 -14 11 2827.99 325.105 48
 0 -14 11 3062.01 293.681 24
 0 14 -11 2660.18 313.664 15
 0 14 11 3101.96 317.993 35
 0 -14 -11 2906.4 283.234 20
 0 -14 -11 3235.51 330.24 66
 0 14 11 3021.08 334.324 15
 0 14 11 2297.75 358.622 32
 0 -14 -11 3190.56 297.479 67
 0 -14 11 2941.91 301.322 58
 0 14 -11 2916.15 325.896 16
 0 -14 -11 2950.74 270.279 38
 0 -14 11 2727.64 281.882 66
 0 14 -11 3087.85 290.411 75
 0 14 11 2890.87 280.187 27
 0 14 -11 2654.74 258.789 47
 0 -14 12 7798.13 513.589 24
 0 14 12 7907.28 534.179 35
 0 14 -12 8382.65 546.275 15
 0 -14 -12 7394.82 504.803 20
 0 -14 12 7550.4 506.836 58
 0 -14 12 7219 503.079 66
 0 14 12 8109.21 556.813 15
 0 -14 -12 8009.35 527.719 67
 0 14 12 6678.42 563.701 32
 0 -14 -12 8782.35 569.51 66
 0 14 12 6430.64 557.017 41
 0 -14 12 8182.18 557.702 48
 0 14 -12 7892.51 547.693 16
 0 -14 -12 8274.85 503.215 38
 0 -14 -12 8590.33 536.581 59
 0 14 -12 6904.15 464.626 47
 0 -14 12 7271.6 458.492 49
 0 14 -12 8001.6 519.615 75
 0 -14 -13 13424.2 751.487 66
 0 -14 13 11256.9 687.525 24
 0 14 13 12187 708.884 35
 0 14 13 12633.1 736.568 15
 0 -14 -13 12950.4 716.997 67
 0 -14 13 11855.1 726.751 48
 0 14 -13 12227.2 714.176 15
 0 -14 -13 11291.4 669.928 38
 0 -14 -13 12498.5 702.719 59
 0 -14 13 11361.3 681.222 66
 0 -14 -13 11336.1 658.965 46
 0 14 13 10028.2 738.438 32
 0 -14 13 12321.1 687.99 58
 0 14 -13 12184.2 732.006 16
 0 14 -13 10057.1 628.141 47
 0 14 -13 11650.4 692.801 75
 0 14 13 10872.7 745.059 41
 0 -14 14 46.0847 153.262 24
 0 -14 -14 146.413 120.05 61
 0 -14 -14 11.2157 109.857 59
 0 14 -14 200.11 172.194 16
 0 -14 -14 20.9326 113.725 38
 0 -14 -14 61.0542 148.288 67
 0 14 14 25.528 162.557 15
 0 -14 14 221.808 130.173 58
 0 14 -14 36.2432 155.949 15
 0 -14 -14 120.563 175.939 66
 0 14 14 70.562 136.998 35
 0 -14 14 220.726 112.049 66
 0 14 14 57.883 224.295 41
 0 -14 -14 147.014 89.3478 55
 0 14 -14 167.306 133.815 75
 0 -14 -15 6363.98 440.385 38
 0 -14 -15 7186.56 463.811 61
 0 14 15 7237.54 524.551 41
 0 -14 -15 6084.34 414.955 55
 0 -14 -15 7113.27 458.219 59
 0 -14 15 6883.88 472.625 24
 0 14 15 5971.75 444.753 35
 0 14 -15 7638.06 505.039 16
 0 -14 -15 6517.61 482.544 66
 0 14 15 6494.4 480.33 15
 0 14 -15 6398.13 459.459 75
 0 -14 15 6919.72 438.939 58
 0 -14 -15 7079.36 480.975 67
 0 -14 15 6201.54 433.475 66
 0 14 -15 6861.22 476.2 15
 0 -14 -16 1219.42 202.644 67
 0 14 -16 1119.04 207.727 15
 0 14 -16 1256.39 228.705 16
 0 -14 -16 1361.82 189.971 61
 0 -14 16 898.09 146.172 66
 0 14 16 1006.72 180.802 35
 0 14 16 987.38 191.202 15
 0 -14 -16 1161.1 153.678 55
 0 14 -16 1194.9 193.8 75
 0 14 16 1398.47 261.797 41
 0 -14 16 1045.95 199.255 24
 0 -14 -16 1174.78 210.853 66
 0 -14 17 723.93 184.784 24
 0 14 -17 973.397 188.17 15
 0 -14 17 890.302 213.523 48
 0 -14 -17 909.924 161.753 61
 0 14 -17 985.683 181.604 75
 0 14 17 665.755 167.099 15
 0 -14 -17 1002.07 196.975 66
 0 14 -17 945.394 203.625 16
 0 14 17 862.903 208.62 41
 0 -14 -17 844.581 133.028 55
 0 -14 18 1235.88 221.604 48
 0 14 -18 1420.09 228.665 16
 0 -14 -18 1530.89 188.422 61
 0 14 18 1279.28 258.678 32
 0 -14 -18 1354.03 155.311 55
 0 14 -18 1419.44 201.482 75
 0 -14 18 1445.61 217.597 24
 0 -14 -18 1464.05 209.133 66
 0 14 18 1282.37 222.62 41
 0 14 -18 1304.04 197.405 15
 0 14 18 1128.53 182.391 15
 0 14 19 3719.96 335.515 32
 0 14 19 4196.26 331.622 73
 0 -14 19 4008.8 344.442 29
 0 -14 -19 3179.01 248.085 55
 0 14 -19 3378.96 288.477 15
 0 -14 -19 3452.72 301.976 66
 0 -14 19 3508.53 311.038 24
 0 -14 19 3494.28 309.156 48
 0 14 19 3469.14 309.263 41
 0 14 -19 3227.34 291.04 75
 0 -14 -19 3677.61 288.906 61
 0 14 -19 3105.28 320.804 16
 0 -14 -20 191.176 101.343 61
 0 14 -20 258.124 120.508 75
 0 -14 20 253.194 149.536 24
 0 -14 20 368.765 167.111 29
 0 14 20 286.978 163.601 32
 0 14 -20 252.614 120.53 15
 0 -14 -20 403.375 134.059 66
 0 14 20 419.984 155.904 73
 0 14 20 217.392 136.531 41
 0 -14 21 262.639 145.348 24
 0 14 21 649.402 135.296 41
 0 14 -21 456.435 123.775 75
 0 14 21 477.538 170.723 32
 0 -14 21 310.105 153.24 29
 0 14 21 402.742 144.984 73
 0 14 -21 400.745 116.06 15
 0 -14 -21 415.457 108.265 61
 0 14 22 52.0461 118.361 73
 0 14 22 131.218 86.7158 41
 0 14 22 50.5468 125.818 32
 0 14 -22 139.298 104.511 75
 0 -14 22 160.503 141.432 29
 0 -14 -22 122.709 81.0337 61
 0 14 -22 341.399 91.1588 15
 0 -14 -22 117.339 91.7934 66
 0 -14 22 150.338 127.188 24
 0 -14 -23 2854.21 215.051 61
 0 14 -23 2442.12 191.486 15
 0 14 -23 3084.3 234.135 75
 0 -14 23 3014.09 245.943 24
 0 14 23 3247.56 252.05 32
 0 -14 23 2661.73 212.32 57
 0 -14 -23 2698.24 217.469 66
 0 14 23 2840.23 246.778 73
 0 14 -24 448.783 90.8195 75
 0 14 24 317.8 112.697 73
 0 14 -24 330.853 106.675 16
 0 -14 -24 456.418 79.2795 61
 0 14 24 523.046 116.318 32
 0 -14 24 490.419 119.683 24
 0 -14 24 322.212 78.6676 57
 0 -14 -24 300.827 76.4999 66
 0 14 25 1378.62 142.904 32
 0 -14 25 1656.31 163.925 29
 0 -14 25 1470.54 151.945 24
 0 14 -25 1355.63 145.867 16
 0 14 -26 -19.7539 52.9487 69
 0 14 -26 47.9934 55.2729 16
 0 -14 26 52.0816 59.7314 24
 0 -14 26 26.5469 62.8201 29
 0 -15 0 121.459 177.315 66
 0 -15 0 233.365 141.793 31
 0 15 0 196.492 212.835 15
 0 -15 0 132.394 129.324 68
 0 15 0 33.714 122.197 69
 0 15 0 247.435 181.031 47
 0 15 0 358.821 190.667 32
 0 15 0 121.408 146.784 14
 0 15 1 10483.3 631.992 14
 0 -15 -1 10195.8 659.577 66
 0 15 -1 9401.51 622.776 14
 0 15 1 10321.1 635.345 32
 0 -15 1 10080.3 612.06 68
 0 15 -1 10464.2 624.607 32
 0 -15 -1 10063.1 609.722 31
 0 -15 1 8513.02 627.019 66
 0 15 1 10953.3 672.277 15
 0 15 -1 10084.8 618.065 69
 0 15 -1 10101 631.063 47
 0 -15 1 10509.8 610.636 31
 0 15 1 10577.3 651.05 47
 0 -15 -1 10027.5 616.812 68
 0 15 -1 10134.4 661.383 15
 0 15 2 11590.8 714.502 47
 0 15 -2 11373.5 697.081 69
 0 -15 -2 11515.3 652.04 20
 0 15 -2 12308.7 709.598 47
 0 15 2 12714.5 725.223 32
 0 -15 2 12108.6 688.802 68
 0 15 2 12103.5 750.676 15
 0 -15 -2 12849.2 748.568 66
 0 -15 -2 11889.4 700.199 68
 0 15 2 11699 700.419 14
 0 15 -2 12315.2 698.214 32
 0 -15 -2 10699.2 678.605 31
 0 -15 -2 11122.3 733.466 59
 0 -15 2 12753.6 743.347 66
 0 -15 2 12529.9 685.105 31
 0 -15 -2 11423.2 675.283 67
 0 -15 -3 320.643 125.597 67
 0 -15 3 175.18 118.259 31
 0 -15 3 134.183 120.875 68
 0 15 -3 369.114 181.094 47
 0 15 3 384.178 209.555 32
 0 -15 -3 534.715 173.122 31
 0 15 3 371.184 200.225 47
 0 -15 -3 288.904 161.682 68
 0 -15 -3 414.237 185.577 66
 0 -15 3 391.955 159.119 66
 0 15 -3 364.204 167.117 32
 0 15 3 305.984 211.561 15
 0 -15 -3 277.853 110.111 20
 0 15 -3 258.321 145.928 69
 0 -15 -3 263.704 170.639 59
 0 15 3 347.287 150.591 14
 0 15 4 6368.58 480.018 47
 0 15 -4 6270.48 426.436 32
 0 -15 -4 5560.73 412.257 67
 0 -15 4 6438.7 460.704 66
 0 -15 -4 5883.25 403.216 20
 0 15 -4 6056.19 439.808 69
 0 15 4 6247.48 486.729 15
 0 -15 4 6283.17 409.905 31
 0 -15 -4 6740.54 489.823 59
 0 15 4 6144.82 435.258 14
 0 -15 4 5668.54 408.32 68
 0 -15 4 6235.33 421.709 29
 0 15 4 6062.94 464.426 32
 0 -15 -4 6326.96 443.444 31
 0 -15 -4 6452.38 482.088 66
 0 15 -4 5937.37 435.44 47
 0 -15 -4 5885.88 444.073 68
 0 15 5 1273.98 252.665 47
 0 -15 5 915.852 194.688 66
 0 -15 -5 923.516 167.849 67
 0 15 5 909.058 230.245 15
 0 15 -5 1049.88 195.34 69
 0 -15 5 902.227 146.617 31
 0 -15 -5 905.152 213.843 59
 0 -15 5 753.937 159.456 29
 0 -15 -5 1028.79 223.782 66
 0 -15 -5 1218.65 206.166 68
 0 -15 5 768.652 150.384 68
 0 -15 -5 976.425 159.279 20
 0 15 -5 941.964 176.42 32
 0 15 -5 762.968 188.933 47
 0 15 5 1152.82 241.548 32
 0 15 5 1053.22 184.618 14
 0 15 6 374.483 204.83 15
 0 15 -6 46.6507 121.669 32
 0 15 -6 143.889 138.269 69
 0 -15 -6 203.251 163.809 59
 0 15 6 296.588 207.185 47
 0 15 6 205.248 202.548 32
 0 15 -6 430.128 162.74 47
 0 -15 -6 174.356 118.389 20
 0 15 -6 302.58 190.044 15
 0 -15 6 33.3967 117.251 29
 0 -15 6 107.421 94.9077 31
 0 -15 6 109.69 100.74 68
 0 15 6 270.302 137.838 14
 0 -15 -6 292.123 174.809 66
 0 -15 -6 163.637 114.911 67
 0 -15 6 187.855 151.428 66
 0 15 -7 4581.01 393.074 15
 0 -15 7 4267.93 368.804 66
 0 -15 -7 4148.73 311.886 38
 0 -15 -7 4408.67 340.462 20
 0 15 -7 4474.95 334.66 32
 0 -15 7 4672.9 366.47 29
 0 15 -7 4300.01 377.716 16
 0 -15 7 4342.65 318.146 68
 0 -15 -7 4645.8 362.143 67
 0 15 -7 5018.75 368.036 47
 0 15 7 4668.14 406.276 15
 0 15 7 4642.75 354.354 14
 0 15 -7 4352.24 364.597 69
 0 -15 -7 4736.64 400.545 59
 0 15 7 4244.02 402.535 32
 0 15 -8 2354.68 297.858 15
 0 15 -8 2401.5 232.899 32
 0 15 -8 2492.81 284.394 16
 0 -15 -8 2771.93 263.401 67
 0 -15 -8 2432.08 244.779 20
 0 15 -8 2958.77 267.026 47
 0 15 8 2442.07 307.73 15
 0 -15 -8 2502.02 230.831 38
 0 -15 8 2885.23 285.732 29
 0 -15 8 2527.47 273.874 66
 0 -15 -8 2915.29 300.821 59
 0 15 -8 2712.55 254.567 75
 0 15 -8 2576.39 278.963 69
 0 15 8 2321.38 327.514 32
 0 15 9 463.374 242.014 32
 0 -15 9 344.842 130.238 24
 0 -15 -9 698.129 159.102 67
 0 -15 9 452.031 155.678 29
 0 15 9 513.088 203.774 15
 0 -15 -9 606.622 149.856 20
 0 -15 9 445.187 155.981 66
 0 15 -9 530.076 144.672 47
 0 15 -9 541.587 164.756 69
 0 15 9 844.315 212.872 35
 0 -15 -9 636.23 189.77 59
 0 15 -9 452.026 169.727 16
 0 15 -9 378.55 130.712 75
 0 -15 -9 506.324 119.597 38
 0 15 -9 331.06 175.541 15
 0 -15 10 1109.12 201.078 29
 0 -15 -10 1095.67 188.015 67
 0 15 -10 1025.87 164.873 47
 0 15 -10 892.226 162.487 75
 0 -15 10 1121.12 180.795 66
 0 15 10 1337.77 230.749 35
 0 -15 10 1047.86 171.725 24
 0 15 -10 850.114 195.041 16
 0 15 10 744.027 254.098 32
 0 -15 -10 935.467 162.525 20
 0 15 10 908.206 230.17 15
 0 -15 -10 988.448 154.591 38
 0 15 10 1086.51 304.507 41
 0 -15 -10 788.776 188.896 59
 0 15 -10 1040.09 227.781 15
 0 15 -10 1105.44 198.309 69
 0 -15 -11 355.674 154.703 59
 0 15 11 446.48 246.027 41
 0 15 -11 562.648 172.259 69
 0 -15 11 402.785 146.182 24
 0 -15 -11 465.309 191.102 66
 0 15 -11 464.831 123.566 47
 0 -15 11 477.22 143.535 66
 0 -15 11 401.562 160.777 29
 0 15 -11 418.118 128.153 75
 0 15 11 387.257 176.578 35
 0 -15 -11 393.812 147.564 67
 0 -15 -11 469.369 120.373 38
 0 15 11 304.396 175.102 15
 0 15 -11 439.463 186.618 15
 0 15 11 210.971 235.364 32
 0 15 -11 260.984 169.613 16
 0 -15 12 1489.99 229.183 29
 0 -15 12 1343.61 197.754 24
 0 -15 -12 1289.72 202.986 59
 0 15 -12 1156.75 162.3 47
 0 -15 -12 1396.45 176.421 46
 0 15 -12 1484.56 231.599 15
 0 15 12 1378.86 288.469 41
 0 15 -12 1359.54 185.48 75
 0 -15 -12 1597.89 240.318 66
 0 -15 -12 1217.12 191.661 67
 0 15 12 1538.78 245.424 15
 0 -15 -12 1108.65 162.855 38
 0 15 -12 1046.73 195.754 69
 0 -15 12 1406.38 189.076 66
 0 15 12 1217.64 207.187 35
 0 15 -12 1527.79 226.19 16
 0 15 12 1546.11 282.223 32
 0 15 13 582.274 224.308 41
 0 15 13 569.27 165.385 35
 0 -15 13 430.747 125.405 66
 0 15 13 425.387 177.197 15
 0 15 -13 382.244 175.715 15
 0 -15 -13 442.482 175.922 66
 0 -15 -13 549.377 152.583 67
 0 15 -13 441.245 128.944 75
 0 -15 13 383.311 139.822 24
 0 -15 -13 373.703 137.16 59
 0 -15 13 377.423 165.58 29
 0 15 13 279.467 225.25 32
 0 15 -13 294.479 160.265 69
 0 15 -13 450.22 169.396 16
 0 -15 -13 396.025 116.922 61
 0 -15 14 300.9 163.157 29
 0 15 -14 274.845 157.384 16
 0 15 -14 417.91 156.766 69
 0 -15 -14 279.468 139.248 67
 0 15 -14 403.593 127.883 75
 0 15 14 282.93 209.406 32
 0 15 14 293.857 134.748 35
 0 15 14 467.204 214.038 41
 0 15 -14 140.402 149.986 15
 0 -15 -14 464.454 168.306 66
 0 15 14 268.281 162.729 15
 0 -15 -14 252.859 101.803 61
 0 -15 -14 348.256 126.707 59
 0 -15 14 224.494 130.379 24
 0 -15 14 175.16 97.6481 66
 0 -15 -15 771.232 170.203 67
 0 15 15 1038.21 233.653 41
 0 15 -15 967.777 202.049 16
 0 15 -15 718.461 176.277 15
 0 -15 15 777.734 183.567 29
 0 15 -15 738.454 144.283 75
 0 -15 15 563.407 114.251 66
 0 15 -15 761.61 179.932 69
 0 -15 -15 703.011 183.106 66
 0 -15 15 797.93 164.644 24
 0 -15 -15 612.362 129.828 61
 0 15 15 712.086 146.528 35
 0 15 15 643.908 164.395 15
 0 15 -16 2864.01 256.994 75
 0 15 -16 2695.7 278.063 16
 0 15 -16 2925.36 280.444 69
 0 15 -16 2599.89 264.85 15
 0 -15 -16 2649.7 236.507 61
 0 15 16 3198.87 280.861 73
 0 -15 -16 3007.05 280.001 66
 0 15 16 2602.42 258.013 15
 0 -15 16 2966.92 292.076 29
 0 -15 16 2916.38 261.667 24
 0 15 16 2814.63 301.348 41
 0 15 17 895.716 169.899 73
 0 -15 17 696.002 120.153 59
 0 -15 -17 829.449 135.497 61
 0 15 -17 848.767 172.776 69
 0 15 -17 807.937 145.167 75
 0 -15 17 777.525 160.777 24
 0 15 -17 854.358 158.007 15
 0 -15 -17 728.953 163.965 66
 0 15 -17 690.911 170.731 16
 0 15 17 861.946 198.228 41
 0 -15 17 807.935 185.821 29
 0 15 17 715.519 144.378 15
 0 -15 -18 74.792 77.0497 61
 0 -15 -18 -9.63694 108.488 66
 0 -15 18 8.60026 114.84 24
 0 15 -18 -25.5594 84.6636 75
 0 15 -18 8.08025 108.785 15
 0 15 18 239.818 126.199 73
 0 15 -18 40.8118 127.514 16
 0 15 18 -46.6302 139.11 41
 0 15 -18 70.4784 124.639 69
 0 -15 18 123.758 143.83 29
 0 15 -19 407.171 110.179 75
 0 -15 -19 648.629 108.082 61
 0 15 -19 445.781 123.233 15
 0 15 19 586.314 166.065 32
 0 -15 19 507.669 134.498 24
 0 -15 19 634.215 159.317 29
 0 15 19 424.228 141.421 41
 0 15 -19 522.603 145.73 16
 0 15 19 584.94 144.06 73
 0 15 -19 517.613 137.425 69
 0 -15 -19 377.326 123.887 66
 0 -15 -20 -31.2974 88.6049 66
 0 15 20 24.5158 119.044 32
 0 -15 -20 30.5024 62.8626 61
 0 15 20 46.6742 103.881 73
 0 -15 20 211.884 126.807 29
 0 15 -20 60.4874 109.016 69
 0 -15 20 29.6821 106.969 24
 0 15 20 171.946 98.0891 41
 0 15 -20 87.0148 88.6451 15
 0 15 -20 14.0115 65.8979 75
 0 15 -20 8.70323 105.657 16
 0 15 -21 46.4746 69.2455 15
 0 -15 21 13.4637 96.6912 24
 0 -15 21 47.85 106.489 29
 0 15 21 -14.2737 94.1111 73
 0 15 -21 39.0629 105.179 16
 0 15 21 65.4762 109.236 32
 0 -15 -21 58.1215 50.1119 61
 0 15 21 27.226 70.5831 41
 0 15 -21 77.6788 98.4471 69
 0 15 -21 6.04517 56.38 75
 0 -15 -21 20.3441 77.2285 66
 0 -15 -22 3127.85 235.992 66
 0 15 -22 4104.29 272.077 69
 0 15 -22 3408.24 228.549 75
 0 15 22 3720.37 259.498 73
 0 -15 22 3604.38 252.417 24
 0 -15 22 3999.68 275.812 29
 0 15 22 4041.25 269.085 32
 0 15 23 695.036 111.04 32
 0 -15 23 763.852 117.881 29
 0 -15 23 846.471 109.277 24
 0 15 23 702.956 111.181 73
 0 15 -23 859.088 113.95 69
 0 15 24 170.062 69.2068 73
 0 -15 24 269.134 74.3017 29
 0 16 0 42509.2 1992.69 14
 0 16 0 41220.7 2018.82 15
 0 16 0 41518.3 2000.43 47
 0 -16 0 43195.2 2028.98 66
 0 -16 0 39603.5 1946.32 67
 0 16 0 42465.3 1994.08 32
 0 -16 1 3769.21 341.173 66
 0 -16 -1 4270.54 355.373 66
 0 16 1 4080.73 359.494 47
 0 16 1 4241.96 371.062 15
 0 16 -1 3959.38 333.618 14
 0 16 1 3795.22 323.36 14
 0 16 -1 4038.19 332.983 32
 0 -16 -1 3228.06 277.868 67
 0 16 -1 4235.79 376.313 15
 0 -16 1 3950.08 318.323 68
 0 16 1 3767.57 341.435 32
 0 16 -1 3827 346.302 47
 0 16 2 1669.76 252.767 47
 0 16 2 1816.04 275.117 15
 0 16 2 1803.82 218.865 14
 0 -16 -2 1764.02 260.805 59
 0 16 -2 1489.09 215.069 32
 0 -16 -2 1545.63 185.087 67
 0 -16 2 1782.91 211.176 68
 0 16 -2 1657.7 223.73 14
 0 -16 2 1434.22 229.689 66
 0 16 -2 1582.25 239.813 47
 0 16 2 2068.3 255.391 32
 0 -16 -2 1688.66 251.516 66
 0 -16 2 1699.47 247.455 59
 0 16 -3 21937.8 1121.08 14
 0 -16 -3 21364.2 1086.37 67
 0 16 -3 21380.5 1111.51 47
 0 16 -3 21739.1 1098.69 32
 0 -16 3 22997.7 1158.49 59
 0 16 3 22015.8 1108.14 14
 0 16 -3 20321.6 1095.5 69
 0 16 3 21249.5 1142.51 15
 0 -16 3 20558.1 1083.17 68
 0 -16 -3 21324.3 1148.07 59
 0 16 3 20820.4 1123.06 32
 0 -16 -3 23327.5 1162.63 66
 0 16 3 21053.4 1135.56 47
 0 -16 3 22001.1 1138.16 66
 0 16 4 88.6658 122.089 14
 0 16 4 136.339 197.389 15
 0 16 -4 202.66 139.776 32
 0 -16 -4 51.2824 152.583 66
 0 -16 4 63.4713 158.744 59
 0 16 -4 326.377 132.888 69
 0 -16 -4 89.8154 157.396 59
 0 -16 4 213.945 113.634 68
 0 -16 -4 157.443 109.724 67
 0 16 -4 144.063 149.292 14
 0 16 4 148.547 188.736 32
 0 -16 -4 -7.86186 78.9103 20
 0 -16 4 282.007 139.864 66
 0 16 -4 244.855 154.283 47
 0 -16 5 644.758 165.582 66
 0 16 5 902.34 224.016 15
 0 16 -5 626.419 151.77 69
 0 -16 -5 710.079 183.913 59
 0 -16 5 426.909 176.978 59
 0 16 5 588.52 209.804 32
 0 16 -5 663.891 173.697 47
 0 16 5 591.053 140.265 14
 0 -16 5 629.974 126.671 68
 0 -16 -5 517.635 129.279 67
 0 -16 -5 509.808 115.326 20
 0 -16 -5 743.675 192.335 66
 0 16 -5 473.726 144.766 32
 0 -16 -6 1973.44 212.16 67
 0 16 -6 2239.62 219.476 32
 0 -16 -6 1997.2 260.45 59
 0 16 6 1779.26 269.293 32
 0 -16 -6 2162.94 273.435 66
 0 -16 6 2079.7 234.97 66
 0 16 6 1925.69 214.944 14
 0 16 6 2164.17 277.445 15
 0 16 -6 1792.78 217.563 69
 0 16 -6 2367.85 277.683 15
 0 16 -6 1991.21 229.666 47
 0 -16 6 2288.9 260.161 59
 0 -16 7 1518.36 208.356 66
 0 16 -7 1686.58 240.215 15
 0 -16 7 1546.22 188.105 29
 0 16 7 1478.11 258.703 32
 0 -16 -7 1562.16 236.177 59
 0 16 -7 1745.28 211.822 47
 0 -16 -7 1715.55 256.431 66
 0 16 -7 1743.44 211.56 69
 0 -16 -7 1814.27 201.637 67
 0 16 7 1535.03 245.34 15
 0 -16 -8 9575.96 569.3 59
 0 16 8 6739.13 540.788 32
 0 16 8 8825.12 558.808 35
 0 16 8 8715.58 563.97 15
 0 -16 8 8412.8 532.001 66
 0 16 -8 8760.46 534.636 69
 0 -16 -8 8489.4 516.522 67
 0 -16 8 9134.86 528.324 29
 0 16 -8 8096.89 549.457 15
 0 16 -8 8070.11 505.438 47
 0 -16 -9 1729.64 199.571 67
 0 -16 9 1554.24 200.577 66
 0 16 -9 1496.39 208.278 69
 0 -16 9 1274.84 187.906 29
 0 16 -9 1110.77 219.333 15
 0 16 -9 1132.82 173.85 47
 0 16 9 1353.49 263.253 32
 0 16 9 1725.75 247.746 15
 0 16 9 1633.15 235.498 35
 0 -16 -9 1636.54 227.951 59
 0 -16 -10 35156.9 1593.5 59
 0 16 -10 34298.4 1585.47 15
 0 16 10 35212.9 1593.46 35
 0 -16 -10 33997.6 1562.31 67
 0 -16 10 29749.4 1545.34 66
 0 16 10 31645.1 1589.71 32
 0 16 -10 28306.3 1507.93 47
 0 16 10 29752.3 1599.11 41
 0 -16 10 30418.2 1550.45 29
 0 16 -10 32536.1 1566.46 69
 0 16 10 35130.8 1605.7 15
 0 -16 -11 1791.17 189.107 46
 0 16 -11 2049.25 238.831 15
 0 16 11 1929.78 246.955 15
 0 -16 -11 1805.54 218.869 59
 0 16 11 1768.17 277.363 32
 0 16 11 1468.96 260.972 41
 0 16 -11 1469.97 200.863 69
 0 16 -11 1745.69 177.682 47
 0 -16 11 1677.46 191.698 66
 0 -16 11 1700.71 217.216 59
 0 16 11 1912.3 224.174 35
 0 -16 -11 1542.79 190.572 67
 0 -16 -11 1513.95 232.34 66
 0 -16 11 1707.61 209.801 29
 0 -16 -12 4728.37 369.414 66
 0 -16 12 3739.8 301.965 66
 0 16 -12 4332.32 335.63 69
 0 16 12 4902.44 396.15 41
 0 -16 12 4110.32 335.716 29
 0 -16 -12 4535.75 330.025 67
 0 16 -12 4166.23 345.504 15
 0 -16 12 4541.96 340.161 59
 0 16 12 4765.58 385.826 32
 0 16 12 4718.03 343.898 35
 0 16 12 4561.23 322.835 73
 0 16 12 4502.41 357.01 15
 0 -16 -12 4455.69 337.389 59
 0 16 13 -11.3482 176.395 41
 0 -16 -13 -26.8668 92.8742 67
 0 -16 13 -124.261 99.5888 24
 0 16 13 135.526 133.969 15
 0 16 -13 38.8282 110.526 69
 0 16 -13 -57.3031 126.986 15
 0 16 13 48.9714 101.996 73
 0 -16 -13 62.53 105.122 59
 0 -16 13 77.6924 125.857 29
 0 16 13 10.5252 173.761 32
 0 -16 -13 65.7981 129.736 66
 0 16 13 -78.7353 112.877 35
 0 -16 13 -29.3079 75.9845 66
 0 -16 13 35.2032 104.663 59
 0 16 14 5071.98 363.9 15
 0 16 14 5625.93 406.659 32
 0 16 14 5291.17 352.001 73
 0 16 -14 4870.3 363.285 15
 0 16 14 5068.63 343.256 35
 0 16 -14 6000.71 385.921 69
 0 -16 14 4601.25 331.683 24
 0 -16 14 5149.06 349.997 59
 0 16 -14 4890.39 373.246 16
 0 -16 -14 5663.38 392.873 66
 0 16 14 5575.82 407.134 41
 0 -16 14 5648.84 383.013 29
 0 -16 15 2697.23 249.128 29
 0 16 -15 3301 270.229 16
 0 16 15 2724.86 276.061 32
 0 16 15 2821.95 232.626 73
 0 16 -15 2689.36 244.596 15
 0 16 15 2471.5 227.604 15
 0 16 15 3173.46 282.602 41
 0 -16 -15 3356.52 275.495 66
 0 -16 15 2547.22 218.327 24
 0 16 -15 2980.53 254.748 69
 0 -16 15 2551.38 211.392 59
 0 -16 -16 13273.2 675.826 66
 0 16 -16 12175.7 670.069 16
 0 16 16 11486.6 633.336 73
 0 -16 16 11053.6 606.356 59
 0 16 16 12939.6 676.881 41
 0 -16 16 10991.8 619.448 24
 0 16 -16 11232.5 638.201 15
 0 -16 16 12406.7 664.172 29
 0 16 -16 12425.8 661.663 69
 0 16 -17 1605 185.899 69
 0 16 -17 1590.05 172.927 15
 0 -16 17 1940.17 204.591 29
 0 -16 -17 1927.85 198.208 66
 0 16 17 1699.43 199.276 41
 0 -16 17 1605 166.54 24
 0 16 17 2013.05 183.456 73
 0 16 -17 1522.89 184.912 16
 0 -16 -18 789.849 125.344 66
 0 -16 18 562.021 129.99 29
 0 16 18 574.094 125.317 41
 0 16 -18 410.127 115.575 69
 0 -16 18 383.747 99.3594 24
 0 16 -18 447.864 107.371 15
 0 16 18 540.521 110.061 73
 0 16 -19 445.822 84.244 15
 0 16 19 361.186 93.2457 73
 0 -16 -19 494.433 103.781 66
 0 -16 19 412.882 114.287 29
 0 16 19 392.479 94.39 41
 0 16 -19 408.727 103.341 69
 0 -16 19 296.044 82.5837 24
 0 16 20 651.648 115.797 32
 0 16 20 688.743 103.09 73
 0 -16 -20 606.236 98.3561 66
 0 16 -20 729.463 106.663 69
 0 -16 20 664.064 109.276 29
 0 16 21 475.766 93.6223 32
 0 16 21 410.301 80.13 73
 0 -16 21 511.4 91.1272 29
 0 17 0 -8.97257 125.607 32
 0 17 0 63.8373 156.581 15
 0 17 0 60.0538 105.693 14
 0 -17 0 32.0969 113.221 66
 0 17 1 129.748 146.393 32
 0 17 -1 305.753 117.374 14
 0 17 -1 361.351 152.379 47
 0 17 1 395.402 176.914 15
 0 17 1 310.454 116.86 14
 0 -17 -1 378.638 142.032 66
 0 17 -1 348.82 171.676 15
 0 17 -1 330.454 139.851 32
 0 -17 1 210.802 132.985 66
 0 17 -2 752.242 160.135 32
 0 17 -2 607.564 191.645 15
 0 17 -2 698.646 143.727 14
 0 -17 -2 618.165 163.425 59
 0 -17 -2 556.199 155.946 66
 0 -17 2 932.664 167.958 66
 0 -17 2 726.128 184.209 59
 0 17 2 489.662 121.945 14
 0 17 2 610.782 183.917 15
 0 17 2 755.146 173.149 32
 0 17 -2 734.503 161.81 47
 0 -17 3 4163.14 322.152 66
 0 17 -3 3754.12 309.351 47
 0 17 3 3716.84 281.82 14
 0 17 -3 3346.92 277.306 32
 0 17 -3 4033.04 302.844 14
 0 17 3 3327.89 308.099 32
 0 -17 -3 3874.58 331.721 66
 0 17 3 4003.02 337.203 15
 0 -17 -3 3615.99 321.151 59
 0 -17 3 3975.44 335.307 59
 0 -17 4 174.801 137.88 59
 0 17 -4 209.964 138.929 47
 0 17 -4 111.889 109.114 32
 0 -17 -4 -21.9837 135.476 66
 0 17 4 293.762 104.337 14
 0 17 4 85.2943 155.894 15
 0 -17 -4 77.3209 133.474 59
 0 17 -4 8.96275 110.497 14
 0 17 4 67.8076 146.449 32
 0 -17 4 69.3572 108.994 66
 0 17 4 153.069 195.486 41
 0 -17 -4 64.6453 73.0793 67
 0 17 5 3876.11 347.235 32
 0 -17 -5 4986.32 370.4 66
 0 -17 -5 4638.73 359.632 59
 0 17 5 3894.63 370.729 41
 0 -17 -5 4742.66 312.261 67
 0 17 -5 4693.25 337.401 14
 0 17 5 4843.59 373.862 15
 0 -17 5 4284.97 354.377 59
 0 -17 5 4972.81 348.849 66
 0 17 -5 4450.38 331.104 47
 0 -17 -6 807.692 167.122 59
 0 17 -6 769.014 132.608 69
 0 -17 -6 845.834 128.902 67
 0 17 -6 901.795 153.371 47
 0 -17 6 1017.95 183.299 59
 0 17 -6 877.614 159.553 14
 0 17 6 649.324 180.189 32
 0 -17 -6 970.782 179.785 66
 0 17 6 830.059 225.424 41
 0 17 -6 972.703 194.313 15
 0 17 6 971.627 188.496 35
 0 -17 6 973.076 160.125 66
 0 17 6 1052.18 202.398 15
 0 -17 7 2525.43 232.473 66
 0 17 7 1939.98 279.228 41
 0 -17 -7 2238.8 201.514 67
 0 -17 -7 2062.29 235.61 59
 0 17 -7 2237.62 253.079 15
 0 -17 -7 2883.69 273 66
 0 17 7 2057.34 249.471 32
 0 17 7 2694.05 261.665 35
 0 17 -7 2243.71 211.47 69
 0 17 -7 2039.65 221.104 14
 0 -17 7 2544.72 249.272 59
 0 17 7 2552.61 262.8 15
 0 17 -7 2270.75 213.693 47
 0 -17 -8 923.733 131.986 67
 0 17 8 1032.31 189.558 15
 0 -17 8 909.726 167.036 59
 0 -17 8 879.867 145.487 66
 0 17 -8 1006.56 184.309 15
 0 17 8 1157.91 183.468 35
 0 -17 -8 1141.68 182.166 59
 0 17 -8 879.097 141.29 47
 0 17 -8 1015.06 169.011 14
 0 17 8 881.602 196.197 32
 0 17 -8 1097.2 147.759 69
 0 17 -9 312.78 101.356 69
 0 -17 -9 379.732 108.503 46
 0 17 -9 55.2551 125.347 15
 0 17 9 199.811 125.097 35
 0 -17 -9 231.666 90.1339 67
 0 17 9 114.336 138.634 15
 0 17 -9 331.11 128.594 14
 0 -17 -9 293.1 118.549 59
 0 -17 9 297.432 124.476 59
 0 17 9 241.197 157.936 32
 0 -17 9 195.27 98.5447 66
 0 17 -9 81.2779 85.0575 47
 0 17 -10 825.678 168.998 15
 0 -17 -10 864.477 125.011 46
 0 -17 -10 901.28 128.002 67
 0 -17 10 993.123 160.18 59
 0 17 10 841.595 167.454 15
 0 -17 10 821.523 127.593 66
 0 17 10 1120.09 167.747 35
 0 17 10 921.237 215.151 41
 0 -17 -10 986.125 159.913 59
 0 17 10 1001.12 184.65 32
 0 17 -10 1017.37 142.952 69
 0 17 11 95.7268 142.512 32
 0 17 -11 42.4215 116.068 15
 0 -17 11 50.9778 67.4531 66
 0 17 11 8.45305 114.726 15
 0 17 -11 82.9806 92.0388 69
 0 -17 11 33.8192 77.9071 29
 0 17 11 157.31 166.655 41
 0 -17 11 32.1238 92.4939 59
 0 -17 -11 -41.0858 96.7173 59
 0 17 11 69.7489 101.765 35
 0 17 12 -108.21 104.051 15
 0 -17 -12 -64.7291 112.801 66
 0 -17 12 6.71174 80.652 29
 0 -17 12 7.26117 81.261 59
 0 17 -12 14.6438 79.9895 69
 0 17 12 46.2287 146.753 41
 0 17 12 -68.5214 87.2338 35
 0 17 -12 40.0962 105.737 15
 0 17 12 -8.31464 137.27 32
 0 17 13 1957.55 217.243 41
 0 -17 13 1653.9 165.731 29
 0 -17 13 1974.78 174.301 59
 0 17 -13 1682.27 190.258 15
 0 17 13 1692.43 205.929 32
 0 -17 -13 2096.81 207.162 66
 0 17 -13 1877.24 178.169 69
 0 17 13 1736.75 176.131 15
 0 17 13 1517.08 148.625 73
 0 17 14 264.877 126.178 32
 0 17 -14 54.8217 90.2449 15
 0 17 14 157.523 125.575 41
 0 -17 14 113.918 67.8369 59
 0 17 14 160.527 70.0459 73
 0 -17 -14 202.419 105.167 66
 0 17 -14 199.887 86.2572 69
 0 -17 14 170.45 81.7582 29
 0 17 14 228.296 91.2628 15
 0 -17 -15 2815.44 218.717 66
 0 17 -15 2319.5 190.648 69
 0 17 15 1815.1 160.794 73
 0 -17 15 2365.05 188.272 29
 0 17 15 2579.62 220.654 41
 0 17 -15 2294.43 193.589 15
 0 17 15 2361.38 209.455 32
 0 -17 16 313.209 82.6765 29
 0 17 -16 304.294 83.6243 69
 0 17 16 216.848 98.5911 32
 0 -17 -16 292.153 93.1216 66
 0 17 -16 321.435 84.4956 15
 0 17 16 287.586 101.549 41
 0 17 -17 736.669 96.0958 15
 0 -17 -17 872.732 114.569 66
 0 17 17 1044.85 129.645 32
 0 17 17 847.128 110.481 41
 0 18 0 1094.22 129.513 14
 0 18 0 1231.81 151.029 32
 0 18 0 1120.01 179.623 15
 0 -18 0 1359.47 166.292 66
 0 18 0 1152.32 191.204 41
 0 18 1 179.615 130.141 15
 0 18 1 173.604 144.175 41
 0 18 -1 386.57 147.024 41
 0 18 -1 390.029 105.975 32
 0 -18 1 222.613 104.113 66
 0 18 -1 272.245 135.884 15
 0 18 -1 307.239 91.1262 14
 0 -18 -1 144.713 102.366 66
 0 18 1 201.381 108.355 32
 0 -18 -1 269.7 126.801 59
 0 18 2 2576.26 239.978 15
 0 18 -2 2237.26 239.366 41
 0 18 2 2069.36 245.274 41
 0 -18 2 2537.75 238.431 59
 0 18 2 2062.21 207.066 32
 0 -18 2 2401.06 218.819 66
 0 18 -2 2888.15 250.504 15
 0 -18 -2 2762.03 245.725 59
 0 18 -2 2413.37 196.658 14
 0 -18 -2 2453.93 228.399 66
 0 18 3 6400.92 405.9 15
 0 -18 3 5749.73 380.244 66
 0 18 3 6516.9 405.561 35
 0 18 3 6141.76 377.646 32
 0 -18 3 6487.98 406.718 59
 0 -18 -3 6550.22 401.454 66
 0 18 -3 5826.66 358.914 14
 0 18 3 5312.25 403.459 41
 0 18 -3 4924.16 376.976 41
 0 -18 -3 6466.27 405.188 59
 0 -18 4 4330.46 313.299 59
 0 -18 -4 4042.96 306.135 59
 0 18 -4 4247.78 277.653 14
 0 18 4 3706.72 285.382 32
 0 18 4 4475.03 311.511 35
 0 -18 4 3955.4 289.876 66
 0 18 4 3640.2 317.78 41
 0 -18 -4 4468.39 312.007 66
 0 18 -4 3371.64 283.564 41
 0 18 4 4405.69 318.776 15
 0 18 5 1126.4 155.188 32
 0 -18 5 1233.67 149.995 66
 0 18 5 1030.07 158.328 35
 0 -18 5 932.573 153.589 59
 0 -18 -5 1043.13 157.798 66
 0 18 5 1189.19 192.811 41
 0 18 5 1101.62 167.787 15
 0 18 -5 837.395 141.687 41
 0 -18 -5 863.606 152.965 59
 0 18 -5 955.967 131.446 14
 0 18 -6 48.4132 84.4059 41
 0 18 6 62.7259 109.003 32
 0 18 -6 7.90024 112.657 15
 0 18 6 31.6929 112.163 15
 0 -18 6 48.6428 97.4256 59
 0 18 -6 -19.0762 84.5615 14
 0 -18 6 67.4936 82.3454 66
 0 -18 -6 8.18241 100.316 59
 0 -18 -6 76.1019 101.614 66
 0 18 6 61.3058 141.034 41
 0 18 6 46.0475 102.055 35
 0 -18 -7 320.782 109.96 59
 0 -18 7 278.457 104.596 59
 0 18 -7 575.857 133.158 15
 0 18 7 298.485 112.606 35
 0 18 7 330.078 150.549 41
 0 18 -7 296.399 91.9151 14
 0 -18 7 249.613 83.0624 66
 0 -18 -7 367.441 91.3601 46
 0 18 7 232.59 122.234 32
 0 -18 -7 331.576 117.27 66
 0 18 7 289.2 119.442 15
 0 -18 -8 743.578 133.952 66
 0 -18 -8 722.842 128.227 59
 0 18 -8 820.418 117.424 14
 0 18 8 624.74 130.652 15
 0 18 -8 636.702 133.91 15
 0 -18 8 501.996 114.6 59
 0 -18 -8 665.499 98.2259 46
 0 -18 8 524.478 95.18 66
 0 18 8 726.25 137.583 32
 0 18 8 716.08 124.916 35
 0 18 -9 1166.55 133.571 14
 0 -18 -9 1276.09 147.277 59
 0 18 9 1213.25 147.121 15
 0 18 -9 1210.44 158.433 15
 0 -18 9 1230.17 143.215 59
 0 18 9 1101.43 136.852 35
 0 18 9 957.046 141.85 32
 0 -18 9 701.695 100.959 66
 0 18 -10 1035.09 128.049 14
 0 18 10 1121.99 134.271 15
 0 -18 10 1244.52 137.599 59
 0 18 10 1011.83 124.62 35
 0 18 10 1361.99 156.509 32
 0 18 -10 1331.21 154.584 15
 0 18 -11 4913.45 296.529 15
 0 18 11 5515.44 317.364 41
 0 18 11 5079.92 291.373 32
 0 -18 11 4628.87 272.422 59
 0 18 11 4527.08 272.94 15
 0 18 -11 4966.92 284.512 14
 0 18 -12 1648.3 159.638 15
 0 18 12 1957.23 182.96 41
 0 18 12 2013.17 167.846 32
 0 18 -12 1593.78 151.135 14
 0 -18 -12 1904.95 175.248 66
 0 18 -13 3405.54 240.302 15
 0 18 13 4319.68 265.711 41
 0 -18 -13 4073.12 261.482 66
 0 18 13 4249.26 253.447 32
 0 18 -13 3468.1 237.748 14
 0 18 14 443.645 85.554 41
 0 -18 -14 439.158 80.9157 66
 0 18 14 402.973 79.174 32
 0 -19 0 73.5443 65.9073 66
 0 19 0 12.1903 77.277 35
 0 19 0 96.7341 83.2028 41
 0 19 0 36.5306 85.26 15
 0 19 1 54.2295 81.4418 15
 0 19 -1 18.4229 88.5094 35
 0 -19 1 5.47889 57.9761 66
 0 19 -1 10.7621 76.7271 41
 0 -19 -1 -31.604 73.9875 59
 0 19 1 -35.3271 88.1092 41
 0 19 -1 42.672 87.8612 15
 0 19 1 53.9604 83.6109 35
 0 -19 -1 5.76702 62.2175 66
 0 19 2 456.065 102.104 35
 0 -19 -2 430.977 90.5381 66
 0 19 -2 368.426 102.58 35
 0 -19 -2 436.313 96.3734 59
 0 -19 2 388.18 79.8912 66
 0 19 -2 352.213 104.902 15
 0 19 2 361.488 101.679 15
 0 -19 2 363.343 93.5034 59
 0 19 2 437.179 106.512 41
 0 -19 3 5672.6 333.111 59
 0 -19 -3 5607.35 327.068 66
 0 -19 -3 5663.19 332.389 59
 0 19 3 5544.59 325.401 35
 0 19 3 5564.77 334.323 41
 0 -19 3 4340.66 298.871 66
 0 19 -3 5232.51 330.856 15
 0 19 -3 5658.27 339.196 35
 0 19 3 5561.74 328.607 15
 0 -19 -3 5271.14 312.428 46
 0 -19 -4 234.765 81.4302 59
 0 19 4 262.027 80.2854 35
 0 19 4 289.562 96.1354 41
 0 -19 -4 150.686 70.2418 66
 0 19 4 199.447 82.8688 15
 0 -19 4 172.073 80.7222 59
 0 -19 -5 2317.19 176.973 66
 0 -19 -5 2043.41 168.527 59
 0 19 5 1915.46 162.66 35
 0 19 5 2029.19 168.613 15
 0 -19 5 2144.79 172.251 59
 0 19 5 1865.81 173.041 41
 0 -19 -6 911.329 108.403 59
 0 19 6 755.622 100.777 15
 0 -19 6 778.884 102.517 59
 0 -19 -6 842.958 106.976 66
 0 19 -6 796.475 118.528 15
 0 19 6 697.099 113.926 41
 0 19 7 438.854 96.2203 41
 0 -19 -7 468.453 83.1588 66
 0 19 -7 489.529 93.6564 15
 0 -19 7 532.338 85.2999 59
 0 -19 -8 2114 164.935 66
 0 19 -8 2236.12 170.129 15
 0 19 8 2090.73 169.233 41
 -1 0 0 49.5899 40.3165 1
 1 0 0 25.939 33.8435 11
 -1 0 0 -7.20347 52.4922 4
 1 0 0 -17.0518 52.5441 4
 1 0 0 7.42207 34.9666 8
 1 0 0 1.51639 33.5158 7
 -1 0 1 51568.5 2334.15 2
 -1 0 -1 55052.5 2345.79 4
 -1 0 -1 54790 2331.16 7
 1 0 1 53893.5 2338.13 8
 -1 0 -1 52134.8 2325.79 11
 -1 0 -1 53595.8 2337.98 6
 -1 0 1 52414.4 2327.37 5
 1 0 1 53114.8 2340.41 1
 -1 0 -1 53020.3 2337.95 8
 1 0 -1 52456.3 2335.31 7
 1 0 -1 51009.4 2341.86 4
 -1 0 1 51898.2 2351.94 12
 1 0 -1 53260.9 2336.92 11
 -1 0 -1 59120.8 2345.23 1
 -1 0 1 54301.2 2329.61 1
 1 0 -2 20644 961.385 2
 1 0 2 21094.6 959.9 6
 -1 0 2 21124.7 965.485 3
 -1 0 -2 21984.4 966.526 8
 1 0 -2 21333 948.967 5
 1 0 2 21169.8 970.342 1
 -1 0 -2 22679.6 959.896 6
 -1 0 2 21664.4 963.336 2
 -1 0 -2 23414.6 974.133 1
 -1 0 3 3631.58 191.747 10
 1 0 3 3478.44 197.608 1
 -1 0 -3 3718.17 204.625 1
 -1 0 -3 3469.92 175.799 6
 -1 0 3 3548.32 163.89 1
 1 0 -3 3468.58 169.68 5
 1 0 -3 3556.84 188.283 2
 1 0 3 3777.63 180.993 6
 -1 0 -3 3510.08 194.625 8
 -1 0 3 3771.77 196.218 3
 -1 0 -3 3432.59 166.991 3
 1 0 -4 7598.53 382.649 2
 1 0 -4 7500.34 359.094 1
 -1 0 4 8204.47 384.492 10
 1 0 4 8336.27 373.313 6
 -1 0 -4 8335.87 394.954 8
 -1 0 4 8133.7 391.394 3
 -1 0 -4 8109.56 366.951 3
 -1 0 -4 8046.1 369.988 6
 1 0 4 7970.06 395.906 1
 -1 0 4 8149.04 361.179 1
 -1 0 -4 7981.25 396.541 1
 1 0 -5 11972.8 551.522 1
 1 0 -5 12588.9 582.995 2
 -1 0 -5 12463.6 588.049 8
 -1 0 5 12812.7 586.688 3
 1 0 5 11577.8 588.681 1
 -1 0 5 12311 595.718 12
 -1 0 -5 11721.5 558.041 9
 1 0 -5 11979.5 574.647 10
 -1 0 -5 12797 561.622 3
 1 0 5 12214.8 562.525 6
 -1 0 5 13074.4 576.717 10
 1 0 5 12043.2 557.968 3
 -1 0 5 12697.7 555.268 1
 -1 0 6 4785.63 259.938 12
 -1 0 6 3872.35 241.514 3
 1 0 -6 4148.78 208.173 1
 1 0 -6 4470.37 242.052 2
 1 0 6 4192.54 215.463 3
 -1 0 6 4259.88 212.769 1
 1 0 -6 3817.96 231.641 10
 1 0 6 4115.65 216.769 6
 -1 0 -6 4082.23 248.845 8
 -1 0 -6 4452.02 220.306 3
 -1 0 -6 4186.78 213.835 9
 -1 0 6 4264.48 235.527 10
 1 0 7 30753.7 1342.38 6
 -1 0 7 30667.6 1355.8 10
 -1 0 -7 29799.7 1338.13 9
 -1 0 -7 31641.5 1346.11 3
 -1 0 -7 25915.3 1363.05 8
 1 0 -7 30078.5 1333.21 1
 1 0 -7 30762.8 1365.68 2
 -1 0 7 31150.9 1370.47 12
 1 0 -7 29531.8 1354.38 10
 1 0 7 29280.9 1339.74 3
 -1 0 7 29742.6 1336.91 1
 -1 0 -8 514.626 76.9746 9
 -1 0 -8 704.003 84.9286 3
 1 0 -8 681.615 100.942 10
 1 0 -8 625.599 73.437 1
 1 0 8 618.944 78.2232 3
 1 0 -8 728.709 115.851 2
 -1 0 8 570.197 119.704 12
 -1 0 8 536.841 108.848 10
 1 0 8 615.28 82.8414 6
 -1 0 8 608.864 75.2568 1
 -1 0 9 25851.7 1155.06 1
 -1 0 9 26837 1184.51 12
 -1 0 -9 23624.5 1158.3 3
 1 0 -9 26571 1151.12 1
 1 0 -9 25998.2 1172.81 10
 -1 0 9 24082.9 1169.67 10
 1 0 -9 26153.1 1185.08 2
 1 0 9 24957 1157.6 3
 1 0 9 25322.2 1157.23 6
 -1 0 -9 25449.2 1152.64 9
 1 0 -10 2880.28 202.575 10
 -1 0 10 2616.47 186.544 9
 -1 0 -10 2805.67 209.748 1
 -1 0 -10 3366.6 203.788 10
 1 0 10 2538.71 178.368 3
 -1 0 10 2839.71 199.619 12
 1 0 -10 3011.6 175.654 1
 1 0 -10 2787.12 207.456 2
 1 0 10 2620.54 179.015 6
 -1 0 10 2821.57 177.574 1
 -1 0 -10 2672.54 173.598 9
 -1 0 10 2854.69 198.8 10
 -1 0 -11 6822.84 370.133 9
 -1 0 11 7280.76 377.511 1
 1 0 11 6923.23 375.062 6
 -1 0 11 7758.38 398.081 12
 1 0 -11 7076.22 389.778 10
 1 0 -11 7083.51 407.027 2
 -1 0 -11 7545.66 393.464 10
 -1 0 11 8145.64 400.966 10
 1 0 11 7210.13 378.864 3
 1 0 -11 7217.15 370.423 1
 1 0 11 6805.96 407.115 1
 -1 0 11 7293.84 392.471 9
 -1 0 -11 7093.78 405.741 1
 1 0 12 8177.18 464.812 1
 1 0 12 8894.32 442.594 6
 -1 0 12 8317.5 448.093 9
 1 0 -12 8250.68 429.026 1
 -1 0 -12 8468.9 468.004 1
 -1 0 12 7344.05 455.722 3
 1 0 -12 8184.73 451.13 10
 -1 0 12 8644.6 452.032 12
 1 0 -12 9226.93 456.594 8
 1 0 -12 8795.26 468.988 2
 1 0 12 8369.96 441.532 3
 -1 0 12 8091.4 433.362 1
 -1 0 -12 8319.8 452.326 10
 -1 0 12 9760.05 462.907 10
 1 0 13 14068.9 764.406 1
 1 0 13 15898.8 737.481 6
 1 0 -13 15026.8 751.165 10
 1 0 -13 15710.6 751.614 8
 -1 0 13 15163.1 743.731 9
 -1 0 -13 15645.1 765.665 1
 1 0 -13 15606.9 767.654 2
 -1 0 13 14534.3 740.576 12
 1 0 13 15173.1 737.027 3
 -1 0 -13 15448.6 780.185 8
 -1 0 13 14346.9 729.3 1
 -1 0 13 15403.1 767.286 3
 -1 0 -13 14086.5 742.22 10
 1 0 -13 15256.7 725.868 1
 1 0 14 1301.61 150.244 32
 -1 0 14 1813.8 148.56 34
 1 0 14 1617.28 144.051 6
 1 0 14 1639.5 150.293 3
 1 0 -14 1456.05 161.276 10
 1 0 -14 1412.81 153.341 66
 -1 0 14 1622.38 157.374 12
 -1 0 14 1481.81 164.092 3
 -1 0 -14 1563.97 148.599 39
 1 0 14 1611.58 153.004 70
 1 0 14 1659.15 174.044 1
 -1 0 14 1656.72 157.408 9
 1 0 -14 1622.82 160.183 8
 1 0 -14 1662.44 152.927 65
 -1 0 -14 1860.61 173.684 1
 -1 0 -14 1773.99 155.305 55
 -1 0 -14 1879.4 189.827 8
 -1 0 14 1792.18 153.61 64
 1 0 -14 1421.74 154.634 61
 -1 0 14 1658.57 146.134 1
 -1 0 -14 1625.28 164.214 10
 1 0 -14 1523.62 167.551 2
 1 0 -14 1766 145.001 1
 -1 0 -15 13258.1 692.748 10
 1 0 -15 13140.2 691.909 66
 1 0 -15 12523.1 682.9 10
 1 0 15 13428.6 685.529 73
 -1 0 -15 13202.5 681.489 39
 -1 0 15 13517 656.92 53
 -1 0 15 14056.5 650.994 34
 1 0 -15 13075.2 701.953 2
 1 0 15 13439.8 677.725 70
 -1 0 -15 13635.6 721.966 8
 1 0 -15 13466.5 686.804 8
 1 0 15 13837.3 676.115 6
 1 0 -15 14223.3 708.029 61
 -1 0 15 13033.6 668.13 1
 1 0 -15 13766.7 665.064 1
 -1 0 -15 13201.4 685.373 61
 1 0 -15 13457.8 694.041 18
 1 0 15 13119.1 707.198 1
 -1 0 -15 13430.3 687.2 55
 -1 0 15 13161 674.877 12
 1 0 -15 13586.4 685.693 65
 -1 0 15 12566.7 698.511 3
 -1 0 -15 13611.3 706.742 2
 1 0 15 12966.3 683.41 32
 1 0 15 13018.8 676.193 3
 -1 0 15 13615.5 664.78 64
 -1 0 15 12687.1 677.44 9
 1 0 -15 12722.2 684.507 19
 -1 0 -15 12997.3 698.077 1
 1 0 -16 6995.39 431.169 19
 -1 0 16 7151.24 409.525 64
 1 0 16 7446.98 427.99 73
 1 0 16 7241.89 419.406 70
 -1 0 -16 7781.56 450.424 1
 -1 0 16 6772.38 408.608 1
 1 0 16 6878.94 446.042 1
 1 0 -16 7278.77 444.737 61
 1 0 -16 7618.01 433.744 8
 -1 0 -16 7375.91 424.599 39
 1 0 -16 7476.31 438.392 66
 1 0 -16 7224.06 415.137 13
 -1 0 16 7380.48 448.421 3
 -1 0 -16 7630.34 434.11 55
 1 0 16 6493.23 411.487 3
 1 0 -16 7475.5 407.352 1
 1 0 16 7915.16 423.109 6
 1 0 -16 7304.48 437.458 18
 1 0 16 7634 407.836 56
 -1 0 -16 7779.86 454.08 2
 -1 0 -16 7600.07 438.858 10
 -1 0 16 7917.16 399.109 34
 -1 0 -16 7611.27 433.3 61
 1 0 -16 6878.64 428.275 10
 1 0 -16 6899.51 440.887 2
 -1 0 16 7268.08 423.703 9
 -1 0 -16 7793.79 468.499 8
 -1 0 16 7073.59 414.335 12
 1 0 -16 7663.78 431.947 65
 1 0 16 6923.14 423.395 32
 1 0 17 904.463 119.292 3
 -1 0 -17 1105.62 152.501 2
 1 0 17 778.776 125.762 70
 1 0 17 813.574 131.682 73
 -1 0 17 778.318 133.751 3
 1 0 -17 949.556 144.1 11
 -1 0 -17 1047.43 151.919 8
 1 0 17 993.102 122.437 56
 1 0 17 649.913 135.621 1
 1 0 -17 946.789 148.299 2
 -1 0 17 809.509 120.751 9
 -1 0 17 681.651 130.324 64
 1 0 -17 852.637 118.478 13
 1 0 -17 1029.13 144.433 66
 1 0 -17 711.886 120.004 65
 -1 0 -17 942.691 131.13 55
 -1 0 -17 724.3 133.418 65
 1 0 -17 858.569 147.839 61
 -1 0 17 855.392 140.937 22
 -1 0 -17 869.532 122.688 39
 -1 0 -17 897.324 131.869 61
 1 0 17 874.062 116.783 6
 1 0 -17 906.31 137.182 18
 -1 0 17 806.703 112.743 1
 1 0 -17 973.632 137.29 8
 1 0 17 703.08 111.732 41
 -1 0 -17 1024.5 144.556 1
 1 0 -17 849.638 111.497 1
 1 0 -17 814.441 134.77 10
 -1 0 17 852.12 118.226 12
 -1 0 17 759.56 130.213 34
 1 0 17 754.527 134.31 32
 -1 0 -17 833.869 138.273 10
 1 0 -17 742.732 129.577 19
 1 0 -18 1186.25 154.758 65
 1 0 -18 1263.82 154.554 8
 -1 0 18 1250.33 145.45 1
 -1 0 18 1503.97 160.722 34
 1 0 18 1380.03 161.052 70
 1 0 -18 1316.13 160.632 19
 1 0 18 1312.63 159.529 73
 1 0 -18 1466.85 169.507 66
 -1 0 -18 1525.14 181.655 2
 -1 0 18 1425.29 167.748 22
 1 0 -18 1403.61 172.124 18
 1 0 18 1374.81 146.179 56
 -1 0 -18 1624.36 173.45 55
 -1 0 18 1171.94 162.431 64
 1 0 -18 1220.3 146.059 13
 -1 0 18 1143.24 137.837 12
 -1 0 -18 1206.87 148.059 11
 -1 0 18 1361.95 158.008 56
 -1 0 -18 1365.71 180.342 18
 -1 0 -18 1319.82 158.05 39
 1 0 -18 1370.87 146.427 17
 1 0 -18 1254.02 136.26 1
 1 0 18 1243.16 142.351 6
 -1 0 -18 1517.67 166.228 61
 1 0 18 1294.28 148.704 3
 1 0 18 1267.51 167.944 32
 1 0 -19 3257.21 266.242 8
 1 0 -19 3386.27 276.587 19
 1 0 19 3298.95 251.859 6
 -1 0 -19 3801.06 275.622 39
 1 0 19 3137.63 255.549 3
 1 0 -19 3714.92 280.842 65
 1 0 -19 3433.64 276.477 66
 -1 0 19 3373.1 249.172 34
 -1 0 -19 3325.75 272.417 61
 1 0 -19 3634.48 288.369 18
 1 0 -19 3433.41 252.63 17
 1 0 19 3585.69 251.218 56
 1 0 19 3395.95 267.458 73
 -1 0 19 3288 261.292 22
 1 0 19 2881.14 260.411 32
 -1 0 -19 3340.69 263.539 11
 1 0 -19 3560.19 263.118 13
 -1 0 19 3493.32 267.602 64
 -1 0 -19 3416.81 274.484 55
 -1 0 19 3956.77 269.473 56
 -1 0 -19 3699.22 295.678 18
 1 0 19 3597.39 276.011 70
 1 0 -20 5752.52 393.292 65
 1 0 -20 5608.27 392.969 66
 1 0 -20 6300.67 406.223 19
 -1 0 20 5928.78 364.711 34
 -1 0 20 5677.91 378.483 22
 1 0 20 5846.33 390.462 73
 1 0 -20 6487.92 414.269 18
 -1 0 20 7060.59 393.666 56
 1 0 -20 5811.38 371.19 17
 -1 0 -20 6341.54 399.506 39
 -1 0 -20 5923.96 403.294 55
 1 0 20 5609.62 393.587 32
 1 0 20 5663.64 388.34 70
 1 0 -20 6054.47 383.867 13
 -1 0 -20 5053.63 398.005 18
 1 0 20 6035.19 369.033 56
 -1 0 -20 5729.32 397.856 61
 -1 0 21 417.081 155.635 34
 -1 0 21 695.568 143.3 56
 1 0 21 703.843 132.469 56
 1 0 -21 807.837 150.088 66
 1 0 -21 649.543 137.466 19
 1 0 21 584.118 160.47 70
 -1 0 -21 717.449 148.461 61
 1 0 21 761.795 153.763 32
 -1 0 21 735.69 166.571 22
 -1 0 -21 697.764 143.144 39
 1 0 -21 863.476 157.946 18
 -1 0 -21 585.888 144.855 55
 1 0 21 591.254 135.414 73
 1 0 -21 601.097 115.014 17
 1 0 -21 646.613 128.926 13
 -1 0 -22 8765.54 538.921 39
 1 0 22 8478.11 502.117 56
 -1 0 -22 8484.08 539.837 55
 -1 0 22 8488.5 514.801 22
 -1 0 22 9522.51 522.823 56
 1 0 22 8191.67 520.877 73
 1 0 -22 8619.32 505.274 17
 -1 0 22 8687.52 506.449 24
 1 0 -22 9034.58 547.43 19
 1 0 -22 8810.51 519.636 13
 1 0 22 8291.92 531.473 32
 -1 0 22 9837.6 479.123 28
 1 0 22 8259.57 531.415 70
 -1 0 22 9155.61 498.147 23
 -1 0 -22 9117.98 555.697 61
 1 0 -22 8586.37 537.491 66
 -1 0 22 7602.35 486.991 34
 1 0 -22 8818.33 549.813 18
 1 0 -23 48454 2336.36 17
 -1 0 23 48387.1 2337.53 22
 -1 0 23 50769.3 2335.25 24
 1 0 -23 48719.3 2352.2 13
 -1 0 23 54806.9 2354.59 56
 1 0 -23 50271.8 2385.52 19
 1 0 23 50378.8 2336.72 56
 1 0 -23 52052.4 2386.72 66
 1 0 -23 50647.9 2403.42 18
 1 0 23 47408 2354.61 73
 1 0 23 52653 2380.38 70
 -1 0 23 51208.5 2320.74 23
 -1 0 -23 52420.2 2398.49 61
 -1 0 24 31233.8 1415.82 56
 1 0 24 29409.7 1440.91 70
 1 0 -24 29180.4 1458.88 18
 -1 0 24 29607.1 1399.94 24
 -1 0 24 29411.7 1379.53 23
 -1 0 -24 29413.9 1456.8 61
 1 0 -24 27507.9 1392.63 17
 1 0 -24 28968.4 1448.41 19
 1 0 24 26026.4 1406.02 73
 1 0 24 28212.2 1394.38 56
 1 0 -24 28432.4 1409.69 13
 1 0 25 7068.34 454.329 56
 1 0 -25 7109.91 461.527 13
 -1 0 25 7140.73 451.197 24
 1 0 -25 7392.35 504.054 18
 -1 0 -25 7854.57 509.21 13
 1 0 25 7096.12 468.065 73
 -1 0 25 7703.88 474.901 56
 -1 0 -25 7935.58 510.9 61
 1 0 -25 6613.96 441.119 17
 -1 0 25 7179.69 437.691 23
 1 0 25 7393.72 498.584 70
 -1 0 25 6989.04 504.592 70
 -1 0 26 3929.01 369.113 70
 1 0 26 3748.74 341.057 70
 1 0 26 3776.16 307.933 73
 -1 0 -26 3989.27 352.354 13
 1 0 -26 3914.88 348.331 18
 -1 0 -26 3766.89 341.3 61
 -1 0 26 3571.41 283.038 23
 -1 0 26 3354.36 291.875 24
 -1 0 26 4167.99 327.921 56
 1 0 26 3769.69 298.803 56
 1 0 -26 3732.92 304.906 13
 -1 0 27 1744.4 226.03 56
 -1 0 -27 1358.11 210.017 61
 1 0 -27 1197.76 207.902 18
 1 0 27 1243.78 179.144 56
 1 0 -27 1263.07 175.927 13
 -1 0 27 1186.3 168.439 23
 1 0 27 1211.98 217.571 70
 -1 0 -27 1400.5 210.098 17
 -1 0 27 1423.25 187.001 24
 -1 0 27 1496.39 260.197 70
 -1 0 -27 1515.34 217.117 13
 -1 0 -28 6216.11 444.13 61
 1 0 28 5780.45 476.225 50
 -1 0 -28 5554.33 428.104 13
 -1 0 -28 5964.34 426.435 17
 -1 0 28 4859.58 348.183 23
 -1 0 28 5833.67 380.934 24
 -1 0 28 5352.98 443.343 70
 1 0 28 5864.26 436.193 70
 1 0 -28 5491.01 427.45 18
 -1 0 -28 4539.83 429.32 19
 -1 0 28 5770.78 401.145 56
 1 0 28 5095.83 372.379 56
 -1 0 -29 2078.59 266.035 19
 -1 0 29 1423.44 177.008 23
 1 0 29 2327.42 309.377 50
 -1 0 -29 1702.36 242.239 13
 -1 0 -29 1877.84 243.348 17
 1 0 -29 2197.11 257.795 18
 -1 0 -29 2078.95 249.812 61
 1 0 29 1362.01 192.219 56
 -1 0 29 1761.12 198.797 24
 1 0 -29 1644.51 253.3 61
 -1 0 29 2410.93 242.312 56
 1 0 29 2173.46 264.272 70
 1 0 29 1877.51 249.063 26
 -1 0 29 2034.59 286.559 70
 -1 0 -30 6982.5 488.167 61
 -1 0 30 7505.79 518.872 70
 1 0 30 7480.66 497.051 26
 -1 0 -30 6864.91 482.285 13
 1 0 -30 6588.76 499.069 61
 1 0 30 7219.66 490.607 70
 1 0 30 8054.18 549.334 50
 1 0 -30 7110.74 490.12 62
 -1 0 -30 6453.11 446.039 71
 1 0 30 6773.52 429.43 56
 -1 0 30 6267.8 419.633 24
 -1 0 30 6848.49 450.218 56
 -1 0 -30 7236.46 477.814 17
 -1 0 -31 7750.53 503.649 61
 -1 0 -31 7833.53 502.778 13
 -1 0 31 8152.8 482.63 56
 1 0 -31 8402.35 541.727 61
 -1 0 31 6647.79 436.171 24
 1 0 31 8059.66 551.741 50
 1 0 -31 7164.02 501.136 62
 1 0 31 7531.17 508.185 70
 -1 0 -31 6989.17 462.223 71
 -1 0 -31 7559.27 492.044 17
 -1 0 31 7785.25 532.425 70
 1 0 31 8230.24 516.329 26
 -1 0 -32 1718.02 211.526 13
 -1 0 32 2198.14 269.263 70
 1 0 32 1616.08 213.519 26
 1 0 -32 1710.12 229.73 61
 1 0 32 1421.23 235.135 50
 1 0 -32 1645.61 218.898 62
 -1 0 -32 1803.47 183.069 71
 -1 0 32 1687.46 200.727 56
 1 0 32 1846.84 230.28 70
 -1 0 -32 1725.33 206.957 61
 -1 0 -32 1687.24 199.702 17
 -1 0 -33 2073.65 219.689 61
 1 0 -33 1850.82 226.424 61
 -1 0 -33 1744.08 202.884 13
 1 0 33 2184.08 231.277 70
 -1 0 33 2328.98 260.996 70
 -1 0 33 2002.31 204.086 56
 1 0 33 2134.25 261.224 50
 -1 0 -33 1566.18 166.998 71
 1 0 -33 1869.62 205.575 72
 1 0 33 2255.85 221.236 26
 -1 0 33 1911.05 228.545 50
 -1 0 -33 2109.79 207.085 17
 1 0 -33 2063.27 227.227 62
 -1 0 -34 798.501 128.816 61
 1 0 -34 751.248 132.281 72
 1 0 34 754.245 171.765 50
 -1 0 34 817.463 153.305 50
 -1 0 -34 924.798 132.343 17
 -1 0 34 1190.29 188.414 70
 1 0 34 1079.15 163.668 70
 -1 0 34 768.992 131.135 56
 1 0 -34 1050.33 167.472 61
 1 0 -34 825.043 141.83 62
 1 0 34 1111.05 146.525 26
 -1 0 35 2624.27 204.196 56
 1 0 35 3395.11 270.57 50
 1 0 35 2909.57 234.171 70
 -1 0 35 3109.6 258.478 70
 -1 0 -35 2975.87 255.159 62
 1 0 -35 3188.5 255.881 61
 -1 0 35 3136.7 242.248 50
 1 0 -35 2873.75 234.683 62
 1 0 -35 2699.03 210.554 72
 -1 0 -35 3160.03 231.504 61
 -1 0 36 1931.67 183.332 70
 1 0 36 1827.15 159.989 70
 -1 0 -36 1759.48 175.726 62
 -1 0 36 1632.51 152.575 50
 1 0 36 2072.89 187.843 50
 1 0 -36 1798.98 173.4 61
 -1 0 -36 1494.2 140.898 61
 1 0 -36 1609.32 157.165 62
 1 0 37 2249.98 174.993 50
 -1 0 37 2323.23 181.312 70
 -1 0 -37 2173.54 175.619 62
 1 0 -37 2166.33 174.618 61
 1 1 -37 1031.56 112 61
 -1 1 37 1050.69 117.895 70
 1 1 -37 904.36 101.461 62
 -1 -1 -37 1033.28 112.959 62
 1 -1 36 2515.08 201.267 70
 -1 1 36 2804.48 218.287 70
 1 1 -36 2490.88 208.909 61
 -1 -1 -36 2569.4 212.275 62
 -1 -1 -36 2613.07 193.715 61
 1 1 -36 2431.74 197.26 62
 1 -1 36 2609.82 209.67 50
 -1 1 36 2456.7 202.678 50
 -1 -1 -35 6411.01 401.698 61
 1 -1 35 6625.18 423.836 50
 1 1 -35 6093.56 404.882 62
 1 -1 35 6820.48 413.445 70
 -1 1 35 7360.7 428.998 50
 1 1 -35 6764.46 421.296 61
 -1 1 35 7647.87 431.395 70
 1 1 -34 1852.86 215.264 61
 1 1 -34 1914.08 180.209 72
 1 1 -34 2182.96 218.416 62
 -1 1 34 2499.7 240.03 50
 -1 -1 -34 2425.32 209.526 13
 -1 -1 -34 2101.23 187.662 17
 1 -1 34 2398.23 229.873 70
 -1 -1 -34 2086.88 209.437 61
 -1 1 34 2037.32 180.157 56
 -1 1 34 2292.05 233.702 70
 -1 -1 -33 2646.58 227.197 17
 -1 1 33 2971.01 277.796 70
 1 1 -33 2836.97 260.417 62
 1 -1 33 2678.09 277.607 50
 1 1 -33 2236.49 217.184 72
 -1 -1 -33 2368.23 229.443 13
 -1 1 33 2326.36 211.794 56
 -1 -1 -33 2359.08 237.88 61
 1 1 -33 2639.78 261.444 61
 -1 -1 -33 2680.39 260.326 18
 1 -1 33 2609.42 260.74 70
 -1 1 32 4068.26 302.316 56
 -1 1 32 4731.01 368.195 70
 1 -1 32 4301.87 358.666 70
 1 -1 32 3784.4 293.654 56
 -1 -1 -32 4469.81 346.562 61
 -1 -1 -32 4020.59 325.532 13
 1 1 -32 4859.66 373.198 61
 1 -1 32 4418.86 327.02 26
 -1 -1 -32 3856.2 290.974 71
 -1 -1 -32 4355.37 323.381 17
 -1 -1 -32 4685.88 373.484 18
 1 -1 32 5291.28 399.336 50
 1 1 -32 4588.7 358.137 62
 1 1 -32 3741.72 310.523 72
 -1 1 31 57.5768 172.438 70
 -1 -1 -31 193.404 158.957 18
 1 -1 31 134.924 124.871 26
 1 1 -31 227.687 164.052 61
 1 -1 31 241.412 182.841 50
 -1 1 31 269.006 124.294 56
 1 -1 31 81.8135 163.111 70
 -1 -1 -31 109.028 117.048 13
 1 -1 31 111.396 120.116 56
 1 1 -31 203.59 147.661 62
 -1 -1 -31 62.5431 88.9962 71
 -1 -1 -31 179.456 125.919 61
 -1 -1 -31 160.171 147.424 19
 -1 -1 -31 163.783 121.904 17
 -1 -1 -30 5321.38 419.297 19
 1 -1 30 4960.81 383.328 26
 -1 -1 -30 5161.79 386.31 17
 -1 1 30 4866.97 356.131 56
 -1 -1 -30 5120.89 395.312 13
 1 -1 30 5505.64 418.866 70
 -1 1 30 5797.11 427.701 70
 1 1 -30 4361.79 398.39 61
 1 -1 30 5400.81 435.524 50
 -1 -1 -30 4802.95 421.457 18
 1 1 -30 4842.02 399.544 62
 -1 -1 -30 5420.85 414.429 61
 1 -1 30 4813.3 356.343 56
 1 -1 29 9568.11 636.17 50
 -1 1 29 7913.77 512.186 24
 -1 1 29 10303.7 626.745 70
 1 1 -29 9845.93 617.209 62
 -1 -1 -29 9885.26 613.47 61
 1 1 -29 9213.6 615.092 61
 1 -1 29 9437.86 592.828 26
 -1 -1 -29 9729.23 619.421 19
 1 -1 29 9597.48 614.486 70
 -1 -1 -29 9769.91 609.668 65
 -1 1 29 9066.39 549.267 56
 -1 -1 -29 9325.94 593.435 13
 1 -1 29 8696.97 550.63 56
 -1 -1 -29 9446.83 587.366 17
 -1 1 28 8957.33 549.79 56
 1 -1 28 9199.18 629.637 50
 1 -1 28 8865.17 553.449 56
 -1 1 28 9313.68 605.328 70
 -1 -1 -28 8710.88 593.791 61
 -1 -1 -28 9096.65 591.8 13
 -1 -1 -28 9821.23 617.76 19
 1 -1 28 9700.09 612.025 70
 1 1 -28 8883.72 609.272 61
 1 -1 28 9496.21 592.573 26
 -1 -1 -28 9994.49 609.136 65
 -1 1 28 8421.21 517.605 24
 1 -1 27 1748.47 212.781 56
 1 1 -27 1519.57 177.982 17
 1 -1 27 1748.04 257.494 70
 -1 -1 -27 1711.07 232.864 61
 -1 1 27 1925.56 223.11 56
 -1 1 27 1627.38 176.665 23
 1 1 -27 1272.88 234.023 61
 -1 1 27 1668.73 191.224 24
 -1 -1 -27 1929.99 256.258 65
 1 -1 27 1696.36 279.332 50
 -1 -1 -27 1608.11 251.846 19
 -1 -1 -27 1662.46 231.649 13
 -1 1 27 1832.72 273.982 70
 1 -1 27 1531.89 230.545 26
 1 1 -27 1762.27 239.819 18
 1 -1 26 7411.44 477.158 56
 -1 1 26 7459.8 470.324 56
 -1 1 26 7246.74 448.353 24
 -1 -1 -26 6890.05 504.708 61
 1 -1 26 7314.42 539.911 50
 1 1 -26 6481.48 446.07 17
 1 1 -26 7302.29 476.611 13
 1 -1 26 7981.15 528.613 70
 -1 -1 -26 6916.95 504.003 13
 -1 1 26 7142.5 515.902 70
 1 1 -26 7476.42 535.53 61
 -1 -1 -26 7670.84 524.973 19
 -1 1 26 7235.14 429.654 23
 1 1 -26 7689.11 522.654 18
 -1 -1 -26 8228.64 534.471 65
 -1 1 25 18966.5 948.494 70
 -1 1 25 15838.9 842.199 23
 -1 -1 -25 17326.8 942.56 61
 1 1 -25 15781.5 874.484 17
 1 1 -25 17961.5 962.055 61
 -1 -1 -25 17732.4 944.294 65
 -1 1 25 16740.7 866.13 24
 -1 1 25 17788.4 888.844 56
 1 1 -25 15732.7 891.812 13
 1 1 -25 17160.9 944.808 18
 -1 -1 -25 17185.6 953.297 19
 1 -1 25 17012 931.524 70
 1 -1 25 15854.2 881.869 56
 1 -1 24 21454.5 1117.94 70
 -1 1 24 20461.9 1070.25 22
 -1 -1 -24 20354.2 1116.13 55
 1 1 -24 20873.7 1088.12 13
 -1 1 24 21011.6 1054.07 24
 1 -1 24 21176.4 1054.93 24
 -1 -1 -24 20971.8 1114.08 65
 -1 -1 -24 22599.7 1134.25 61
 1 1 -24 21440.4 1127.82 18
 -1 1 24 21288.4 1036.85 23
 1 1 -24 21330.7 1143.48 61
 1 1 -24 20232.3 1066.44 17
 -1 1 24 23026.3 1128.77 70
 -1 1 24 23355.1 1081.45 56
 -1 -1 -24 20877.8 1132.41 19
 -1 -1 -24 21585.2 1113.94 39
 1 -1 24 19666.6 1066.35 56
 -1 -1 -23 1427.36 209.368 55
 -1 1 23 1250.78 209.022 22
 1 1 -23 1278.53 234.485 61
 1 -1 23 1440.11 226.56 70
 1 1 -23 1137.35 165.601 17
 1 1 -23 1296.43 207.827 18
 1 -1 23 1372.48 168.683 24
 -1 1 23 1301.51 165.982 23
 -1 -1 -23 1295.19 214.786 65
 -1 1 23 1267.11 181.665 56
 -1 1 23 1057.5 222.173 70
 -1 -1 -23 1033.82 183.347 39
 1 -1 23 1318.09 179.581 56
 -1 1 23 1244.4 206.526 34
 1 1 -23 1205.26 181.534 13
 -1 1 23 1437.42 175.835 24
 -1 -1 -23 1201.38 197.322 61
 1 -1 23 996.191 161.936 73
 -1 -1 -23 1404.99 223.661 19
 -1 1 22 5579.9 368.235 22
 -1 -1 -22 4951.83 392.665 19
 1 -1 22 4880.18 353.78 73
 -1 1 22 6195.15 363.805 56
 1 -1 22 5181.28 340.6 24
 1 1 -22 5311.09 398.208 18
 -1 -1 -22 4712.1 375.213 61
 -1 1 22 5078.27 390.946 70
 -1 -1 -22 5124.86 377.658 39
 1 -1 22 5208.08 385.929 70
 -1 1 22 4465.56 337.971 34
 1 1 -22 5234.55 365.693 13
 -1 -1 -22 4720.89 373.218 55
 1 -1 22 5266.04 355.701 56
 -1 -1 -22 5252.99 384.4 65
 1 1 -22 5391.59 357.639 17
 1 1 -22 4271.15 387.222 61
 1 1 -21 2032.35 220.918 19
 1 -1 21 1838.17 196.374 56
 1 -1 21 2039.35 203.556 73
 1 1 -21 1845.79 189.463 17
 1 1 -21 1849.09 215.078 18
 1 -1 21 2008.83 233.103 70
 1 -1 21 2060.27 190.293 24
 -1 -1 -21 2066.57 218.805 39
 -1 1 21 2029.3 235.237 70
 1 1 -21 1786.16 197.42 13
 -1 -1 -21 1742.54 214.288 55
 -1 -1 -21 1932.66 222.047 65
 -1 1 21 1748.83 209.25 22
 -1 -1 -21 1801.53 212.681 61
 -1 1 21 2169.04 205.445 56
 -1 1 21 1719.54 205.473 34
 1 1 -20 9148.89 540.99 17
 1 -1 20 9056.14 546.226 73
 -1 1 20 9688.84 578.208 70
 -1 1 20 10309.2 548.895 22
 -1 -1 -20 9951.81 575.203 39
 -1 1 20 9490.69 523.556 34
 -1 -1 -20 9546.95 575.647 61
 1 1 -20 9895.76 582.087 66
 1 -1 20 9585.82 542.121 56
 1 1 -20 9569.71 578.216 19
 -1 1 20 10702 551.215 56
 1 -1 20 10034.9 573.6 70
 1 1 -20 9416.17 555.639 13
 1 -1 20 10186.8 537.055 24
 1 1 -20 9672.21 584.838 18
 -1 -1 -20 9656.82 575.108 55
 -1 1 19 219.072 128.919 22
 1 1 -19 204.497 87.6522 8
 1 -1 19 304.206 108.64 56
 1 -1 19 313.553 97.7573 24
 1 1 -19 220.755 108.188 66
 -1 -1 -19 232.662 107.699 39
 1 1 -19 208.454 97.8911 13
 1 1 -19 245.329 95.6589 17
 -1 1 19 410.08 144.048 70
 -1 -1 -19 192.214 104.167 61
 1 -1 19 218.142 96.5557 73
 -1 1 19 319.772 131.065 34
 1 -1 19 320.29 126.989 70
 -1 -1 -19 217.864 116.047 55
 1 1 -19 318.845 117.169 18
 1 1 -19 129.729 97.9809 19
 -1 -1 -18 36286.9 1656.48 55
 1 1 -18 33066 1619.89 17
 1 1 -18 36349.6 1663.96 18
 1 1 -18 35784.7 1655.98 19
 1 -1 18 36273.1 1646.26 70
 1 1 -18 32734.1 1616.18 1
 -1 -1 -18 34527.5 1651.32 61
 1 1 -18 34444.5 1633.78 13
 -1 -1 -18 34345.6 1658.43 2
 1 1 -18 36579.7 1660.88 66
 1 -1 18 32202.5 1625.48 3
 -1 1 18 35456.7 1614.55 22
 -1 1 18 37330.3 1595.04 34
 1 -1 18 33676.2 1628.22 73
 -1 1 18 36110.8 1649.64 70
 1 -1 18 33739.1 1636.83 32
 1 -1 18 32238.7 1608.02 6
 1 1 -18 33901.1 1642.89 8
 -1 -1 -18 35301.7 1644.71 39
 -1 1 18 31556.5 1612.8 12
 1 -1 18 35060.1 1617.59 56
 1 -1 18 36609 1614.03 24
 1 1 -17 724.933 132.202 19
 -1 -1 -17 994.84 137.685 55
 -1 1 17 702.001 113.486 1
 1 1 -17 881.522 140.708 18
 -1 1 17 812.852 137.814 3
 1 1 -17 843.536 117.33 17
 1 -1 17 1116.17 158.55 1
 1 1 -17 815.276 120.19 13
 -1 -1 -17 847.279 136.942 10
 1 1 -17 874.524 129.813 8
 -1 -1 -17 1076.65 138.004 39
 -1 -1 -17 887.034 143.025 8
 -1 1 17 974.946 138.993 22
 1 -1 17 939.876 112.774 6
 1 1 -17 772.926 109.581 1
 -1 1 17 929.031 132.227 34
 -1 1 17 895.192 136.96 53
 -1 1 17 957.764 128.929 9
 1 -1 17 887.362 124.436 56
 1 -1 17 750.965 124.591 73
 1 -1 17 870.37 115.954 24
 -1 -1 -17 732.41 127.048 2
 1 -1 17 864.813 118.276 3
 1 -1 17 780.376 133.632 32
 -1 1 17 1055.48 162.817 70
 1 1 -17 974.431 149.09 2
 -1 -1 -17 971.736 140.06 1
 1 -1 17 868.399 143.395 70
 -1 -1 -17 867.807 128.997 61
 1 1 -17 847.972 133.11 10
 -1 1 17 726.866 113.444 12
 1 1 -17 782.948 140.94 11
 1 1 -17 966.998 144.019 66
 1 1 -16 2252.28 191.176 17
 1 1 -16 2653.32 196.059 1
 1 1 -16 2602.49 229.42 2
 -1 1 16 2467.27 203.214 9
 -1 -1 -16 2527.94 219.226 2
 -1 -1 -16 2652.84 223.025 1
 1 -1 16 2418.94 181.066 23
 -1 -1 -16 2624.9 212.83 39
 -1 -1 -16 2926.34 222.194 10
 -1 -1 -16 2444.49 232.061 8
 -1 1 16 2346.84 220.612 3
 1 -1 16 2632.76 194.526 24
 -1 -1 -16 2225.34 182.943 38
 1 -1 16 2131.84 219.713 1
 1 1 -16 2552.5 212.947 10
 1 -1 16 2403.47 187.327 6
 1 -1 16 2650.4 201.102 56
 1 1 -16 2605.92 231.063 11
 1 1 -16 2456.46 217.09 18
 1 1 -16 2367.8 206.49 8
 1 -1 16 2355.5 207.127 70
 -1 -1 -16 2657.37 216.285 61
 1 1 -16 2504.93 209.055 65
 -1 1 16 2295.47 190.274 1
 1 1 -16 2649.21 222.953 66
 1 -1 16 2412.19 195.544 3
 -1 1 16 2308.51 183.187 27
 1 -1 16 2464.54 205.322 73
 1 1 -16 2546.84 215.953 19
 -1 1 16 2601.85 203.809 12
 1 -1 16 2473.09 212.751 32
 1 1 -16 2313.57 199.373 13
 -1 1 16 2519.31 221.561 70
 -1 1 16 2888.99 209.481 22
 -1 1 16 2835.6 194.432 34
 -1 -1 -16 2600.3 212.752 55
 -1 1 16 2771.56 207.459 53
 1 -1 15 26358.8 1268.22 32
 1 -1 15 26869.7 1266.44 70
 1 1 -15 26712.8 1262.55 13
 -1 1 15 27279.1 1246.65 22
 -1 1 15 28284.7 1230.25 34
 -1 -1 -15 27862.3 1272.36 39
 -1 -1 -15 27073.7 1273.41 55
 1 1 -15 26297.5 1276.22 19
 1 1 -15 26852.5 1281.65 18
 1 -1 15 26186.9 1253.6 3
 1 1 -15 26177.8 1298.52 11
 -1 1 15 24737.7 1243.59 1
 -1 -1 -15 25303 1273.11 2
 -1 -1 -15 27737.7 1302.6 8
 1 -1 15 27025.5 1245.05 6
 1 1 -15 26315.7 1289.67 2
 -1 -1 -15 25662.9 1281.76 1
 -1 1 15 26038.5 1285.72 3
 -1 1 15 25164.8 1257.46 9
 -1 1 15 25314.1 1256.7 12
 1 1 -15 27328.6 1249.94 1
 1 -1 15 25755.6 1290.29 1
 1 -1 15 27536.8 1251.24 56
 1 1 -15 26030.1 1280.42 66
 -1 -1 -15 27174.4 1274.87 61
 -1 1 15 28265.7 1247.18 53
 -1 -1 -15 27116.6 1269.52 10
 1 1 -15 25436.8 1264.27 10
 1 1 -15 26202.1 1270.11 65
 1 1 -15 27839 1273.19 8
 -1 1 14 10105.2 533.415 22
 1 1 -14 10625.3 534.97 1
 -1 1 14 10018.8 566.178 3
 -1 -1 -14 10595.1 553.121 10
 1 1 -14 10493.8 554.994 65
 -1 1 14 9953.15 548.213 12
 -1 -1 -14 10564.8 555.526 55
 1 1 -14 10668.8 556.474 8
 -1 1 14 9966.15 531.874 1
 1 1 -14 11020.1 569.82 66
 -1 -1 -14 10235.1 548.968 39
 -1 -1 -14 11171.7 561.704 61
 1 -1 14 10004.5 546.939 70
 -1 -1 -14 10831.5 564.172 2
 1 -1 14 10632.9 531.793 6
 -1 -1 -14 10474.3 568.913 1
 -1 1 14 11432.3 537.997 53
 1 1 -14 10237.9 560.357 18
 1 1 -14 9905.89 555.547 19
 -1 1 14 10704.1 550.036 9
 1 1 -14 10225.4 548.544 10
 1 -1 14 9078.92 563.59 1
 1 1 -14 10445.2 570.511 2
 -1 1 14 11157.4 522.885 34
 1 -1 14 10062.4 537.468 3
 1 1 -14 10467.4 577.482 11
 -1 -1 -13 33690.5 1534.95 10
 1 1 -13 32720.8 1532.15 8
 1 -1 13 32711.7 1555.94 1
 -1 1 13 32629.8 1528.09 9
 -1 -1 -13 33737.6 1519.86 9
 -1 1 13 30023.7 1541.97 3
 -1 1 13 32611.6 1535.1 12
 1 1 -13 33283.9 1554 2
 -1 1 13 33451.2 1517.86 1
 1 1 -13 34263.1 1564.83 11
 -1 -1 -13 34573.9 1545.35 2
 1 1 -13 31827.6 1531.56 10
 -1 -1 -13 33801.1 1532.64 3
 1 1 -13 33570.4 1516.66 1
 -1 -1 -13 33503.7 1551.15 1
 1 -1 13 34535.3 1514.74 6
 1 -1 13 31875.9 1517.5 3
 -1 1 12 37078.3 1663.68 12
 1 -1 12 35654.1 1677.93 1
 1 -1 12 36177.5 1642.19 3
 1 1 -12 36156 1655.23 10
 -1 1 12 33028 1645.79 9
 1 -1 12 36764.8 1635.61 6
 -1 1 12 34386 1636.73 1
 1 1 -12 38289.8 1642.13 1
 1 1 -12 32803.4 1671.62 11
 -1 -1 -12 36452.9 1673.51 1
 -1 -1 -12 37995.5 1668.37 2
 -1 -1 -12 36790.6 1656.02 3
 -1 -1 -12 37207.8 1644.18 9
 1 1 -12 36410.9 1653.6 8
 1 1 -12 37057.2 1677.59 2
 -1 -1 -12 35591 1654.05 10
 -1 -1 -11 6961.88 386.798 1
 1 1 -11 6546.44 358.806 8
 1 -1 11 6954.57 344.397 6
 -1 -1 -11 5837.81 356.554 10
 -1 1 11 6405.53 347.45 1
 1 1 -11 6816.15 382.709 2
 -1 -1 -11 6687.08 358.684 3
 -1 1 11 6987.25 378.364 12
 1 -1 11 6780.65 351.717 3
 1 1 -11 6402.69 361.367 10
 1 1 -11 6504.88 344.876 1
 -1 -1 -11 7072.12 373.222 2
 -1 -1 -11 6748.26 351.188 9
 1 -1 11 5594.18 370.619 1
 -1 1 10 62909.7 2700.72 12
 1 -1 10 61349.6 2672.06 3
 -1 1 10 61459.4 2670.53 1
 -1 -1 -10 59114.7 2702.42 1
 1 1 -10 57483.5 2679.71 10
 -1 -1 -10 61900.7 2681.23 3
 1 1 -10 62750.7 2670.89 1
 1 1 -10 57088.2 2676.07 8
 -1 -1 -10 53860.5 2674.35 10
 -1 -1 -10 60831.9 2673.79 9
 -1 -1 -10 63157.1 2691.85 2
 1 -1 9 87140.3 3858.37 6
 -1 -1 -9 91367.3 3883.94 2
 1 1 -9 86442.4 3875 10
 -1 1 9 88957.5 3895.12 12
 -1 -1 -9 86837.9 3895.13 1
 1 1 -9 83544.9 3870.04 8
 -1 -1 -9 89313.4 3873.77 3
 1 1 -9 92165.9 3865.09 1
 -1 -1 -9 88698.3 3867.32 9
 -1 -1 -9 88705.9 3874.76 10
 1 -1 9 89049.5 3864.6 3
 -1 1 9 82057.5 3859.16 1
 -1 -1 -8 117874 5057.19 9
 -1 1 8 105397 5076.23 3
 -1 -1 -8 112365 5061.56 3
 1 1 -8 101671 5079.37 12
 1 1 -8 124050 5055.37 1
 -1 -1 -8 123704 5073.15 2
 1 1 -8 121736 5062.44 8
 1 -1 8 117697 5053.75 3
 1 -1 8 117214 5048.1 6
 -1 1 8 113741 5084.31 12
 -1 1 8 96927.6 5044.66 1
 -1 -1 -8 128575 5068.63 10
 1 1 -8 120912 5067.69 10
 -1 -1 -7 423327 15859.6 10
 1 -1 7 314361 15865.6 1
 1 1 -7 387634 15850.2 8
 1 1 -7 369637 15856.5 10
 -1 1 7 309401 15852.4 9
 -1 1 7 372813 15874.6 3
 -1 -1 -7 381001 15853 3
 -1 -1 -7 362603 15848.7 9
 1 -1 7 381475 15839.5 6
 1 1 -7 380294 15845.6 1
 -1 1 7 333119 15871.4 12
 -1 1 7 342187 15839 1
 1 1 -7 326633 15872.4 12
 1 -1 7 377135 15844.6 3
 1 -1 6 18546.9 850.887 1
 1 1 -6 17187.7 830.452 10
 1 1 -6 17671.1 845.692 11
 1 1 -6 18968 822.326 8
 -1 -1 -6 17935.7 826.455 9
 -1 1 6 18755.9 850.402 2
 1 1 -6 15611.9 848.606 12
 -1 1 6 18763.6 849.454 3
 -1 1 6 18062.8 834.71 9
 1 -1 6 17369.5 812.056 6
 1 1 -6 19146.4 821.218 1
 1 -1 6 19175 819.04 3
 -1 1 6 18046.7 813.602 1
 -1 -1 -6 18220.4 825.93 3
 1 1 -5 111825 4729.51 8
 1 -1 5 108610 4727.83 3
 1 1 -5 104499 4756.47 11
 -1 1 5 103369 4747.23 9
 -1 -1 -5 108685 4740.57 6
 1 -1 5 110651 4759.82 8
 1 -1 5 104113 4724.35 6
 -1 1 5 111549 4758.18 3
 1 1 -5 110851 4742.11 10
 1 -1 5 109642 4758.42 1
 -1 1 5 113891 4758.15 2
 1 1 -5 105069 4732.1 1
 -1 -1 -5 109156 4737.63 3
 1 -1 4 43946.6 1918.97 8
 1 1 -4 41445.3 1900.2 10
 -1 -1 -4 42640.2 1898.25 3
 -1 1 4 43842.9 1914.77 2
 -1 -1 -4 44049 1904.37 6
 -1 1 4 43043.3 1906.39 9
 1 -1 4 41352.9 1885.48 6
 1 -1 4 42266.6 1915.57 1
 1 -1 4 43996.9 1886.54 3
 -1 1 4 40473.4 1913.35 3
 1 1 -4 42764.4 1886.53 8
 -1 -1 -4 47705.3 1899.6 2
 1 1 -4 42555.5 1915.43 11
 1 1 -3 48990.2 2189.85 11
 -1 1 3 49076.5 2189.04 2
 -1 -1 -3 50466.8 2184.13 6
 -1 -1 -3 52183.7 2170.33 2
 -1 1 3 48008.2 2187.48 3
 1 -1 3 47387.2 2191.63 8
 1 -1 3 51381.7 2160.97 3
 -1 -1 -3 47752.9 2192.22 1
 -1 -1 -3 49036.4 2162.18 12
 1 -1 3 49969.8 2191.1 1
 1 -1 3 47158.1 2163.45 6
 -1 -1 -2 188424 8505.72 1
 -1 -1 -2 202186 8504.14 6
 -1 1 2 191537 8503.92 2
 -1 1 2 185089 8493.67 5
 1 -1 2 199357 8503.84 1
 -1 -1 -2 193594 8480.16 2
 -1 -1 -2 200500 8487.05 12
 -1 1 2 196462 8500.66 3
 1 1 -2 191911 8504.72 11
 1 1 -2 198123 8512.33 12
 1 -1 2 197110 8507.72 8
 1 1 -1 87489.2 3447.11 12
 -1 1 1 74223.4 3430.51 5
 -1 -1 -1 76601.1 3439.3 6
 1 -1 1 85756.6 3434.97 1
 1 1 -1 77214 3435.35 11
 -1 1 1 80705.9 3429.06 3
 -1 1 1 76753.3 3437.16 7
 -1 -1 -1 76901.4 3426.27 4
 -1 -1 -1 79922.2 3438.1 1
 -1 -1 -1 79792.4 3427.81 12
 1 1 -1 73714.7 3425.21 4
 -1 1 1 76829.4 3417.79 1
 1 -1 1 77625.4 3416.24 3
 1 1 -1 80987.1 3421.6 2
 -1 -1 0 89881.3 3969.21 12
 -1 1 0 88489.6 3960.15 1
 -1 1 0 94408.7 3971.17 5
 1 -1 0 95060.5 3962.93 1
 1 -1 0 90153 3959.6 3
 -1 -1 0 91077.5 3968.81 11
 -1 -1 0 87478.8 3976.09 6
 -1 1 0 90833.1 3971.96 7
 1 -1 0 83108.5 3976.81 4
 1 1 0 95085.5 3974.88 12
 1 -1 -1 86506.9 3494.48 1
 -1 1 -1 79695.7 3505.03 1
 1 1 1 89646.3 3509.72 12
 -1 -1 1 79476.7 3510.68 11
 -1 1 -1 76975.9 3510.94 5
 1 -1 -1 68791 3512.98 4
 1 1 1 74009.1 3511.91 6
 1 -1 -1 81452.6 3504.76 3
 1 -1 -1 74878.3 3510.53 7
 1 -1 -1 75812.5 3505.6 5
 -1 -1 1 83495 3514.1 12
 1 -1 -2 192252 8388.98 3
 -1 1 -2 186326 8368.16 6
 1 1 2 210813 8380.05 12
 -1 -1 2 190870 8394.8 12
 -1 -1 2 192813 8379.26 10
 1 -1 -2 185577 8392.43 7
 1 -1 -2 187364 8382.51 5
 -1 -1 2 187166 8391.47 11
 1 1 2 201431 8393.44 6
 -1 1 -2 195449 8388.94 1
 1 -1 -3 49813.1 2159.9 5
 -1 1 -3 48793.6 2169.52 1
 -1 -1 3 50415.5 2157.42 10
 -1 1 -3 46891 2141.92 9
 -1 -1 3 50187.2 2155.42 1
 1 1 3 50852.4 2147.45 12
 1 -1 -3 48755.6 2169.72 3
 1 1 3 49692.6 2167.08 6
 -1 1 -4 41141.5 1873.1 11
 -1 1 -4 40925.3 1872.09 9
 1 1 4 44822.4 1897.3 6
 1 -1 -4 42092.3 1903.34 3
 1 -1 -4 44318.9 1888.98 5
 -1 -1 4 45462.4 1890.71 10
 1 1 4 42737 1907.17 1
 -1 -1 4 43904.7 1884.69 1
 -1 1 -4 41846.3 1903.07 8
 -1 1 -4 44824.2 1905.94 1
 1 -1 -4 42970.3 1868.84 1
 -1 -1 5 109880 4689.91 10
 -1 1 -5 109093 4706.58 1
 -1 -1 5 114002 4683.88 1
 1 -1 -5 109268 4705.19 3
 -1 1 -5 105500 4674.66 11
 1 -1 -5 105292 4669.43 1
 -1 1 -5 109467 4672.56 9
 1 1 5 106536 4690.98 6
 1 -1 -5 104236 4700.41 2
 -1 1 -5 93969 4700.29 8
 1 -1 -6 17466.3 797.225 1
 -1 -1 6 16073.5 814.458 10
 -1 -1 6 19974.8 838.859 12
 1 -1 -6 17741.8 830.78 2
 -1 1 -6 15009.2 826.433 1
 1 1 6 16415.3 815.029 6
 1 -1 -6 18291.5 833.756 3
 -1 1 -6 18533 799.771 9
 -1 -1 6 18159.4 809.338 1
 -1 1 -6 18734.7 804.958 11
 -1 1 -6 18561.2 794.427 12
 -1 -1 7 375818 15980.7 12
 1 -1 -7 365780 15978.7 2
 -1 1 -7 375780 15939.7 12
 1 -1 -7 359831 15945.6 1
 1 -1 -7 363824 15983.4 3
 1 1 7 363668 15962.8 6
 -1 -1 7 365778 15965.9 10
 -1 1 -7 383327 15955.8 11
 1 -1 -7 314334 15964.9 10
 -1 -1 7 378690 15957.9 1
 1 -1 -8 110497 5106.02 1
 -1 -1 8 111875 5117.89 1
 1 -1 -8 100845 5126.49 10
 -1 1 -8 119476 5099.61 12
 1 1 8 115381 5124.55 6
 -1 -1 8 125379 5143.45 12
 1 -1 -8 115385 5145.59 3
 -1 -1 8 134089 5134.23 10
 -1 1 -8 121783 5120.09 11
 1 -1 -8 116715 5142.22 2
 1 1 9 88094.4 3886.5 6
 1 -1 -9 86385.1 3868.51 1
 -1 -1 9 87661.8 3880.88 1
 1 -1 -9 74512 3886.4 10
 -1 1 -9 90519.6 3884.52 11
 -1 1 -9 92727.7 3859.7 12
 -1 -1 9 104718 3898.77 10
 -1 -1 9 92779.8 3901.37 12
 1 -1 -9 74532.8 3898.16 3
 1 -1 -9 85789.8 3903.87 2
 1 1 10 60400.3 2595.94 6
 -1 -1 10 57218.1 2584.89 1
 1 1 10 59662.6 2625.5 1
 -1 -1 10 61059.4 2603.55 12
 -1 1 -10 57858.6 2562.09 12
 -1 1 -10 60185.5 2590.76 11
 1 -1 -10 57703.5 2574.16 1
 1 -1 -10 50300.1 2592.47 10
 1 -1 -10 60471.5 2615.83 2
 -1 -1 11 6482.14 349.639 12
 -1 1 -11 5176.09 368.153 8
 -1 -1 11 5996.83 361.281 3
 -1 1 -11 5764.96 360.576 1
 1 -1 -11 5887.18 351.799 10
 1 -1 -11 6639.51 367.284 2
 1 1 11 6765.28 345.167 6
 1 1 11 6037.02 366.666 1
 -1 -1 11 6087.51 334.356 1
 -1 -1 11 6812.37 354.825 9
 1 -1 -11 6367.47 324.912 1
 -1 1 -11 5963.36 336.619 11
 -1 1 -12 30796.3 1668.16 8
 -1 -1 12 37282.5 1643.31 1
 -1 -1 12 37427.3 1654.43 9
 -1 1 -12 33919.3 1641.74 11
 -1 -1 12 35968.9 1647.54 12
 1 -1 -12 35651.1 1669 2
 1 -1 -12 31665.8 1647.39 10
 -1 -1 12 36662.8 1672.11 3
 1 1 12 37790.7 1649.69 6
 -1 1 -12 37067.8 1672.88 1
 -1 1 -12 41431.5 1667.5 10
 1 1 12 37339.1 1680.15 1
 1 -1 -12 35864.7 1626.45 1
 1 -1 -13 30002.2 1510.29 10
 -1 -1 13 33529.5 1512.94 9
 -1 1 -13 32666.7 1507.86 11
 -1 1 -13 28788 1533.76 8
 -1 1 -13 35376.5 1519.9 10
 1 1 13 34448.3 1511.02 6
 1 -1 -13 32645 1486.02 1
 -1 -1 13 32599.3 1501.73 1
 -1 -1 13 33136.2 1534.37 3
 -1 -1 13 32399 1505.67 12
 -1 1 -13 32676.3 1530.28 1
 1 -1 -13 32891 1530.51 2
 1 1 13 32287.2 1536.16 1
 -1 -1 14 10885.4 525.631 22
 1 1 14 10043 544.5 32
 1 1 14 9915.47 563.535 1
 1 1 14 11016 552.994 73
 -1 -1 14 11071.1 546.278 70
 1 -1 -14 9087.25 542.566 10
 1 -1 -14 10249 547.31 39
 -1 1 -14 10364.1 542.926 11
 1 -1 -14 9239.45 555.697 2
 1 -1 -14 10658.1 560.694 61
 1 -1 -14 10340.2 520.348 1
 -1 1 -14 10024.9 547.394 10
 -1 1 -14 10674.6 549.334 65
 -1 1 -14 10503.1 583.079 8
 1 -1 -14 10192.5 550.651 55
 1 -1 -14 10032.8 549.36 66
 1 1 14 10212.1 540.642 6
 -1 -1 14 9864.21 560.777 3
 -1 -1 14 10712 546.569 9
 -1 1 -14 9700.33 555.244 1
 -1 -1 14 10480 537.199 1
 -1 -1 14 10387 536.876 12
 -1 1 -14 10151 558.121 18
 -1 -1 14 10267.9 521.233 64
 1 1 15 26881.3 1256.14 32
 -1 -1 15 26923.4 1225.7 64
 1 -1 -15 22333.4 1254.94 2
 -1 1 -15 27341.2 1258.98 65
 1 -1 -15 22862.7 1248.36 10
 1 -1 -15 26707.6 1258.52 18
 -1 -1 15 27485.8 1252.49 70
 1 -1 -15 28021.1 1275.43 61
 -1 1 -15 23355.8 1247.33 10
 -1 1 -15 26859 1257.4 61
 1 1 15 26253.2 1236.02 70
 1 1 15 26573.5 1249.41 6
 -1 1 -15 28104.7 1276.15 18
 -1 1 -15 26017.6 1244.94 39
 -1 1 -15 27404.8 1300.67 8
 1 -1 -15 26523 1248.25 65
 -1 1 -15 26150.3 1270.79 1
 1 -1 -15 25706.7 1259.73 55
 -1 -1 15 26954.2 1251.96 9
 -1 1 -15 26696 1267.74 19
 -1 -1 15 25169.8 1272.18 3
 -1 -1 15 25750.9 1237.47 12
 1 -1 -15 27444.7 1227.65 1
 -1 -1 15 25430.5 1238.2 1
 1 1 15 27121.2 1282.16 1
 1 -1 -15 25677.5 1255.89 66
 -1 1 -15 28359.9 1258.15 11
 -1 -1 15 26343.6 1224.56 22
 -1 1 -15 27432.8 1256.88 55
 1 1 15 25850.6 1254.01 73
 1 -1 -15 25966.4 1250.22 19
 1 -1 -16 2728.9 217.969 8
 -1 1 -16 2787.22 215.661 11
 1 -1 -16 2537.42 187.383 1
 1 -1 -16 2601.97 212.444 19
 -1 1 -16 2638.61 212.372 55
 -1 -1 16 2418.23 195.54 64
 -1 1 -16 2548.6 224.313 18
 -1 1 -16 2567.76 220.472 19
 1 1 16 2737.53 187.527 56
 1 1 16 2663.38 205.448 70
 -1 1 -16 2494.48 203.444 39
 1 1 16 2442.59 198.299 41
 -1 -1 16 2304.43 194.518 12
 -1 1 -16 2686.1 215.445 65
 -1 -1 16 2236.06 218.797 3
 1 1 16 2941.54 216.347 6
 1 -1 -16 2014.36 207.418 10
 1 -1 -16 3117 229.927 55
 -1 -1 16 2396.82 203.474 9
 -1 -1 16 2310.99 198.258 1
 -1 -1 16 2574.37 215.915 70
 1 1 16 2333.84 211.268 32
 -1 1 -16 2274.73 214.501 1
 1 1 16 2471.27 228.373 1
 1 -1 -16 2345.83 207.703 66
 -1 1 -16 2676.73 244.153 8
 -1 1 -16 2731.05 216.767 61
 -1 1 -16 2538.62 218.992 10
 1 -1 -16 2594.18 207.33 65
 1 -1 -16 2510.6 211.481 18
 1 1 16 2472.72 212.374 73
 1 -1 -16 2433.17 218.104 61
 1 -1 -17 875.455 141.904 61
 -1 -1 17 759.066 114.843 12
 1 1 17 862.26 124.254 6
 -1 1 -17 822.945 123.019 55
 -1 1 -17 753.004 135.618 10
 1 -1 -17 840.972 130.932 19
 -1 1 -17 793.857 136.545 19
 1 1 17 869.779 123.128 70
 1 -1 -17 924.994 134.612 18
 1 1 17 654.002 127.484 32
 -1 -1 17 984.947 145.181 3
 1 -1 -17 832.836 145.269 10
 -1 1 -17 994.841 127.473 39
 1 -1 -17 856.543 125.59 65
 -1 -1 17 814.692 130.139 64
 1 -1 -17 814.821 134.004 66
 1 -1 -17 707.4 119.903 8
 1 1 17 940.328 111.891 56
 -1 -1 17 1067.23 139.282 56
 -1 1 -17 963.595 146.102 18
 -1 1 -17 1002.2 136.419 61
 1 1 17 673.036 116.396 41
 -1 -1 17 675.004 114.47 1
 -1 1 -17 865.575 134.008 65
 1 1 17 921.418 145.341 1
 1 -1 -17 739.03 107.12 1
 1 1 17 863.065 141.841 73
 -1 -1 17 929.076 127.516 9
 -1 -1 17 815.291 143.294 70
 -1 1 -17 977.387 131.732 11
 -1 1 -17 960.804 158.447 8
 -1 1 -17 928.546 141.748 1
 1 -1 -18 34786.9 1679.63 61
 1 -1 -18 34708.2 1667.65 66
 -1 -1 18 38854.6 1646.87 56
 1 1 18 35163.5 1657.92 73
 -1 1 -18 35571.4 1677.69 19
 -1 1 -18 37061.7 1672.17 61
 -1 1 -18 37328.7 1672.61 65
 -1 -1 18 30635.2 1635 1
 -1 -1 18 30212.8 1621.08 12
 1 1 18 34417 1651.51 6
 1 1 18 36346.1 1620.09 56
 -1 1 -18 36146.3 1665.95 55
 1 1 18 35553.5 1644.89 70
 1 -1 -18 33191.5 1632.72 13
 -1 1 -18 34502.9 1657.14 11
 -1 1 -18 35517.2 1654.86 39
 1 -1 -18 35753 1655.99 65
 1 -1 -18 36394.8 1666.32 19
 -1 -1 18 35107.1 1653.64 70
 1 1 18 35343.5 1660.52 32
 -1 1 -18 36811.7 1688.34 18
 1 -1 -18 36058 1671.74 18
 1 1 18 33143.8 1629.96 41
 1 -1 -18 35769 1669.37 8
 1 1 19 271.939 121.664 32
 1 -1 -19 268.332 124.089 61
 -1 -1 19 348.783 127.639 56
 -1 1 -19 236.148 94.3933 55
 1 -1 -19 165.053 99.5267 18
 -1 1 -19 221.131 103.886 39
 -1 1 -19 310.539 119.452 65
 1 -1 -19 166.144 88.3586 13
 1 1 19 428.39 97.5057 56
 -1 1 -19 330.712 111.705 61
 1 1 19 185.469 107.876 73
 1 -1 -19 208.774 105.624 19
 -1 1 -19 298.239 128.385 19
 -1 -1 19 227.357 143.579 70
 1 1 19 210.105 109.84 70
 -1 1 -19 339.352 119.815 18
 1 -1 -19 180.864 97.3617 65
 1 -1 -19 242.223 112.114 66
 -1 1 -20 10407.2 575.442 61
 1 -1 -20 9666.32 572.093 18
 1 -1 -20 9212.28 533.439 13
 -1 1 -20 8989.56 573.558 19
 1 1 20 9142.3 558.08 32
 1 -1 -20 9707.55 583.564 61
 1 -1 -20 9204.77 551.818 65
 1 1 20 9191.75 553.071 73
 1 1 20 9575.37 549.899 70
 -1 1 -20 9457.11 579.089 18
 -1 1 -20 9797.22 572.311 65
 1 1 20 9493.8 518.103 56
 1 -1 -20 8928.57 554.997 66
 1 -1 -20 9759.86 565.187 19
 -1 -1 20 10571.2 552.122 56
 -1 1 -21 1995.47 226.951 65
 1 1 21 2084.45 188.362 56
 1 -1 -21 1883.38 217.249 18
 -1 -1 21 1728.18 206.648 24
 -1 1 -21 2059.97 220.062 61
 1 -1 -21 1885.44 193.118 13
 1 -1 -21 1837.76 233.536 61
 1 1 21 2141.03 220.425 70
 -1 -1 21 2282.01 217.411 56
 1 -1 -21 2006.32 219.413 66
 -1 -1 21 2085.98 183.744 28
 -1 -1 21 2102.33 204.502 23
 -1 1 -21 1982.65 230.009 18
 1 -1 -21 2069.53 215.69 19
 1 1 21 1854.23 216.691 32
 1 -1 -21 1905.39 211.64 65
 1 1 21 1935.49 213.244 73
 1 -1 -22 4694.92 362.893 65
 -1 1 -22 4877.88 390.619 18
 1 -1 -22 5102.13 381.952 18
 1 -1 -22 5095.55 374.628 66
 -1 -1 22 5532.84 362.257 24
 1 1 22 4851.65 367.71 73
 -1 -1 22 5653.82 330.349 28
 1 -1 -22 5081.64 377.357 19
 -1 -1 22 5469.85 367.342 56
 -1 -1 22 5425.52 349.319 23
 1 1 22 5653.51 378.966 70
 -1 1 -22 4666.2 370.681 61
 1 1 22 5167.45 386.488 32
 1 -1 -22 5186.43 352.622 13
 1 1 22 4917.48 333.868 56
 -1 1 -22 4922.06 380.311 65
 -1 -1 23 1160.33 153.369 28
 1 -1 -23 1200.42 184.003 19
 -1 1 -23 1186.93 203.527 13
 1 1 23 1046.37 185.449 73
 -1 1 -23 1698.89 213.251 65
 1 1 23 1234.42 161.081 56
 -1 -1 23 1443.59 204.963 56
 1 -1 -23 997.587 183.228 66
 -1 -1 23 1142.15 173.808 23
 1 1 23 1269.84 191.179 70
 -1 1 -23 1263.47 187.148 61
 -1 -1 23 1220.16 174.486 24
 1 -1 -23 1075.2 162.062 13
 -1 1 -23 1249.21 218.641 18
 1 -1 -23 1201.33 196.569 18
 1 1 23 1224.66 194.124 32
 1 -1 -24 22162.8 1112.71 19
 1 -1 -24 22984.2 1116.43 66
 -1 -1 24 22046.9 1052.7 23
 -1 -1 24 21858.4 1025.4 28
 -1 -1 24 22461.6 1082.7 56
 -1 1 -24 18895.2 1121.33 18
 1 -1 -24 22253.2 1125 18
 -1 1 -24 20893.9 1105.33 61
 -1 1 -24 21311.7 1117.36 13
 1 1 24 21266.3 1091.28 70
 1 1 24 19692.3 1089.35 32
 -1 -1 24 21157.4 1065.18 24
 1 -1 -24 19917 1059.52 13
 1 1 24 19389.9 1080.28 73
 -1 1 -24 19947 1104.43 65
 1 1 24 20399.8 1042.85 56
 -1 -1 25 15935.7 834.532 63
 -1 -1 25 17872.1 891.863 56
 1 1 25 15768.6 843.436 56
 1 1 25 15924.7 886.407 73
 -1 1 -25 14799.6 898.812 65
 -1 -1 25 17184.3 870.835 24
 1 -1 -25 16542.6 906.599 19
 -1 1 -25 14772.8 917.028 18
 -1 -1 25 15946.3 818.262 28
 -1 1 -25 17177.3 928.873 13
 1 -1 -25 16629.8 916.471 18
 -1 1 -25 17772.7 920.825 61
 -1 -1 25 17239.1 853.058 23
 1 -1 -25 15878.6 859.89 13
 1 -1 -25 16725.9 905.87 66
 1 1 25 17024.3 901.609 70
 1 1 26 7860.82 512.992 70
 -1 1 -26 7848.5 518.855 17
 -1 -1 26 8237.47 484.885 24
 1 -1 -26 6452.47 453.83 13
 -1 -1 26 7398.63 442.457 63
 1 -1 -26 6665.21 502.638 18
 -1 1 -26 8185.25 519.51 61
 1 1 26 6950.32 448.607 56
 -1 1 -26 8124.3 536.278 13
 -1 -1 26 7907.54 497.223 56
 -1 -1 26 7405.62 457.881 23
 1 1 26 7288.56 488.638 73
 -1 1 -27 1919.42 243.076 17
 1 1 27 1716.39 243.973 70
 -1 1 -27 1925.48 237.818 61
 1 1 27 1513.72 181.394 56
 -1 -1 27 1411.08 196.977 24
 1 -1 -27 1967.71 239.558 18
 -1 1 -27 1776.76 239.954 13
 1 1 27 2016.09 225.741 73
 1 -1 -27 1539.75 185.17 13
 -1 -1 27 1664.66 237.639 56
 -1 -1 27 1445.32 193.494 23
 1 -1 -28 8744.17 570.647 18
 -1 -1 28 9681.03 556.131 56
 1 1 28 8909.96 566.641 70
 -1 1 -28 9039.74 572.366 17
 1 1 28 7922.21 525.355 73
 -1 -1 28 8294 501.723 23
 -1 -1 28 8913.46 528.252 24
 1 -1 -28 7452.48 497.35 13
 -1 1 -28 8814.44 567.239 61
 -1 1 -28 9264.19 583.157 13
 -1 -1 29 10320.2 587.313 56
 1 1 29 10479.9 661.913 50
 -1 1 -29 9564.97 597.921 17
 -1 -1 29 9071.75 548.613 24
 1 -1 -29 8657.35 585.868 18
 -1 1 -29 9482.35 591.626 61
 1 1 29 9231.15 587.174 70
 -1 -1 29 8150.57 518.838 23
 -1 1 -29 9884.36 604.196 13
 -1 1 -29 8877.96 564.491 71
 -1 -1 30 5073.87 355.308 24
 1 1 30 5685.05 457.576 50
 -1 1 -30 4890.89 365.046 71
 1 1 30 5113.96 397.154 70
 -1 -1 30 5258.79 384.212 56
 -1 1 -30 5032.78 388.931 61
 -1 1 -30 5078.79 397.398 13
 1 -1 -30 4400.7 377.222 18
 -1 1 -30 5230.16 396.929 17
 -1 1 -31 245.279 122.114 61
 -1 1 -31 264.027 110.138 71
 -1 -1 31 249.411 137.56 56
 1 1 31 192.979 137.386 70
 -1 1 -31 56.4865 126.732 13
 1 1 31 281.893 189.169 50
 1 1 31 105.916 141.684 26
 -1 1 -31 117.569 127.417 17
 -1 -1 31 306.756 117.913 24
 1 -1 -31 214.54 138.702 62
 -1 1 -32 4342.75 336.795 61
 -1 -1 32 4542.55 358.012 50
 1 1 32 4912.57 365.296 26
 1 -1 -32 4475.1 343.113 62
 1 1 32 5091.72 410.799 50
 1 1 32 4727.09 350.693 70
 -1 -1 32 4605.6 337.719 56
 -1 1 -32 4027.06 306.551 71
 -1 1 -32 4272.11 331.69 17
 -1 -1 32 4050.54 297.591 24
 -1 1 -32 4241.72 343.448 13
 1 1 33 2649.55 244.817 70
 -1 1 -33 2282.13 200.701 71
 1 1 33 2466.27 242.519 26
 -1 1 -33 2226.08 220.127 17
 -1 -1 33 2747.18 280.222 70
 -1 1 -33 2420.33 228.574 61
 -1 -1 33 2850.68 254.154 50
 1 1 33 2820.94 288.841 50
 -1 -1 33 2481.42 233.386 56
 1 -1 -33 2318.9 231.282 62
 -1 -1 34 2619.06 257.871 70
 1 1 34 2245.13 217.104 26
 1 1 34 2660.71 226.183 70
 1 -1 -34 2241.96 214.077 72
 -1 -1 34 2183.57 207.262 56
 -1 -1 34 2594.27 227.065 50
 -1 1 -34 2193.71 201.238 17
 1 -1 -34 1972.6 205.252 62
 -1 1 -34 2468.03 213.427 61
 1 -1 -34 2277.53 236.047 61
 1 1 34 2764.38 267.909 50
 -1 -1 35 7664.86 437.357 70
 1 1 35 6588.76 388.063 70
 1 -1 -35 6254.7 388.65 62
 1 -1 -35 7078.67 423.618 61
 -1 -1 35 6298.1 385.033 50
 1 -1 -35 6039.69 378.311 72
 -1 1 -35 6559.68 385.412 61
 1 1 35 6944.78 435.327 50
 1 1 35 6353.49 377.197 26
 -1 -1 35 6477 377.978 56
 -1 1 -36 1743.28 150.052 61
 1 1 36 2736.01 219.856 50
 -1 -1 36 2094.94 157.656 56
 -1 -1 36 2812.86 215.654 70
 1 -1 -36 2219.62 172.461 62
 1 -1 -36 2557.06 202.182 61
 1 -1 -36 1701.61 154.552 72
 1 1 36 2163.91 164.59 70
 1 1 37 1022.51 121.897 50
 1 -1 -37 1107.9 118.701 61
 -1 -1 37 1151.39 127.777 70
 1 2 -37 1938.63 154.852 62
 -1 -2 -37 1685.94 151.208 62
 -1 2 37 2455.85 166.6 70
 1 2 -37 2270.47 164.188 61
 -1 2 36 611.971 112.961 70
 1 -2 36 529.193 104.918 70
 -1 -2 -36 493.151 90.2452 61
 1 2 -36 486.529 99.4991 61
 1 -2 36 501.674 91.5422 50
 -1 2 36 621.98 110.854 50
 1 2 -36 588.065 103.713 62
 -1 -2 -36 487.962 103.641 62
 1 -2 35 7764.38 464.071 70
 1 2 -35 8019.49 470.341 61
 -1 2 35 7850.69 462.327 70
 -1 2 35 8324.68 483.647 50
 -1 -2 -35 8329.63 465.512 61
 1 2 -35 7383.46 460.772 62
 1 -2 35 7786.65 462.301 50
 -1 -2 -34 847.515 115.561 17
 -1 -2 -34 768.423 140.425 61
 1 -2 34 893.41 161.283 50
 1 2 -34 984.882 156.166 61
 -1 -2 -34 737.217 130.631 13
 1 -2 34 833.542 160.796 70
 -1 2 34 871.204 164.749 70
 1 2 -34 835.92 151.162 62
 -1 -2 -34 727.666 153.829 18
 1 2 -33 4270.27 333.06 62
 -1 -2 -33 3833.94 284.541 17
 -1 -2 -33 4856.16 349.203 18
 -1 -2 -33 4202.19 302.986 13
 1 -2 33 4320.38 339.221 50
 -1 2 33 4294.04 334.681 70
 -1 -2 -33 4473.85 329.514 61
 1 2 -33 3910.16 326.973 61
 1 -2 33 4579.67 347.695 70
 1 2 -33 3022.78 261.15 72
 -1 -2 -32 1415.76 177.325 17
 -1 2 32 1229.15 154.349 56
 1 2 -32 1240.05 205.805 62
 -1 -2 -32 1061.19 183.596 61
 1 -2 32 1538.22 225.756 70
 1 2 -32 1147.25 158.546 72
 1 2 -32 1363.89 207.97 61
 -1 2 32 1423.1 220.513 70
 1 -2 32 1176.69 173.205 56
 -1 -2 -32 1097.27 177.46 13
 1 -2 32 1636.07 226.002 50
 -1 -2 -32 1843.87 230.218 18
 1 -2 31 2713.3 296.278 50
 1 -2 31 2733.77 300.825 70
 -1 -2 -31 2579.97 262.433 13
 1 2 -31 2432.17 241.437 72
 -1 -2 -31 2900.31 288.983 19
 -1 -2 -31 2762.74 283.713 61
 -1 -2 -31 2638.49 251.685 17
 1 -2 31 2530.12 253.013 56
 -1 2 31 2969.81 295.423 70
 -1 -2 -31 2565.45 288.949 18
 -1 2 31 2727.53 232.78 56
 1 2 -31 2866.68 296.673 62
 1 2 -31 2749.99 285.827 61
 -1 -2 -30 895.737 172.483 13
 1 2 -30 635.516 148.288 72
 1 -2 30 712.707 196.081 50
 -1 2 30 764.533 205.115 70
 -1 -2 -30 972.161 210.059 18
 1 -2 30 829.399 160.346 26
 1 2 -30 756.971 194.968 62
 1 -2 30 729.111 221.608 70
 -1 -2 -30 931.955 175.797 17
 -1 -2 -30 706.254 191.992 61
 -1 -2 -30 692.013 181.738 65
 -1 2 30 782.124 145.257 56
 -1 -2 -30 835.654 192.212 19
 1 2 -30 720.855 185.894 61
 -1 -2 -29 9302.73 613.326 19
 1 -2 29 9413.66 617.739 70
 -1 2 29 9867.04 608.646 70
 -1 2 29 8603.22 532.823 56
 1 -2 29 9598.46 627.908 50
 1 2 -29 10260.8 626.336 62
 1 -2 29 9281.91 573.605 56
 -1 -2 -29 8731.63 620.101 18
 1 -2 29 8713.75 566.545 26
 -1 -2 -29 9718.03 612.286 61
 -1 -2 -29 9940.23 608.664 65
 1 2 -29 9002.16 608.772 61
 -1 -2 -29 9508.65 593.497 13
 -1 -2 -28 6881.06 535.437 18
 1 -2 28 7568.61 497.006 56
 1 -2 28 7061.23 492.97 26
 -1 -2 -28 7880.18 541.858 19
 -1 -2 -28 7437.33 515.266 65
 -1 2 28 7015.68 456.662 56
 1 2 -28 7644.27 533.864 62
 1 -2 28 7302.48 532.07 50
 1 -2 28 8280.74 547.464 70
 -1 2 28 7723.1 523.306 70
 -1 -2 -28 7387.84 508.838 13
 1 2 -28 6934.93 528.719 61
 -1 -2 -28 7840.13 534.083 61
 1 -2 27 2587.77 243.528 24
 1 -2 27 2518.31 303.738 70
 -1 2 27 2656.42 250.898 56
 -1 -2 -27 2753.59 303.12 61
 -1 -2 -27 2842.65 314.459 19
 -1 -2 -27 2846.39 299.058 65
 1 -2 27 2456.19 266.022 56
 1 -2 27 2384.86 303.364 50
 -1 2 27 3337.43 325.487 70
 1 -2 27 2639.15 280.009 26
 1 2 -27 2619.77 302.237 61
 -1 -2 -27 2411.3 307.16 18
 -1 -2 -26 11017 676.809 18
 -1 2 26 9389.79 557.083 24
 1 2 -26 9419.05 650.142 61
 1 -2 26 9708.22 621.441 26
 1 -2 26 9949.98 613.458 56
 1 -2 26 10221.2 651.477 70
 -1 2 26 10563 587.618 56
 1 2 -26 9931.78 592.093 17
 1 -2 26 10354.4 664.615 50
 -1 -2 -26 11282.7 658.186 65
 -1 -2 -26 10132.3 649.667 61
 1 -2 26 10017.3 586.111 24
 -1 -2 -26 10328.1 664.773 19
 -1 2 26 11296.5 656.284 70
 1 -2 25 27150.3 1381.94 26
 1 -2 25 26930.6 1359.62 56
 -1 -2 -25 27431.3 1417.89 19
 -1 2 25 28341.9 1397.43 70
 1 -2 25 26178.3 1334.34 24
 -1 -2 -25 29159.3 1403.96 39
 1 2 -25 24810.1 1337.91 17
 -1 -2 -25 28670.2 1419.3 61
 1 2 -25 27303.8 1417.44 61
 -1 -2 -25 29403.9 1411.36 65
 -1 2 25 28787.2 1342.09 56
 -1 -2 -25 28231.6 1422.99 18
 -1 -2 -25 28471.1 1410.69 55
 -1 2 25 25089.2 1306.76 24
 1 2 -25 26632.7 1406.47 18
 -1 2 25 26295.4 1335.77 22
 1 -2 25 29953.5 1437.13 50
 1 -2 25 28209.6 1403.7 70
 -1 -2 -24 16945.6 950.316 61
 -1 -2 -24 16086.8 955.233 18
 -1 2 24 18527.6 894.97 56
 -1 -2 -24 17375.3 953.034 55
 -1 -2 -24 17980.4 949.238 39
 -1 -2 -24 18143.2 952.86 65
 1 -2 24 16723.6 889.682 24
 -1 2 24 16491 848.613 23
 -1 2 24 16594.5 892.123 22
 1 -2 24 17100.4 931.584 26
 1 -2 24 16902.7 963.606 50
 -1 -2 -24 17740.3 962.309 19
 1 2 -24 16827.5 916.898 13
 1 -2 24 17521 916.182 56
 1 2 -24 17472.3 968.329 61
 1 2 -24 16773.1 903.386 17
 -1 2 24 18262.1 953.296 70
 1 2 -24 17629.7 958.855 18
 -1 2 24 16459.2 867.223 24
 1 -2 24 17706.6 952.447 70
 -1 2 23 12561.9 712.828 34
 -1 2 23 14487.2 792.156 70
 1 2 -23 14713.5 817.988 61
 1 2 -23 13117 750.725 17
 1 2 -23 14056.6 769.356 13
 -1 -2 -23 14422 807.966 19
 -1 2 23 13907.7 703.942 23
 -1 -2 -23 14092.3 788.008 39
 1 -2 23 13758 757.483 56
 -1 2 23 15470.3 746.356 56
 -1 -2 -23 13711.4 789.32 65
 -1 2 23 13104.4 717.27 24
 -1 2 23 14199.6 748.044 22
 1 -2 23 14421.3 797.265 70
 -1 -2 -23 14117.5 795.772 55
 1 2 -23 14939.5 807.759 18
 -1 -2 -23 11507.4 785.34 18
 1 -2 23 13631.2 739.513 24
 -1 -2 -23 14356.7 796.337 61
 1 -2 22 12404.6 698.651 70
 -1 -2 -22 11991.1 695.98 55
 1 2 -22 11437.5 704.791 61
 -1 2 22 11125.1 649.585 22
 1 -2 22 11706.9 651.801 24
 -1 -2 -22 12187 696.208 65
 -1 -2 -22 12284.9 693.537 39
 -1 2 22 12418.9 697.874 70
 -1 -2 -22 11913.4 698.491 61
 1 2 -22 11743.8 673.509 13
 1 -2 22 12194.6 667.809 56
 -1 2 22 11951.8 654.7 73
 -1 2 22 12425.9 645.11 56
 1 2 -22 12000.7 703.343 18
 1 2 -22 11616.7 660.803 17
 -1 2 22 11154.9 623.482 34
 -1 -2 -21 20876.6 1109.07 61
 -1 -2 -21 21902.6 1100.08 39
 1 2 -21 22784.3 1124.72 18
 1 -2 21 21220.9 1062.03 24
 -1 -2 -21 21857.4 1105.55 65
 1 2 -21 20020.1 1115.27 61
 1 2 -21 20871.6 1086.22 13
 -1 2 21 20223.6 1028.73 34
 -1 2 21 23420.7 1064.35 56
 -1 2 21 21955.6 1060.42 22
 1 -2 21 21942.3 1107.21 70
 -1 2 21 21172 1065.12 64
 -1 2 21 21047.5 1098.58 70
 1 2 -21 20358.8 1069.43 17
 1 -2 21 21126.1 1072.39 56
 -1 -2 -21 22069.5 1109.48 55
 1 -2 20 7265.25 452.477 24
 -1 2 20 8656.57 461.172 56
 1 2 -20 7121.41 459.819 17
 -1 -2 -20 7909.83 492.87 39
 -1 2 20 7608.79 458.721 22
 -1 2 20 8107.2 500.643 70
 1 -2 20 7632.38 466.425 56
 -1 2 20 7906.29 472.196 64
 1 2 -20 7857.04 509.548 61
 -1 -2 -20 8048.21 504.029 61
 1 2 -20 7411.95 499.509 18
 -1 2 20 7604.18 437.88 34
 1 -2 20 8142.85 496.257 70
 -1 -2 -20 8494.97 503.679 55
 1 2 -20 7345.29 473.725 13
 1 -2 19 15686.8 836.027 73
 1 -2 19 16751.7 870.457 70
 -1 -2 -19 15817.3 866.744 55
 1 -2 19 16395.1 843.002 56
 1 2 -19 16249.2 830.428 71
 -1 2 19 16694.7 808.591 34
 -1 2 19 17222.4 841.608 64
 -1 2 19 16822 870.618 70
 -1 -2 -19 15873.5 870.208 61
 1 -2 19 17170.2 839.414 24
 -1 -2 -19 15903.4 861.104 39
 -1 2 19 16885.4 833.854 22
 1 2 -19 16079.2 855.627 13
 1 2 -19 16097.7 877.864 18
 1 2 -19 16217.7 846.53 17
 1 2 -19 17725 897.382 61
 1 -2 18 1158.79 153.406 56
 -1 2 18 852.227 126.632 12
 1 2 -18 1021.71 144.25 13
 -1 -2 -18 925.986 143.745 55
 -1 2 18 788.8 155.28 64
 1 2 -18 970.006 136.513 17
 -1 -2 -18 1049.43 146.174 39
 1 -2 18 1034.56 135.577 24
 -1 2 18 926.472 156.414 53
 -1 2 18 852.248 134.26 34
 1 -2 18 851.977 132.73 73
 1 -2 18 864.529 158.216 70
 1 2 -18 958.784 124.057 1
 -1 -2 -18 1094.62 149.94 2
 -1 -2 -18 805.964 125.702 38
 -1 -2 -18 971.064 150.242 61
 -1 2 18 716.005 129.575 27
 1 2 -18 1006.07 123.536 71
 1 2 -18 932.161 131.843 8
 -1 2 18 1018.88 152.46 22
 1 2 -18 838.483 144.898 18
 1 -2 18 886.535 120.449 3
 -1 2 18 1100.69 174.839 70
 1 2 -18 933.102 158.411 61
 -1 2 17 2244.98 205.308 53
 1 2 -17 2191.92 188.176 1
 1 2 -17 2146.94 201.24 13
 -1 -2 -17 2265.76 207.167 2
 1 2 -17 2152.84 190.788 17
 1 2 -17 2106.16 211.946 18
 -1 2 17 1948.03 188.834 12
 1 2 -17 1981.98 215.575 11
 1 -2 17 2342.14 200.09 56
 -1 -2 -17 2135.3 209.216 1
 1 2 -17 2082.2 214.567 61
 -1 -2 -17 2017.14 203.753 55
 -1 2 17 2375.07 185.394 34
 -1 2 17 2406.9 202.696 22
 1 -2 17 2033.66 187 24
 -1 -2 -17 2139.22 196.793 10
 -1 -2 -17 2007.75 180.91 38
 1 -2 17 2243.57 218.009 70
 1 -2 17 1867.89 184.872 73
 1 2 -17 2067.11 192.541 10
 1 -2 17 2005.1 181.731 3
 1 2 -17 2102.84 177.162 71
 -1 -2 -17 2142.31 206.874 61
 1 -2 17 2183.85 171.415 6
 -1 2 17 2226.8 205.33 64
 -1 2 17 2311.91 222.704 70
 1 -2 17 2514.28 235.583 1
 1 2 -17 2066.64 193.795 8
 -1 -2 -17 2350.85 206.724 39
 -1 2 17 2118.72 188.77 27
 -1 2 16 5212.18 294.85 34
 -1 -2 -16 5116.77 333.682 61
 1 2 -16 4920.05 301.842 71
 1 -2 16 4782.27 305.752 3
 -1 -2 -16 4877.37 316.785 10
 1 2 -16 4657.81 302.102 1
 1 2 -16 4793.96 337.978 61
 -1 2 16 4999.22 308.629 27
 1 -2 16 4715.73 288.526 6
 -1 2 16 5338.9 317.816 53
 1 -2 16 5174.05 308.451 24
 1 2 -16 5042.86 323.209 13
 1 -2 16 5097.92 336.097 70
 1 2 -16 4807.12 334.754 18
 1 2 -16 4961.52 345.202 2
 -1 -2 -16 4977.33 324.379 39
 -1 2 16 5285.78 312.382 22
 -1 -2 -16 4896.34 336.69 1
 1 -2 16 4932.02 349.708 1
 -1 -2 -16 4662.48 302.963 38
 -1 2 16 4493.62 313.7 12
 1 -2 16 4446.74 306.134 73
 -1 2 16 5037.49 314.304 64
 -1 -2 -16 5146.51 326.263 3
 -1 2 16 4898.7 334.598 70
 -1 -2 -16 5062.46 329.331 55
 1 -2 16 4555.98 308.342 56
 1 2 -16 4402.4 312.169 8
 1 2 -16 4631.49 312.433 10
 1 2 -16 4915.76 351.572 11
 -1 2 16 4729.85 339.018 3
 1 2 -16 5108.71 317.121 17
 -1 -2 -16 4668.56 343.242 8
 -1 2 16 4325.55 307.906 9
 1 2 -16 4859.84 328.196 19
 -1 -2 -16 5092.71 330.68 2
 -1 2 15 40717.9 1719.8 10
 1 2 -15 36458.3 1710.4 19
 -1 -2 -15 36365.5 1692.21 9
 1 -2 15 37223.6 1686.93 56
 -1 -2 -15 36873.8 1687.99 67
 -1 2 15 33764 1687.65 9
 1 2 -15 36316.3 1737.02 11
 1 2 -15 34480 1688.86 10
 -1 -2 -15 36243.2 1702.41 3
 -1 2 15 34604.3 1695.74 12
 1 2 -15 37015.3 1716.54 18
 1 2 -15 36338.5 1698.81 13
 1 -2 15 35295.9 1701.71 70
 -1 2 15 39288.9 1687.12 64
 -1 2 15 39756.8 1686.87 53
 1 2 -15 34946.2 1693.08 8
 -1 -2 -15 36812.1 1721.65 1
 1 -2 15 37090.2 1681.58 24
 1 2 -15 36446.5 1684.36 1
 1 2 -15 31881.7 1707.28 61
 -1 2 15 34855.5 1721.36 3
 1 -2 15 36038.3 1730.68 1
 1 2 -15 37550.9 1730.37 2
 -1 -2 -15 35816.3 1680.41 38
 1 2 -15 38156.4 1721.97 66
 -1 -2 -15 36604.1 1706.79 2
 -1 -2 -15 36858.7 1695.27 10
 -1 -2 -15 37842 1713.63 61
 -1 2 15 40086 1683.59 27
 -1 2 15 37799.7 1656.87 34
 1 -2 15 35149.8 1665.56 23
 1 -2 15 35466.8 1681.94 3
 1 2 -15 34216.7 1686.95 17
 -1 -2 -14 62794.1 2846.22 10
 -1 -2 -14 66324.1 2847.3 9
 1 -2 14 63070.1 2883.66 1
 1 2 -14 63130.5 2863.01 19
 -1 2 14 68253.1 2839.56 53
 -1 -2 -14 65264.8 2864.27 61
 1 2 -14 60817.9 2843.65 10
 -1 2 14 55809.7 2865.02 3
 1 2 -14 59903.6 2833.35 1
 -1 2 14 65015.2 2835.42 64
 1 -2 14 61399 2835.24 3
 1 -2 14 62246 2855.8 70
 1 2 -14 63134.4 2886.4 11
 1 2 -14 62840.8 2851.96 13
 1 2 -14 61646.2 2873.02 66
 -1 2 14 67427.1 2866.62 12
 -1 -2 -14 65797.2 2857.95 3
 -1 2 14 69959 2870.1 10
 1 -2 14 60249.1 2835.69 56
 -1 -2 -14 63460.1 2874.99 1
 1 2 -14 60332.3 2844.94 8
 -1 -2 -14 62838.9 2857.6 2
 1 2 -14 62698.6 2867.26 18
 -1 2 13 3742.98 256.917 12
 -1 2 13 3631.73 255.871 10
 -1 -2 -13 3570.73 242.304 2
 -1 2 13 3415.36 232.065 64
 1 -2 13 3079.36 219.448 3
 -1 -2 -13 3540.07 258.506 1
 -1 2 13 3662.48 238.219 53
 1 2 -13 3326.69 230.431 8
 -1 -2 -13 3614.8 239.885 10
 1 2 -13 3582.9 229.253 1
 1 -2 13 3102.51 254.135 1
 1 -2 13 3542.49 244.241 70
 -1 -2 -13 3601.67 231.648 9
 1 2 -13 3324 243.765 18
 1 2 -13 3427.34 235.876 10
 1 2 -13 3052.4 236.127 19
 1 2 -13 3455.65 261.668 11
 -1 -2 -13 3620.9 241.844 3
 1 -2 12 24429.6 1312.2 1
 -1 2 12 23572.5 1295.51 10
 -1 -2 -12 29190.5 1305.71 2
 -1 2 12 28594.2 1318.01 12
 -1 -2 -12 28646.6 1291.76 9
 -1 -2 -12 29078.4 1302.84 3
 1 2 -12 28638 1295.65 10
 -1 -2 -12 28768.8 1295.24 10
 -1 -2 -12 28780.8 1321.99 1
 1 2 -12 28219.4 1287.47 1
 1 2 -12 25752.6 1318.88 12
 1 -2 12 28089.8 1285.53 3
 1 2 -12 31063.1 1338.58 11
 1 2 -12 27942.6 1293.14 8
 -1 -2 -11 4859.48 311.47 1
 1 -2 11 5245.42 284.476 3
 -1 -2 -11 4917.68 295.525 2
 1 2 -11 5026.42 291.384 10
 -1 -2 -11 5241.41 291.011 9
 1 2 -11 5159.99 285.567 1
 1 2 -11 4120 306.833 12
 1 2 -11 5347.88 289.882 8
 -1 2 11 4440.42 297.336 10
 -1 -2 -11 5266.06 295.022 10
 -1 2 11 4658.95 307.453 12
 1 2 -11 5057.47 317.97 11
 -1 -2 -11 5445.56 301.922 3
 1 2 -10 33829.1 1499.8 8
 -1 -2 -10 34585 1510.84 2
 -1 2 10 30840.1 1503.23 9
 1 -2 10 33253 1478.33 9
 -1 -2 -10 34520.6 1503.66 10
 -1 2 10 29654.4 1521.09 12
 1 2 -10 33830 1499.15 1
 1 2 -10 32575 1529.99 12
 1 -2 10 33243.5 1495.65 3
 1 2 -10 34255.3 1504.62 10
 -1 -2 -10 33651.7 1529.71 1
 -1 -2 -10 34150 1502.48 9
 -1 2 10 29435.2 1507.36 10
 -1 -2 -10 33294.3 1507.81 3
 -1 -2 -9 79800.7 3371.81 3
 -1 2 9 71197.6 3371.81 10
 1 -2 9 73613.9 3339.76 9
 -1 2 9 76071.6 3369.15 9
 1 2 -9 74803.8 3363.91 10
 1 -2 9 77577.9 3357.88 3
 1 2 -9 77647.6 3361.25 1
 -1 -2 -9 76606.4 3392.53 1
 1 2 -9 77838.1 3393.81 12
 -1 -2 -9 75323 3363.26 10
 -1 -2 -9 78121.6 3370.01 2
 1 2 -9 76529.6 3359.96 8
 -1 -2 -9 78470.9 3364.59 9
 -1 2 9 71087.6 3384.98 3
 1 -2 8 61704.3 3080.96 1
 1 -2 8 67236.1 3055.62 3
 -1 -2 -8 70877.4 3066.42 9
 1 2 -8 70468.9 3093.29 12
 -1 -2 -8 66989.7 3062.18 10
 -1 -2 -8 71713.6 3069.3 2
 1 2 -8 69075.7 3061.49 1
 -1 -2 -8 69208.3 3069.82 3
 1 2 -8 71953.2 3059.02 8
 -1 -2 -8 68791.8 3089.72 1
 -1 2 8 69287.1 3091.78 3
 1 -2 8 68300.7 3041.08 9
 -1 2 8 73199.9 3075.39 9
 1 2 -8 71066.9 3066.1 10
 -1 -2 -7 14754.5 670.62 2
 1 2 -7 15139.3 668.89 10
 1 -2 7 13295.6 687.354 1
 -1 2 7 14348 690.799 3
 -1 -2 -7 13929 670.779 3
 1 2 -7 15052.8 697.241 12
 -1 2 7 15590.4 676.777 9
 1 2 -7 13528.8 662.929 1
 -1 -2 -7 13839.9 668.67 9
 -1 -2 -7 13592.6 664.455 10
 1 -2 7 14052.6 657.882 3
 1 2 -6 45633.7 2004.35 10
 -1 -2 -6 43392.1 2001.01 10
 -1 2 6 47704.4 2013.84 9
 1 -2 6 46982 2027.81 1
 -1 2 6 46533.3 2029.24 3
 -1 2 6 39953.7 2020.8 2
 -1 -2 -6 43754.1 2011.08 3
 -1 -2 -6 47466.3 2005.66 2
 -1 -2 -5 87405.2 3727.32 6
 1 2 -5 89603.9 3715.16 10
 -1 2 5 80999.6 3736.1 2
 -1 -2 -5 84778.9 3713.23 2
 -1 2 5 89161.1 3737.98 3
 -1 -2 -5 77999.5 3710.54 10
 1 2 -5 82067.7 3705.46 5
 1 2 -5 78705.5 3734.36 11
 1 -2 5 88647.6 3737.76 1
 1 -2 5 84012.9 3691.79 6
 -1 2 5 90122.5 3724.61 9
 -1 -2 -5 87991 3726.26 3
 -1 2 4 158199 6775.25 9
 1 -2 4 158031 6761.93 11
 1 2 -4 157042 6758.93 5
 1 2 -4 154404 6764.63 10
 1 -2 4 153469 6785.95 1
 -1 2 4 154640 6790.52 2
 1 -2 4 145643 6791.12 8
 1 2 -4 146965 6788.5 11
 -1 2 4 159904 6789.11 3
 -1 -2 -4 160474 6784.11 6
 -1 -2 -4 150829 6763.25 10
 1 2 -3 5257.43 253.146 10
 1 2 -3 5356.93 279.513 11
 -1 2 3 4998.13 259.663 9
 -1 2 3 5441.31 272.972 3
 1 -2 3 5202.34 250.981 11
 -1 -2 -3 5252.48 251.006 7
 1 -2 3 5487.21 274.777 1
 1 -2 3 5332.61 285.8 8
 1 2 -3 5189.58 246.757 5
 -1 -2 -3 5375.47 277.14 6
 -1 -2 -3 5725.24 252.206 10
 1 2 -3 6087.37 293.753 12
 -1 -2 -2 100252 4653.47 6
 -1 -2 -2 110447 4629.93 7
 1 2 -2 108287 4656.59 12
 -1 2 2 101749 4637.92 9
 -1 2 2 102407 4648.89 5
 1 -2 2 107283 4648.96 1
 1 2 -2 106999 4628.74 5
 -1 2 1 18657.1 534.828 9
 -1 -2 -1 18175.5 544.563 12
 1 2 -1 21787.9 572.526 12
 1 -2 1 17637.8 551.949 1
 -1 -2 0 312752 13337.8 12
 -1 2 0 309008 13321.6 9
 -1 2 0 305984 13346.3 5
 -1 2 0 302073 13349.6 7
 1 2 0 296065 13339.1 12
 1 -2 0 293656 13345.3 5
 -1 2 0 306332 13332.8 1
 1 -2 0 310430 13332.9 1
 1 -2 0 303032 13331.9 3
 -1 -2 0 309615 13329 5
 1 -2 -1 15406.5 616.943 3
 -1 -2 1 9684.42 594.462 5
 -1 2 -1 11748 619.816 5
 -1 2 -1 10617.2 617.099 7
 1 -2 -1 13818.2 603.198 1
 1 2 1 11961.4 626.079 6
 1 -2 -1 13199.1 621.579 5
 -1 2 -1 10993.9 587.684 6
 -1 -2 1 11580.5 618.18 11
 1 -2 -1 10952.9 618.37 7
 -1 2 -1 16261.1 618.294 1
 1 -2 -2 106783 4784.41 3
 -1 -2 2 107506 4793.91 11
 -1 -2 2 116361 4766.86 10
 1 -2 -2 112481 4797.43 7
 -1 2 -2 106378 4793.68 5
 1 2 2 106061 4764.79 2
 1 -2 -2 108452 4787.92 5
 -1 2 -2 108228 4783.08 1
 1 -2 -2 106577 4767.96 1
 1 2 2 111507 4774.93 12
 -1 -2 2 110908 4767.36 5
 -1 -2 2 105357 4787.19 12
 1 2 2 109115 4793.89 6
 -1 -2 3 5058.63 288.047 11
 -1 -2 3 5105.01 252.462 8
 -1 -2 3 6679.55 264.624 10
 -1 -2 3 5136.39 269.022 1
 -1 2 -3 6459.8 286.769 1
 1 -2 -3 4974.64 289.645 7
 1 -2 -3 5251.37 276.419 3
 1 2 3 5166.2 255.844 12
 1 2 3 4968.74 282.28 6
 1 -2 -3 5247.68 277.238 5
 -1 2 -3 5189.81 285.209 5
 -1 -2 4 134712 6956.55 11
 1 -2 -4 161887 6959.57 3
 1 -2 -4 156615 6931.66 1
 -1 -2 4 151639 6946.95 1
 -1 -2 4 152173 6932.97 8
 1 2 4 159289 6929.83 12
 -1 2 -4 157062 6956.67 1
 1 -2 -4 163054 6954.54 5
 1 -2 -4 155273 6963.71 7
 1 2 4 165465 6960.87 6
 -1 -2 5 87080.1 3792.48 1
 1 -2 -5 88801.2 3807.29 3
 1 2 5 88926.7 3802.33 6
 1 2 5 85375.8 3766.94 12
 -1 2 -5 81253.1 3801.15 1
 1 -2 -5 85324.2 3774.19 1
 1 -2 -5 90251.9 3797.5 5
 1 -2 -6 46132.9 2032.75 1
 1 -2 -6 47717.2 2054.56 5
 -1 -2 6 47660.7 2064.35 12
 1 2 6 45614.8 2018.6 12
 -1 -2 6 47154.6 2051.77 1
 -1 2 -6 42534.4 2060.49 1
 -1 2 -6 45053.6 2035.58 11
 1 -2 -6 48184 2070.01 3
 -1 2 -6 45894.3 2036.49 12
 1 2 6 48004.5 2060.96 6
 -1 2 -7 13308.9 637.461 12
 1 2 7 14912.4 666.073 6
 1 -2 -7 14469.7 640.084 1
 1 -2 -7 14662.6 679.637 3
 -1 -2 7 14464.1 657.791 1
 -1 -2 7 14486.7 672.139 12
 -1 2 -7 13863.3 643.706 11
 -1 -2 8 74482.8 2984.26 12
 1 2 8 70070.6 2975.66 6
 1 -2 -8 71729.5 2991.61 3
 1 2 8 60703.6 2924.6 12
 1 -2 -8 66917.1 2984.83 2
 1 -2 -8 71143.8 2950.33 1
 -1 2 -8 66437.2 2945.68 12
 -1 -2 8 71015.1 2968.89 1
 -1 2 -8 70038.5 2956.45 11
 1 2 9 67377.3 3179.81 12
 1 -2 -9 77303.7 3256.46 3
 1 2 9 79040.4 3241.41 6
 1 -2 -9 78536.4 3213.7 1
 -1 2 -9 75347.7 3207.5 12
 -1 2 -9 77849.2 3222.41 11
 1 -2 -9 66111.1 3244.26 2
 -1 -2 9 76783.1 3239.93 12
 -1 -2 9 76170.7 3232.14 1
 -1 2 -10 34867.7 1440.95 11
 -1 2 -10 36168.9 1485.39 8
 1 -2 -10 32057.3 1426.51 1
 -1 -2 10 33649.8 1448.6 1
 1 2 10 28840.8 1386.82 12
 -1 -2 10 31738.6 1471.74 3
 1 -2 -10 30830.2 1466.11 3
 1 2 10 33801 1455.18 6
 -1 2 -10 34498.4 1424.39 12
 -1 -2 10 34322.9 1458.26 12
 -1 2 -11 5155.93 272.868 11
 1 2 11 4098.64 212.63 12
 -1 -2 11 4941.01 284.247 12
 1 2 11 4975.4 285.159 6
 -1 2 -11 5111.08 312.472 8
 -1 -2 11 4663.8 299.401 3
 1 -2 -11 5121.18 260.862 1
 -1 -2 11 4865.01 278.179 1
 -1 2 -11 5574.19 259.206 12
 -1 2 -12 29186.5 1159.88 11
 1 -2 -12 28118.3 1136.2 1
 1 2 12 28372.6 1168.46 6
 -1 -2 12 27234.8 1159.37 1
 -1 -2 12 27874.6 1190.34 3
 -1 2 -12 30786.7 1135.27 12
 -1 -2 12 29704.2 1166.22 12
 -1 2 -12 29782.8 1207.86 8
 -1 2 -12 28078.7 1186.92 1
 -1 -2 13 3128.23 238.461 3
 -1 -2 13 3418.29 196.691 34
 1 2 13 3207.77 219.565 6
 -1 2 -13 3226 230.306 18
 1 -2 -13 3716.63 234.597 61
 -1 -2 13 3277.05 217.369 12
 -1 2 -13 3303.29 252.278 8
 -1 -2 13 3460.42 220.923 70
 -1 2 -13 3326.37 212.992 11
 1 2 13 3313.67 230.415 32
 -1 -2 13 3477.1 204.082 22
 -1 2 -13 3150.22 189.755 12
 1 -2 -13 3637.3 233.665 66
 1 2 13 2264.86 134.453 12
 1 -2 -13 3237.84 220.029 55
 1 -2 -13 3680.12 204.983 1
 1 -2 -13 3283.47 218.416 39
 -1 2 -13 3095.61 236.673 1
 -1 -2 13 3118.75 215.813 1
 -1 2 -13 3099.57 224.219 19
 -1 -2 13 2933.76 215.121 9
 -1 -2 14 62398.7 2819.87 70
 -1 -2 14 61307.6 2821.13 1
 -1 -2 14 64671.9 2784.66 34
 1 -2 -14 62849.5 2797.07 1
 -1 2 -14 57387.5 2782.33 12
 -1 -2 14 62833.2 2796.42 22
 1 2 14 65079.1 2833.76 6
 -1 2 -14 63465.4 2842.17 19
 1 2 14 64801.7 2838.04 73
 -1 2 -14 58441.4 2859.62 8
 -1 2 -14 57843.4 2815.06 11
 1 2 14 66582 2837.95 32
 1 -2 -14 62139.7 2825.71 39
 -1 2 -14 65341.3 2849.54 18
 1 -2 -14 60269.2 2830.66 66
 -1 -2 14 60558 2792.1 64
 1 -2 -14 64957.9 2841.64 61
 -1 -2 14 63856.6 2857.49 3
 -1 -2 14 62714.9 2816.26 12
 1 -2 -14 62037.6 2831.94 55
 -1 2 -14 64855 2850.82 1
 -1 2 -14 64133.5 2831.64 65
 -1 -2 14 65356.4 2829.66 9
 1 2 15 33864.5 1657.6 41
 -1 2 -15 36429 1674.29 61
 -1 -2 15 35713 1638.44 22
 -1 -2 15 35525.8 1665.4 1
 -1 -2 15 34811 1695.86 3
 1 2 15 36290.5 1649.18 70
 -1 -2 15 36395.3 1625.12 34
 1 2 15 37037 1677.81 32
 -1 2 -15 37373.7 1677.75 65
 1 -2 -15 35806.7 1658.28 65
 -1 2 -15 31825.4 1697.58 8
 -1 -2 15 37327.6 1667.54 70
 -1 -2 15 38499 1655.58 56
 -1 -2 15 37903.2 1672.41 9
 1 -2 -15 34714.6 1658.68 60
 -1 2 -15 30396.5 1651.06 11
 -1 -2 15 34847.3 1653.33 12
 -1 2 -15 37696 1696.42 1
 1 -2 -15 36076.1 1670.37 39
 1 2 15 35687.1 1672.77 6
 -1 2 -15 35685.5 1685.13 19
 -1 2 -15 36125.3 1659.86 39
 1 -2 -15 35995.7 1681.7 66
 1 -2 -15 35446.4 1676.02 55
 1 2 15 36296.6 1676.89 73
 1 -2 -15 37915.1 1687.77 61
 1 -2 -15 34903.8 1636.42 1
 1 -2 -15 35149.8 1661.85 19
 -1 2 -15 37436 1696.18 18
 1 2 16 4539.96 319.372 32
 -1 2 -16 4175.69 303.923 11
 1 -2 -16 4709.02 311.115 19
 1 2 16 4772.93 319.224 6
 1 -2 -16 4603.08 287.043 1
 -1 2 -16 5374.47 342.731 18
 -1 -2 16 4356.96 296.255 12
 -1 2 -16 4686.11 306.435 39
 -1 2 -16 4736.73 352.34 8
 1 -2 -16 5335.91 331.617 55
 1 -2 -16 4682.47 326.625 61
 -1 -2 16 5383.39 316.785 56
 -1 -2 16 4543.12 313.478 1
 -1 2 -16 5309.62 328.069 61
 -1 -2 16 4855.22 297.938 22
 1 -2 -16 4746.59 317.646 39
 1 2 16 4671.5 300.269 70
 -1 -2 16 4813.5 312.402 9
 1 -2 -16 4117.43 316.238 10
 1 -2 -16 4857.86 324.877 66
 -1 2 -16 4801.38 318.817 65
 1 2 16 4668.76 309.199 41
 1 -2 -16 4681.63 304.862 65
 -1 -2 16 4845.81 341.447 3
 -1 2 -16 4893.81 335.298 1
 -1 -2 16 4665.49 314.668 70
 -1 -2 16 4823.12 287.24 34
 -1 2 -16 5217.31 334.968 19
 1 -2 -16 4849.48 308.419 60
 1 2 16 5268.4 330.617 73
 -1 -2 17 1885.08 176.285 12
 -1 2 -17 2531.65 241.576 8
 1 2 17 1967.59 196.884 6
 1 2 17 2227.3 213.667 73
 1 -2 -17 2108.07 203.32 66
 -1 2 -17 2389.46 224.684 18
 -1 -2 17 2099.13 193.253 22
 1 2 17 2088.52 183.204 70
 1 -2 -17 1973.07 185.41 65
 -1 2 -17 2373.08 215.145 19
 1 -2 -17 2230.68 196.839 19
 -1 2 -17 2395.8 207.246 61
 1 2 17 2068.73 191.372 41
 -1 2 -17 1922.77 190.094 11
 1 -2 -17 1863.67 179.529 60
 1 -2 -17 2104.86 201.43 55
 -1 -2 17 2279.59 226.071 3
 -1 -2 17 2281.98 210.394 70
 -1 -2 17 2368.29 199.626 56
 1 -2 -17 2201.16 202.128 39
 -1 -2 17 1916.7 186.173 9
 1 -2 -17 2073.65 198.08 18
 -1 2 -17 2370.65 206.841 65
 1 2 17 2086.56 209.685 32
 -1 -2 17 2152.74 186.952 34
 -1 -2 17 1953.92 189.352 1
 1 -2 -17 2336.01 214.964 61
 -1 2 -17 2155.54 208.691 1
 1 -2 -17 2172.52 172.325 1
 -1 -2 18 956.843 144.55 56
 -1 2 -18 919.035 128.892 11
 -1 -2 18 681.072 109.673 12
 1 -2 -18 872.709 135.492 18
 -1 -2 18 754.052 124.854 1
 -1 -2 18 854.106 151.882 70
 1 -2 -18 1026.5 154.97 61
 1 2 18 1181.94 139.177 70
 1 -2 -18 749.561 115.446 33
 1 2 18 932.178 150.784 73
 1 2 18 874.331 157.571 32
 1 -2 -18 963.741 135.814 19
 1 2 18 789.757 128.165 41
 -1 -2 18 847.498 144.961 22
 1 -2 -18 997.914 136.958 65
 -1 2 -18 917.789 140.163 61
 -1 2 -18 936.883 150.773 19
 1 -2 -18 947.674 143.192 55
 1 -2 -18 665.551 137.61 66
 -1 2 -18 891.56 141.746 65
 -1 -2 18 844.863 139.508 34
 -1 2 -18 861.778 153.416 18
 -1 2 -19 17703.9 892.676 18
 -1 -2 19 17372.5 838.925 56
 -1 2 -19 17672.4 884.991 19
 -1 2 -19 16636.7 863.146 65
 1 2 19 15108 824.828 41
 1 -2 -19 17498 876.97 55
 1 -2 -19 15732 854.615 18
 1 2 19 16389.9 857.719 73
 1 2 19 15957.2 829.723 70
 1 2 19 15429 854.569 32
 -1 -2 19 17533.1 840.434 24
 1 -2 -19 16335.9 859.428 66
 -1 2 -19 16875.6 863.767 61
 -1 -2 19 17783.1 828.342 23
 -1 -2 19 15373.1 819.26 22
 1 -2 -19 15917.5 874.18 61
 1 -2 -19 16080.8 842.507 65
 -1 -2 19 14547.5 799.751 34
 -1 -2 19 16402.9 855.042 70
 1 -2 -19 16770 855.804 19
 -1 2 -20 7048.83 491.164 13
 -1 2 -20 8100.41 511.55 18
 -1 2 -20 7932.87 486.91 65
 -1 -2 20 8188.35 469.54 56
 -1 2 -20 8116.68 496.427 61
 -1 -2 20 7784.77 482.624 70
 1 -2 -20 7765.68 468.609 65
 1 -2 -20 8077.68 505.639 61
 -1 -2 20 7793.18 450.432 23
 -1 2 -20 7612.75 495.842 19
 1 2 20 7631.52 463.431 70
 1 -2 -20 7730.92 476.937 19
 -1 -2 20 7318.46 455.808 22
 -1 -2 20 7953.61 466.265 24
 1 2 20 6810.48 446.329 41
 1 -2 -20 7482.95 481.336 66
 1 2 20 7866.7 490.652 32
 1 2 20 7432.05 480.801 73
 -1 -2 20 8324.2 442.552 28
 1 -2 -20 8088.07 492.887 18
 1 -2 -20 7235.68 447.022 13
 1 2 21 20929.1 1083.37 32
 -1 -2 21 21276.2 1078.61 70
 -1 -2 21 21735.5 1054.77 24
 1 2 21 20241.5 1074.92 73
 1 -2 -21 21740.9 1089.87 18
 -1 2 -21 20775.6 1081.31 61
 -1 -2 21 21277.8 1054.71 56
 -1 2 -21 20742.7 1093.5 13
 1 -2 -21 20390.9 1076.41 66
 -1 -2 21 21641.6 1040.29 23
 1 -2 -21 21678.3 1108.31 61
 1 -2 -21 19085.4 1032.98 13
 -1 2 -21 21082.1 1085.58 65
 1 2 21 21083.1 1055.57 70
 1 -2 -21 19779.9 1056.96 65
 -1 2 -21 20241.8 1090.07 19
 1 -2 -21 20444 1071.28 19
 -1 2 -21 21233.2 1108.91 18
 -1 -2 21 23438.9 1030.47 28
 -1 2 -22 12681.7 713.963 18
 -1 2 -22 11559.6 693.2 13
 1 -2 -22 11461.8 676.707 66
 1 2 22 12332 661.071 70
 1 -2 -22 10512.3 650.841 65
 1 2 22 11400.9 677.479 32
 -1 -2 22 12661.1 624.711 28
 -1 -2 22 12639 660.436 24
 -1 2 -22 10986.7 670.818 61
 1 -2 -22 10477.5 626.471 13
 1 -2 -22 12274.7 703.396 61
 -1 -2 22 12204.3 641.463 23
 1 -2 -22 11148.3 675.335 18
 1 -2 -22 11373.9 666.072 19
 -1 -2 22 11598.1 680.501 70
 1 2 22 10814.3 666.582 73
 -1 2 -22 11719.4 695.601 19
 -1 2 -22 11900.1 681.794 65
 -1 -2 22 12381 660.475 56
 1 -2 -23 14489.4 804.829 18
 -1 -2 23 15020.7 779.264 24
 -1 -2 23 13838.4 797.263 70
 -1 -2 23 14358.4 730.89 28
 1 -2 -23 13743.4 748.888 13
 -1 -2 23 14198.6 751.141 23
 -1 2 -23 14209 800.127 65
 1 2 23 13558.8 792.764 73
 -1 2 -23 13511.8 803.325 13
 -1 2 -23 14548.1 825.591 18
 -1 2 -23 14764.3 802.396 61
 1 -2 -23 14858.9 800.831 66
 1 -2 -23 13353.5 777.548 19
 -1 2 -23 14602.2 810.124 17
 1 -2 -23 13457.3 772.78 65
 1 2 23 13266 763.252 70
 1 -2 -23 15187.9 829.696 61
 -1 2 -23 13612.9 810.319 19
 1 2 23 15224.9 809.035 32
 -1 -2 23 14009.2 769.83 56
 -1 2 -24 17293.5 925.406 61
 -1 2 -24 16109.4 926.484 13
 1 2 24 15730.3 913.821 32
 -1 2 -24 17976.8 962.363 18
 1 2 24 17438 908.504 70
 -1 2 -24 16506.1 939.843 19
 -1 -2 24 17625.1 855.818 28
 -1 -2 24 18150.3 910.689 56
 -1 -2 24 17285.8 934.817 70
 -1 2 -24 15639.8 924.289 17
 1 -2 -24 17773.6 958.828 61
 1 2 24 15801 909.647 73
 -1 2 -24 16825.9 929.083 65
 -1 -2 24 17144.3 892.968 24
 1 -2 -24 17513.9 924.654 66
 1 -2 -24 15665.5 866.86 13
 -1 -2 24 17105.1 867.75 63
 1 -2 -24 15990.3 910.363 19
 -1 -2 24 17502.7 881.116 23
 1 -2 -24 16461.4 921.692 18
 1 -2 -25 27436.3 1367.3 19
 -1 -2 25 25195.3 1304.45 63
 -1 2 -25 26313.4 1374.65 65
 -1 2 -25 27302.6 1377.82 17
 -1 2 -25 27427.5 1398.11 18
 1 2 25 27872.5 1372.85 73
 -1 2 -25 24607.7 1371.37 19
 1 -2 -25 27338.9 1370.39 66
 -1 2 -25 27134.4 1373.2 61
 -1 -2 25 26024.7 1373.21 70
 1 2 25 26783.5 1367.89 32
 -1 -2 25 27212.1 1318.27 23
 1 -2 -25 27611.1 1405.65 61
 1 2 25 27605.8 1354.78 70
 -1 2 -25 27954.6 1393.16 13
 1 -2 -25 24662.7 1307.95 13
 1 -2 -25 28178.3 1384.2 18
 -1 -2 25 28364.5 1344.79 24
 -1 -2 25 26675 1289.93 28
 -1 -2 25 29260.9 1358.38 56
 -1 -2 26 10655 619.928 56
 -1 -2 26 10474.6 603.393 24
 -1 -2 26 9578.44 549.068 28
 1 2 26 10385.2 622.47 73
 1 -2 -26 9220.38 601.838 19
 -1 2 -26 10137 639.597 13
 -1 2 -26 9453.55 615.286 61
 1 -2 -26 10544.2 634.714 18
 1 -2 -26 10144.3 620.111 66
 -1 2 -26 9612.25 648.289 18
 1 2 26 10002.1 611.261 70
 1 -2 -26 9661.79 652.601 61
 1 2 26 10324.2 630.702 32
 -1 -2 26 9892.65 564.506 63
 -1 2 -26 10005.2 632.16 17
 -1 -2 26 10345 586.28 23
 1 -2 -27 2479.29 313.859 61
 -1 -2 27 2512.3 220.291 63
 1 -2 -27 2640.09 279.464 18
 -1 2 -27 2827.55 274.404 71
 -1 -2 27 2794.35 284.541 56
 1 2 27 2432.98 265.755 70
 -1 2 -27 2549.79 292.793 13
 -1 2 -27 2316.3 264.885 61
 -1 -2 27 2234.04 240.268 23
 1 2 27 2321.26 258.252 73
 1 -2 -27 2535.24 272.93 66
 -1 -2 27 2149.07 205.885 28
 1 -2 -27 2484.86 265.658 19
 -1 -2 27 2465.81 260.183 24
 -1 2 -27 2397.45 288.018 18
 -1 2 -27 2143.97 267.193 17
 1 -2 -28 6799.96 496.277 18
 -1 2 -28 8029.12 527.376 13
 -1 -2 28 8348.65 517.356 56
 -1 -2 28 7257.78 439.907 63
 -1 2 -28 7651.98 509.699 61
 -1 2 -28 6708.38 521.012 18
 -1 2 -28 7581.4 503.633 71
 -1 -2 28 7752.54 491.38 24
 1 2 28 7836.23 508.748 70
 -1 -2 28 6673.85 457.441 23
 1 2 28 7251.95 489.287 73
 -1 2 -28 7357.04 511.302 17
 -1 2 -29 8872.44 585.011 17
 1 2 29 9361.53 567.648 73
 -1 -2 29 9138.5 557.334 24
 -1 2 -29 8800.11 611.735 18
 -1 2 -29 8954.12 567.367 71
 -1 -2 29 10003.2 588.287 56
 1 2 29 9283.87 573.745 70
 -1 2 -29 9308.24 601.908 13
 1 -2 -29 8854.78 581.291 18
 -1 2 -29 8959.44 573.547 61
 -1 2 -30 832.766 196.067 13
 -1 -2 30 855.723 195.609 56
 1 -2 -30 697.529 164.278 18
 -1 2 -30 625.402 140.819 71
 1 2 30 1093.58 258.338 50
 -1 2 -30 825.458 164.042 61
 1 2 30 721.633 171.197 70
 -1 2 -30 658.115 166.77 17
 -1 2 -30 914.388 206.152 18
 -1 -2 31 2945.97 277.022 56
 -1 -2 31 2451.48 238.964 24
 -1 2 -31 2840.7 275.142 13
 -1 -2 31 3078.17 275.37 50
 1 2 31 2836.47 319.627 50
 1 2 31 2532.12 251.629 70
 -1 2 -31 2089.2 211.939 15
 -1 2 -31 2707.44 267.637 17
 -1 2 -31 2476.85 244.407 61
 1 -2 -31 2460.99 248.957 18
 -1 2 -31 2200.6 226.46 71
 1 2 32 1162.91 200.787 26
 1 -2 -32 765.521 151.243 62
 -1 -2 32 1257.67 183.27 50
 -1 -2 32 1450.95 173.141 24
 -1 2 -32 936.793 165.149 17
 -1 -2 32 1333.53 200.682 56
 -1 2 -32 1398.69 166.498 71
 -1 2 -32 1263.69 171.241 61
 1 2 32 1321.82 185.748 70
 1 2 32 1420.85 237.266 50
 -1 2 -33 4356.84 340.008 62
 -1 -2 33 3642.68 270.012 24
 1 2 33 4419.61 327.074 26
 -1 -2 33 4139.3 308.574 56
 1 2 33 4537.52 363.664 50
 -1 2 -33 3689.58 269.03 71
 1 -2 -33 3962.65 299.292 62
 -1 2 -33 3322.19 277.379 61
 1 2 33 3913.95 294.085 70
 -1 2 -33 3476.8 287.252 17
 -1 -2 33 3746.49 291.564 50
 1 -2 -34 936.505 139.011 62
 1 2 34 972.105 137.126 70
 1 2 34 894.654 148.507 26
 -1 2 -34 760.094 159.21 62
 -1 -2 34 939.076 150.688 56
 1 2 34 781.821 175.823 50
 -1 2 -34 624.22 111.427 61
 1 -2 -35 6666.89 390.896 62
 1 2 35 6413.6 379.758 70
 -1 -2 35 7432.77 403.234 56
 1 2 35 7241.96 403.548 26
 -1 2 -35 5362.77 366.684 61
 1 2 35 8205.97 459.633 50
 -1 2 -35 7967.09 439.301 62
 1 -2 -35 6648.54 398.572 72
 1 -2 -36 286.007 63.3075 62
 -1 2 -36 571.854 109.854 62
 1 -2 -36 250.305 74.6055 72
 1 2 36 429.18 113.663 50
 -1 -2 36 349.794 83.3196 56
 1 2 37 2403.16 182.673 50
 1 -2 -37 1997.44 166.899 61
 -1 2 -37 2167.3 169.089 62
 -1 3 36 2086.61 180.452 50
 1 3 -36 1989.63 170.795 62
 -1 -3 -36 1670.87 159.954 62
 1 -3 36 1805.57 166.315 70
 -1 -3 -36 1773.61 156.095 61
 1 3 -36 1824.25 162.597 61
 -1 3 36 1821.5 162.337 70
 1 3 -35 2183.71 196.306 61
 1 -3 35 2200.56 206.068 70
 -1 3 35 2355.21 218.287 50
 1 3 -35 2007.15 194.681 62
 -1 -3 -35 1909.29 193.741 18
 1 -3 35 1858.61 171.724 50
 -1 -3 -35 2010.62 187.775 61
 -1 3 35 2129.72 192.312 70
 -1 -3 -34 4364.4 319.783 18
 1 -3 34 4371.91 323.894 70
 -1 3 34 4591.02 312.233 70
 1 -3 34 4170.65 297.642 50
 -1 -3 -34 3595.68 268.922 13
 -1 -3 -34 4228.02 308.664 61
 1 3 -34 4069.99 308.266 62
 1 3 -34 4037.11 304.073 61
 1 -3 33 2937.13 282.227 70
 1 -3 33 2666.34 250.063 50
 -1 -3 -33 2477.18 212.196 17
 -1 -3 -33 3156.41 272.316 18
 -1 -3 -33 2858.02 264.909 61
 -1 -3 -33 2626.31 228.922 13
 -1 3 33 2935.17 261.867 70
 1 3 -33 2883.56 271.332 62
 1 3 -33 2777.65 259.002 61
 -1 -3 -32 664.676 136.52 13
 -1 -3 -32 744.971 164.983 61
 1 -3 32 576.573 143.909 56
 1 3 -32 676.213 169.38 62
 -1 -3 -32 735.793 175.491 18
 1 3 -32 729.134 175.603 61
 -1 3 32 753.672 172.319 70
 1 -3 32 519.95 145.646 50
 1 -3 32 680.74 183.942 70
 -1 -3 -32 549.802 120.825 17
 -1 -3 -32 748.993 159.015 19
 1 3 -31 5519.18 422.495 62
 1 3 -31 4330.72 338.604 72
 -1 -3 -31 5226.28 370.899 17
 1 -3 31 5496.31 389.168 56
 -1 -3 -31 5348.25 383.956 13
 1 -3 31 5337.4 409.335 50
 -1 -3 -31 6129.63 433.113 18
 -1 -3 -31 5870.19 420.362 19
 1 -3 31 5685.42 431.815 70
 -1 -3 -31 5757.49 421.806 61
 1 3 -31 5476.52 412.586 61
 -1 3 31 5405.98 402.28 70
 -1 -3 -30 7104.58 489.673 18
 1 -3 30 6432.39 469.492 50
 -1 -3 -30 6392.89 457.065 65
 -1 3 30 5824.33 385.854 56
 -1 -3 -30 6734.67 438.408 17
 1 3 -30 5956.7 461.422 61
 1 3 -30 6251.16 469.165 62
 -1 3 30 6406.03 463.087 70
 -1 -3 -30 6566.04 449.171 13
 -1 -3 -30 6953.75 485.08 61
 -1 -3 -30 6847.94 478.421 19
 1 -3 30 6593.87 482.57 70
 1 3 -30 5786.55 406.783 72
 1 -3 30 6561.42 447.125 56
 1 3 -29 2798.64 308.341 61
 -1 -3 -29 2847.78 279.298 13
 1 -3 29 2360.43 284.319 50
 -1 3 29 2751.65 232.578 56
 -1 3 29 2989.28 301.245 70
 1 3 -29 2484.12 247.118 72
 1 -3 29 2402.49 268.915 56
 -1 -3 -29 3143.49 297.914 65
 1 -3 29 2432.67 307.97 70
 -1 -3 -29 2566.99 294.48 19
 1 3 -29 2859.77 314.158 62
 1 -3 29 2389.9 241.171 24
 -1 -3 -29 2798.76 298.733 18
 -1 -3 -29 2835.54 298.789 61
 -1 3 28 2189.27 210.273 56
 1 3 -28 2057.81 278.847 62
 1 -3 28 1985.17 266.319 50
 -1 3 28 1775.88 258.669 70
 1 -3 28 1922.69 282.025 70
 -1 -3 -28 2034.66 252.032 13
 1 3 -28 1942.3 263.227 61
 -1 -3 -28 2118.19 259.333 65
 -1 -3 -28 2245.17 276.601 19
 1 -3 28 2231.87 228.249 24
 1 3 -28 1843.88 222.134 72
 -1 -3 -28 1979.41 260.068 61
 1 -3 28 2004.54 227.565 26
 -1 -3 -28 2004.72 275.114 18
 1 -3 28 2006.17 253.58 56
 1 -3 27 1745.9 274.233 70
 1 3 -27 1622.95 246.166 61
 -1 3 27 1761.84 260.703 70
 -1 3 27 1854.14 197.567 56
 1 3 -27 1734.64 260.92 62
 1 -3 27 1638.64 212.3 26
 -1 -3 -27 2144.45 279.804 61
 -1 -3 -27 2390.75 265.131 65
 1 -3 27 1940.64 269.622 50
 -1 -3 -27 1722.43 251.187 19
 1 -3 27 1936.5 247.094 56
 1 -3 27 1916.34 220.893 24
 -1 -3 -27 1606.61 266.369 18
 -1 -3 -26 11286.3 665.796 55
 1 -3 26 9556.26 591.41 24
 1 -3 26 9227.78 610.474 56
 1 3 -26 9474.45 653.598 62
 -1 -3 -26 10675.2 676.294 18
 -1 -3 -26 9933.88 635.656 39
 1 3 -26 9709.17 646.025 61
 1 -3 26 9326.88 600.875 26
 -1 -3 -26 10570 659.302 61
 -1 -3 -26 10501.1 654.879 19
 -1 3 26 11134.2 647.703 70
 -1 -3 -26 10872.5 648.433 65
 -1 3 26 9808.14 567.681 56
 1 -3 26 10325.7 655.053 50
 1 -3 26 10328.9 652.849 70
 -1 -3 -25 12110.2 733.904 61
 -1 -3 -25 12543.5 742.41 19
 -1 -3 -25 12256.8 733.838 55
 -1 3 25 12176.7 719.218 70
 -1 -3 -25 12643.9 724.094 65
 -1 -3 -25 12596.5 757.813 18
 1 3 -25 11152.3 676.777 17
 -1 -3 -25 12250.6 721.735 39
 1 3 -25 11460 739.672 62
 1 -3 25 11348.9 691.175 26
 1 -3 25 12313.9 741.164 50
 -1 3 25 11775 651.602 56
 -1 3 25 11171.6 662.86 22
 1 3 -25 12816.3 750.514 61
 -1 3 25 12518.1 684.386 73
 1 -3 25 12388.2 735.023 70
 1 -3 25 11649.5 698.943 56
 1 -3 25 12225.1 683.861 24
 -1 3 24 1666.45 246.749 70
 1 -3 24 1683.21 229.311 56
 1 -3 24 1491.88 201.006 24
 -1 -3 -24 1843.61 247.514 61
 -1 -3 -24 1700.24 233.669 65
 -1 3 24 1641.06 226.067 22
 -1 -3 -24 1717.65 250.455 55
 -1 3 24 1696.11 191.536 56
 -1 -3 -24 1609.15 249.075 18
 1 -3 24 1838.95 223.399 26
 1 -3 24 1957.49 263.861 70
 -1 3 24 1721.7 204.15 73
 -1 -3 -24 1743.61 240.565 39
 -1 -3 -24 1669.35 243.361 19
 1 3 -24 1597.7 203.967 17
 1 -3 24 2146.05 270.22 50
 1 3 -24 1846.71 250.832 61
 -1 3 23 5999.84 453.38 70
 1 3 -23 6620.09 439.24 17
 -1 3 23 6567.76 436.017 73
 -1 3 23 6846.39 414.625 56
 -1 -3 -23 7538.42 488.731 61
 -1 -3 -23 6525.9 469.253 55
 1 -3 23 6911.7 482.026 50
 1 -3 23 6265.91 444.099 56
 -1 -3 -23 6175.69 458.513 39
 1 3 -23 6255.8 409.672 71
 1 -3 23 7045.96 442.238 24
 1 -3 23 6947.28 484.523 70
 1 -3 23 6850.39 454.41 26
 -1 3 23 6620.94 427.563 22
 1 3 -23 6735.4 484.399 61
 -1 -3 -23 7333.17 472.459 65
 -1 3 23 5492.14 390.336 34
 -1 3 22 6988.84 459.279 64
 -1 3 22 7447.8 432.671 56
 1 -3 22 6544.25 455.614 56
 -1 -3 -22 7072.8 487.111 61
 -1 -3 -22 7844.95 504.392 55
 1 -3 22 7792.45 508.941 50
 1 3 -22 7107.99 458.762 17
 -1 3 22 6926.54 422.04 34
 1 -3 22 7418.23 458.529 24
 1 -3 22 7136.11 470.563 26
 -1 3 22 6862.17 439.641 22
 1 3 -22 6417.9 428.563 71
 -1 -3 -22 7384.94 485.137 39
 -1 3 22 7627.36 491.877 70
 1 3 -22 7134.19 500.532 61
 1 3 -22 7017.72 468.156 13
 -1 -3 -22 6784.11 480.656 65
 1 -3 22 7210.99 494.401 70
 1 3 -21 24377.9 1315.96 18
 1 -3 21 26517.5 1330.1 50
 1 -3 21 26112.8 1286.19 56
 -1 3 21 26299.8 1305.94 70
 -1 -3 -21 26711.8 1318.82 55
 1 -3 21 27324.8 1322.69 70
 1 -3 21 26416.4 1300.84 26
 1 3 -21 26118.1 1287.37 17
 -1 3 21 25845.1 1256.59 22
 1 -3 21 26012 1274.67 24
 1 3 -21 24966.9 1262.66 71
 1 3 -21 24878.2 1290.34 13
 -1 -3 -21 26468.3 1308.05 39
 -1 3 21 27994.7 1257.57 56
 -1 -3 -21 25895 1319.2 61
 -1 3 21 25109.5 1226.13 34
 -1 3 21 25113.3 1264.9 64
 1 3 -21 25887.5 1328.78 61
 -1 3 20 11689 598.607 34
 -1 -3 -20 10654.3 627.673 38
 1 -3 20 11997.7 650.425 56
 -1 -3 -20 11532.2 670.364 55
 1 -3 20 12032.3 686.143 50
 -1 -3 -20 11659.6 675.946 61
 1 -3 20 12239.9 680.494 70
 1 3 -20 11414.4 680.632 61
 -1 3 20 10809.2 630.927 64
 -1 3 20 11692.6 625.705 22
 1 3 -20 11604.9 657.532 13
 1 -3 20 11752.8 660.077 26
 -1 3 20 11906 670.703 70
 1 -3 20 11854.1 640.852 24
 1 3 -20 11224.2 642.815 17
 1 3 -20 10825.1 621.916 71
 -1 -3 -20 12825.5 673.08 39
 1 3 -20 11122.4 676.102 18
 1 -3 20 10946.7 599.867 63
 1 -3 19 1468.08 175.98 24
 -1 -3 -19 1369.08 193.049 61
 1 -3 19 1211.82 199.217 70
 -1 3 19 1201.83 200.044 53
 1 3 -19 1280.14 150.908 71
 -1 -3 -19 1447.32 191.142 55
 1 -3 19 1392.78 147.625 63
 1 3 -19 1458.04 181.349 13
 -1 3 19 1522.74 186.132 22
 1 -3 19 1283.87 176.367 26
 -1 3 19 1260.1 174.148 27
 1 3 -19 1400.51 193.807 61
 1 -3 19 1426.35 182.352 56
 -1 -3 -19 1242.8 158.229 38
 -1 3 19 1606.2 211.027 70
 1 3 -19 1343.55 165.376 17
 -1 3 19 1270.54 162.463 34
 -1 3 19 1400.35 189.144 64
 1 3 -19 1506.66 196.694 18
 -1 -3 -19 1370.32 184.032 39
 -1 3 19 1374.6 163.457 32
 1 3 -18 9232.32 561.094 13
 -1 -3 -18 9745.74 547.652 38
 1 -3 18 9619.4 565.976 26
 1 3 -18 9572.54 541.674 71
 -1 3 18 10282 555.751 53
 -1 -3 -18 10244.3 579.612 55
 1 3 -18 8478.75 536.96 1
 -1 3 18 10319.4 551.59 64
 -1 3 18 9903.59 546.526 27
 -1 -3 -18 9392.89 566.762 39
 1 3 -18 9969.65 584.966 18
 1 -3 18 10248.7 585.437 70
 -1 3 18 10085 549.244 32
 1 3 -18 9891.41 558.801 17
 1 3 -18 8804.95 577.452 61
 -1 3 18 10615.9 544.059 22
 1 -3 18 9912.02 558.682 56
 -1 -3 -18 11355.4 597.455 61
 1 -3 18 10529.7 557.619 24
 1 -3 18 9280.48 519.982 63
 -1 3 18 10606.2 581.001 70
 -1 3 18 9945.29 514.192 34
 1 -3 17 5516.52 327.731 63
 -1 3 17 6249.75 359.795 32
 1 3 -17 5055.87 372.807 61
 -1 -3 -17 5828.42 350.999 38
 -1 3 17 5900.17 356.43 27
 1 -3 17 5453.55 355.206 56
 -1 -3 -17 6029.61 382.47 61
 -1 -3 -17 5530.17 352.76 67
 -1 -3 -17 5853.33 360.095 10
 -1 -3 -17 5337.83 364.147 2
 1 -3 17 4770.51 333.82 3
 -1 3 17 5247.32 338.789 22
 1 3 -17 5235.67 339.341 71
 -1 3 17 6047.36 327.056 34
 -1 -3 -17 5760.96 342.551 20
 1 3 -17 5378.07 374.288 18
 -1 3 17 5802.16 379.164 70
 -1 -3 -17 5321.69 364.913 3
 -1 3 17 5000.58 348.965 12
 -1 3 17 5960.81 359.593 53
 1 3 -17 5079.07 342.968 10
 1 3 -17 4997.78 355.397 13
 1 3 -17 5254.79 353.3 17
 1 -3 17 5874.32 381.954 70
 1 -3 17 5783.22 352.915 24
 -1 3 17 5493.39 349.871 64
 -1 -3 -17 5306.68 361.287 39
 1 3 -17 4950.56 340.289 1
 1 -3 16 1782.18 200.62 1
 -1 -3 -16 1623.5 159.025 20
 1 3 -16 1807.29 202.994 11
 -1 -3 -16 1892.26 177.466 10
 -1 3 16 1999.63 188.983 64
 1 3 -16 1782.29 171.923 1
 -1 -3 -16 1554.69 175.062 3
 1 -3 16 1485.76 157.532 3
 -1 3 16 1817.52 178.598 22
 -1 -3 -16 1653.89 188.575 1
 1 -3 16 1827.44 200.651 70
 1 3 -16 1960.55 169.384 71
 -1 -3 -16 1882.42 180.702 9
 -1 -3 -16 1951.69 174.768 38
 -1 3 16 2031.48 198.693 53
 -1 -3 -16 2001.88 192.04 61
 1 3 -16 1990.96 189.081 13
 -1 -3 -16 1946.98 179.608 67
 1 3 -16 1852.67 175.069 10
 1 -3 16 1898.64 160.723 63
 -1 3 16 1992.15 193.403 12
 -1 -3 -16 1715.01 182.215 2
 1 -3 16 1740.99 181.837 56
 -1 3 16 2125.99 189.428 27
 1 3 -16 1730.83 192.988 61
 -1 3 16 1889.29 189.405 10
 -1 3 16 2098.14 168.978 34
 1 3 -16 1744.78 189.684 18
 -1 3 16 2052.25 188.866 32
 1 -3 16 1947.17 177.182 24
 1 3 -16 1869.19 180.564 17
 1 -3 15 37086.6 1832.02 1
 -1 3 15 41465 1798.66 32
 1 3 -15 36670.7 1784 10
 -1 3 15 38870.6 1780.85 64
 1 3 -15 37686.5 1796.31 17
 1 3 -15 37318.1 1784.31 71
 -1 -3 -15 38133.8 1822 1
 1 -3 15 37131.6 1765.24 63
 -1 -3 -15 37853.2 1808.01 2
 -1 -3 -15 36908 1786.83 10
 1 3 -15 38776.5 1792.12 1
 1 3 -15 38908.1 1839.41 11
 1 3 -15 39421.8 1827.16 61
 -1 3 15 42134.9 1792.64 53
 1 3 -15 40050.9 1823.95 18
 -1 -3 -15 39300.4 1811.87 3
 1 3 -15 38029.8 1802.6 13
 -1 -3 -15 40154.9 1800.18 9
 1 -3 15 38282.5 1791.74 56
 -1 -3 -15 39174 1789.82 38
 1 -3 15 37217.3 1808.05 70
 -1 -3 -15 39246 1781.06 20
 1 -3 15 34770.4 1776.02 3
 -1 -3 -15 38387.7 1792.88 67
 -1 3 15 42661.7 1819.86 10
 1 -3 15 39700.5 1790.15 24
 -1 3 15 39607.8 1814.91 12
 -1 3 15 39942.7 1788.32 27
 -1 3 15 39608.6 1753.21 34
 1 3 -14 18409.6 1021.59 12
 -1 -3 -14 20770 982.649 20
 -1 3 14 20706.5 1018.46 12
 -1 -3 -14 21118.9 996.907 67
 1 3 -14 21182.9 996.749 1
 1 -3 14 21083.5 995.43 24
 -1 -3 -14 21404.1 1010.14 2
 1 3 -14 21014.8 1020.93 18
 1 -3 14 20270.4 994.374 56
 -1 3 14 20608.9 1010.92 10
 -1 3 14 19228.8 982.735 27
 -1 -3 -14 21257 990.186 38
 -1 3 14 21575 991.903 53
 1 3 -14 19742.5 986.36 10
 1 -3 14 20071.5 1030.5 1
 -1 -3 -14 22003.4 1014.86 3
 -1 -3 -14 20716.6 1024.56 1
 1 3 -14 20916 1001 17
 -1 3 14 19054.2 977.848 64
 -1 -3 -14 20535.2 996.95 9
 1 3 -14 20415.6 1020.19 61
 1 3 -14 20515.1 1003.78 13
 -1 -3 -14 20942.3 990.816 10
 1 -3 14 20143.7 1010.9 70
 1 3 -14 21258.5 1040.99 11
 1 -3 14 20083.2 986.742 3
 1 3 -13 26831.1 1178.86 11
 -1 -3 -13 24840.9 1142.25 2
 -1 3 13 22434.3 1118.63 25
 -1 3 13 23012 1118.96 53
 -1 3 13 21635.4 1114.18 27
 1 -3 13 23678.9 1165.66 1
 1 -3 13 24925.9 1146.76 70
 1 3 -13 24191.1 1124.99 10
 -1 -3 -13 25242.9 1165.74 1
 1 -3 13 23293.1 1127.55 56
 1 -3 13 24336.3 1131.51 24
 -1 -3 -13 24518.7 1124.85 38
 1 -3 13 24361.8 1091.65 9
 1 3 -13 24318.1 1140.81 13
 -1 -3 -13 23823.4 1121.71 10
 -1 -3 -13 24482.3 1143.92 3
 1 3 -13 23772.5 1128.39 1
 -1 3 13 23740.8 1133.45 9
 1 3 -13 22723.5 1158.49 12
 1 3 -13 25041.1 1159.34 61
 -1 -3 -13 23637.2 1127.39 67
 -1 3 13 22094.2 1146.84 12
 -1 -3 -13 24031.2 1132.33 9
 1 3 -13 24811.5 1154.13 18
 -1 3 13 21080 1130.59 10
 1 -3 13 24012.2 1122.81 3
 -1 3 12 51337.9 2382.15 10
 1 3 -12 52796.4 2364.59 10
 1 3 -12 55174.6 2409.93 11
 -1 -3 -12 52494.8 2361.54 10
 -1 -3 -12 53562.2 2371.36 9
 -1 -3 -12 51926.7 2379.73 2
 -1 -3 -12 55513.1 2384.94 3
 1 -3 12 50326.8 2377.87 70
 1 3 -12 53286.1 2401.53 12
 1 -3 12 50923.5 2360.44 3
 -1 3 12 53115.6 2374.92 9
 1 3 -12 53477.9 2369.51 1
 1 -3 12 48756.4 2364.9 56
 1 -3 12 53587.5 2332.68 9
 1 3 -12 49924.7 2383.49 18
 1 3 -12 52710.6 2392.35 61
 -1 -3 -12 56372.9 2405.28 1
 -1 3 12 50962.2 2358.57 53
 -1 3 11 29700.3 1380.83 10
 1 3 -11 29801.3 1396.47 12
 -1 -3 -11 29284.5 1376.74 3
 1 3 -11 30662.6 1368.55 1
 -1 -3 -11 29387.4 1359.6 10
 -1 3 11 28953.5 1370.6 9
 -1 -3 -11 30238.9 1374.9 2
 1 3 -11 29131.6 1362.37 10
 -1 -3 -11 30096 1398.22 1
 1 -3 11 28702.9 1358.24 3
 -1 -3 -11 30765 1369.71 9
 1 -3 11 29677.5 1332.25 9
 1 3 -11 28851.7 1396.11 11
 1 3 -10 1010.27 113.309 10
 -1 3 10 1002.32 129.79 10
 1 3 -10 947.121 137.104 11
 -1 -3 -10 1046.68 112.407 9
 -1 3 10 854.736 115.686 9
 1 -3 10 955.345 107.541 3
 1 -3 10 1070.85 139.146 8
 -1 -3 -10 989.791 111.345 10
 -1 -3 -10 1028.57 132.51 1
 1 3 -10 1160.03 112.203 1
 1 3 -10 1017.83 137.29 12
 -1 3 10 1015.98 141.78 3
 -1 -3 -10 850.904 113.61 3
 1 -3 10 1123.2 87.11 9
 -1 -3 -10 1024.07 114.952 2
 1 3 -9 105470 4490.46 12
 1 -3 9 104261 4428.88 9
 -1 3 9 100249 4466.49 9
 -1 3 9 98549.6 4491.2 3
 1 3 -9 103066 4463.43 1
 -1 -3 -9 105525 4455.3 10
 1 -3 9 92699.7 4488.09 8
 -1 -3 -9 104658 4492.27 1
 1 3 -9 98544.2 4455.03 10
 -1 3 9 103272 4473.45 10
 -1 -3 -9 107801 4475.6 3
 1 -3 9 85279.7 4475.77 1
 1 -3 9 98992.5 4454.92 3
 -1 -3 -9 101153 4463.15 9
 -1 -3 -8 47184.6 2080.95 9
 1 -3 8 47245.4 2043.9 9
 -1 -3 -8 47096.5 2104.73 1
 1 3 -8 46127.6 2070.66 10
 1 3 -8 47463.1 2102.59 12
 -1 -3 -8 47714 2088.7 3
 -1 3 8 45074.6 2079.21 9
 -1 3 8 47414.8 2087.09 10
 1 -3 8 44114.7 2097.61 1
 1 3 -8 43148.1 2063.41 5
 -1 -3 -8 47616.9 2068.82 10
 1 -3 7 99409 4566.03 1
 -1 -3 -7 101209 4569.3 1
 -1 3 7 98175.4 4545.52 9
 1 3 -7 102556 4534.64 5
 -1 -3 -7 105968 4557.11 3
 1 -3 7 103353 4511.55 9
 -1 -3 -7 109288 4536.42 10
 -1 3 7 106088 4555.6 10
 1 3 -7 103339 4537.64 10
 1 3 -7 100111 4566.29 12
 1 -3 6 93229.9 4223.79 1
 -1 -3 -6 93774.1 4201.86 7
 -1 -3 -6 98959.7 4215.8 6
 1 -3 6 98288 4172.29 9
 -1 -3 -6 97704.4 4219.91 3
 -1 3 6 91771.6 4214.07 10
 1 3 -6 93309.7 4194.56 5
 -1 3 6 89442.9 4205.02 9
 1 3 -6 95356.6 4197.26 10
 -1 -3 -6 97660 4193.74 10
 1 -3 5 7535 365.182 6
 -1 -3 -5 8645.23 387.312 10
 1 -3 5 8447.06 364.101 9
 1 -3 5 8375.64 396.548 11
 -1 3 5 8062.03 400.721 9
 -1 -3 -5 7386.08 407.658 6
 -1 -3 -5 8429.69 397.352 7
 1 3 -5 8114.19 390.651 5
 -1 3 5 8200.29 414.195 10
 1 3 -5 8800.18 391.969 10
 1 -3 5 8311.83 419.345 1
 -1 -3 -4 110576 4837.57 10
 1 3 -4 113515 4841.64 10
 1 3 -4 109158 4845.57 5
 1 -3 4 112521 4851.89 11
 -1 3 4 107109 4853.68 9
 -1 -3 -4 109356 4850.51 7
 1 -3 4 112409 4871.47 1
 1 3 -3 121998 5227.22 10
 1 -3 3 122894 5243.91 11
 1 -3 3 123700 5259.51 1
 -1 -3 -3 123024 5240.66 7
 1 3 -3 118289 5237.15 5
 1 3 -3 116048 5260.09 12
 -1 3 3 117166 5257.99 5
 -1 -3 -3 116470 5224.23 10
 1 3 -2 129480 5793.4 12
 1 -3 2 124266 5788.07 1
 1 -3 2 136667 5755.66 9
 -1 -3 -2 136013 5786.82 5
 -1 3 2 134920 5796.6 5
 1 3 -2 125051 5757.21 10
 1 3 -2 132262 5774.3 5
 -1 3 2 139901 5778.15 6
 1 3 -1 67105.8 2652.81 12
 1 -3 1 65646.3 2616.32 9
 -1 3 1 58715.4 2624.18 6
 -1 -3 -1 57483.4 2634.07 5
 1 -3 1 58069.3 2654.06 5
 -1 3 1 58146.5 2649.46 5
 1 -3 1 57702.7 2637.52 1
 -1 3 1 47389.4 2645.38 7
 1 -3 0 571039 25152 5
 -1 -3 0 595799 25134.2 5
 -1 3 0 594735 25152.9 5
 -1 3 0 541643 25154 7
 -1 3 0 591456 25120.8 6
 -1 3 0 592866 25156.4 4
 1 -3 0 564750 25119.7 9
 1 3 0 587137 25128.3 7
 1 -3 0 594223 25136.1 1
 1 3 0 529578 25135.6 12
 -1 3 -1 58784.5 2553.62 5
 -1 -3 1 54069.4 2526.98 5
 -1 3 -1 65433.9 2544.59 1
 1 -3 -1 55776.1 2551.34 4
 1 3 1 51852.3 2522.26 7
 1 -3 -1 59591.9 2531.76 1
 -1 -3 1 57755.1 2552.6 11
 -1 3 -1 58317.3 2557.91 4
 -1 -3 1 64176.8 2545.38 12
 -1 3 -1 56655.7 2554.76 7
 -1 -3 1 52948.7 2549.78 6
 1 -3 -1 57589.6 2551.03 5
 1 -3 -1 68999.6 2531.13 9
 -1 3 -1 49634.9 2512.13 6
 1 3 1 70104 2542.96 12
 -1 -3 2 130388 5722.22 6
 1 -3 -2 132742 5694.2 1
 -1 -3 2 129499 5693.56 5
 -1 -3 2 128563 5720.15 11
 1 -3 -2 131368 5719.71 4
 1 -3 -2 129392 5714.69 5
 -1 3 -2 135855 5708.37 1
 1 -3 -2 123969 5719.19 7
 1 -3 -2 132076 5695.4 9
 1 -3 -2 138961 5709.83 3
 -1 -3 2 142796 5711.36 12
 1 3 2 131937 5697.08 12
 -1 3 -2 132152 5722.04 4
 1 3 3 118696 5199.46 2
 1 -3 -3 121496 5231.01 4
 1 -3 -3 122346 5225.88 5
 1 -3 -3 113234 5228.9 7
 -1 -3 3 118072 5217.96 12
 1 -3 -3 120356 5208.48 9
 -1 3 -3 121985 5218.67 1
 1 -3 -3 114592 5220.28 3
 1 3 3 123256 5201.83 12
 -1 -3 3 126544 5220.94 1
 -1 -3 3 104376 5223.39 11
 -1 -3 3 117258 5229.86 6
 1 -3 -4 94075.3 4816.22 7
 -1 3 -4 109524 4810.48 1
 -1 -3 4 112077 4793.43 8
 -1 -3 4 110623 4808.57 1
 1 3 4 110607 4793.04 2
 1 -3 -4 111306 4815.07 5
 1 -3 -4 104213 4801.57 9
 1 3 4 114352 4788.25 12
 1 -3 -4 115166 4815.41 3
 1 3 4 105960 4816.85 6
 -1 -3 5 8019.79 394.301 8
 -1 -3 5 8530.15 412.105 1
 1 3 5 8277.39 385.14 12
 1 -3 -5 8179.26 418.928 3
 -1 3 -5 8306.58 416.402 1
 1 3 5 8355.22 399.256 2
 1 3 5 8241.08 420.804 6
 1 -3 -5 7958.07 407.116 9
 1 -3 -5 8201.43 417.234 5
 1 -3 -6 90427 4051.78 3
 -1 -3 6 93175.5 4026.06 8
 1 -3 -6 95336.9 4048.73 5
 -1 3 -6 93715.4 4051.45 1
 -1 3 -6 91394.6 4027.34 12
 1 -3 -6 92238 4041.95 9
 1 -3 -6 87952.9 4021.21 1
 -1 -3 6 85294 4042.21 12
 1 3 6 94298.4 4051.66 6
 -1 -3 6 95108.5 4044.7 1
 -1 3 -7 103950 4525.37 12
 -1 -3 7 105392 4544.21 1
 1 -3 -7 106004 4557.72 3
 1 -3 -7 101872 4544.2 5
 1 -3 -7 99461.3 4520.12 1
 -1 -3 7 106084 4549.4 12
 -1 -3 7 99726.3 4524.66 8
 1 3 7 105931 4552.36 6
 -1 3 -7 103152 4550.73 1
 -1 -3 8 47979.6 2062.93 12
 1 -3 -8 45892.7 2058.96 5
 -1 3 -8 46263.3 2037 12
 -1 3 -8 39757.1 2058.89 1
 1 -3 -8 46318.9 2072.79 3
 1 -3 -8 45999.1 2034.98 1
 -1 -3 8 45558.9 2057.67 1
 1 3 8 48417.8 2069.53 6
 -1 -3 9 102347 4436.69 12
 -1 -3 9 100282 4433.18 1
 -1 3 -9 98423.5 4412.66 11
 1 3 9 103138 4442.75 6
 1 -3 -9 103505 4453.08 3
 1 -3 -9 101717 4435.13 5
 -1 3 -9 99359.1 4408.78 12
 1 -3 -9 96874.2 4408.83 1
 -1 3 -10 969.116 102.577 11
 -1 3 -10 1075.77 103.771 12
 -1 -3 10 1150.79 125.068 1
 1 -3 -10 1136.81 134.792 3
 -1 -3 10 1172.11 128.708 12
 1 3 10 1124.24 128.177 6
 1 -3 -10 1063.46 100.856 1
 1 -3 -11 28428.4 1334.06 3
 -1 -3 11 29270.6 1342.57 3
 -1 -3 11 29940 1322.17 1
 1 3 11 25971.3 1256.72 12
 1 3 11 28794.1 1324.54 6
 1 -3 -11 28167 1289.23 1
 -1 -3 11 29468.4 1316.13 12
 -1 3 -11 29580 1291.25 12
 -1 3 -11 29233.3 1301.74 11
 1 3 12 53695 2365.89 6
 -1 3 -12 53968 2327.75 12
 -1 -3 12 54856.7 2353.94 12
 -1 3 -12 55114 2344.39 11
 -1 -3 12 52965.8 2358.38 1
 1 3 12 56883.2 2375.55 32
 -1 -3 12 56353.1 2343.32 56
 -1 -3 12 54715.9 2387.7 3
 -1 3 -12 43641.3 2356.35 1
 1 -3 -12 53724.3 2329.1 1
 1 3 12 48002.2 2284.83 12
 1 -3 -12 49633.3 2359.76 66
 1 3 13 25996.3 1141.95 32
 -1 -3 13 26459.7 1111.65 56
 -1 -3 13 25253.3 1082.78 34
 -1 -3 13 24448.5 1116.3 12
 1 -3 -13 24206 1128.73 61
 1 -3 -13 25235.5 1137.36 66
 -1 -3 13 24740.6 1128.04 1
 -1 -3 13 23588.3 1090.23 22
 -1 -3 13 24180 1115.23 70
 -1 3 -13 24660.2 1094.15 12
 -1 3 -13 22458.6 1135.69 1
 1 -3 -13 24184.6 1123.29 55
 -1 -3 13 24842.3 1154.57 3
 -1 3 -13 23226.4 1131.1 19
 1 3 13 23442.7 1141.57 15
 -1 3 -13 24856.6 1141.08 18
 -1 3 -13 24099.1 1122.31 65
 1 3 13 24466 1133.63 6
 1 -3 -13 23168.2 1113.38 39
 1 3 13 19373.5 1037.75 12
 1 -3 -13 24128.5 1092.89 1
 -1 3 -13 24976.8 1111.77 11
 1 -3 -14 20347.9 947.617 55
 -1 -3 14 20096 911.69 22
 -1 -3 14 20279.6 925.351 56
 1 3 14 20532.4 950.738 41
 1 -3 -14 20833.9 915.578 1
 -1 -3 14 20397.3 937.857 70
 -1 3 -14 20040.4 957.861 19
 -1 -3 14 21112.4 939.423 12
 -1 -3 14 20142.6 977.959 3
 1 -3 -14 19907.8 940.526 60
 -1 -3 14 20390.7 942.534 9
 -1 -3 14 20205.1 949.61 1
 -1 3 -14 21391 950.726 65
 1 -3 -14 20053.4 940.003 39
 -1 3 -14 19896.5 961.875 18
 1 -3 -14 21238.9 959.645 61
 -1 3 -14 22256.1 921.021 12
 1 3 14 21317.7 960.336 32
 1 3 14 21291.5 961.528 6
 -1 3 -14 24860.9 971.471 10
 -1 3 -14 19712.6 964.001 1
 -1 -3 14 19599.9 897.052 34
 -1 3 -14 21605.8 939.271 11
 1 -3 -14 21416.9 963.888 66
 1 3 15 39698.5 1763.53 41
 -1 3 -15 42127.5 1774.13 10
 -1 -3 15 37946.8 1752.65 70
 1 3 15 43788.1 1785.31 32
 1 -3 -15 37962.3 1755.16 39
 1 3 15 35566 1723.74 70
 1 -3 -15 36739.1 1765.86 66
 -1 3 -15 37526.6 1779.95 18
 -1 -3 15 37182.1 1751.13 9
 -1 -3 15 37209.5 1743.4 12
 1 -3 -15 36912.1 1749.31 60
 -1 -3 15 35713.9 1704.49 34
 -1 -3 15 35713 1720.16 22
 1 -3 -15 40046.9 1774.88 61
 -1 -3 15 37079.5 1788.93 3
 -1 3 -15 38016.5 1780.28 1
 1 3 15 39641.7 1775.88 6
 -1 3 -15 38189.7 1724.55 12
 1 -3 -15 36426.6 1735.25 65
 1 -3 -15 36864.9 1759.4 55
 -1 3 -15 37644.4 1759.62 65
 -1 3 -15 34809.4 1751.17 61
 -1 -3 15 39175.8 1767.11 1
 -1 3 -15 39251.2 1779.01 19
 1 -3 -15 36900.9 1723.23 1
 -1 3 -15 38155.3 1751.89 11
 1 -3 -16 1705.08 176.033 55
 1 3 16 2382.09 210.213 73
 -1 3 -16 1843.23 180.997 61
 -1 -3 16 1719.26 170.777 9
 1 3 16 1813.41 185.176 41
 -1 -3 16 1510.68 158.346 34
 1 -3 -16 1578.8 148.942 1
 -1 3 -16 1882.33 193.476 19
 1 3 16 1727.57 161.529 70
 -1 -3 16 1697.75 174.307 1
 -1 -3 16 2123.68 194.592 70
 1 3 16 1653.14 179.308 6
 -1 -3 16 1823.99 172.418 24
 1 -3 -16 1753.9 184.628 61
 -1 3 -16 1689.33 167.711 11
 -1 -3 16 1743.63 197.563 3
 1 -3 -16 1786.74 173.916 39
 1 3 16 1846.68 197.307 32
 -1 3 -16 2246.54 195.748 65
 -1 3 -16 1972.68 195.083 10
 -1 3 -16 1710.02 186.097 1
 1 -3 -16 1995.71 205.571 3
 -1 -3 16 1784.86 172.742 22
 1 -3 -16 1838.46 165.085 65
 -1 -3 16 1492.48 159.173 12
 -1 3 -16 1943.78 198.764 18
 1 -3 -16 1975.24 190.24 66
 1 -3 -16 1840.1 174.996 60
 -1 -3 17 5258.89 329.319 22
 1 -3 -17 5590.44 370.063 61
 1 3 17 5440.7 353.484 41
 -1 -3 17 5303.28 355.581 70
 1 -3 -17 5210.71 340.956 60
 1 3 17 5355.48 333.303 70
 1 3 17 5530.56 370.421 32
 1 -3 -17 5577.55 354.407 39
 1 3 17 6098.1 381.921 73
 -1 -3 17 5605.6 337.643 23
 -1 -3 17 5233.73 335.114 12
 -1 3 -17 5641.47 379.105 18
 -1 3 -17 5735.93 375.974 19
 1 -3 -17 5599.38 365.836 66
 -1 3 -17 4555.25 335.317 11
 -1 -3 17 4924.19 313.932 34
 1 -3 -17 5304.98 335.229 65
 -1 -3 17 5313.48 359.114 1
 -1 3 -17 5253.18 355.234 61
 -1 3 -17 5157.53 351.027 65
 1 -3 -17 5278.78 357.335 55
 -1 -3 17 4624.5 333.125 9
 -1 -3 17 6271.46 353.511 24
 1 3 18 9366.53 524.427 70
 -1 -3 18 8941.82 506.292 34
 -1 3 -18 10519.8 581.211 19
 -1 -3 18 8647.89 524.41 12
 1 3 18 9413.91 564.954 32
 1 -3 -18 9446.03 539.295 60
 1 -3 -18 9670.24 546.362 19
 -1 -3 18 9117.46 554.178 1
 1 -3 -18 9508.03 559.665 66
 1 3 18 9326.44 543.94 41
 1 -3 -18 10655.4 582.136 61
 1 -3 -18 9605.62 536.956 65
 -1 -3 18 10215 534.159 23
 1 -3 -18 9040.73 547.257 39
 -1 3 -18 10198.8 568.773 61
 -1 3 -18 11037.3 596.799 18
 -1 3 -18 9427.05 557.908 65
 -1 -3 18 10214 544.026 24
 1 -3 -18 9785.63 562.509 55
 1 3 18 10190.6 572.531 73
 -1 -3 18 10302.8 560.673 70
 1 -3 -19 1305.02 184.28 61
 1 -3 -19 1320.83 159.732 65
 1 -3 -19 1412.57 160.173 60
 -1 -3 19 1486.96 188.787 56
 -1 3 -19 1675.21 204.831 18
 1 -3 -19 1463.81 171.112 19
 -1 -3 19 1832.26 189.104 23
 1 -3 -19 1431.44 188.069 66
 -1 3 -19 1244.2 172.469 61
 1 3 19 1323.76 197.821 32
 1 -3 -19 1335.79 179.612 55
 1 -3 -19 1442.66 181.221 39
 1 3 19 1377.45 164.59 70
 -1 3 -19 1519.14 205.498 13
 1 -3 -19 1419.96 181.398 18
 -1 -3 19 1402.29 194.835 70
 1 3 19 1689.21 204.127 73
 1 3 19 1393.91 173.88 41
 -1 3 -19 1465.43 180.236 65
 -1 -3 19 1521.51 186.174 24
 -1 3 -19 1661.58 200.076 19
 -1 -3 19 1903.66 177.35 28
 1 3 20 11392.4 668.048 32
 -1 3 -20 12302.1 688.213 17
 1 -3 -20 11559.8 667.207 55
 1 -3 -20 11544.5 658.886 18
 -1 3 -20 11809.7 666.609 65
 -1 -3 20 12039 642.41 24
 -1 3 -20 11885.8 679.418 13
 -1 -3 20 12273.6 618.4 28
 -1 3 -20 12526.1 695.883 18
 -1 3 -20 11853.9 667.81 61
 1 3 20 11055.2 626.664 70
 1 3 20 11369.9 664.76 73
 1 -3 -20 10588.3 628.698 65
 1 -3 -20 12229.8 684.754 61
 -1 -3 20 11529 625.809 23
 1 3 20 11738.2 641.386 41
 1 -3 -20 11118.8 660.866 66
 -1 3 -20 11776.9 683.668 19
 -1 -3 20 11339 640.23 56
 -1 -3 20 10929.1 653.809 70
 1 -3 -20 11414.4 646.746 19
 -1 -3 21 27549.3 1251.67 28
 -1 3 -21 27462.5 1337.96 18
 -1 -3 21 26241.7 1259.32 23
 1 -3 -21 24968.6 1272.28 65
 -1 3 -21 26852.9 1322.73 19
 -1 -3 21 25927.3 1301.71 70
 1 -3 -21 26284.4 1294.4 19
 -1 3 -21 25815 1302.97 61
 -1 -3 21 26704.7 1279.19 56
 1 3 21 23438.1 1261.64 41
 1 3 21 24249.2 1260.63 70
 1 3 21 26130.9 1313.3 73
 -1 -3 21 26999.6 1283.77 24
 1 -3 -21 25201.6 1297.42 18
 -1 3 -21 26431.6 1317.45 13
 -1 3 -21 24838.1 1309.63 17
 1 -3 -21 27868.5 1331.31 61
 1 3 21 25583.9 1308.76 32
 1 -3 -21 26372.3 1315.07 55
 1 -3 -21 26522.6 1313.76 66
 -1 3 -21 25766.9 1301.49 65
 1 -3 -22 7337.95 496.965 61
 1 -3 -22 6526.87 448.796 19
 -1 -3 22 7983.13 470.857 56
 -1 -3 22 7211.33 459.837 24
 1 3 22 7058.33 441.259 70
 -1 -3 22 6712.17 415.441 28
 1 3 22 6437.71 469.764 73
 -1 -3 22 7461.2 444.405 23
 -1 3 -22 7616.82 499.181 18
 -1 -3 22 6844.92 471.771 70
 1 -3 -22 7291.73 475.656 18
 -1 3 -22 7505.87 502.222 19
 -1 3 -22 6951.88 464.879 61
 1 -3 -22 6231.9 434.902 65
 -1 3 -22 6582.08 465.551 65
 1 -3 -22 6821.1 469.805 66
 -1 3 -22 6617.89 473.487 17
 -1 3 -22 6726.9 480.639 13
 1 3 22 6643.25 478.094 32
 -1 3 -23 7113.07 491.903 18
 1 -3 -23 6899.79 459.184 18
 -1 -3 23 6249.71 444.435 24
 1 3 23 6995.91 468.942 73
 1 3 23 6179.07 424.027 70
 -1 3 -23 5631 452.504 17
 1 3 23 6838.18 472.683 32
 1 -3 -23 6237.56 427.786 65
 -1 -3 23 6636.01 445.909 56
 1 -3 -23 5947.6 443.149 66
 -1 -3 23 6705.08 423.153 23
 1 -3 -23 6783.04 482.095 61
 -1 3 -23 7049.92 484.257 19
 -1 -3 23 6536.29 407.611 28
 1 -3 -23 6649.05 442.039 19
 -1 3 -23 6611.59 454.394 61
 -1 -3 23 6487.96 466.71 70
 -1 -3 23 6497.27 417.71 63
 -1 3 -23 7041.66 482.939 13
 -1 -3 24 1796.64 247.302 56
 -1 -3 24 1709.03 182.911 48
 1 -3 -24 1822.34 250.22 61
 1 3 24 1493.7 233.545 32
 -1 -3 24 1785.78 252.968 70
 1 -3 -24 1714.19 230.829 66
 1 -3 -24 1525.47 197.443 65
 1 3 24 1713.24 213.635 70
 -1 -3 24 1661.46 196.884 63
 1 3 24 1521 235.573 73
 -1 -3 24 1656.38 218.565 23
 -1 -3 24 1805.01 238.042 24
 -1 3 -24 2095.12 270.252 18
 -1 -3 24 1920.04 204.509 28
 -1 3 -24 1770.77 241.652 17
 1 -3 -24 1522.28 206.356 19
 -1 3 -24 1691.43 210.784 61
 -1 3 -24 1753.68 243.886 13
 1 -3 -24 1618.49 214.851 18
 1 -3 -25 11777.9 699.95 66
 -1 3 -25 11836.7 714.284 17
 -1 -3 25 11801.1 684.95 24
 -1 3 -25 12016.4 731.827 18
 -1 -3 25 12889.1 701.152 56
 -1 -3 25 11266.6 630.245 48
 -1 -3 25 11610.6 638.911 28
 1 -3 -25 12945.3 741.39 61
 -1 -3 25 11919.4 663.609 23
 1 -3 -25 12117.4 706.079 18
 -1 3 -25 11273 707.893 13
 -1 3 -25 11797.9 698.505 61
 1 3 25 11068.5 699.179 32
 1 -3 -25 10760.8 676.289 19
 -1 -3 25 12111.6 655.805 63
 1 3 25 11428.1 702.337 73
 1 3 25 11651.8 675.693 70
 -1 3 -25 11904.5 703.489 71
 -1 -3 25 12053.9 719.469 70
 -1 3 -26 10096.3 637.279 17
 1 3 26 10016.4 600.321 70
 1 3 26 10235.1 634.753 32
 1 -3 -26 10755.4 664.228 61
 -1 -3 26 10360.6 613.996 24
 -1 -3 26 8927.72 552.845 28
 1 -3 -26 9354.73 602.992 19
 1 -3 -26 9840.44 621.381 18
 -1 3 -26 11201.9 662.365 13
 -1 -3 26 10976.5 633.719 56
 -1 3 -26 10187.8 657.831 18
 -1 -3 26 10324 591.858 23
 -1 -3 26 9054.01 567.156 63
 1 -3 -26 9866.93 621.141 66
 1 3 26 10037.1 628.072 73
 -1 -3 26 10691.8 657.438 70
 -1 3 -26 9659.68 614.195 61
 -1 3 -26 10006.3 619.306 71
 -1 3 -27 1739.78 266.397 18
 1 -3 -27 1660.65 227.539 18
 -1 3 -27 1664.88 232.153 17
 -1 -3 27 1775.33 227.771 23
 1 3 27 2114.78 238.432 70
 -1 -3 27 1764.66 233.788 24
 1 -3 -27 1534.88 262.263 61
 -1 -3 27 2142.87 294.159 70
 1 -3 -27 1614.33 218.223 19
 -1 3 -27 1803.66 220.16 61
 1 -3 -27 1710.01 227.593 66
 -1 -3 27 1984.97 203.855 63
 -1 3 -27 2079.68 256.945 13
 -1 -3 27 2059.75 267.266 56
 -1 3 -27 1629.68 223.321 71
 1 3 27 1632.42 234.309 32
 1 3 27 1815.51 237.945 73
 -1 -3 27 2169.35 208.625 28
 1 -3 -28 1776 224.827 66
 -1 -3 28 1897.74 201.755 63
 -1 3 -28 2374.02 273.904 13
 1 3 28 1818.66 239.53 73
 -1 -3 28 1730.01 192.473 28
 -1 -3 28 2494.17 307.665 70
 -1 -3 28 2293.53 274.149 56
 1 3 28 1954.23 233.12 70
 -1 3 -28 2206.25 245.315 61
 -1 3 -28 2392.91 250.266 71
 -1 -3 28 1987.22 237.947 23
 1 -3 -28 2166.93 283.146 61
 1 -3 -28 1841.16 240.358 18
 -1 -3 28 2171.28 256.636 24
 -1 3 -28 2276.98 268.668 17
 1 -3 -29 2501.8 295.971 61
 -1 -3 29 2618.4 294.405 56
 -1 3 -29 2418.04 272.771 17
 1 3 29 2366.71 260.136 73
 1 -3 -29 2638.44 267.619 18
 -1 -3 29 2475.55 264.437 24
 -1 3 -29 2353.48 278.56 13
 -1 -3 29 2708.94 263.285 50
 -1 -3 29 2714.41 317.244 70
 -1 3 -29 2478.26 259.815 71
 -1 -3 29 2217.66 210.717 63
 -1 3 -29 2290.06 242.014 61
 1 3 29 2383.55 246.291 70
 -1 3 -30 6228.53 443.464 17
 -1 -3 30 7098.63 493.468 70
 -1 3 -30 5436.7 399.264 15
 -1 -3 30 6053.68 427.663 50
 -1 3 -30 6263.15 430.49 71
 -1 -3 30 6984.19 442.494 24
 1 3 30 6116.28 427.758 73
 1 -3 -30 6149.24 436.533 18
 -1 3 -30 6932.91 471.034 13
 1 3 30 6057.3 420.778 70
 -1 -3 30 6955.43 465.596 56
 -1 3 -30 5845.39 421.156 61
 1 -3 -30 7069.53 488.316 61
 1 -3 -31 5845.5 428.026 61
 -1 3 -31 5570.48 374.343 71
 1 -3 -31 5421.85 382.324 18
 -1 3 -31 5009.36 366.541 61
 -1 -3 31 5539.99 375.112 24
 -1 3 -31 4202.31 329.648 15
 -1 -3 31 5540.62 373.027 50
 -1 3 -31 5104.74 380.866 17
 1 3 31 5186.19 366.175 70
 1 3 31 4689.55 353.824 73
 -1 -3 31 6201.87 442.718 70
 -1 -3 31 5690.38 404.469 56
 -1 -3 32 853.087 205.985 70
 1 -3 -32 651.306 166.181 61
 -1 3 -32 620.493 125.558 61
 1 -3 -32 468.957 127.529 62
 -1 3 -32 665.162 163.584 62
 -1 3 -32 754.167 155.687 17
 1 3 32 756.847 140.465 70
 -1 3 -32 461.167 114.978 71
 -1 -3 32 488.575 139.924 24
 -1 -3 32 605.43 169.454 56
 -1 3 -33 2685.76 260.053 62
 1 -3 -33 2269.35 253.574 61
 -1 -3 33 2455.71 217.702 24
 1 3 33 2875.91 266.272 26
 -1 -3 33 2781.99 287.555 70
 -1 3 -33 2629.92 220.466 61
 -1 -3 33 2912.39 257.36 56
 1 3 33 2686.9 221.591 70
 -1 3 -33 2687.7 214.417 71
 1 -3 -33 2315.38 220.478 62
 1 -3 -34 3541.59 257.662 62
 1 3 34 3985.46 298.263 26
 -1 -3 34 3639.24 252.623 24
 -1 3 -34 3297.86 244.734 61
 -1 3 -34 4324.91 309.177 62
 -1 -3 34 4271.63 294.506 56
 -1 3 -35 1901.42 188.903 62
 -1 -3 35 2011.54 183.035 56
 1 3 35 2001.67 179.136 26
 1 3 35 2312.18 221.944 50
 1 3 36 2118.94 190.165 50
 -1 -3 36 1625.59 146.536 56
 -1 3 -36 2182.45 174.283 62
 -1 3 -37 3301.66 220.382 62
 1 3 37 3767.18 237.951 50
 -1 4 36 2236.92 183.629 50
 1 4 -36 2084.3 160.86 61
 -1 4 36 1899.69 152.376 70
 1 -4 36 2140.91 174.229 70
 -1 -4 -36 2122.81 166.312 61
 -1 -4 -36 1564.45 147.93 62
 1 4 -36 2121.21 170.435 62
 1 4 -35 -13.3846 69.4182 61
 -1 -4 -35 69.2884 81.5518 61
 -1 4 35 69.053 104.96 50
 1 -4 35 78.5406 102.918 70
 1 4 -35 -56.6239 80.605 62
 -1 -4 -35 28.4331 76.2132 18
 -1 4 35 156.445 89.5263 70
 1 -4 34 1240.23 185.189 70
 -1 4 34 851.95 140.505 70
 1 4 -34 937.109 138.943 61
 -1 -4 -34 962.381 147.756 18
 -1 -4 -34 939.37 142.42 61
 -1 -4 -34 693.244 103.788 13
 1 4 -34 790.528 145.667 62
 1 4 -33 345.75 118.802 61
 1 -4 33 156.932 143.179 70
 -1 4 33 224.948 126.376 70
 -1 -4 -33 186.684 123.732 18
 1 -4 33 208.689 101.059 50
 -1 -4 -33 145.876 82.3031 13
 1 4 -33 376.688 145.326 62
 -1 -4 -33 233.331 121.868 61
 1 -4 32 239.477 159.39 70
 1 4 -32 115.486 119.251 61
 -1 4 32 214.914 138.677 70
 -1 -4 -32 126.478 82.3422 17
 -1 -4 -32 263.818 108.208 13
 1 4 -32 226.871 139.109 62
 -1 -4 -32 330.488 139.294 18
 -1 -4 -32 261.98 135.462 61
 1 -4 32 201.778 112.846 50
 1 -4 32 312.102 141.864 56
 -1 -4 -32 340.964 127.026 19
 1 -4 31 445.401 136.458 50
 -1 -4 -31 590.783 140.162 13
 -1 -4 -31 544.623 161.882 19
 1 -4 31 710.48 207.241 70
 -1 -4 -31 596.973 165.779 61
 -1 -4 -31 540.401 143.698 65
 -1 4 31 555.213 159.63 70
 -1 -4 -31 760.497 182.297 18
 1 -4 31 438.956 156.06 56
 1 4 -31 673.455 186.938 62
 1 4 -31 494.788 148.52 61
 1 -4 31 495.771 123.297 24
 -1 -4 -31 675.846 131.96 17
 -1 -4 -30 6080.82 465.693 18
 -1 -4 -30 6318.77 467.358 61
 1 -4 30 5826.36 436.115 50
 1 4 -30 5929.18 453.983 61
 -1 -4 -30 6912.87 454.913 65
 1 -4 30 6482.1 420.39 24
 -1 -4 -30 5954.53 426.924 13
 -1 4 30 6683.47 451.354 70
 1 -4 30 6756.72 481.298 70
 1 -4 30 6277.09 447.829 56
 -1 -4 -30 6864.89 471.366 19
 1 4 -30 6336.15 468.695 62
 1 -4 29 385.756 158.728 50
 1 -4 29 260.836 161.568 56
 -1 4 29 490.243 172.325 70
 -1 -4 -29 299.165 159.629 18
 -1 -4 -29 141.119 139.648 65
 1 4 -29 237.496 101.444 72
 1 4 -29 186.778 171.798 62
 -1 -4 -29 374.64 172.294 61
 -1 -4 -29 321.93 135.282 13
 1 -4 29 235.876 199.661 70
 -1 -4 -29 205.633 142.63 19
 1 -4 29 313.222 135.477 24
 1 4 -29 261.236 154.184 61
 -1 4 28 8005.05 530.014 70
 1 4 -28 7273.95 483.685 72
 1 -4 28 8427.17 547.218 50
 -1 -4 -28 7853.64 559.765 61
 1 -4 28 8382.47 516.211 24
 1 -4 28 8332.83 570.818 70
 -1 -4 -28 8326.92 561.584 19
 1 4 -28 7672.93 549.428 61
 -1 -4 -28 8328.58 570.783 18
 1 4 -28 8608.74 568.978 62
 1 -4 28 7268.1 528.144 56
 -1 -4 -28 8039.88 533.48 65
 -1 4 27 1751.69 237.818 70
 1 4 -27 1719.49 269.974 62
 -1 -4 -27 1679.77 241.397 19
 -1 -4 -27 1619.84 249.123 55
 -1 4 27 1652.16 205.812 73
 -1 -4 -27 1918.05 265.604 61
 1 -4 27 1901.3 225.446 24
 1 4 -27 1527.55 238.727 61
 1 -4 27 1915.25 287.667 70
 -1 -4 -27 1769.75 241.941 65
 1 -4 27 1600.25 233.143 50
 -1 4 27 1670.34 180.444 56
 1 4 -27 1463.54 194.942 72
 1 -4 27 1766.97 253.636 56
 -1 -4 -27 1370.92 236.128 18
 -1 -4 -26 4522.73 391.01 55
 1 4 -26 4645.06 399.233 61
 -1 4 26 4491.85 381.099 70
 -1 4 26 4239.64 304.748 56
 1 -4 26 4693.22 358.828 24
 1 -4 26 4208.86 373.23 50
 1 -4 26 4814.35 420.743 70
 -1 -4 -26 4717.14 379.393 65
 -1 -4 -26 4553.31 411.381 18
 -1 -4 -26 4392.18 392.563 19
 1 -4 26 4419.26 379.068 56
 1 4 -26 4322.64 408.113 62
 -1 4 26 4458.83 344.652 73
 -1 -4 -26 4895.74 400.045 61
 1 4 -26 3831.99 326.783 72
 1 4 -25 6927.07 469.639 72
 1 -4 25 7583.64 486.537 24
 -1 4 25 6863.36 451.43 22
 1 4 -25 6886.69 445.891 71
 -1 -4 -25 7674.35 530.666 61
 1 -4 25 7281.29 507.761 50
 -1 4 25 7877.38 490.428 73
 1 -4 25 7595.65 510.505 56
 -1 -4 -25 7725.94 506.928 65
 -1 4 25 7598.28 511.025 70
 1 -4 25 7964.13 546.543 70
 -1 4 25 6835.18 428.592 56
 -1 -4 -25 6818.09 516.603 19
 -1 -4 -25 6874.43 531.949 18
 1 4 -25 7236.64 534.848 62
 1 -4 25 7499.82 476.417 26
 1 4 -25 7241.87 522.302 61
 -1 -4 -25 6624.55 504.855 55
 -1 4 24 2101.08 202.866 56
 1 -4 24 2010.52 259.133 56
 -1 -4 -24 2607.39 272.856 65
 1 4 -24 2470.45 275.431 61
 1 4 -24 1950.4 278.527 62
 1 -4 24 2139.2 264.415 50
 -1 -4 -24 2277.03 277.934 61
 1 -4 24 2572.75 307.513 70
 -1 4 24 1855.2 230.137 22
 1 4 -24 2075.59 231.834 72
 -1 4 24 2376.93 246.374 73
 1 -4 24 2287.16 234.761 26
 -1 4 24 1928.1 267.67 70
 1 -4 24 1956.98 239.171 24
 1 4 -24 1851.17 202.674 71
 -1 -4 -24 1986.87 267.424 55
 1 4 -23 555.433 121.426 71
 1 -4 23 732.272 167.512 24
 1 -4 23 587.128 207.844 70
 1 -4 23 683.552 147.151 26
 -1 4 23 315.527 147.41 34
 -1 -4 -23 587.618 174.276 61
 -1 4 23 422.134 164.685 22
 1 -4 23 437.921 159.332 50
 -1 -4 -23 585.824 178.268 55
 1 4 -23 445.153 158.56 61
 -1 4 23 447.005 124.338 56
 -1 -4 -23 442.196 162.52 65
[truncated: 2,094,257 more chars]
